# Supplementary material for: Conductive Hybrid Crystal Composed from Polyoxomolybdate and Deprotonatable Ionic-Liquid Surfactant
Source: Int J Mol Sci. 2016 Jun 23;17(7):994. doi: 10.3390/ijms17070994 (PMC4964370; doi:10.3390/ijms17070994)
Supplement: Supplementary file 1 [file ijms-17-00994-s001.cif]

data_global
_audit_creation_date                               2016-04-06
_audit_creation_method                            'by CrystalStructure 4.1.1'
_audit_update_record                               ?

#==============================================================================
# PROCESSING SUMMARY (IUCr Office Use Only)

_journal_date_recd_electronic                      ?
_journal_date_from_coeditor                        ?
_journal_date_accepted                             ?
_journal_coeditor_code                             ?

#==============================================================================
# SUBMISSION DETAILS

_publ_contact_author_name                         'Takeru Ito'
_publ_contact_author_email                        'takeito@keyaki.cc.u-tokai.ac.jp'
_publ_contact_author_fax                          '81-463-50-2094'
_publ_contact_author_phone                        '81-463-58-1211 ex.3737'
_publ_contact_letter
;
    ENTER TEXT OF LETTER
;
_publ_requested_journal                           'ENTER JOURNAL NAME HERE'
_publ_requested_category
                                               'CHOOSE FI FM FO CI CM CO or AD'
_publ_requested_coeditor_name                      ?

#==============================================================================
# TITLE AND AUTHOR LIST

_publ_section_title
;
    ENTER SECTION TITLE
;
_publ_section_title_footnote
;
    ENTER FOOTNOTE TO TITLE OF PAPER
;
loop_
_publ_author_name
_publ_author_footnote
_publ_author_address
' FIRST AUTHORS NAME '
;
  FIRST AUTHORS FOOTNOTES
;
;
  FIRST AUTHORS ADDRESS
;
_publ_section_synopsis
;
    ENTER SYNOPSIS
;

#==============================================================================
# TEXT

_publ_section_abstract
;
    ENTER ABSTRACT
;
_publ_section_comment
;
    ENTER TEXT
;
_publ_section_references
;
    ENTER OTHER REFERENCES

    Rigaku (2015). CrystalStructure. Version 4.1.1. 
    Rigaku Corporation, Tokyo, Japan.

    Sheldrick, G. M. (2008). Acta Cryst. A64, 112-122.
    SHELXS Version 2013/1

    Sheldrick, G.M. (2008) SHELXL Version 2014/7, Acta Cryst. A64, 112-122.

    Rigaku (1998). REQAB. 
    Rigaku Corporation, Tokyo, Japan.

;
_publ_section_figure_captions
;
    ENTER FIGURE CAPTIONS
;
_publ_section_exptl_prep
;
    ENTER COMPOUND PREPARATION DETAILS
;
_publ_section_exptl_refinement
;
    ENTER SPECIAL DETAILS OF THE REFINEMENT
;

#==============================================================================
data_C12imiMo8-1

#==============================================================================
# CHEMICAL DATA

_chemical_formula_sum                             'C60 H116 Mo8 N8 O26'
_chemical_formula_moiety                          'C60 H116 Mo8 N8 O26'
_chemical_formula_weight                           2133.13
_chemical_melting_point                            ?

#==============================================================================
# CRYSTAL DATA
_space_group_crystal_system                        monoclinic
_space_group_name_H-M_alt                         'P 1 21/c 1'
_space_group_name_Hall                            '-P 2ybc'
_space_group_IT_number                             14
loop_
_space_group_symop_id
_space_group_symop_operation_xyz
1   '+X,+Y,+Z'
2   '-X,1/2+Y,1/2-Z'
3   '-X,-Y,-Z'
4   '+X,-1/2-Y,-1/2+Z'
#------------------------------------------------------------------------------
_cell_length_a                                     21.859(4)
_cell_length_b                                     10.0395(18)
_cell_length_c                                     20.683(4)
_cell_angle_alpha                                  90.0000
_cell_angle_beta                                   114.307(2)
_cell_angle_gamma                                  90.0000
_cell_volume                                       4136.7(14)
_cell_formula_units_Z                              2
_cell_measurement_reflns_used                      8443
_cell_measurement_theta_min                        1.97
_cell_measurement_theta_max                        25.36
_cell_measurement_temperature                      93
#------------------------------------------------------------------------------
_exptl_crystal_description                         prism
_exptl_crystal_colour                              colorless
_exptl_crystal_size_max                            0.200
_exptl_crystal_size_mid                            0.200
_exptl_crystal_size_min                            0.200
_exptl_crystal_density_diffrn                      1.712
_exptl_crystal_density_meas                        ?
_exptl_crystal_density_method                     'not measured'
_exptl_crystal_F_000                               2152.00
_exptl_absorpt_coefficient_mu                      1.244
_exptl_absorpt_correction_type                     multi-scan
_exptl_absorpt_process_details                    'REQAB (Rigaku, 1998)'
_exptl_absorpt_correction_T_min                    0.657
_exptl_absorpt_correction_T_max                    0.780

#==============================================================================
# EXPERIMENTAL DATA

_diffrn_ambient_temperature                        93
_diffrn_radiation_type                            'Mo K\a'
_diffrn_radiation_wavelength                       0.71075
_diffrn_measurement_device_type                   'Rigaku Saturn70'
_diffrn_measurement_method                         \w
_diffrn_detector_area_resol_mean                   7.314
_diffrn_reflns_number                              27938
_diffrn_reflns_av_R_equivalents                    0.0463
_diffrn_reflns_theta_max                           25.357
_diffrn_reflns_theta_min                           1.974
_diffrn_reflns_theta_full                          25.242
_diffrn_measured_fraction_theta_max                0.997
_diffrn_measured_fraction_theta_full               0.999
_diffrn_reflns_limit_h_min                        -26
_diffrn_reflns_limit_h_max                         26
_diffrn_reflns_limit_k_min                        -12
_diffrn_reflns_limit_k_max                         11
_diffrn_reflns_limit_l_min                        -20
_diffrn_reflns_limit_l_max                         24
_diffrn_standards_number                           0
_diffrn_standards_interval_count                   .
_diffrn_standards_decay_%                          ?
_diffrn_reflns_Laue_measured_fraction_max    0.997
_diffrn_reflns_Laue_measured_fraction_full   0.999
_diffrn_reflns_point_group_measured_fraction_max   0.997
_diffrn_reflns_point_group_measured_fraction_full  0.999
_reflns_number_total                               7550
_reflns_number_gt                                  6001
_reflns_threshold_expression                       F^2^>2.0\s(F^2^)
_reflns_Friedel_coverage          0.000
_reflns_Friedel_fraction_max      .
_reflns_Friedel_fraction_full     .

#==============================================================================
# REFINEMENT DATA

_refine_special_details
;
    Refinement was performed using all reflections. The weighted 
    R-factor (wR) and goodness of fit (S) are based on F^2^.
    R-factor (gt) are based on F. The threshold expression of
    F^2^ > 2.0 sigma(F^2^) is used only for calculating R-factor (gt).
;
_refine_ls_structure_factor_coef                   Fsqd
_refine_ls_R_factor_all                            0.0579
_refine_ls_R_factor_gt                             0.0422
_refine_ls_wR_factor_ref                           0.1292
_refine_ls_wR_factor_gt                            0.1063
_refine_ls_number_restraints                       0
_refine_ls_hydrogen_treatment                      constr
_refine_ls_number_reflns                           7550
_refine_ls_number_parameters                       460
_refine_ls_goodness_of_fit_ref                     1.203
_refine_ls_weighting_scheme                        calc
_refine_ls_weighting_details
                   'w = 1/[\s^2^(Fo^2^)+(0.0584P)^2^] where P=(Fo^2^+2Fc^2^)/3'
_atom_sites_solution_hydrogens                     geom
_atom_sites_solution_primary                       direct
_atom_sites_solution_secondary                     difmap
_refine_ls_shift/su_max                            0.000
_refine_diff_density_max                           0.98
_refine_diff_density_min                          -1.20
_refine_ls_extinction_method                       none
_refine_ls_extinction_coef                         ?

loop_
_atom_type_symbol
_atom_type_description
_atom_type_scat_dispersion_real
_atom_type_scat_dispersion_imag
_atom_type_scat_source
  'C' 'C'  0.0033 0.0016 
;
International Tables for Crystallography
(Vol. C, Tables 4.2.6.8 and 6.1.1.4)
;
  'H' 'H'  0.0000 0.0000 
;
International Tables for Crystallography
(Vol. C, Table 6.1.1.4)
;
  'N' 'N'  0.0061 0.0033 
;
International Tables for Crystallography
(Vol. C, Tables 4.2.6.8 and 6.1.1.4)
;
  'Mo' 'Mo'  -1.6832 0.6857 
;
International Tables for Crystallography
(Vol. C, Tables 4.2.6.8 and 6.1.1.4)
;
  'O' 'O'  0.0106 0.0060 
;
International Tables for Crystallography
(Vol. C, Tables 4.2.6.8 and 6.1.1.4)
;

#==============================================================================
# ATOMIC COORDINATES AND THERMAL PARAMETERS

loop_
 _atom_site_label
 _atom_site_type_symbol
 _atom_site_fract_x
 _atom_site_fract_y
 _atom_site_fract_z
 _atom_site_U_iso_or_equiv
 _atom_site_adp_type
 _atom_site_occupancy
 _atom_site_site_symmetry_order  
 _atom_site_calc_flag
 _atom_site_refinement_flags_posn
 _atom_site_refinement_flags_adp
 _atom_site_refinement_flags_occupancy
 _atom_site_disorder_assembly
 _atom_site_disorder_group
Mo1 Mo 0.15620(2) 0.00025(4) 0.11356(2) 0.01426(13) Uani 1 1 d . . . . .
Mo2 Mo 0.00262(2) 0.17998(4) 0.00805(2) 0.01325(12) Uani 1 1 d . . . . .
Mo3 Mo 0.03482(2) -0.00174(4) 0.16959(2) 0.01336(13) Uani 1 1 d . . . . .
Mo4 Mo -0.13499(2) 0.00189(4) 0.06387(2) 0.01665(13) Uani 1 1 d . . . . .
O1 O 0.22301(17) 0.1013(3) 0.13423(18) 0.0233(8) Uani 1 1 d . . . . .
O2 O 0.14690(16) -0.0731(4) 0.02261(17) 0.0203(8) Uani 1 1 d . . . . .
O3 O 0.18721(17) -0.1396(3) 0.16207(17) 0.0223(8) Uani 1 1 d . . . . .
O4 O 0.08981(16) 0.1632(3) 0.03452(17) 0.0204(8) Uani 1 1 d . . . . .
O5 O 0.11330(16) 0.0797(3) 0.16944(16) 0.0175(7) Uani 1 1 d . . . . .
O6 O -0.01854(19) 0.3399(4) -0.01759(19) 0.0277(9) Uani 1 1 d . . . . .
O7 O -0.04427(16) 0.0734(4) -0.06797(17) 0.0216(8) Uani 1 1 d . . . . .
O8 O -0.01847(16) 0.1532(3) 0.08219(17) 0.0197(8) Uani 1 1 d . . . . .
O9 O 0.06917(17) -0.1415(3) 0.21776(17) 0.0216(8) Uani 1 1 d . . . . .
O10 O 0.01839(17) 0.1020(3) 0.22583(17) 0.0210(8) Uani 1 1 d . . . . .
O11 O -0.05522(16) -0.0815(3) 0.11809(16) 0.0169(7) Uani 1 1 d . . . . .
O12 O -0.14564(18) 0.1272(3) 0.11464(17) 0.0232(8) Uani 1 1 d . . . . .
O13 O -0.19531(18) -0.1132(4) 0.05128(19) 0.0283(9) Uani 1 1 d . . . . .
N1 N 0.1396(2) 0.0446(4) 0.3738(2) 0.0160(9) Uani 1 1 d . . . . .
N2 N 0.0846(2) -0.1121(4) 0.3970(2) 0.0234(10) Uani 1 1 d . . . . .
H2C H 0.0704 -0.1918 0.4022 0.028 Uiso 1 1 calc R U . . .
N3 N 0.1313(2) 0.4950(4) 0.1545(2) 0.0186(10) Uani 1 1 d . . . . .
N4 N 0.0893(2) 0.5700(4) 0.2243(2) 0.0226(10) Uani 1 1 d . . . . .
H4C H 0.0753 0.6255 0.2483 0.027 Uiso 1 1 calc R U . . .
C1 C 0.1329(3) -0.0878(5) 0.3749(3) 0.0203(11) Uani 1 1 d . . . . .
H1 H 0.1578 -0.1524 0.3623 0.024 Uiso 1 1 calc R U . . .
C2 C 0.0606(3) 0.0058(5) 0.4103(3) 0.0178(11) Uani 1 1 d . . . . .
H2 H 0.0264 0.0161 0.4272 0.021 Uiso 1 1 calc R U . . .
C3 C 0.0943(2) 0.1047(5) 0.3952(3) 0.0191(11) Uani 1 1 d . . . . .
H3 H 0.0881 0.1976 0.3985 0.023 Uiso 1 1 calc R U . . .
C4 C 0.1853(3) 0.1164(5) 0.3495(3) 0.0217(12) Uani 1 1 d . . . . .
H4A H 0.2106 0.1838 0.3856 0.026 Uiso 1 1 calc R U . . .
H4B H 0.1582 0.1642 0.3050 0.026 Uiso 1 1 calc R U . . .
C5 C 0.2349(3) 0.0254(5) 0.3367(3) 0.0216(12) Uani 1 1 d . . . . .
H5A H 0.2101 -0.0387 0.2985 0.026 Uiso 1 1 calc R U . . .
H5B H 0.2608 -0.0258 0.3804 0.026 Uiso 1 1 calc R U . . .
C6 C 0.2827(3) 0.1070(5) 0.3157(3) 0.0231(12) Uani 1 1 d . . . . .
H6A H 0.2562 0.1618 0.2737 0.028 Uiso 1 1 calc R U . . .
H6B H 0.3085 0.1684 0.3550 0.028 Uiso 1 1 calc R U . . .
C7 C 0.3315(3) 0.0209(5) 0.2989(3) 0.0288(14) Uani 1 1 d . . . . .
H7A H 0.3572 -0.0356 0.3404 0.035 Uiso 1 1 calc R U . . .
H7B H 0.3058 -0.0386 0.2586 0.035 Uiso 1 1 calc R U . . .
C8 C 0.3801(3) 0.1034(6) 0.2801(3) 0.0296(13) Uani 1 1 d . . . . .
H8A H 0.3540 0.1656 0.2414 0.035 Uiso 1 1 calc R U . . .
H8B H 0.4080 0.1575 0.3219 0.035 Uiso 1 1 calc R U . . .
C9 C 0.4258(3) 0.0215(6) 0.2571(3) 0.0347(15) Uani 1 1 d . . . . .
H9A H 0.3982 -0.0250 0.2123 0.042 Uiso 1 1 calc R U . . .
H9B H 0.4484 -0.0471 0.2935 0.042 Uiso 1 1 calc R U . . .
C10 C 0.4791(3) 0.1042(6) 0.2458(3) 0.0304(13) Uani 1 1 d . . . . .
H10A H 0.4568 0.1767 0.2119 0.037 Uiso 1 1 calc R U . . .
H10B H 0.5087 0.1457 0.2914 0.037 Uiso 1 1 calc R U . . .
C11 C 0.5221(3) 0.0238(6) 0.2178(4) 0.0367(15) Uani 1 1 d . . . . .
H11A H 0.4934 -0.0095 0.1698 0.044 Uiso 1 1 calc R U . . .
H11B H 0.5405 -0.0545 0.2489 0.044 Uiso 1 1 calc R U . . .
C12 C 0.5801(3) 0.1032(6) 0.2141(3) 0.0306(13) Uani 1 1 d . . . . .
H12A H 0.5617 0.1818 0.1833 0.037 Uiso 1 1 calc R U . . .
H12B H 0.6090 0.1360 0.2622 0.037 Uiso 1 1 calc R U . . .
C13 C 0.6231(3) 0.0233(6) 0.1857(3) 0.0335(14) Uani 1 1 d . . . . .
H13A H 0.6417 -0.0551 0.2167 0.040 Uiso 1 1 calc R U . . .
H13B H 0.5941 -0.0099 0.1377 0.040 Uiso 1 1 calc R U . . .
C14 C 0.6806(3) 0.1026(6) 0.1817(3) 0.0376(15) Uani 1 1 d . . . . .
H14A H 0.7087 0.1391 0.2292 0.045 Uiso 1 1 calc R U . . .
H14B H 0.6622 0.1784 0.1487 0.045 Uiso 1 1 calc R U . . .
C15 C 0.7244(4) 0.0158(7) 0.1560(4) 0.0497(19) Uani 1 1 d . . . . .
H15A H 0.7610 0.0699 0.1541 0.060 Uiso 1 1 calc R U . . .
H15B H 0.7433 -0.0584 0.1890 0.060 Uiso 1 1 calc R U . . .
H15C H 0.6969 -0.0192 0.1086 0.060 Uiso 1 1 calc R U . . .
C16 C 0.1162(2) 0.6043(5) 0.1801(3) 0.0191(11) Uani 1 1 d . . . . .
H16 H 0.1234 0.6929 0.1686 0.023 Uiso 1 1 calc R U . . .
C17 C 0.0867(3) 0.4325(5) 0.2269(3) 0.0215(12) Uani 1 1 d . . . . .
H17 H 0.0696 0.3814 0.2545 0.026 Uiso 1 1 calc R U . . .
C18 C 0.1129(3) 0.3849(5) 0.1831(3) 0.0247(12) Uani 1 1 d . . . . .
H18 H 0.1179 0.2939 0.1735 0.030 Uiso 1 1 calc R U . . .
C19 C 0.1590(3) 0.4889(6) 0.1003(3) 0.0292(14) Uani 1 1 d . . . . .
H19A H 0.1582 0.5794 0.0810 0.035 Uiso 1 1 calc R U . . .
H19B H 0.1298 0.4313 0.0608 0.035 Uiso 1 1 calc R U . . .
C20 C 0.2298(3) 0.4361(6) 0.1283(3) 0.0245(12) Uani 1 1 d . . . . .
H20A H 0.2324 0.3512 0.1536 0.029 Uiso 1 1 calc R U . . .
H20B H 0.2605 0.5005 0.1627 0.029 Uiso 1 1 calc R U . . .
C21 C 0.2523(3) 0.4134(6) 0.0688(3) 0.0287(13) Uani 1 1 d . . . . .
H21A H 0.2212 0.3493 0.0346 0.034 Uiso 1 1 calc R U . . .
H21B H 0.2490 0.4985 0.0435 0.034 Uiso 1 1 calc R U . . .
C22 C 0.3230(3) 0.3610(6) 0.0936(3) 0.0324(14) Uani 1 1 d . . . . .
H22A H 0.3255 0.2721 0.1153 0.039 Uiso 1 1 calc R U . . .
H22B H 0.3538 0.4211 0.1307 0.039 Uiso 1 1 calc R U . . .
C23 C 0.3468(3) 0.3494(7) 0.0332(3) 0.0355(15) Uani 1 1 d . . . . .
H23A H 0.3170 0.2861 -0.0027 0.043 Uiso 1 1 calc R U . . .
H23B H 0.3418 0.4374 0.0100 0.043 Uiso 1 1 calc R U . . .
C24 C 0.4185(3) 0.3035(7) 0.0564(3) 0.0403(16) Uani 1 1 d . . . . .
H24A H 0.4226 0.2116 0.0750 0.048 Uiso 1 1 calc R U . . .
H24B H 0.4480 0.3613 0.0956 0.048 Uiso 1 1 calc R U . . .
C25 C 0.4424(3) 0.3064(7) -0.0029(3) 0.0368(15) Uani 1 1 d . . . . .
H25A H 0.4130 0.2477 -0.0417 0.044 Uiso 1 1 calc R U . . .
H25B H 0.4374 0.3981 -0.0219 0.044 Uiso 1 1 calc R U . . .
C26 C 0.5143(3) 0.2629(8) 0.0190(3) 0.0465(18) Uani 1 1 d . . . . .
H26A H 0.5189 0.1692 0.0353 0.056 Uiso 1 1 calc R U . . .
H26B H 0.5437 0.3181 0.0595 0.056 Uiso 1 1 calc R U . . .
C27 C 0.5383(3) 0.2739(7) -0.0404(3) 0.0387(16) Uani 1 1 d . . . . .
H27A H 0.5348 0.3681 -0.0557 0.046 Uiso 1 1 calc R U . . .
H27B H 0.5078 0.2211 -0.0815 0.046 Uiso 1 1 calc R U . . .
C28 C 0.6104(3) 0.2263(8) -0.0204(3) 0.0488(19) Uani 1 1 d . . . . .
H28A H 0.6409 0.2767 0.0216 0.059 Uiso 1 1 calc R U . . .
H28B H 0.6136 0.1310 -0.0072 0.059 Uiso 1 1 calc R U . . .
C29 C 0.6331(3) 0.2434(7) -0.0792(3) 0.0405(16) Uani 1 1 d . . . . .
H29A H 0.6319 0.3393 -0.0908 0.049 Uiso 1 1 calc R U . . .
H29B H 0.6012 0.1968 -0.1219 0.049 Uiso 1 1 calc R U . . .
C30 C 0.7034(3) 0.1906(8) -0.0613(4) 0.058(2) Uani 1 1 d . . . . .
H30A H 0.7150 0.2049 -0.1017 0.070 Uiso 1 1 calc R U . . .
H30B H 0.7355 0.2378 -0.0197 0.070 Uiso 1 1 calc R U . . .
H30C H 0.7048 0.0952 -0.0509 0.070 Uiso 1 1 calc R U . . .

loop_
 _atom_site_aniso_label
 _atom_site_aniso_U_11
 _atom_site_aniso_U_22
 _atom_site_aniso_U_33
 _atom_site_aniso_U_23
 _atom_site_aniso_U_13
 _atom_site_aniso_U_12
Mo1 0.0144(2) 0.0156(2) 0.0148(2) -0.00051(16) 0.00815(19) -0.00103(17)
Mo2 0.0158(2) 0.0105(2) 0.0158(2) -0.00097(16) 0.00892(18) -0.00015(17)
Mo3 0.0163(2) 0.0136(2) 0.0132(2) -0.00053(16) 0.00914(19) -0.00026(17)
Mo4 0.0215(3) 0.0119(2) 0.0179(2) 0.00069(16) 0.0094(2) 0.00037(18)
O1 0.028(2) 0.0194(19) 0.026(2) 0.0003(15) 0.0145(16) 0.0007(16)
O2 0.0211(19) 0.023(2) 0.0219(19) 0.0004(15) 0.0139(15) 0.0040(16)
O3 0.023(2) 0.0195(19) 0.027(2) 0.0007(15) 0.0131(16) 0.0010(16)
O4 0.0194(18) 0.023(2) 0.0210(18) 0.0056(15) 0.0108(15) 0.0034(16)
O5 0.0220(19) 0.0172(18) 0.0144(17) 0.0007(14) 0.0087(14) 0.0015(16)
O6 0.039(2) 0.021(2) 0.030(2) 0.0034(16) 0.0225(18) 0.0040(18)
O7 0.0184(19) 0.030(2) 0.0206(19) -0.0064(16) 0.0122(15) -0.0045(17)
O8 0.0202(19) 0.023(2) 0.0183(18) 0.0020(14) 0.0100(15) 0.0051(16)
O9 0.030(2) 0.0133(18) 0.0241(19) 0.0034(15) 0.0133(16) 0.0001(16)
O10 0.026(2) 0.0205(19) 0.0195(18) -0.0051(15) 0.0122(15) -0.0016(16)
O11 0.0194(18) 0.0155(18) 0.0183(18) -0.0004(14) 0.0103(14) -0.0021(15)
O12 0.033(2) 0.021(2) 0.0244(19) -0.0040(15) 0.0205(17) -0.0020(17)
O13 0.027(2) 0.025(2) 0.031(2) 0.0021(17) 0.0096(17) -0.0048(17)
N1 0.021(2) 0.014(2) 0.017(2) -0.0011(17) 0.0122(18) -0.0046(18)
N2 0.034(3) 0.020(2) 0.022(2) 0.0006(19) 0.016(2) -0.001(2)
N3 0.023(2) 0.020(2) 0.018(2) 0.0026(17) 0.014(2) 0.0058(19)
N4 0.032(3) 0.019(2) 0.022(2) -0.0043(19) 0.016(2) 0.005(2)
C1 0.030(3) 0.011(2) 0.025(3) -0.001(2) 0.016(2) 0.001(2)
C2 0.018(3) 0.019(3) 0.022(3) 0.000(2) 0.013(2) 0.001(2)
C3 0.023(3) 0.017(3) 0.023(3) -0.001(2) 0.014(2) 0.005(2)
C4 0.026(3) 0.018(3) 0.023(3) -0.003(2) 0.011(2) -0.005(2)
C5 0.022(3) 0.025(3) 0.021(3) -0.001(2) 0.012(2) -0.001(2)
C6 0.021(3) 0.028(3) 0.021(3) 0.002(2) 0.010(2) 0.002(2)
C7 0.026(3) 0.035(3) 0.027(3) 0.004(2) 0.012(3) 0.005(3)
C8 0.024(3) 0.042(4) 0.026(3) -0.005(3) 0.014(2) -0.004(3)
C9 0.027(3) 0.041(4) 0.040(4) -0.003(3) 0.018(3) -0.005(3)
C10 0.022(3) 0.043(4) 0.029(3) -0.003(3) 0.013(2) -0.007(3)
C11 0.031(4) 0.042(4) 0.044(4) -0.003(3) 0.022(3) -0.002(3)
C12 0.028(3) 0.036(3) 0.031(3) 0.001(3) 0.016(3) -0.001(3)
C13 0.027(3) 0.043(4) 0.037(4) 0.006(3) 0.020(3) 0.002(3)
C14 0.029(3) 0.050(4) 0.039(4) 0.010(3) 0.020(3) 0.004(3)
C15 0.036(4) 0.062(5) 0.062(5) 0.011(4) 0.031(4) 0.006(3)
C16 0.021(3) 0.014(3) 0.023(3) 0.002(2) 0.011(2) 0.000(2)
C17 0.025(3) 0.021(3) 0.023(3) 0.007(2) 0.014(2) 0.003(2)
C18 0.028(3) 0.022(3) 0.023(3) 0.003(2) 0.008(2) 0.001(2)
C19 0.030(3) 0.044(4) 0.021(3) 0.003(2) 0.019(3) 0.006(3)
C20 0.029(3) 0.026(3) 0.023(3) 0.001(2) 0.015(2) 0.000(3)
C21 0.025(3) 0.041(4) 0.023(3) 0.002(3) 0.012(2) 0.003(3)
C22 0.024(3) 0.053(4) 0.026(3) 0.002(3) 0.016(2) 0.009(3)
C23 0.026(3) 0.058(4) 0.026(3) 0.004(3) 0.013(2) 0.012(3)
C24 0.028(3) 0.066(5) 0.031(3) 0.007(3) 0.016(3) 0.018(3)
C25 0.022(3) 0.061(4) 0.029(3) 0.003(3) 0.013(3) 0.008(3)
C26 0.029(4) 0.083(5) 0.032(3) 0.009(3) 0.017(3) 0.018(4)
C27 0.025(3) 0.058(4) 0.031(3) 0.004(3) 0.009(3) 0.013(3)
C28 0.035(4) 0.076(5) 0.036(4) 0.010(3) 0.015(3) 0.021(4)
C29 0.031(4) 0.060(5) 0.039(4) 0.003(3) 0.023(3) 0.014(3)
C30 0.043(4) 0.082(6) 0.059(5) 0.015(4) 0.029(4) 0.022(4)

#==============================================================================
_computing_data_collection
                                             'CrystalClear (Rigaku Inc., 2007)'
_computing_cell_refinement                         CrystalClear
_computing_data_reduction                          CrystalClear
_computing_structure_solution
                                      'SHELXS Version 2013/1 (Sheldrick, 2008)'
_computing_structure_refinement
                                      'SHELXL Version 2014/7 (Sheldrick, 2008)'
_computing_publication_material
                                        'CrystalStructure 4.1.1 (Rigaku, 2015)'
_computing_molecular_graphics                     'CrystalStructure 4.1.1'

#==============================================================================
# MOLECULAR GEOMETRY

_geom_special_details
;
 All esds (except the esd in the dihedral angle between two l.s. planes)
 are estimated using the full covariance matrix.  The cell esds are taken
 into account individually in the estimation of esds in distances, angles
 and torsion angles; correlations between esds in cell parameters are only
 used when they are defined by crystal symmetry.  An approximate (isotropic)
 treatment of cell esds is used for estimating esds involving l.s. planes.
;

loop_
 _geom_bond_atom_site_label_1
 _geom_bond_atom_site_label_2
 _geom_bond_distance
 _geom_bond_site_symmetry_2
 _geom_bond_publ_flag
Mo1 O1 1.682(3) . ?
Mo1 O3 1.696(3) . ?
Mo1 O5 1.935(3) . ?
Mo1 O2 1.951(3) . ?
Mo1 O4 2.346(3) . ?
Mo1 O7 2.350(3) 3 ?
Mo2 O6 1.694(4) . ?
Mo2 O4 1.761(3) . ?
Mo2 O8 1.794(3) . ?
Mo2 O7 1.828(3) . ?
Mo3 O9 1.705(3) . ?
Mo3 O10 1.706(3) . ?
Mo3 O5 1.902(3) . ?
Mo3 O11 1.981(3) . ?
Mo3 O8 2.305(3) . ?
Mo3 O7 2.310(3) 3 ?
Mo4 O13 1.691(4) . ?
Mo4 O12 1.715(3) . ?
Mo4 O11 1.841(3) . ?
Mo4 O2 1.843(3) 3 ?
O2 Mo4 1.843(3) 3 ?
O7 Mo3 2.310(3) 3 ?
O7 Mo1 2.350(3) 3 ?
N1 C1 1.340(6) . ?
N1 C3 1.379(6) . ?
N1 C4 1.476(6) . ?
N2 C1 1.333(6) . ?
N2 C2 1.369(6) . ?
N2 H2C 0.8800 . ?
N3 C16 1.318(6) . ?
N3 C18 1.389(6) . ?
N3 C19 1.479(6) . ?
N4 C16 1.322(6) . ?
N4 C17 1.384(7) . ?
N4 H4C 0.8800 . ?
C1 H1 0.9500 . ?
C2 C3 1.348(7) . ?
C2 H2 0.9500 . ?
C3 H3 0.9500 . ?
C4 C5 1.522(7) . ?
C4 H4A 0.9900 . ?
C4 H4B 0.9900 . ?
C5 C6 1.526(7) . ?
C5 H5A 0.9900 . ?
C5 H5B 0.9900 . ?
C6 C7 1.520(7) . ?
C6 H6A 0.9900 . ?
C6 H6B 0.9900 . ?
C7 C8 1.518(7) . ?
C7 H7A 0.9900 . ?
C7 H7B 0.9900 . ?
C8 C9 1.515(8) . ?
C8 H8A 0.9900 . ?
C8 H8B 0.9900 . ?
C9 C10 1.524(7) . ?
C9 H9A 0.9900 . ?
C9 H9B 0.9900 . ?
C10 C11 1.522(8) . ?
C10 H10A 0.9900 . ?
C10 H10B 0.9900 . ?
C11 C12 1.525(8) . ?
C11 H11A 0.9900 . ?
C11 H11B 0.9900 . ?
C12 C13 1.524(8) . ?
C12 H12A 0.9900 . ?
C12 H12B 0.9900 . ?
C13 C14 1.519(8) . ?
C13 H13A 0.9900 . ?
C13 H13B 0.9900 . ?
C14 C15 1.542(8) . ?
C14 H14A 0.9900 . ?
C14 H14B 0.9900 . ?
C15 H15A 0.9800 . ?
C15 H15B 0.9800 . ?
C15 H15C 0.9800 . ?
C16 H16 0.9500 . ?
C17 C18 1.345(7) . ?
C17 H17 0.9500 . ?
C18 H18 0.9500 . ?
C19 C20 1.508(7) . ?
C19 H19A 0.9900 . ?
C19 H19B 0.9900 . ?
C20 C21 1.518(7) . ?
C20 H20A 0.9900 . ?
C20 H20B 0.9900 . ?
C21 C22 1.509(7) . ?
C21 H21A 0.9900 . ?
C21 H21B 0.9900 . ?
C22 C23 1.542(7) . ?
C22 H22A 0.9900 . ?
C22 H22B 0.9900 . ?
C23 C24 1.510(7) . ?
C23 H23A 0.9900 . ?
C23 H23B 0.9900 . ?
C24 C25 1.519(7) . ?
C24 H24A 0.9900 . ?
C24 H24B 0.9900 . ?
C25 C26 1.510(7) . ?
C25 H25A 0.9900 . ?
C25 H25B 0.9900 . ?
C26 C27 1.525(7) . ?
C26 H26A 0.9900 . ?
C26 H26B 0.9900 . ?
C27 C28 1.532(8) . ?
C27 H27A 0.9900 . ?
C27 H27B 0.9900 . ?
C28 C29 1.500(8) . ?
C28 H28A 0.9900 . ?
C28 H28B 0.9900 . ?
C29 C30 1.519(8) . ?
C29 H29A 0.9900 . ?
C29 H29B 0.9900 . ?
C30 H30A 0.9800 . ?
C30 H30B 0.9800 . ?
C30 H30C 0.9800 . ?

loop_
 _geom_angle_atom_site_label_1
 _geom_angle_atom_site_label_2
 _geom_angle_atom_site_label_3
 _geom_angle
 _geom_angle_site_symmetry_1
 _geom_angle_site_symmetry_3
 _geom_angle_publ_flag
O1 Mo1 O3 104.77(17) . . ?
O1 Mo1 O5 100.56(15) . . ?
O3 Mo1 O5 99.32(15) . . ?
O1 Mo1 O2 101.97(15) . . ?
O3 Mo1 O2 96.62(15) . . ?
O5 Mo1 O2 147.96(14) . . ?
O1 Mo1 O4 88.84(14) . . ?
O3 Mo1 O4 166.29(14) . . ?
O5 Mo1 O4 79.39(12) . . ?
O2 Mo1 O4 78.60(13) . . ?
O1 Mo1 O7 160.59(15) . 3 ?
O3 Mo1 O7 94.21(15) . 3 ?
O5 Mo1 O7 71.88(12) . 3 ?
O2 Mo1 O7 79.41(12) . 3 ?
O4 Mo1 O7 72.35(12) . 3 ?
O6 Mo2 O4 107.99(17) . . ?
O6 Mo2 O8 106.03(16) . . ?
O4 Mo2 O8 110.25(15) . . ?
O6 Mo2 O7 107.53(17) . . ?
O4 Mo2 O7 111.32(15) . . ?
O8 Mo2 O7 113.40(15) . . ?
O9 Mo3 O10 105.62(16) . . ?
O9 Mo3 O5 100.02(15) . . ?
O10 Mo3 O5 100.48(15) . . ?
O9 Mo3 O11 94.75(15) . . ?
O10 Mo3 O11 99.90(15) . . ?
O5 Mo3 O11 150.50(13) . . ?
O9 Mo3 O8 166.50(14) . . ?
O10 Mo3 O8 86.70(14) . . ?
O5 Mo3 O8 82.73(13) . . ?
O11 Mo3 O8 77.39(13) . . ?
O9 Mo3 O7 95.31(14) . 3 ?
O10 Mo3 O7 158.97(15) . 3 ?
O5 Mo3 O7 73.37(12) . 3 ?
O11 Mo3 O7 79.99(12) . 3 ?
O8 Mo3 O7 72.68(12) . 3 ?
O13 Mo4 O12 107.56(18) . . ?
O13 Mo4 O11 105.44(16) . . ?
O12 Mo4 O11 107.09(15) . . ?
O13 Mo4 O2 109.03(16) . 3 ?
O12 Mo4 O2 108.02(16) . 3 ?
O11 Mo4 O2 119.19(14) . 3 ?
Mo4 O2 Mo1 134.9(2) 3 . ?
Mo2 O4 Mo1 124.26(17) . . ?
Mo3 O5 Mo1 118.88(17) . . ?
Mo2 O7 Mo3 137.43(17) . 3 ?
Mo2 O7 Mo1 130.70(17) . 3 ?
Mo3 O7 Mo1 90.29(11) 3 3 ?
Mo2 O8 Mo3 123.14(16) . . ?
Mo4 O11 Mo3 128.76(18) . . ?
C1 N1 C3 109.2(4) . . ?
C1 N1 C4 125.9(4) . . ?
C3 N1 C4 124.8(4) . . ?
C1 N2 C2 109.5(4) . . ?
C1 N2 H2C 125.2 . . ?
C2 N2 H2C 125.2 . . ?
C16 N3 C18 109.2(4) . . ?
C16 N3 C19 125.9(4) . . ?
C18 N3 C19 124.8(4) . . ?
C16 N4 C17 108.9(4) . . ?
C16 N4 H4C 125.5 . . ?
C17 N4 H4C 125.5 . . ?
N2 C1 N1 107.2(4) . . ?
N2 C1 H1 126.4 . . ?
N1 C1 H1 126.4 . . ?
C3 C2 N2 107.3(5) . . ?
C3 C2 H2 126.3 . . ?
N2 C2 H2 126.3 . . ?
C2 C3 N1 106.7(4) . . ?
C2 C3 H3 126.7 . . ?
N1 C3 H3 126.7 . . ?
N1 C4 C5 113.3(4) . . ?
N1 C4 H4A 108.9 . . ?
C5 C4 H4A 108.9 . . ?
N1 C4 H4B 108.9 . . ?
C5 C4 H4B 108.9 . . ?
H4A C4 H4B 107.7 . . ?
C4 C5 C6 110.4(4) . . ?
C4 C5 H5A 109.6 . . ?
C6 C5 H5A 109.6 . . ?
C4 C5 H5B 109.6 . . ?
C6 C5 H5B 109.6 . . ?
H5A C5 H5B 108.1 . . ?
C7 C6 C5 112.8(4) . . ?
C7 C6 H6A 109.0 . . ?
C5 C6 H6A 109.0 . . ?
C7 C6 H6B 109.0 . . ?
C5 C6 H6B 109.0 . . ?
H6A C6 H6B 107.8 . . ?
C8 C7 C6 112.3(4) . . ?
C8 C7 H7A 109.1 . . ?
C6 C7 H7A 109.1 . . ?
C8 C7 H7B 109.1 . . ?
C6 C7 H7B 109.1 . . ?
H7A C7 H7B 107.9 . . ?
C9 C8 C7 114.0(5) . . ?
C9 C8 H8A 108.8 . . ?
C7 C8 H8A 108.8 . . ?
C9 C8 H8B 108.8 . . ?
C7 C8 H8B 108.8 . . ?
H8A C8 H8B 107.6 . . ?
C8 C9 C10 113.5(5) . . ?
C8 C9 H9A 108.9 . . ?
C10 C9 H9A 108.9 . . ?
C8 C9 H9B 108.9 . . ?
C10 C9 H9B 108.9 . . ?
H9A C9 H9B 107.7 . . ?
C11 C10 C9 113.6(5) . . ?
C11 C10 H10A 108.8 . . ?
C9 C10 H10A 108.8 . . ?
C11 C10 H10B 108.8 . . ?
C9 C10 H10B 108.8 . . ?
H10A C10 H10B 107.7 . . ?
C10 C11 C12 113.4(5) . . ?
C10 C11 H11A 108.9 . . ?
C12 C11 H11A 108.9 . . ?
C10 C11 H11B 108.9 . . ?
C12 C11 H11B 108.9 . . ?
H11A C11 H11B 107.7 . . ?
C13 C12 C11 113.6(5) . . ?
C13 C12 H12A 108.8 . . ?
C11 C12 H12A 108.8 . . ?
C13 C12 H12B 108.8 . . ?
C11 C12 H12B 108.8 . . ?
H12A C12 H12B 107.7 . . ?
C14 C13 C12 113.6(5) . . ?
C14 C13 H13A 108.8 . . ?
C12 C13 H13A 108.8 . . ?
C14 C13 H13B 108.8 . . ?
C12 C13 H13B 108.8 . . ?
H13A C13 H13B 107.7 . . ?
C13 C14 C15 111.6(5) . . ?
C13 C14 H14A 109.3 . . ?
C15 C14 H14A 109.3 . . ?
C13 C14 H14B 109.3 . . ?
C15 C14 H14B 109.3 . . ?
H14A C14 H14B 108.0 . . ?
C14 C15 H15A 109.5 . . ?
C14 C15 H15B 109.5 . . ?
H15A C15 H15B 109.5 . . ?
C14 C15 H15C 109.5 . . ?
H15A C15 H15C 109.5 . . ?
H15B C15 H15C 109.5 . . ?
N3 C16 N4 108.5(4) . . ?
N3 C16 H16 125.8 . . ?
N4 C16 H16 125.8 . . ?
C18 C17 N4 107.0(4) . . ?
C18 C17 H17 126.5 . . ?
N4 C17 H17 126.5 . . ?
C17 C18 N3 106.4(5) . . ?
C17 C18 H18 126.8 . . ?
N3 C18 H18 126.8 . . ?
N3 C19 C20 113.6(4) . . ?
N3 C19 H19A 108.8 . . ?
C20 C19 H19A 108.8 . . ?
N3 C19 H19B 108.8 . . ?
C20 C19 H19B 108.8 . . ?
H19A C19 H19B 107.7 . . ?
C19 C20 C21 111.4(4) . . ?
C19 C20 H20A 109.3 . . ?
C21 C20 H20A 109.3 . . ?
C19 C20 H20B 109.3 . . ?
C21 C20 H20B 109.3 . . ?
H20A C20 H20B 108.0 . . ?
C22 C21 C20 113.9(4) . . ?
C22 C21 H21A 108.8 . . ?
C20 C21 H21A 108.8 . . ?
C22 C21 H21B 108.8 . . ?
C20 C21 H21B 108.8 . . ?
H21A C21 H21B 107.7 . . ?
C21 C22 C23 113.0(4) . . ?
C21 C22 H22A 109.0 . . ?
C23 C22 H22A 109.0 . . ?
C21 C22 H22B 109.0 . . ?
C23 C22 H22B 109.0 . . ?
H22A C22 H22B 107.8 . . ?
C24 C23 C22 114.7(5) . . ?
C24 C23 H23A 108.6 . . ?
C22 C23 H23A 108.6 . . ?
C24 C23 H23B 108.6 . . ?
C22 C23 H23B 108.6 . . ?
H23A C23 H23B 107.6 . . ?
C23 C24 C25 113.3(5) . . ?
C23 C24 H24A 108.9 . . ?
C25 C24 H24A 108.9 . . ?
C23 C24 H24B 108.9 . . ?
C25 C24 H24B 108.9 . . ?
H24A C24 H24B 107.7 . . ?
C26 C25 C24 114.5(5) . . ?
C26 C25 H25A 108.6 . . ?
C24 C25 H25A 108.6 . . ?
C26 C25 H25B 108.6 . . ?
C24 C25 H25B 108.6 . . ?
H25A C25 H25B 107.6 . . ?
C25 C26 C27 113.5(5) . . ?
C25 C26 H26A 108.9 . . ?
C27 C26 H26A 108.9 . . ?
C25 C26 H26B 108.9 . . ?
C27 C26 H26B 108.9 . . ?
H26A C26 H26B 107.7 . . ?
C26 C27 C28 114.6(5) . . ?
C26 C27 H27A 108.6 . . ?
C28 C27 H27A 108.6 . . ?
C26 C27 H27B 108.6 . . ?
C28 C27 H27B 108.6 . . ?
H27A C27 H27B 107.6 . . ?
C29 C28 C27 113.1(5) . . ?
C29 C28 H28A 108.9 . . ?
C27 C28 H28A 108.9 . . ?
C29 C28 H28B 108.9 . . ?
C27 C28 H28B 108.9 . . ?
H28A C28 H28B 107.8 . . ?
C28 C29 C30 113.7(5) . . ?
C28 C29 H29A 108.8 . . ?
C30 C29 H29A 108.8 . . ?
C28 C29 H29B 108.8 . . ?
C30 C29 H29B 108.8 . . ?
H29A C29 H29B 107.7 . . ?
C29 C30 H30A 109.5 . . ?
C29 C30 H30B 109.5 . . ?
H30A C30 H30B 109.5 . . ?
C29 C30 H30C 109.5 . . ?
H30A C30 H30C 109.5 . . ?
H30B C30 H30C 109.5 . . ?

loop_
 _geom_torsion_atom_site_label_1
 _geom_torsion_atom_site_label_2
 _geom_torsion_atom_site_label_3
 _geom_torsion_atom_site_label_4
 _geom_torsion
 _geom_torsion_site_symmetry_1
 _geom_torsion_site_symmetry_2
 _geom_torsion_site_symmetry_3
 _geom_torsion_site_symmetry_4
 _geom_torsion_publ_flag
O6 Mo2 O4 Mo1 155.64(19) . . . . ?
O8 Mo2 O4 Mo1 40.2(2) . . . . ?
O7 Mo2 O4 Mo1 -86.5(2) . . . . ?
O6 Mo2 O7 Mo3 81.4(3) . . . 3 ?
O4 Mo2 O7 Mo3 -36.7(3) . . . 3 ?
O8 Mo2 O7 Mo3 -161.7(2) . . . 3 ?
O6 Mo2 O7 Mo1 -79.7(3) . . . 3 ?
O4 Mo2 O7 Mo1 162.2(2) . . . 3 ?
O8 Mo2 O7 Mo1 37.2(3) . . . 3 ?
O6 Mo2 O8 Mo3 -153.3(2) . . . . ?
O4 Mo2 O8 Mo3 -36.6(2) . . . . ?
O7 Mo2 O8 Mo3 88.9(2) . . . . ?
O13 Mo4 O11 Mo3 -166.8(2) . . . . ?
O12 Mo4 O11 Mo3 -52.4(2) . . . . ?
O2 Mo4 O11 Mo3 70.4(3) 3 . . . ?
C2 N2 C1 N1 -0.2(6) . . . . ?
C3 N1 C1 N2 -0.4(5) . . . . ?
C4 N1 C1 N2 -177.1(4) . . . . ?
C1 N2 C2 C3 0.8(6) . . . . ?
N2 C2 C3 N1 -1.0(6) . . . . ?
C1 N1 C3 C2 0.9(5) . . . . ?
C4 N1 C3 C2 177.6(4) . . . . ?
C1 N1 C4 C5 -10.0(7) . . . . ?
C3 N1 C4 C5 173.9(4) . . . . ?
N1 C4 C5 C6 -176.9(4) . . . . ?
C4 C5 C6 C7 -177.3(4) . . . . ?
C5 C6 C7 C8 -178.4(4) . . . . ?
C6 C7 C8 C9 -175.3(5) . . . . ?
C7 C8 C9 C10 -174.0(5) . . . . ?
C8 C9 C10 C11 -176.1(5) . . . . ?
C9 C10 C11 C12 -173.8(5) . . . . ?
C10 C11 C12 C13 -179.7(5) . . . . ?
C11 C12 C13 C14 179.7(5) . . . . ?
C12 C13 C14 C15 177.3(5) . . . . ?
C18 N3 C16 N4 0.5(6) . . . . ?
C19 N3 C16 N4 176.6(5) . . . . ?
C17 N4 C16 N3 -0.4(6) . . . . ?
C16 N4 C17 C18 0.1(5) . . . . ?
N4 C17 C18 N3 0.1(6) . . . . ?
C16 N3 C18 C17 -0.4(6) . . . . ?
C19 N3 C18 C17 -176.5(5) . . . . ?
C16 N3 C19 C20 113.1(6) . . . . ?
C18 N3 C19 C20 -71.4(7) . . . . ?
N3 C19 C20 C21 171.9(5) . . . . ?
C19 C20 C21 C22 179.8(5) . . . . ?
C20 C21 C22 C23 -175.3(5) . . . . ?
C21 C22 C23 C24 177.2(6) . . . . ?
C22 C23 C24 C25 -174.3(6) . . . . ?
C23 C24 C25 C26 179.2(6) . . . . ?
C24 C25 C26 C27 -176.8(6) . . . . ?
C25 C26 C27 C28 -178.2(6) . . . . ?
C26 C27 C28 C29 -177.8(6) . . . . ?
C27 C28 C29 C30 -177.2(6) . . . . ?

#==============================================================================
loop_
_geom_hbond_atom_site_label_D
_geom_hbond_atom_site_label_H
_geom_hbond_atom_site_label_A
_geom_hbond_site_symmetry_D
_geom_hbond_site_symmetry_H
_geom_hbond_site_symmetry_A
_geom_hbond_distance_DA
_geom_hbond_distance_DH
_geom_hbond_distance_HA
_geom_hbond_angle_DHA
_geom_hbond_publ_flag
N2 H2C O8 . . 2_545 2.887(6) 0.880 2.029 164.7 no
N2 H2C O12 . . 2_545 2.992(6) 0.880 2.569 110.4 no
N4 H4C O9 . . 1_565 2.925(5) 0.880 2.412 117.5 no
N4 H4C O10 . . 2_555 2.950(7) 0.880 2.333 127.3 no

#==============================================================================
# Additional structures and associated data_? identifiers
# should be added at this point if there is more than one 
# structure analysis in the CIF.

_shelx_res_file
;

    shelxl.res created by SHELXL-2014/7

TITL C12imiMo8-1
CELL  0.71075 21.85910 10.03950 20.68340 90.00000 114.30700 90.00000
ZERR  2 0.00440 0.00180 0.00410 0.00000 0.00210 0.00000
LATT 1
SYMM    -X, .50+Y, .50-Z
SFAC C H N MO O
UNIT 120 232 16 16 52
L.S. 20
FMAP 2
PLAN 50
WPDB -2
HTAB
BOND $H
CONF
LIST 4
TEMP -179.8
ACTA
SIZE 0.200 0.200 0.200
WGHT    0.058400
FVAR       0.52120
MO1   4    0.156197    0.000251    0.113565    11.00000    0.01444    0.01561 =
         0.01483   -0.00051    0.00815   -0.00103
MO2   4    0.002623    0.179980    0.008048    11.00000    0.01581    0.01053 =
         0.01581   -0.00097    0.00892   -0.00015
MO3   4    0.034816   -0.001744    0.169587    11.00000    0.01627    0.01364 =
         0.01321   -0.00053    0.00914   -0.00026
MO4   4   -0.134991    0.001890    0.063873    11.00000    0.02151    0.01191 =
         0.01785    0.00069    0.00944    0.00037
O1    5    0.223014    0.101268    0.134229    11.00000    0.02765    0.01943 =
         0.02631    0.00029    0.01449    0.00069
O2    5    0.146899   -0.073118    0.022613    11.00000    0.02111    0.02292 =
         0.02185    0.00041    0.01385    0.00398
O3    5    0.187213   -0.139611    0.162068    11.00000    0.02332    0.01945 =
         0.02693    0.00075    0.01309    0.00101
O4    5    0.089813    0.163249    0.034519    11.00000    0.01936    0.02323 =
         0.02103    0.00560    0.01077    0.00337
O5    5    0.113300    0.079715    0.169442    11.00000    0.02197    0.01723 =
         0.01443    0.00066    0.00869    0.00154
O6    5   -0.018542    0.339897   -0.017588    11.00000    0.03945    0.02118 =
         0.03047    0.00336    0.02250    0.00399
O7    5   -0.044274    0.073414   -0.067970    11.00000    0.01842    0.02983 =
         0.02061   -0.00644    0.01218   -0.00449
O8    5   -0.018474    0.153228    0.082193    11.00000    0.02017    0.02282 =
         0.01831    0.00205    0.00999    0.00512
O9    5    0.069171   -0.141453    0.217760    11.00000    0.02954    0.01332 =
         0.02414    0.00336    0.01335    0.00009
O10   5    0.018386    0.101962    0.225831    11.00000    0.02583    0.02046 =
         0.01953   -0.00507    0.01224   -0.00156
O11   5   -0.055216   -0.081497    0.118095    11.00000    0.01936    0.01551 =
         0.01832   -0.00037    0.01026   -0.00214
O12   5   -0.145638    0.127182    0.114643    11.00000    0.03255    0.02145 =
         0.02437   -0.00402    0.02053   -0.00201
O13   5   -0.195314   -0.113173    0.051278    11.00000    0.02681    0.02513 =
         0.03075    0.00206    0.00961   -0.00479
N1    3    0.139627    0.044647    0.373757    11.00000    0.02127    0.01429 =
         0.01669   -0.00105    0.01225   -0.00457
N2    3    0.084631   -0.112146    0.397006    11.00000    0.03354    0.01968 =
         0.02198    0.00059    0.01648   -0.00081
AFIX  43
H2C   2    0.070441   -0.191763    0.402231    11.00000   -1.20000
AFIX   0
N3    3    0.131292    0.494978    0.154491    11.00000    0.02330    0.02009 =
         0.01803    0.00262    0.01427    0.00582
N4    3    0.089295    0.569981    0.224340    11.00000    0.03183    0.01913 =
         0.02174   -0.00427    0.01605    0.00530
AFIX  43
H4C   2    0.075318    0.625545    0.248286    11.00000   -1.20000
AFIX   0
C1    1    0.132856   -0.087838    0.374891    11.00000    0.02965    0.01060 =
         0.02481   -0.00079    0.01551    0.00135
AFIX  43
H1    2    0.157782   -0.152442    0.362284    11.00000   -1.20000
AFIX   0
C2    1    0.060578    0.005804    0.410338    11.00000    0.01761    0.01856 =
         0.02170    0.00044    0.01259    0.00141
AFIX  43
H2    2    0.026443    0.016101    0.427170    11.00000   -1.20000
AFIX   0
C3    1    0.094314    0.104656    0.395152    11.00000    0.02266    0.01668 =
         0.02307   -0.00132    0.01447    0.00488
AFIX  43
H3    2    0.088070    0.197621    0.398538    11.00000   -1.20000
AFIX   0
C4    1    0.185274    0.116409    0.349524    11.00000    0.02552    0.01802 =
         0.02254   -0.00288    0.01080   -0.00522
AFIX  23
H4A   2    0.210584    0.183791    0.385576    11.00000   -1.20000
H4B   2    0.158216    0.164166    0.304974    11.00000   -1.20000
AFIX   0
C5    1    0.234857    0.025404    0.336713    11.00000    0.02176    0.02500 =
         0.02148   -0.00138    0.01238   -0.00100
AFIX  23
H5A   2    0.210104   -0.038685    0.298469    11.00000   -1.20000
H5B   2    0.260836   -0.025802    0.380374    11.00000   -1.20000
AFIX   0
C6    1    0.282733    0.107031    0.315744    11.00000    0.02135    0.02834 =
         0.02107    0.00223    0.01029    0.00199
AFIX  23
H6A   2    0.256216    0.161778    0.273671    11.00000   -1.20000
H6B   2    0.308519    0.168362    0.355033    11.00000   -1.20000
AFIX   0
C7    1    0.331478    0.020929    0.298874    11.00000    0.02610    0.03453 =
         0.02692    0.00437    0.01208    0.00543
AFIX  23
H7A   2    0.357199   -0.035646    0.340447    11.00000   -1.20000
H7B   2    0.305814   -0.038569    0.258624    11.00000   -1.20000
AFIX   0
C8    1    0.380073    0.103396    0.280107    11.00000    0.02434    0.04249 =
         0.02551   -0.00522    0.01388   -0.00365
AFIX  23
H8A   2    0.354050    0.165594    0.241375    11.00000   -1.20000
H8B   2    0.408037    0.157459    0.321885    11.00000   -1.20000
AFIX   0
C9    1    0.425836    0.021543    0.257071    11.00000    0.02706    0.04121 =
         0.04034   -0.00289    0.01846   -0.00533
AFIX  23
H9A   2    0.398247   -0.025041    0.212303    11.00000   -1.20000
H9B   2    0.448359   -0.047074    0.293537    11.00000   -1.20000
AFIX   0
C10   1    0.479140    0.104157    0.245783    11.00000    0.02185    0.04299 =
         0.02885   -0.00306    0.01284   -0.00665
AFIX  23
H10A  2    0.456753    0.176729    0.211852    11.00000   -1.20000
H10B  2    0.508692    0.145691    0.291417    11.00000   -1.20000
AFIX   0
C11   1    0.522136    0.023781    0.217807    11.00000    0.03055    0.04195 =
         0.04404   -0.00300    0.02189   -0.00184
AFIX  23
H11A  2    0.493355   -0.009473    0.169761    11.00000   -1.20000
H11B  2    0.540540   -0.054525    0.248881    11.00000   -1.20000
AFIX   0
C12   1    0.580104    0.103190    0.214105    11.00000    0.02789    0.03639 =
         0.03145    0.00110    0.01613   -0.00098
AFIX  23
H12A  2    0.561686    0.181805    0.183284    11.00000   -1.20000
H12B  2    0.608998    0.136003    0.262211    11.00000   -1.20000
AFIX   0
C13   1    0.623065    0.023322    0.185705    11.00000    0.02664    0.04323 =
         0.03745    0.00607    0.01998    0.00240
AFIX  23
H13A  2    0.641660   -0.055061    0.216658    11.00000   -1.20000
H13B  2    0.594131   -0.009852    0.137691    11.00000   -1.20000
AFIX   0
C14   1    0.680595    0.102593    0.181702    11.00000    0.02940    0.05016 =
         0.03938    0.01040    0.02025    0.00381
AFIX  23
H14A  2    0.708739    0.139133    0.229183    11.00000   -1.20000
H14B  2    0.662239    0.178430    0.148749    11.00000   -1.20000
AFIX   0
C15   1    0.724436    0.015823    0.156018    11.00000    0.03606    0.06191 =
         0.06193    0.01077    0.03108    0.00593
AFIX  33
H15A  2    0.760951    0.069926    0.154060    11.00000   -1.20000
H15B  2    0.743342   -0.058432    0.189028    11.00000   -1.20000
H15C  2    0.696872   -0.019160    0.108646    11.00000   -1.20000
AFIX   0
C16   1    0.116186    0.604318    0.180052    11.00000    0.02128    0.01432 =
         0.02326    0.00234    0.01087   -0.00018
AFIX  43
H16   2    0.123409    0.692871    0.168576    11.00000   -1.20000
AFIX   0
C17   1    0.086692    0.432460    0.226939    11.00000    0.02492    0.02125 =
         0.02292    0.00750    0.01441    0.00267
AFIX  43
H17   2    0.069613    0.381356    0.254490    11.00000   -1.20000
AFIX   0
C18   1    0.112921    0.384857    0.183071    11.00000    0.02756    0.02187 =
         0.02267    0.00300    0.00822    0.00145
AFIX  43
H18   2    0.117897    0.293893    0.173524    11.00000   -1.20000
AFIX   0
C19   1    0.159034    0.488880    0.100322    11.00000    0.03043    0.04393 =
         0.02122    0.00283    0.01868    0.00604
AFIX  23
H19A  2    0.158181    0.579387    0.080967    11.00000   -1.20000
H19B  2    0.129823    0.431277    0.060825    11.00000   -1.20000
AFIX   0
C20   1    0.229836    0.436133    0.128305    11.00000    0.02910    0.02584 =
         0.02280    0.00057    0.01498   -0.00043
AFIX  23
H20A  2    0.232389    0.351151    0.153570    11.00000   -1.20000
H20B  2    0.260509    0.500474    0.162694    11.00000   -1.20000
AFIX   0
C21   1    0.252292    0.413364    0.068832    11.00000    0.02465    0.04058 =
         0.02281    0.00172    0.01180    0.00338
AFIX  23
H21A  2    0.221226    0.349300    0.034610    11.00000   -1.20000
H21B  2    0.248990    0.498529    0.043479    11.00000   -1.20000
AFIX   0
C22   1    0.323026    0.361000    0.093609    11.00000    0.02400    0.05338 =
         0.02587    0.00244    0.01632    0.00879
AFIX  23
H22A  2    0.325516    0.272146    0.115312    11.00000   -1.20000
H22B  2    0.353805    0.421126    0.130672    11.00000   -1.20000
AFIX   0
C23   1    0.346771    0.349399    0.033227    11.00000    0.02563    0.05798 =
         0.02550    0.00425    0.01329    0.01184
AFIX  23
H23A  2    0.316987    0.286147   -0.002653    11.00000   -1.20000
H23B  2    0.341784    0.437412    0.010012    11.00000   -1.20000
AFIX   0
C24   1    0.418464    0.303545    0.056422    11.00000    0.02768    0.06592 =
         0.03108    0.00750    0.01601    0.01799
AFIX  23
H24A  2    0.422572    0.211552    0.074987    11.00000   -1.20000
H24B  2    0.448048    0.361330    0.095605    11.00000   -1.20000
AFIX   0
C25   1    0.442379    0.306369   -0.002897    11.00000    0.02229    0.06067 =
         0.02937    0.00253    0.01252    0.00838
AFIX  23
H25A  2    0.412951    0.247746   -0.041736    11.00000   -1.20000
H25B  2    0.437360    0.398140   -0.021915    11.00000   -1.20000
AFIX   0
C26   1    0.514299    0.262855    0.018968    11.00000    0.02913    0.08308 =
         0.03178    0.00920    0.01710    0.01842
AFIX  23
H26A  2    0.518884    0.169206    0.035290    11.00000   -1.20000
H26B  2    0.543667    0.318144    0.059506    11.00000   -1.20000
AFIX   0
C27   1    0.538255    0.273886   -0.040421    11.00000    0.02456    0.05783 =
         0.03121    0.00435    0.00883    0.01317
AFIX  23
H27A  2    0.534779    0.368100   -0.055663    11.00000   -1.20000
H27B  2    0.507774    0.221105   -0.081480    11.00000   -1.20000
AFIX   0
C28   1    0.610381    0.226340   -0.020433    11.00000    0.03516    0.07642 =
         0.03560    0.01015    0.01534    0.02092
AFIX  23
H28A  2    0.640922    0.276716    0.021625    11.00000   -1.20000
H28B  2    0.613643    0.131007   -0.007186    11.00000   -1.20000
AFIX   0
C29   1    0.633123    0.243445   -0.079157    11.00000    0.03101    0.06016 =
         0.03860    0.00299    0.02256    0.01439
AFIX  23
H29A  2    0.631867    0.339349   -0.090774    11.00000   -1.20000
H29B  2    0.601191    0.196848   -0.121919    11.00000   -1.20000
AFIX   0
C30   1    0.703359    0.190649   -0.061305    11.00000    0.04262    0.08159 =
         0.05856    0.01526    0.02860    0.02193
AFIX  33
H30A  2    0.715011    0.204903   -0.101746    11.00000   -1.20000
H30B  2    0.735542    0.237818   -0.019737    11.00000   -1.20000
H30C  2    0.704834    0.095168   -0.050915    11.00000   -1.20000
AFIX   0
HKLF 4

REM  C12imiMo8-1
REM R1 =  0.0422 for    6001 Fo > 4sig(Fo)  and  0.0579 for all    7550 data
REM    460 parameters refined using      0 restraints

END

WGHT      0.0584      0.0000

REM Instructions for potential hydrogen bonds
EQIV $1 -x, y-1/2, -z+1/2
HTAB N2 O8_$1
HTAB N2 O12_$1
EQIV $2 x, y+1, z
HTAB N4 O9_$2
EQIV $3 -x, y+1/2, -z+1/2
HTAB N4 O10_$3
HTAB N4 O12_$3
HTAB C1 O12_$1
HTAB C2 O6_$1
EQIV $4 x, -y+1/2, z+1/2
HTAB C2 O6_$4
HTAB C3 O11_$3
HTAB C4 O13_$3
HTAB C16 O3_$2
HTAB C16 O9_$2
HTAB C18 O5
HTAB C20 O1

REM Highest difference peak  0.984,  deepest hole -1.204,  1-sigma level  0.190
Q1    1   0.7441  0.0071  0.1158  11.00000  0.05    0.98
Q2    1   0.1918 -0.1898  0.2869  11.00000  0.05    0.86
Q3    1   0.1908  0.1857  0.2817  11.00000  0.05    0.75
Q4    1   0.3271  0.0020  0.2184  11.00000  0.05    0.74
Q5    1   0.1051  0.3118  0.2715  11.00000  0.05    0.74
Q6    1   0.2206  0.5041 -0.0488  11.00000  0.05    0.69
Q7    1   0.1755 -0.1760  0.1125  11.00000  0.05    0.68
Q8    1   0.2487  0.0637  0.3575  11.00000  0.05    0.66
Q9    1   0.1039  0.6884  0.2659  11.00000  0.05    0.66
Q10   1   0.2347 -0.0419  0.3393  11.00000  0.05    0.65
Q11   1   0.1725 -0.0032  0.2917  11.00000  0.05    0.63
Q12   1   0.7171 -0.1044  0.1145  11.00000  0.05    0.62
Q13   1   0.2537  0.1487  0.3193  11.00000  0.05    0.61
Q14   1   0.2106  0.0714  0.3317  11.00000  0.05    0.60
Q15   1   0.2401 -0.1370  0.3209  11.00000  0.05    0.59
Q16   1   0.7286  0.1723  0.1244  11.00000  0.05    0.59
Q17   1   0.2579  0.0424  0.3232  11.00000  0.05    0.59
Q18   1   0.0574  0.0015  0.3465  11.00000  0.05    0.59
Q19   1   0.2915  0.1874  0.0504  11.00000  0.05    0.58
Q20   1   0.1868 -0.2392  0.3349  11.00000  0.05    0.57
Q21   1   0.6992  0.3300  0.0840  11.00000  0.05    0.55
Q22   1   0.7497  0.1497  0.1816  11.00000  0.05    0.55
Q23   1   0.0207 -0.1771  0.1771  11.00000  0.05    0.55
Q24   1   0.2697  0.3091  0.3749  11.00000  0.05    0.55
Q25   1   0.3137 -0.0687  0.2968  11.00000  0.05    0.54
Q26   1   0.1915 -0.0753  0.3477  11.00000  0.05    0.54
Q27   1   0.7883  0.1377  0.1743  11.00000  0.05    0.54
Q28   1   0.1713  0.1771  0.1082  11.00000  0.05    0.54
Q29   1  -0.1279  0.1811  0.0520  11.00000  0.05    0.54
Q30   1   0.8044  0.2023  0.2257  11.00000  0.05    0.54
Q31   1   0.1888  0.2387  0.3422  11.00000  0.05    0.53
Q32   1   0.7870  0.0483  0.1671  11.00000  0.05    0.53
Q33   1   0.3160  0.0679  0.3008  11.00000  0.05    0.52
Q34   1   0.2276  0.0591  0.2114  11.00000  0.05    0.52
Q35   1   0.7077  0.2666  0.1505  11.00000  0.05    0.51
Q36   1   0.2789 -0.1545  0.3028  11.00000  0.05    0.51
Q37   1   0.7707  0.1459  0.2384  11.00000  0.05    0.51
Q38   1   0.1989 -0.0878  0.2721  11.00000  0.05    0.51
Q39   1   0.0189  0.1715  0.1724  11.00000  0.05    0.51
Q40   1   0.1516  0.6572  0.2712  11.00000  0.05    0.50
Q41   1   0.7013  0.2116  0.2384  11.00000  0.05    0.50
Q42   1   0.1942  0.2662  0.3013  11.00000  0.05    0.50
Q43   1   0.1400 -0.0229  0.3760  11.00000  0.05    0.50
Q44   1   0.1780 -0.0648  0.2988  11.00000  0.05    0.49
Q45   1   0.7795  0.0040  0.0946  11.00000  0.05    0.49
Q46   1   0.1499 -0.1641  0.3075  11.00000  0.05    0.49
Q47   1   0.2285  0.0289  0.2629  11.00000  0.05    0.49
Q48   1   0.7577  0.0112  0.2167  11.00000  0.05    0.49
Q49   1   0.7676  0.2294  0.1502  11.00000  0.05    0.49
Q50   1   0.1554  0.3391  0.3102  11.00000  0.05    0.49
;

_shelx_res_checksum   91718

_shelx_hkl_file
;
   1   0   1   -8.39    8.61
  -1   0  -1  -11.60    6.55
  -1   0  -1   -7.02    8.92
  -2   0   1   11.51   11.54
  -2   0   1    6.52   11.67
   2   0  -1   -8.28    9.58
   1   0  -2   -2.55    5.25
   1   0  -2   -9.39    7.60
   0   1   0   10.04   17.04
   0  -1   0   41.75   16.04
   0  -1   0   -7.48    9.31
   0  -1   0  -12.35   10.47
   2   0   0   -9.74    9.66
  -2   0   0  -18.79    8.25
   0   0  -2   -8.38    8.90
   1  -1   0   48.01   21.46
   1  -1   0   24.59   15.15
   2   0   1   10.50   13.70
  -2   0  -1  -11.34   15.74
   2   0   1  -13.73   11.93
  -2   0  -1   17.27    9.60
   1  -1   114586.44  191.07
  -1   1  -114384.59  193.79
  -1  -1  -114372.86  177.18
   1   1   113437.84  167.61
   1   1   114298.61  177.18
   1   0   2 1214.69   59.00
   1   0   2 1307.13   70.50
  -1   0  -2 1294.66   58.89
  -1   0  -2 1224.45   52.66
   2  -1  -111297.55  148.82
  -2  -1   110833.35  133.66
   2   1  -111028.72  136.30
  -2  -1   110827.58  143.28
   2  -1  -110989.95  146.06
  -2   1   110701.54  154.59
  -3   0   1   21.26   16.14
  -3   0   1   -0.59   20.83
   3   0  -1    8.00   20.43
   3   0  -1    7.85    6.62
   1   1  -2  188.54   37.61
   1  -1  -2  137.30   33.85
   1   1  -2  118.32   33.04
   1  -1  -2  136.92   21.85
  -1  -1   2  123.65   45.98
  -1  -1   2  113.98   35.51
  -1   1   2  124.39   29.77
  -2  -1   0    5.57   10.21
   2  -1   0   18.74   15.82
   2   1   0   14.66   11.19
   2  -1   0   19.83   13.50
  -2   1   0   19.47   19.21
   3   0  -2  301.27   67.98
   3   0  -2  237.31   29.46
  -3   0   2  252.53   20.98
  -3   0   2  241.60   35.72
   0  -1  -2  254.10   15.09
   0   1  -2  316.66   22.06
   0  -1  -2  254.31   21.77
   0   1   2  259.24   63.68
   0  -1  -2  256.18   18.46
   0  -1   2  288.64   37.20
   0   1  -2  252.67  120.39
   0  -1   2  304.26   38.39
  -1   0   3   15.24   16.52
   1   0  -3    9.24    6.55
  -1   0   3   14.92   11.05
  -1   0   3   11.03   10.98
  -2   0   3    8.70   11.96
   2   0  -3   32.21   14.33
  -2   0   3   -1.29   22.70
   2   0  -3   17.93   17.08
   2   1  -2   27.65   15.08
  -2   1   2    7.81   11.80
   2  -1  -2   15.68   15.43
   2  -1  -2   10.56    8.30
  -2  -1   2   -9.74   11.84
  -2  -1   2   -2.34   19.49
  -2   1   2    5.82    7.02
   2   1  -2   13.89   14.81
  -3   0   0  948.35   52.92
   3   0   0  929.50   49.07
  -3   0   0 1099.82   50.07
   3   0   0 1033.05   64.23
   0   0   3    0.27    5.11
   0   0   3  -20.31   21.54
   0   0  -3    4.45    8.39
   0   0  -3   11.02   11.93
   2   1   1    9.50   14.00
  -2   1  -1    6.82   10.51
  -2  -1  -1   13.35   15.80
   2  -1   1  -11.24   28.12
   2  -1   1    9.69   11.60
  -2   1  -1   18.74   23.68
   2   1   1   -7.54    9.94
  -2  -1  -1    2.93    5.46
  -1   1  -2  163.43   58.26
   1  -1   2  209.92   61.98
  -1   1  -2  249.70   71.88
   1  -1   2  228.24   72.94
   1   1   2  104.71   49.53
  -1  -1  -2  158.74   47.72
  -1  -1  -2  172.38   41.60
   1   1   2  187.59   37.02
  -3   0   3   -3.16   19.98
   3   0  -3   -8.78   16.54
   3   0  -3   -5.70   17.42
  -3   0   3   -5.32   21.90
   3   1  -1  314.45   32.71
  -3   1   1  200.86  101.53
  -3   1   1  357.25   39.05
   3   1  -1  296.30   24.31
   3  -1  -1  274.67   58.32
   3  -1  -1  309.72   46.75
  -3  -1   1  257.49   64.10
  -3  -1   1  277.46   18.74
   2   0   2  100.50   42.41
   2   0   2  120.35   42.89
  -2   0  -2  163.78   58.62
  -2   0  -2  107.79   73.18
   3  -1  -2   39.28   20.70
  -3   1   2   23.31   28.79
  -3  -1   2   21.55   30.41
   3   1  -2   19.50   18.33
   3  -1  -2   34.84   15.78
  -3  -1   2   24.43   18.04
  -3   1   2   -9.62   21.77
   3   1  -2   36.74   14.81
   1  -1  -3  221.67   73.46
   1   1  -3  206.54   62.83
   1   1  -3  234.37   75.27
  -1  -1   3  241.74   86.85
  -1   1   3  140.80   57.17
  -1  -1   3  167.81   53.47
   1  -1  -3  153.03   18.33
  -3   0  -1  -37.43   27.41
   3   0   1  -39.28   23.75
  -3   0  -1   -9.37   19.83
   3   0   1   -6.03   19.95
  -2  -1   3  333.84   77.16
  -2   1   3  381.06   44.37
   2   1  -3  310.38   28.83
  -2  -1   3  364.07   94.20
   2  -1  -3  377.10   41.31
   2  -1  -3  333.12   72.91
  -2   1   3  385.77   76.28
   2   1  -3  322.93   24.87
  -3   1   0  898.05  114.41
   3   1   0  833.37   59.82
  -3  -1   0  726.53   45.82
   3  -1   0  897.41   80.22
   3  -1   0  839.50   45.39
  -4   0   2   16.98   10.72
   4   0  -2   29.43   18.67
  -4   0   2   26.53   12.73
   4   0  -2  -44.71   23.30
   4   0  -1   -6.52   18.05
   4   0  -1  -13.49   26.26
  -4   0   1  -22.33   40.47
  -4   0   1  -16.25   18.42
   1   0   3   -9.56   14.00
  -1   0  -3  -30.39   18.42
  -1   0  -3   14.16   12.97
   1   0   3  -40.33   24.25
   0   1   3  996.79   53.25
   0   1  -3 1014.84   50.88
   0  -1   3  956.55   60.14
   0  -1   3 1048.99   63.63
   0   1  -3 1055.96   59.57
   0  -1  -3 1096.04   84.88
   2   0  -4 3369.30  141.97
  -2   0   4 3271.21  160.86
  -2   0   4 3417.70  142.41
   2   0  -4 3758.78  164.32
   3  -1  -3 1997.24   89.80
  -3   1   3 1742.00   85.23
   3   1  -3 1997.74   91.23
  -3   1   3 1868.74   93.44
  -3  -1   3 1921.19   93.99
   3   1  -3 1936.91   93.41
   3  -1  -3 1888.55   84.28
  -3  -1   3 1883.37  141.58
  -1   0   4 8102.19  113.32
  -1   0   4 8352.13  131.10
   1   0  -4 8405.07  139.53
  -1   0   4 7972.21  111.50
  -4   0   3   -4.65   29.65
  -4   0   3   14.91   12.41
   4   0  -3   -7.55   23.35
   4   0  -3    6.74   12.21
   0  -2   088721.93  189.87
  -2   1  -2  666.59   92.26
  -2  -1  -2  595.01   44.83
  -2   1  -2  596.34   65.94
   2  -1   2  646.79   40.21
   2  -1   2  638.21   64.39
   2   1   2  619.35   92.95
   2   1   2  624.19   49.58
  -2  -1  -2  603.21   44.32
   4   0   0 4302.52   67.64
   4   0   0 4563.04   84.41
  -4   0   0 3863.29  164.84
  -3   0   4 1672.71  124.17
   3   0  -4 1710.21   82.28
  -3   0   4 1606.30  106.97
   3   0  -4 1686.61   87.20
  -3   1  -1 4727.44  120.13
   3   1   1 4802.45  107.16
  -3  -1  -1 4858.08   71.01
   3  -1   1 4814.52  140.40
  -3   1  -1 4923.15   87.43
   3  -1   1 5262.34  125.04
  -3  -1  -1 4689.57   79.55
   3   1   1 4880.13  110.72
   1  -2   040616.09  505.29
   1  -2   040445.39  510.64
  -1  -2   039695.61  486.94
  -1  -2   041051.89  507.50
  -1   2   040267.89  504.28
   1  -2   040287.41  498.45
  -1  -2   040739.94  508.48
   0  -2   1 4291.81   95.53
   0   2   1 4033.60  185.41
   0  -2  -1 4292.60   98.98
   0   2  -1 4107.31  173.16
   0   2  -1 4530.20  132.84
   0  -2   1 4581.23  125.70
   0  -2  -1 4431.15   50.91
   0   2   1 4585.88   83.26
  -1  -2   1 1357.34   73.77
   1   2  -1 1276.79   74.45
  -1   2   1 1367.71   78.12
   1   2  -1 1352.13   76.60
  -1  -2   1 1339.37   64.96
   1  -2  -1 1290.34   64.12
   1  -2  -1 1317.37   80.48
  -1   2   1 1255.57   93.13
   4   1  -2   40.36   38.75
  -4  -1   2   25.12   13.87
  -4  -1   2   30.98   38.74
   4  -1  -2   11.48   21.38
  -4   1   2    5.77   14.74
   4  -1  -2   32.25   17.35
   4   1  -2   34.31   16.02
  -4   1   2   49.85   25.23
  -4  -1   1  398.29   25.27
  -4   1   1  501.07   62.47
   4  -1  -1  416.99   55.57
  -4   1   1  477.74   65.42
   4  -1  -1  411.53   47.77
   4   1  -1  483.54  104.86
  -4  -1   1  303.58   62.49
  -1   1  -3  289.28  108.11
   1  -1   3  362.67   98.44
  -1  -1  -3  357.23   91.57
   1  -1   3  499.60  156.05
  -1   1  -3  452.41   99.18
   1   1   3  391.02   77.39
   1   1   3  372.97  103.31
  -1  -1  -3  352.67   27.11
   0   0  -4 2413.61  121.18
   0   0   4 2532.27  124.45
   0   0  -4 2507.90  137.03
   0   0   4 2475.27  138.22
  -3   0  -2  460.79  125.37
   3   0   2  422.86   98.85
   3   0   2  480.68  100.86
  -3   0  -2  464.79   67.68
  -1  -2  -1 7443.69  112.72
   1  -2   1 7982.60  137.54
  -1  -2  -1 7760.01  108.96
   1   2   1 7552.67  127.68
   1  -2   1 7606.50  148.98
  -1   2  -1 7660.29  136.13
  -1   2  -1 7057.53  126.10
  -1  -2  -1 7892.52  162.26
  -2   1   4  196.12  116.91
  -2  -1   4  181.56   48.51
  -2  -1   4  144.60   58.49
   2   1  -4  211.18   95.92
   2  -1  -4   95.95   85.23
  -2  -1   4  111.58   44.45
   2  -1  -4  196.45   51.62
   2   2  -1  890.38   67.10
   2   2  -1  892.05  230.17
  -2  -2   1  786.11   66.60
  -2  -2   1  888.15  115.53
  -2   2   1  842.55  117.19
  -2   2   1  842.38  115.09
   2  -2  -1  879.76  125.00
   2  -2  -1  726.41  105.24
   2   0   3    6.24   18.58
  -2   0  -3   41.75   25.85
   2   0   3   38.78   27.11
  -2   0  -3   49.87   33.24
   1   1  -4 1224.13   82.96
  -1  -1   4 1226.77   95.45
   1  -1  -4 1170.79   74.98
  -1   1   4 1202.65  178.96
  -1  -1   4 1304.99  185.73
   1   1  -4 1179.92   75.44
  -1   2   2  516.37  106.55
   1  -2  -2  533.59   86.37
  -1  -2   2  460.69   97.83
   1   2  -2  564.63  182.71
   1  -2  -2  431.81  164.83
  -1  -2   2  597.65  182.04
   1   2  -2  562.10   58.37
  -1   2   2  492.39  175.38
   4  -1  -3 4242.99   66.78
  -4  -1   3 4096.04  170.27
  -4  -1   3 4326.23   99.65
   4   1  -3 4342.78   88.83
   4  -1  -3 4289.57  179.04
  -4   1   3 4325.08   82.74
  -4   1   3 3978.98  174.08
   4   1  -3 4300.45  188.66
  -2  -2   0 3655.41  170.91
  -2   2   0 3571.30  198.24
   2   2   0 3622.24  164.05
  -2  -2   0 3443.90  143.23
  -2  -2   0 3307.87  214.62
   2  -2   0 3606.89  154.98
   2  -2   0 3333.38  173.15
   2  -2   0 3634.70  178.57
  -4  -1   0   59.78   42.56
   4   1   0  100.62   55.69
   4  -1   0  225.40   97.14
   4  -1   0  112.04   50.89
  -4   1   0   93.46   78.86
   4  -1   0  175.63   59.93
  -4   0   4 7678.69  210.52
  -4   0   4 7116.11  176.38
   4   0  -4 7940.98  182.16
   4   0  -4 7707.40  131.41
   0   2   222997.35  299.87
   0  -2  -223449.58  298.03
   0  -2   221954.08  345.55
   0  -2   223591.62  312.01
   0   2  -223984.06  327.44
   0   2  -222837.61  304.72
   0  -2  -223460.51  302.62
   0   2   222493.16  287.13
   3   1  -4  163.75   73.39
  -3   1   4  125.09   76.54
   3  -1  -4   91.06   45.01
  -3  -1   4   97.53   75.06
   3   1  -4   47.04   41.93
  -3   1   4   56.20   54.20
   3  -1  -4  111.27   54.63
  -3  -1   4   60.38   42.02
   4   0   1   87.14   46.47
  -4   0  -1   64.54   28.35
   4   0   1   53.65   73.60
  -4   0  -1   36.22   56.92
   2  -2  -2 1997.75  149.60
  -2  -2   2 2106.31  155.10
  -2   2   2 2034.58  104.07
  -2   2   2 2107.02  122.72
  -2  -2   2 2184.70  216.59
   2   2  -2 2187.34  120.24
  -2  -2   2 2251.58  175.39
   2  -2  -2 2040.93   95.84
   5   0  -2 9182.98  135.06
  -5   0   2 9618.64  140.20
   5   0  -2 9713.77  180.01
  -5   0   2 9459.16  176.70
   5   0  -1   46.69   41.55
   5   0  -1   30.60   49.19
  -5   0   1   45.41   26.40
  -5   0   1   55.26   45.69
   0   1  -4  568.97  128.88
   0   1   4  426.97  120.49
   0  -1  -4  338.49  131.71
   0  -1   4  559.32  177.77
   0  -1   4  368.12   74.98
   0   1  -4  365.99  112.67
  -5   0   3  163.31   92.92
   5   0  -3   75.50   58.85
  -5   0   3   75.42   46.10
   5   0  -3    6.71   30.23
  -1   0  -412479.20  305.86
   1   0   412307.25  211.77
  -1   0  -411810.06  166.38
   1   0   412697.44  185.14
   2  -2   1 3691.78  164.63
  -2   2  -1 3214.37  183.74
  -2   2  -1 3422.73  238.93
   2   2   1 3350.37  193.71
  -2  -2  -1 3091.17  152.79
   2  -2   1 3486.77  185.57
  -2  -2  -1 3130.51  129.93
   3  -1   2  200.64   63.41
  -3  -1  -2  232.54   43.16
   3   1   2  202.03   58.83
  -3   1  -2  243.71   86.80
   3   1   2  218.88  113.75
  -3  -1  -2  243.08  102.61
  -3   1  -2  220.43   68.06
   3  -1   2  218.19  103.55
  -1   2  -2  774.19  124.90
   1  -2   2  943.98  126.91
  -1  -2  -2  665.20   94.09
   1   2   2  702.34  124.12
  -1  -2  -2  669.48  189.26
  -1   2  -2  912.54   85.30
   1  -2   2  672.03  125.91
  -2   1  -310172.84  224.29
   2  -1   3 9095.34  203.27
   2   1   3 9300.74  149.69
  -2  -1  -3 9829.67  186.67
   2   1   3 9890.88  159.12
  -2  -1  -3 8977.20  153.81
   2  -1   3 9704.06  144.93
  -2   1  -3 9747.26  158.77
  -2   0   5  186.71   82.49
   2   0  -5  131.21   74.86
  -2   0   5  182.72  105.48
   3  -2  -1   99.33   54.06
   3  -2  -1   88.07   41.62
   3   2  -1  117.41   67.42
  -3  -2   1  125.87   37.01
  -3  -2   1  243.97  104.96
   3   2  -1  120.31   43.01
  -3   2   1  150.59   91.72
  -3   2   1  126.77   56.42
   3   0  -5  143.17   68.03
   3   0  -5   46.88   39.21
  -3   0   5  138.22   72.70
  -3   0   5  181.56   99.57
   4  -1  -4  220.88   55.82
  -4  -1   4  365.21   99.46
   4   1  -4  195.39  121.92
   4   1  -4  290.98   71.72
  -4  -1   4  391.32   79.45
  -4   1   4  196.55  104.98
   4  -1  -4  206.76  137.03
  -4   1   4  172.91   84.64
   3   2  -218043.81  242.70
  -3  -2   218154.49  266.98
  -3  -2   218507.15  255.41
   3  -2  -218886.77  272.29
  -3   2   217785.69  248.69
  -3   2   217452.59  296.08
   3  -2  -219121.97  257.88
   1   2  -3  239.12  107.53
  -1  -2   3  795.60  204.64
  -1   2   3  456.53   95.67
  -1  -2   3  242.37   84.81
   1  -2  -3  506.47   76.01
  -1   2   3  549.48  102.55
   1  -2  -3  587.12  115.33
   1   2  -3  683.27  117.00
   4   1   1 2195.81  120.49
   4  -1   1 2060.27  118.02
  -4   1  -1 2050.86  103.00
  -4   1  -1 2160.32  212.98
   4  -1   1 1613.38   82.10
  -4  -1  -1 2102.59  102.05
  -4  -1  -1 2245.78  136.61
   4   1   1 1859.87   91.01
   1   0  -5   83.76   44.23
  -1   0   5   56.96   45.75
  -1   0   5  171.84   95.17
   1   0  -5   46.75   20.81
  -2   2   3  254.49   93.05
  -2   2   3  233.29   85.75
   2  -2  -3  279.85   89.38
  -2  -2   3  273.16  136.37
  -2  -2   3  217.79   87.29
   2  -2  -3  336.96   57.24
   2   2  -3  167.63  105.30
  -2  -2   3  107.94   49.83
  -5   1   2  215.42   77.85
   5  -1  -2  337.25   71.72
   5   1  -2  139.80   80.02
  -5   1   2  257.27  102.24
   5  -1  -2  266.50   57.64
  -5  -1   2  339.89  121.71
   5   1  -2  154.62   31.92
  -5  -1   2  244.35   32.75
  -3   2   023203.41  306.09
   3   2   024131.88  314.57
  -3  -2   023872.80  427.21
   3  -2   022137.86  308.33
   3  -2   022121.00  294.14
   3  -2   022104.54  292.36
  -3  -2   023498.78  288.44
  -3  -2   023225.07  281.12
   5   0   0 1904.44  117.35
   5   0   0 1925.56  100.76
  -5   0   0 2149.59  222.88
   5   0   0 2010.31  101.31
   5   0  -4 1495.16  128.67
  -5   0   4 1560.51  131.04
  -5   0   4 1519.82  167.66
   5   0  -4 1381.99   74.57
  -5   1   1 9529.40  169.49
  -5   1   1 9760.25  156.86
   5   1  -1 9701.20  135.50
  -5  -1   1 9885.43  198.67
   5   1  -1 9859.50  150.63
  -5  -1   1 9765.70  142.27
   5  -1  -110784.63  199.03
   0  -2  -3 4654.76   71.00
   0   2   3 4444.70  132.23
   0   2  -3 4698.99  168.03
   0  -2  -3 4922.72  105.53
   0  -2  -3 4959.41  135.96
   0  -2   3 5008.07  141.45
   5  -1  -3 2627.39  123.21
  -5  -1   3 2789.22  255.92
  -5  -1   3 2526.33  113.17
   5   1  -3 3123.53  201.60
  -5   1   3 2523.50  196.61
  -5   1   3 2475.74  116.62
   5   1  -3 2532.95  108.55
   1  -1   4  580.89   48.81
   1  -1   4  691.40  100.56
  -1   1  -4  669.08   69.04
  -1  -1  -4  576.21   41.91
  -1   1  -4  610.14   61.77
   1   1   4  566.04   96.27
   1   1   4  584.86  105.90
  -1  -1  -4  647.88  143.73
  -4   0   5   82.25   43.71
   4   0  -5   36.65   41.63
  -4   0   5    2.25   26.58
   4   0  -5  116.57   69.65
   3   0   3   63.33   34.61
   3   0   3   44.41   26.36
  -3   0  -3   20.04   42.55
  -3   0  -3  -10.29   26.03
   3   2  -3  -12.95   42.33
   3  -2  -3   51.62   26.91
  -3   2   3  -13.28   30.16
  -3   2   3   -7.34   33.57
  -3  -2   3   77.71   41.23
   3  -2  -3   27.70   19.36
  -3  -2   3   73.15   83.70
   3   2  -3  124.37   51.84
  -2  -1   5 1811.79  181.85
  -2  -1   5 1916.26  117.17
   2  -1  -5 1869.26   86.86
   2  -1  -5 2255.51  143.16
  -2   1   5 1789.22  192.62
   2   1  -5 1373.35   93.76
  -2  -1   5 1785.03   84.12
  -4   0  -2  367.30  169.34
   4   0   2  587.11  155.79
   4   0   2  510.87   93.99
  -4   0  -2  452.96   43.21
   2  -2   249960.97  624.58
   2  -2   246209.77  582.25
  -2  -2  -247410.64  577.25
  -2   2  -249410.19  619.29
   2   2   246781.98  570.31
   2   2   247249.88  579.48
  -2  -2  -245318.03  559.95
   3  -1  -5 5942.60  116.07
  -3   1   5 5922.41  102.85
  -3   1   5 5833.71  126.95
  -3  -1   5 5672.31  124.28
   3  -1  -5 5641.07  102.93
   3   1  -5 5771.77  114.70
  -3  -1   5 5535.57  218.49
   0   0   5  -15.60   52.88
   0   0  -5  -45.41   38.75
   0   0   5  -17.38   22.44
   0   0  -5    8.73   14.21
   3   2   1  135.16   48.42
  -3  -2  -1   59.56   20.87
   3  -2   1  123.67   66.24
  -3   2  -1  141.01   50.14
  -3  -2  -1  109.94   37.82
   3  -2   1   67.29   54.20
  -3   2  -1  129.10   64.12
  -1   1   5 7350.51  137.37
  -1  -1   5 7415.86  140.05
   1   1  -5 7181.20  173.26
   1   1  -5 7670.85  154.07
  -1   1   5 7498.90   98.27
   5   1   0  394.59   39.33
   5  -1   0  424.17  142.00
  -5   1   0  423.84  164.03
   5  -1   0  257.84   79.66
  -5  -1   0  354.08  141.35
   5   1   0  379.33  105.16
   5   1   0  385.01  120.82
   5  -1   0  348.25  183.40
  -4   2   217291.47  233.12
   4  -2  -218381.15  245.23
  -4   2   218519.40  265.17
   4  -2  -217054.57  233.41
  -4  -2   217959.30  229.81
   4   2  -218216.72  249.89
   4   2  -217537.74  223.35
  -4  -2   217524.12  247.57
  -4   2   1  -30.14   48.50
  -4  -2   1  -39.18   48.40
   4  -2  -1   13.51   16.69
  -4   2   1  -33.36   41.69
   4   2  -1    1.86    3.15
   4   2  -1  -45.81   39.80
   4  -2  -1  -10.01   35.92
   5  -1  -4  759.88  113.89
   5  -1  -4  741.47   60.63
   5   1  -4  690.70  101.80
  -5   1   4  662.58   64.13
   5   1  -4  777.26  139.66
  -5   1   4  690.84  102.53
  -5  -1   4  459.21   56.04
  -5  -1   4  809.86   96.36
  -1   2  -3 8297.79  150.47
   1   2   3 7454.79  116.14
   1  -2   3 8099.92  137.44
  -1   2  -3 7525.69  123.63
   1   2   3 7281.33  105.84
  -1  -2  -3 7492.04  122.50
   1  -2   3 7626.74  170.68
  -1  -2  -3 7828.89  142.52
  -6   0   240986.14  510.09
  -6   0   238983.03  497.19
   6   0  -241281.52  513.11
   6   0  -240317.60  509.72
  -6   0   3  -30.92   60.91
  -6   0   3   -6.32   26.70
   6   0  -3  -14.17   25.80
   6   0  -3  -38.01   49.60
  -4   1   519461.67  296.09
  -4  -1   519269.47  257.72
   4  -1  -520272.35  287.89
  -4   1   518900.79  249.65
   4  -1  -519381.60  252.96
  -4  -1   519509.30  268.36
  -5   0  -1    6.60   16.42
   5   0   1  -29.24   48.55
   5   0   1  -30.78   32.33
  -5   0  -1  -29.33   50.84
  -2  -2   416636.42  233.82
  -2  -2   417088.30  235.13
   2   2  -418056.18  240.70
   2  -2  -417445.06  219.84
  -2  -2   416364.33  238.90
  -2   2   417540.55  225.47
  -2   2   416693.62  233.50
   3   1   3 4828.01  119.23
   3   1   3 4851.73   88.24
  -3   1  -3 5172.37   98.35
   3  -1   3 4816.93  108.52
  -3  -1  -3 5011.13   91.88
  -3  -1  -3 4735.53  127.39
   3  -1   3 4094.84  182.48
  -3   1  -3 4987.89  229.90
  -1   2   431224.68  399.76
   1   2  -430846.29  421.12
  -1  -2   430222.18  392.17
   1  -2  -432556.37  401.79
  -5   0   5  -19.04   43.22
   5   0  -5   -4.57   33.44
  -5   0   5  -16.72   39.60
   5   0  -5  -10.74   37.51
   4  -2  -3  -15.08   29.97
   4   2  -3    7.59   23.89
   4  -2  -3    7.16   15.70
  -4   2   3   -7.80   32.63
  -4  -2   3  -31.23   54.97
  -4  -2   3   -7.42   21.19
  -4   2   3  -11.15   48.84
   4   2  -3    6.87   34.38
   4  -1   2  -26.88   35.43
  -4  -1  -2  -16.50   20.40
   4  -1   2  -34.13   50.91
  -4   1  -2  -42.92   42.44
  -4  -1  -2   -9.78   41.14
   4   1   2   42.02   29.85
  -4   1  -2  -19.70   39.05
   4   1   2   11.90    9.19
   4  -2   019329.70  267.53
  -4  -2   019760.16  312.28
   4  -2   019023.84  277.91
   4  -2   019570.80  264.14
   4   2   020814.51  272.52
  -4   2   019462.71  263.48
   0  -1  -5   14.56   15.96
   0   1   5   21.72   22.18
   0   1   5   14.57   11.58
   0   1  -5   -6.45   31.26
   0  -1  -5   10.62    7.71
   0  -1   5   15.97   17.10
   0   1  -5   24.11   23.48
   0  -1   5  -16.52   55.75
   6   0  -1   -9.39   41.21
   6   0  -1  -10.96   26.20
  -6   0   1  -40.11   58.71
  -3  -2   4 9242.32  141.59
  -3   2   4 9033.61  137.12
   3   2  -4 9142.84  131.31
  -3  -2   4 9237.68  161.18
  -3  -2   4 9585.71  147.84
   3  -2  -4 9694.47  160.40
  -3   2   4 9431.58  147.24
   3  -2  -4 9365.39  153.17
   2   1   4   80.47   57.24
  -2   1  -4   90.87   46.33
  -2  -1  -4   83.49   39.19
   2  -1   4   45.95   49.41
   2  -1   4   37.76   21.32
  -2  -1  -4   87.00   27.12
   2   1   4   19.62   26.45
  -2   1  -4    6.91   35.61
  -6   0   4  107.74   47.24
   6   0  -4  123.29   64.64
  -6   0   4  115.99   54.35
   6   0  -4  140.86   66.21
  -1   0  -5  -12.41   17.40
   1   0   5  -21.56   27.49
  -1   0  -5  -39.49   31.54
   1   0   5  -24.04   42.71
   3   0  -647362.57  587.66
  -3   0   646955.04  589.10
  -3   0   646937.49  583.83
   3   0  -646755.97  583.42
   0   2   439490.95  493.84
   0  -2  -438754.09  467.01
   0  -2   439720.23  503.10
   0   2  -438535.75  510.23
   0  -2  -439090.40  471.59
   0  -2  -440745.84  508.34
   2   0  -6 6348.01  128.38
  -2   0   6 6232.78  118.11
  -2   0   6 5781.95  145.33
  -2   0   6 6503.20  101.03
   6   1  -2   20.05   21.90
  -6  -1   2   -4.02   68.60
   6  -1  -2   -4.72   29.99
  -6   1   2   22.55   40.87
   6  -1  -2   20.13   31.17
  -6   1   2   18.60   40.48
  -6  -1   2    3.91    6.17
   6   1  -2   -3.31   35.48
  -6  -1   3   26.81   19.44
   6  -1  -3   -6.75   35.19
   6  -1  -3   32.81   32.43
   6   1  -3    7.13   18.17
   6   1  -3    2.06   40.28
  -6  -1   3  -29.78   53.30
  -6   1   3   51.56   38.07
  -6   1   3   44.50   36.82
   5  -1   1  -21.81   59.52
  -5  -1  -1   14.72   21.84
  -5   1  -1   41.17   21.70
  -5   1  -1  -12.42   42.97
   5   1   1    1.57   14.76
   5  -1   1   20.64   23.12
   5   1   1   -9.89   31.64
  -5  -1  -1   43.73   17.01
   3   2   218537.79  234.64
  -3  -2  -218550.53  256.12
   3  -2   218958.94  276.91
  -3   2  -218366.50  249.40
   3   2   219719.61  254.59
  -3   2  -219174.67  313.04
  -3  -2  -219350.21  246.07
   2  -2   3  534.94  176.19
  -2   2  -3  475.61   80.83
  -2  -2  -3  452.73   95.57
  -2  -2  -3  473.81   91.34
   2   2   3  291.09   85.80
   2   2   3  444.47   57.14
   2  -2   3  449.12   57.33
  -2   2  -3  393.13  137.28
   5  -1  -5 6785.52  133.56
  -5   1   5 6329.06  144.92
   5  -1  -5 6802.59  120.69
   5   1  -5 6955.28  112.29
   5   1  -5 6985.78  117.71
  -5  -1   5 6747.29  116.69
   0   3   0  -20.32   27.53
   0  -3   0  -25.26   25.44
   0  -3   0   -1.43   51.35
   0  -3   0  -19.25   24.14
   4   2  -4 6162.65  110.54
   4  -2  -4 6074.58  129.39
  -4   2   4 5617.14  103.80
   4  -2  -4 6150.02  111.14
  -4  -2   4 6035.52  132.79
   4   2  -4 6544.44  114.81
  -4  -2   4 5813.93   91.35
  -4   2   4 5889.35   94.52
   6  -1  -146267.32  597.89
   6   1  -149191.58  612.73
   6   1  -148063.58  585.01
   6   1  -148938.26  595.93
   6  -1  -149715.35  622.64
   6  -1  -149815.57  622.03
  -6  -1   146966.04  614.11
  -1   0   6  273.18   71.86
   1   0  -6  302.30   47.45
  -1   0   6  264.71   98.96
   1   0  -6  292.67   39.48
   6   0   024278.04  316.07
   6   0   023086.94  316.26
   4  -2   1  150.44   53.51
  -4   2  -1  117.97   50.08
  -4  -2  -1  107.14   47.70
   4  -2   1  149.75   44.15
  -4   2  -1  131.38   65.67
   4   2   1  110.75   56.33
  -4  -2  -1  100.03   26.20
  -1   3   0 2401.24  134.13
   1  -3   0 2684.24  119.96
  -1  -3   0 2847.16  145.69
  -1  -3   0 2600.15  134.20
   1  -3   0 2330.77  109.71
  -1  -3   0 2468.23  105.65
   1   3   0 2602.02  118.25
   1  -3   0 2528.33  111.70
  -4   0  -3    8.63   11.40
   4   0   3  -31.13   27.24
  -4   0  -3   12.05   17.80
   4   0   3   33.61   21.55
  -5  -2   2 2348.05  126.09
   5  -2  -2 2559.44  112.14
   5   2  -2 2688.59  152.62
  -5  -2   2 2468.00  103.61
  -5   2   2 2365.15  110.08
   5   2  -2 2484.42  110.37
  -5   2   2 2432.41  115.50
   5  -2  -2 2935.69  129.17
   0   3  -1 3822.89  205.74
   0  -3  -1 3805.54  158.32
   0  -3   1 3925.08  165.60
   0   3   1 3678.49  154.06
   0  -3  -1 3880.60  161.21
   0   3   1 3847.42  160.54
   0   3  -1 3986.34  166.49
   0  -3   1 3836.92  166.76
  -1   3   1   15.31   11.12
  -1   3   1   22.23   32.64
   1  -3  -1   29.41   27.11
  -1  -3   1   25.97   30.95
   1   3  -1   37.29   21.26
   1  -3  -1  -23.55   23.22
   1   3  -1   50.35   31.46
  -1  -3   1  -16.11   27.85
   6   1  -4   47.22   18.62
  -6  -1   4   42.33   13.88
  -6   1   4   30.07   45.79
   6  -1  -4   28.92   22.72
  -6  -1   4  -25.51   41.56
  -6   1   4   35.53   12.93
   6   1  -4   37.29   36.46
   6  -1  -4   13.20   28.58
  -1  -1  -512518.52  159.66
   1   1   513071.42  186.54
   1  -1   512328.86  187.56
   1   1   512924.03  168.70
   1  -1   512098.52  184.85
   3   0   466794.67  179.76
  -3  -1   6  149.43   71.91
   3  -1  -6  208.28   84.13
  -3  -1   6  153.14   94.44
  -3  -1   6  212.84   53.87
  -3   1   6  160.96   73.62
   3   1  -6  174.16   43.68
   3  -1  -6  150.82   40.36
  -3   1   6   92.47   53.59
   5   2  -1  477.46   63.84
  -5   2   1  551.77  176.89
   5  -2  -1  544.20   73.83
  -5  -2   1  475.61  175.05
   5  -2  -1  429.69   67.75
   2  -1  -6  715.93   50.79
  -2  -1   6  729.32  100.05
  -2   1   6  730.76  123.94
  -2  -1   6  638.17  136.67
  -2  -1   6  763.41   45.08
   2   1  -6  784.04   56.82
   2  -1  -6  757.52   54.64
  -5   2   3   -4.76   37.56
   5  -2  -3   17.25   10.97
  -5   2   3  -29.90   27.36
   5  -2  -3   31.30   30.37
  -5  -2   3  -12.65   11.79
   5   2  -3    9.88   16.05
   5   2  -3    1.24    8.53
  -5  -2   3  -18.91   38.84
  -6   0   5    7.00   24.85
   6   0  -5   -0.32   19.79
   6   0  -5  -27.47   33.08
  -6   0   5   -2.52   19.48
   1  -2   4 7582.55  126.05
   1   2   4 8034.19  109.26
  -1  -2  -4 7867.35  124.52
  -1   2  -4 7934.91  133.24
   1  -2   4 8393.94  136.11
  -1  -2  -4 7917.52  103.62
   5   0   2 1955.77  119.11
   5   0   2 1954.65   91.95
  -5   0  -2 1951.63   95.90
  -5   0  -2 2046.65  119.19
  -1   3  -1  526.47   59.12
  -1  -3  -1  454.83   77.57
   1  -3   1  509.92   49.61
  -1  -3  -1  416.96   48.23
  -1  -3  -1  474.61   30.94
   1   3   1  436.17   70.61
  -1   3  -1  267.29  145.13
   1  -3   1  408.70   72.83
  -2   3   1  576.23   80.16
   2  -3  -1  645.09   73.56
   2   3  -1  671.27   47.54
  -2  -3   1  654.90  122.52
  -2   3   1  622.72   67.32
   2  -3  -1  690.13   46.34
  -2  -3   1  638.75   51.85
  -2  -3   1  609.12   37.05
  -2  -2   5 2746.44  163.49
   2   2  -5 2812.89  121.50
   2  -2  -5 2806.25  159.81
  -2  -2   5 3017.72  132.19
  -2   2   5 2800.75  146.93
   2  -2  -5 2782.13  112.47
   5   0  -661956.76  196.36
   1   3  -2  847.50  108.88
  -1  -3   2  724.30   47.57
  -1   3   2  756.18   49.22
   1  -3  -2  478.62   75.87
  -1  -3   2  904.24   83.44
   1  -3  -2  799.55   45.45
   1   3  -2  790.40   77.45
  -1   3   2  765.15  115.54
   4  -1  -6   70.58   31.06
   4   1  -6  136.77   39.66
   4  -1  -6   44.26   36.52
  -4   1   6   74.48   30.08
  -4   1   6   99.18   55.40
  -4  -1   6  111.85   46.80
   4   1  -6  126.41   65.58
  -4  -1   6   74.02   42.68
   2  -3   0  331.17  121.18
   2  -3   0  412.08   48.59
   2  -3   0  369.52   49.27
  -2  -3   0  408.46   64.74
  -2  -3   0  381.96   55.73
  -2  -3   0  355.45  104.95
  -2   3   0  379.58  113.94
  -2  -3   0  385.73  111.10
  -3  -2   5 1038.28   72.73
  -3  -2   5 1085.84  111.87
  -3   2   5 1116.45  115.90
   3  -2  -5 1107.29   96.54
   3   2  -5 1169.67   92.32
   3  -2  -5  981.77   45.83
  -3   2   5 1038.97   72.73
  -3  -2   5 1048.45   93.81
   0   3  -2  579.23   98.46
   0  -3  -2  529.79   45.68
   0  -3   2  275.62  111.37
   0   3   2  541.21   61.96
   0   3  -2  531.29   58.58
   0   3   2  537.38   75.68
   0  -3  -2  458.52   84.50
   0  -3   2  538.16   55.12
  -1   1   6   16.73   19.87
  -1   1   6    3.97    8.15
  -1  -1   6   32.46   18.35
   1   1  -6  -39.49   32.66
   1   1  -6  -33.20   28.34
  -1  -1   6   14.85   22.68
   1  -1  -6    3.94   18.42
   6   1   0   28.07   31.23
   6  -1   0   69.51   28.93
   6   1   0   53.50   22.90
   6   1   0   19.50   14.27
   6  -1   0   69.63   24.92
   6  -1   0   39.28   23.01
  -6   1   0   39.66   20.85
  -6  -1   0   -3.88   43.02
   0   0  -6 2543.30  107.38
   0   0   6 2589.11  110.11
   0   0   6 2406.74  144.41
   0   0  -6 2417.78  111.51
  -1  -2   5 1028.65  123.19
   1   2  -5 1074.82   60.97
   1  -2  -5 1032.27   90.35
   1  -2  -5 1021.65   43.62
   1   2  -5  701.46  322.37
   2  -3  -2  -17.98   21.54
  -2  -3   2  -10.48   21.27
   2  -3  -2   11.42   14.73
  -2   3   2  -23.63   25.67
  -2  -3   2   -0.67   31.83
  -2   3   2   20.59   23.53
  -2  -3   2  -28.64   29.36
   2   3  -2   27.02   21.28
  -4   1  -3 3797.43  186.51
  -4   1  -3 3656.15  163.07
  -4  -1  -3 3749.11  165.14
   4   1   3 3514.12  163.48
   4   1   3 3765.16  156.15
   4  -1   3 3589.62  163.96
  -4  -1  -3 3407.69  146.58
   4  -1   3 3787.13  161.93
   2   0   5   -5.28   32.62
  -2   0  -5   -0.05   19.42
   2   0   5  -13.38   24.21
  -2   0  -5    5.92   13.95
   5   2   0 3232.27  143.74
  -5  -2   0 3188.10  141.90
   5  -2   0 3157.97  202.24
   5  -2   0 3666.67  158.44
   5  -2   0 3896.67  192.69
  -5   2   0 3151.97  148.71
  -7   0   3  -31.20   50.47
   7   0  -3  -30.92   35.16
  -7   0   3   -5.30   24.09
   7   0  -3   -3.25   21.67
  -5  -2   4 4950.33   79.50
   5   2  -4 5052.07   81.66
   5  -2  -4 5351.36  102.06
   5  -2  -4 5242.42   97.74
  -5  -2   4 4873.63  100.84
  -5   2   4 4866.93   97.81
  -5   2   4 4974.26  120.73
  -3   1  -4  578.36   74.27
   3  -1   4  568.91   94.37
   3  -1   4  520.82   69.77
  -3   1  -4  580.56   57.91
  -3  -1  -4  587.64   68.67
   3   1   4  502.43   60.98
  -3  -1  -4  525.73   86.74
   3   1   4  558.75   90.74
   6  -1  -5  822.13   63.60
  -6   1   5  778.13   60.00
   6  -1  -5  607.13   45.57
   6   1  -5  840.17   47.68
  -6  -1   5  726.07   46.78
   6   1  -5  503.12  121.93
  -6  -1   5  727.91   61.68
  -6   1   5  766.02   53.56
   5   1   2    6.87   11.09
   5  -1   2  -13.76   35.70
  -5  -1  -2    4.55   14.34
   5   1   2   15.54   10.05
  -5   1  -2  -11.67   25.12
  -5   1  -2   -2.12   19.79
   5  -1   2   14.79   34.03
  -5  -1  -2   22.59   11.63
   4   2  -5  342.60   30.02
  -4   2   5  297.55  128.16
   4  -2  -5  303.78   25.42
   4  -2  -5  303.11  142.64
  -4  -2   5  280.96   54.60
   4   2  -5  366.67  110.68
  -4   2   5  323.39   43.50
  -4  -2   5  334.77  106.77
  -2   3  -1 3176.49  174.54
  -2  -3  -1 3073.70  130.43
   2   3   1 3137.64  132.77
  -2   3  -1 3505.76  181.97
  -2  -3  -1 3069.02  145.44
  -2  -3  -1 3165.66  131.25
   2  -3   1 2972.09  134.68
   2  -3   1 3624.11  169.80
  -6   0  -1   22.73   33.55
  -6   0  -1   18.04   20.16
   6   0   1   -6.22   28.76
   6   0   1  -29.91   24.72
  -7   0   4   17.25   22.89
  -7   0   4    1.34   12.93
   7   0  -4    1.23   14.03
   7   0  -4   13.52   21.12
   3  -2   3 1016.48   86.58
   3   2   3  979.15  101.14
  -3  -2  -3  777.10   62.72
   3   2   3  809.91   72.26
   3  -2   3  978.00   82.13
  -3   2  -3 1137.04  120.23
  -3   2  -3  903.87   69.66
  -3  -2  -3  924.30   79.64
  -1  -3  -2  281.78   66.35
  -1   3  -2  296.31  100.83
  -1  -3  -2  256.03   73.57
  -1   3  -2  345.77   74.00
   1  -3   2  276.63   52.22
  -1  -3  -2  310.43   88.80
   1  -3   2  193.41  130.60
   1   3   2  305.32   81.00
  -3  -3   1 7378.25  103.53
  -3  -3   1 7156.25  121.04
  -3   3   1 7306.00  121.97
  -3  -3   1 7432.31  109.59
   5  -1  -6   43.59   26.30
  -5   1   6   29.84   19.97
  -5   1   6   24.73   17.13
   5   1  -6   -1.06   21.05
  -5  -1   6   15.00   18.92
   5  -1  -6   25.43   22.81
  -5  -1   6  -20.51   27.59
   5   1  -6  -18.56   22.19
  -4   2  -210916.85  167.64
  -4  -2  -210536.20  137.25
   4   2   210438.60  148.06
   4   2   2 9924.85  132.37
  -4  -2  -2 9640.48  157.64
  -4   2  -210024.40  199.10
   4  -2   2 9796.55  156.06
   4  -2   210936.47  167.32
   0  -2   5  214.64   45.59
   0  -2   5  124.98   33.97
   0   2  -5  178.43   78.83
   0  -2  -5  101.84   56.88
   0   2   5  114.48   60.66
   0   2  -5  135.34   89.72
  -3  -3   2   93.65   37.98
   3   3  -2   90.43   44.97
  -3   3   2  110.73   64.95
  -3  -3   2   84.94   20.08
  -3   3   2   32.51   28.74
   3  -3  -2   26.26   40.14
   3  -3  -2   83.05   34.31
  -3  -3   2   99.24   39.21
   1  -3  -315155.31  216.54
   1   3  -313933.29  220.23
  -1  -3   315559.16  223.91
  -1  -3   313939.42  193.58
  -1   3   313858.60  201.15
  -1   3   314132.38  199.81
   1  -3  -314420.29  194.24
  -7   0   1  -67.92   37.50
   7   0  -1  -11.07   26.86
   7   0  -1   16.63   23.48
   7   0  -1    3.98   24.26
   0   1   6   59.26   39.92
   0   1   6   61.23   20.85
   0   1  -6   71.69   54.15
   0  -1   6   80.96   28.42
   0  -1  -6   58.71   24.90
   0   1  -6   62.68   26.96
   0  -1   6   61.86   41.37
   2  -3  -313128.51  185.45
  -2  -3   313370.56  193.71
  -2   3   312646.37  184.04
  -2   3   312726.19  176.02
   2  -3  -313515.33  182.17
  -2  -3   313014.22  177.25
  -2  -3   313780.13  200.65
   3  -3   0 1005.35   66.29
   3   3   0 1042.85   62.03
  -3  -3   0  951.73   54.66
   3  -3   0 1057.15  102.03
  -3   3   0  942.76   74.94
   3  -3   0 1055.60   68.88
  -3  -3   0  929.97   43.48
  -3  -3   0 1020.37  124.92
  -2   1  -546279.19  580.76
  -2  -1  -547189.40  585.60
  -2   1  -546357.43  585.56
  -2  -1  -545162.28  550.96
   2   1   545593.09  558.36
   2   1   544947.01  560.92
   2  -1   547495.87  593.39
  -2  -2  -4 3237.90  149.02
   2  -2   4 3327.25  147.96
   2  -2   4 3585.32  157.66
  -2  -2  -4 3092.61  125.40
  -2   2  -4 3014.93  175.52
   2   2   4 3029.11  130.48
  -2   2  -4 3159.24  172.19
   2   2   4 3066.64  125.54
  -7  -1   3 1416.97   76.57
   7  -1  -3 1600.78  103.32
  -7  -1   3 1436.01   66.41
   7   1  -3 1558.46  102.52
   7   1  -3 1526.88   70.02
  -7   1   3 1253.38   78.38
  -7   1   3 1460.03   80.67
   7  -1  -3 1541.74  128.35
  -6   0   6 9289.75  143.33
   6   0  -6 9397.15  140.89
  -7   1   2 1103.12   83.30
   7   1  -2 1227.08  128.93
   7  -1  -2 1205.99  147.38
   7   1  -2 1166.70   87.98
  -7  -1   2 1111.01   85.66
  -7  -1   2 1156.71   68.41
  -7   1   2 1028.01  117.42
   7  -1  -2 1297.18   90.10
  -3   0   7   -8.54   29.03
   3   0  -7   -0.10   32.55
  -3   0   7   22.16   13.93
   0   3  -310755.33  197.88
   0  -3   311649.61  176.66
   0  -3  -311491.72  157.30
   0  -3  -311439.10  161.51
   0  -3   311172.77  163.14
   0   3   311067.70  175.35
   6  -2  -2 2861.33  128.47
  -6  -2   2 2704.14  126.62
  -6   2   2 2521.87  116.48
   6   2  -2 2717.49  111.92
  -6   2   2 2508.93  120.89
  -6  -2   2 2599.46  105.20
   6  -2  -2 2654.96  118.34
   6   2  -2 2701.73  164.61
  -6   2   3  336.55  106.46
   6   2  -3  316.94   49.77
  -6  -2   3  289.84  116.10
  -6  -2   3  302.40   41.25
  -6   2   3  291.90  107.86
   6  -2  -3  300.37   92.92
   6  -2  -3  332.79   77.80
   6   2  -3  327.90  107.67
  -5   2  -1 1523.08   78.74
   5  -2   1 1381.28   75.12
  -5   2  -1 1373.75   79.71
  -5  -2  -1 1317.33   93.89
  -5  -2  -1 1429.34   66.65
   5   2   1 1481.65   86.52
   5  -2   1 1337.79   79.20
   6   1   1  867.14   52.01
   6  -1   1  884.93  131.76
  -6   1  -1  986.21   87.86
  -6  -1  -1  662.77   57.25
  -6   1  -1  776.57   73.38
  -6  -1  -1  776.89   42.60
   6   1   1  784.66  102.72
   6  -1   1  832.96  114.29
   4   0  -7    6.14   13.98
   4   0  -7  -16.83   28.73
  -4   0   7   -1.73   22.49
  -4   0   7  -22.10   30.73
   1   0   611683.60  174.52
   1   0   612169.48  166.69
  -7   1   4   91.88   78.15
   7   1  -4  120.99   31.39
   7  -1  -4  103.62   35.98
  -7  -1   4   90.26   36.40
  -7   1   4  113.89   58.27
   7   1  -4   51.03   70.41
  -7  -1   4   98.34   62.69
   7  -1  -4   80.71   31.05
  -7   0   5   16.28   21.49
   7   0  -5    8.96   17.18
  -7   0   5    1.21   16.19
   7   0  -5   30.50   20.59
  -2   0   7   23.42   19.10
  -2   0   7   -5.61   18.77
  -2   0   7    3.65   17.87
   2   0  -7  -33.77   28.59
   3   3  -313208.50  177.00
  -3   3   313464.40  199.05
  -3   3   313517.24  201.34
   3  -3  -313442.38  184.51
  -3  -3   313650.98  181.49
  -3  -3   313347.90  194.40
  -3  -3   313528.78  198.43
  -5   2   5  617.66  118.03
  -5   2   5  617.53   82.78
   5  -2  -5  633.88   53.36
  -5  -2   5  546.57  111.05
   5   2  -5  710.74   82.14
  -5  -2   5  612.34   42.37
   5   2  -5  570.32   44.29
   5  -2  -5  674.13   55.11
   2  -3   2 2540.10  116.40
  -2  -3  -2 2657.53  114.77
  -2  -3  -2 2745.98  117.70
  -2   3  -2 2784.53  145.26
   2  -3   2 2829.01  136.56
   2   3   2 2737.92  115.14
  -2  -3  -2 2669.14  113.25
  -2   3  -2 2736.53  144.60
   6  -2  -1   -0.12   20.94
   6  -2  -1    8.75   23.04
  -6   2   1   -1.82   36.47
   6   2  -1  -34.64   22.87
   6  -2  -1   13.04   34.95
  -6  -2   1  -26.20   39.46
  -4   0  -423942.82  312.10
  -4   0  -423088.61  300.29
   7  -1  -155095.53  204.79
   7   1  -154317.94  149.61
   7  -1  -153540.45  241.73
   7   1  -154953.99  201.28
  -7  -1   152665.76  661.81
   5   0   3  -26.09   23.48
  -5   0  -3   15.23   25.12
   5   0   3  -22.60   24.99
  -5   0  -3   10.84   18.27
   3  -3   119920.39  339.58
   3  -3   121766.80  296.67
  -3   3  -121242.49  291.03
  -3   3  -120077.98  311.21
  -3  -3  -121211.41  264.01
  -3  -3  -120433.01  291.68
  -6  -2   4 7291.17  104.53
  -6  -2   4 7198.94  139.48
  -6   2   4 7172.38  116.68
  -6   2   4 7159.62  124.47
   6   2  -4 7865.49  131.17
   6  -2  -4 7593.51  129.21
   6  -2  -4 7449.71  132.19
   6   2  -4 7376.02  116.84
  -6   1   6  221.61   77.91
  -6   1   6  134.02   67.93
  -6  -1   6  233.66   99.97
   6   1  -6  199.04   68.40
  -6  -1   6  209.16   51.00
   6  -1  -6  178.92   70.51
   6  -1  -6  222.94   27.99
   6   1  -6  196.38   58.29
   4  -3  -2    2.43   16.91
  -4   3   2   34.70   38.55
  -4  -3   2   19.30   10.09
   4   3  -2   14.28   13.23
   4   3  -2   -4.63   23.69
  -4  -3   2   18.74   27.48
   4  -3  -2   11.09   29.14
  -4   3   2   21.19   19.58
  -7   0   029392.98  388.75
   7   0   031430.06  443.45
   1   2   5   33.89   25.30
   1   2   5    8.74    8.85
  -1  -2  -5   13.10   16.64
  -1  -2  -5   16.60    9.88
   1  -2   5  -18.48   28.01
  -1   2  -5  -53.43   35.40
   1  -2   5    9.79   11.63
  -1   2  -5   26.13   24.04
  -4  -3   111850.73  153.46
   4  -3  -112358.23  218.11
   4  -3  -111777.01  181.53
  -4   3   111861.26  177.49
  -4  -3   112183.50  154.97
  -4  -3   112165.53  188.73
  -1   3  -313446.47  209.20
  -1  -3  -313527.28  187.10
  -1   3  -314576.87  212.80
   1  -3   314416.40  212.16
  -1  -3  -313276.14  174.55
   1   3   313897.51  192.34
  -1  -3  -313466.21  182.39
  -5   0   7   -8.90   24.22
   5   0  -7   17.87   12.44
   5   0  -7  -30.30   26.92
  -5   0   7   13.53   15.90
  -3  -2   6 3384.70  147.07
  -3  -2   6 3669.31  189.10
   3  -2  -6 3350.14  134.81
   3  -2  -6 3301.05  143.88
  -3   2   6 3326.74  189.56
  -3  -2   6 3264.07  185.71
   3   2  -6 3105.46  135.22
   3   1  -7 5652.32  105.59
   3  -1  -7 5299.33   78.97
  -3   1   7 5352.97   98.16
  -3  -1   7 5490.68  142.75
  -3  -1   7 5328.17   93.05
  -3   1   7 5035.00  112.16
   3  -1  -7 5177.43  137.98
  -3  -1   7 5075.63  127.90
   2  -2  -6 3873.44  152.98
  -2  -2   6 4095.34  177.57
   2  -2  -6 4407.25  133.02
  -2   2   6 3986.56  214.57
  -2  -2   6 4146.93  181.21
   2   2  -6 4446.83   85.65
   2   2  -6 3766.39  164.67
   1   0  -7   17.81   17.96
   1   0  -7    2.09    8.35
  -1   0   7   16.49   19.36
  -1   0   7    0.53   27.48
  -3   0  -5  -16.61   21.68
  -3   0  -5    3.81   12.78
   3   0   5    0.71   11.79
   3   0   5   10.70   19.34
  -4  -1   724215.04  341.28
   4  -1  -725842.47  342.09
  -4   1   725912.19  346.07
  -4  -1   723991.02  328.98
   4  -1  -724686.55  315.10
   4   1  -725976.57  336.38
  -4   1   724006.14  301.98
   4   1  -724500.70  321.25
   2   3  -4   20.33   28.02
  -2  -3   4   29.30   28.93
  -2   3   4   16.62   19.31
  -2   3   4   15.32   22.76
   2  -3  -4   11.86    9.67
   2  -3  -4    6.66   11.30
  -2  -3   4    9.61   29.81
   2   3  -4   -0.31   16.50
   1   1   6  177.94   41.10
  -1   1  -6  144.54   46.61
  -1  -1  -6  143.82   36.00
   1   1   6   72.04   48.98
  -1  -1  -6  161.34   49.39
   1  -1   6  116.94   56.14
   1  -1   6  139.56   33.78
  -1   1  -6  160.23   45.74
  -7   1   5 6893.36  122.69
   7   1  -5 7437.21  125.44
  -7  -1   5 7006.12  139.91
  -7   1   5 7135.42  153.87
  -7  -1   5 7510.49  157.84
   7  -1  -5 7575.22  129.42
  -2  -1   7  191.99   53.38
  -2  -1   7  246.70   76.16
   2  -1  -7  184.59   65.88
   2   1  -7  215.79   89.60
  -2  -1   7  220.35   57.51
  -2   1   7  258.46   71.09
   1   3  -4    8.58   11.78
  -1  -3   4  -41.84   32.14
   1  -3  -4   17.80   21.84
  -1   3   4    1.21   19.53
  -1   3   4   15.82   12.52
   1   3  -4   -3.51   36.15
  -1  -3   4    6.68   22.58
   1  -3  -4    3.05    8.81
   6   0   2 1966.82   93.74
  -6   0  -2 2078.55   94.40
  -6   0  -2 1971.70  188.55
   6   0   2 1837.95   88.65
  -4   3   310926.67  164.03
   4   3  -311799.90  157.72
  -4  -3   311519.67  155.77
  -4   3   311985.88  187.02
   4  -3  -311623.82  213.61
   4   3  -311999.23  179.48
   4  -3  -312063.93  169.92
  -4  -3   311644.40  174.62
   4  -2  -617583.36  226.65
  -4  -2   616703.07  258.85
  -4   2   617807.18  236.28
   4   2  -616907.26  227.90
   4  -2  -617296.31  255.53
  -4   2   616931.95  241.37
  -4  -2   616513.60  236.54
   4  -3   0   32.94   32.33
   4  -3   0   -4.18   41.69
  -4   3   0  104.97   52.64
   4  -3   0   15.69   26.23
  -4  -3   0   39.30   13.24
   4   3   0   49.27   21.52
  -4  -3   0   31.51   34.63
  -4  -3   0   34.33   13.79
  -4  -1  -4   73.30   32.95
   4   1   4   70.07   32.33
   4   1   4   60.83   27.92
  -4  -1  -4   59.28   15.45
   4  -1   4   87.58   58.70
   4  -1   4   20.60   21.01
  -4   1  -4   82.72   71.42
  -4   1  -4   70.49   51.12
  -1   2   614337.50  208.41
   1   2  -615420.18  215.75
   1   2  -614897.33  225.39
  -1  -2   615440.30  220.77
  -1  -2   614719.11  218.17
   6  -2   0 1648.93  100.31
   6   2   0 1523.45   64.77
   6  -2   0 1379.65   79.81
  -6   2   0 1401.01   79.20
   6  -2   0 1355.87  114.58
  -6  -2   0 1461.46  105.78
  -3  -3   4   23.15   19.08
   3   3  -4    1.38   13.06
  -3  -3   4    6.71   30.79
  -3   3   4   -2.43   22.61
   3  -3  -4   14.98    9.10
  -3  -3   4   19.34   19.99
  -3   3   4  -16.33   34.89
   3  -3  -4   13.41   19.76
  -5   1  -3 2433.94  115.10
   5  -1   3 2630.38  116.50
  -5  -1  -3 2271.08  100.77
   5   1   3 2649.63  117.61
   5   1   3 2412.17  108.61
  -5   1  -3 2629.24  120.12
   5  -1   3 2390.67  114.92
  -5  -1  -3 2619.64  114.25
  -4  -2  -3   16.37   11.54
   4  -2   3   14.77   12.40
  -4  -2  -3    6.13   14.15
   4  -2   3   40.78   24.22
  -4   2  -3   18.87   15.91
  -4   2  -3   46.28   40.76
   4   2   3    7.47   20.07
  -7   0   6   24.74   23.27
   7   0  -6   22.10   16.59
   7   0  -6   32.49   29.30
  -7   0   6   13.06   19.84
   7  -1   0  586.11  118.96
   7   1   0  481.48  106.54
  -7  -1   0  502.02   56.54
   7   1   0  531.38   52.05
   7  -1   0  561.21   87.66
   7   1   0  547.35   40.64
  -7   1   0  592.91   72.23
   7  -1   0  480.97   59.57
   3   2   414651.97  332.81
   3  -2   414398.08  219.38
   3  -2   414940.40  213.39
  -3   2  -414911.29  343.16
  -3   2  -413496.81  345.29
   3   2   415542.41  348.02
  -3  -2  -414217.50  186.99
  -3  -2  -414754.01  197.58
   8   0  -3  -31.07   33.13
  -8   0   3   13.30   11.46
   8   0  -3    2.59   22.71
  -8   0   3    7.38   16.46
  -5   1   726504.55  586.78
   5  -1  -726462.36  584.60
  -5  -1   726769.39  600.12
   0   3  -4   66.25   44.93
   0  -3   4   44.14   38.24
   0   3  -4   87.39   47.43
   0  -3  -4   84.20   18.20
   0  -3   4   45.32   23.99
   0  -3  -4   68.45   39.11
   0   3   4   55.11   26.67
   0  -3  -4   84.89   16.84
   6  -2  -5  529.43   38.32
  -6   2   5  520.08  166.39
   6   2  -5  526.92   79.75
  -6  -2   5  525.31   44.51
  -6   2   5  538.29   48.95
  -6  -2   5  575.06   74.17
   6   2  -5  575.51   71.01
   6  -2  -5  550.82   39.60
  -1  -1   7 1669.72   91.01
  -1   1   7 1653.49   75.71
   1   1  -7 1667.08   89.97
  -1   1   7 1506.56  107.16
   1  -1  -7 1733.35   92.31
  -1  -1   7 1518.07   97.49
   1   1  -7 1673.59  104.38
   3  -1   519491.20  447.41
  -3  -1  -519911.25  447.08
  -3   1  -520135.62  464.78
  -3  -1  -518827.76  418.89
   3   1   520428.27  454.80
   3   1   518842.60  425.63
  -3   1  -518200.85  414.74
  -5   2  -2 5957.42  164.15
  -5  -2  -2 6526.27  149.60
   5   2   2 6290.14  157.21
  -5  -2  -2 6325.84  171.95
   5   2   2 7118.25  173.86
  -5   2  -2 6381.09  192.70
   5  -2   2 6493.96  193.37
   5  -2   2 5758.93  192.22
  -8   0   4  820.24   40.35
   8   0  -4  880.08   45.03
  -8   0   4  899.23   85.88
   8   0  -4  883.95  103.11
  -3   3  -2  373.50  137.12
   3  -3   2  437.93  104.82
   3  -3   2  451.75  121.38
  -3   3  -2  473.58   37.98
   3   3   2  461.25   78.24
  -3  -3  -2  372.33   43.37
  -3  -3  -2  374.13   62.54
   3   3   2  383.39   73.12
  -6   0   7   12.28   15.63
   6   0  -7   -3.85   21.54
  -6   0   7   -3.11   26.65
   6   0  -7  -36.24   25.91
  -8   0   223368.98  530.10
   8   0  -225369.51  566.88
  -8   0   224953.53  564.59
   8   0  -223052.29  519.53
   2   0   6 3503.86  170.46
   2   0   6 3460.12  159.63
  -2   0  -6 3368.69  155.57
  -2   0  -6 3723.18  171.48
   2   3   3 9466.61  219.72
  -2  -3  -3 9228.57  211.47
  -2   3  -310113.54  242.45
   2  -3   3 9630.76  231.08
   2  -3   3 9716.89  237.08
  -2   3  -3 9119.51  224.26
  -2  -3  -3 8996.07  206.50
   0   0  -7   21.98   23.45
   0   0   7  -46.94   31.58
   0   0   7    4.80   14.37
   0   0  -7    6.56   11.57
  -6  -1  -2   84.04   48.76
  -6   1  -2   58.40   33.56
  -6  -1  -2   50.74   19.93
   6  -1   2   31.42   33.54
   6   1   2   37.99   24.83
   6  -1   2   42.91   21.48
   6   1   2   48.12   24.45
  -6   1  -2   54.41   38.45
   5  -2  -610640.16  253.89
  -5  -2   610785.21  260.64
   5  -2  -610954.68  250.54
  -5  -2   610542.85  246.41
   5   2  -611065.57  256.57
  -5   2   611140.85  255.60
   5   2  -611086.56  292.02
  -5   2   610275.68  262.99
  -4  -3   4  -23.02   18.22
   4  -3  -4   31.44   26.96
  -4   3   4   10.52   29.86
  -4  -3   4  -19.36   31.14
   4  -3  -4    9.78   10.37
  -4   3   4   22.20   23.91
  -4  -3   4   34.16   24.10
   4   3  -4   18.30   18.12
   0  -2  -6 3152.85  162.01
   0  -2   6 2540.27  124.49
   0   2  -6 2506.64  127.12
   0   2  -6 2742.75  133.08
   0  -2   6 2694.53  153.34
   0   2   6 2543.31  156.79
   4  -3   122354.83  514.51
   4  -3   119784.19  456.18
  -4  -3  -120803.48  455.58
   4   3   123030.41  520.36
  -4   3  -120433.83  494.96
  -4   3  -122010.91  502.16
  -4  -3  -120613.14  471.67
  -5   3   2  222.10   52.97
  -5   3   2  203.17   57.53
   5   3  -2  265.47   45.10
   5  -3  -2  266.17   87.98
  -5  -3   2  218.68   91.27
  -5  -3   2  260.60   44.00
   5   3  -2  243.78   57.73
   5  -3  -2  258.59   74.62
   7   0   1    5.99   21.28
  -7   0  -1   19.97   24.99
  -7   0  -1  -21.18   20.57
   7   0   1  -14.07   27.69
   2  -2   511264.25  266.39
   2  -2   510256.23  244.94
  -2  -2  -510810.19  243.20
  -2   2  -511495.50  270.38
   2   2   511461.74  255.69
   2   2   510962.51  257.58
  -2   2  -510263.67  249.14
  -7  -2   3  389.56   51.73
  -7   2   3  449.78  136.11
   7  -2  -3  335.51   85.27
  -7  -2   3  346.13   42.00
  -7   2   3  377.47  107.72
   7   2  -3  312.54   64.45
   7  -2  -3  342.50  109.73
   7   2  -3  314.46  114.58
  -7   1   6  273.45   32.45
   7   1  -6  336.37   85.15
   7  -1  -6  349.18   39.86
   7  -1  -6  341.06   41.20
  -7  -1   6  363.72  105.80
   7   1  -6  358.16   95.69
  -7   1   6  361.80  140.46
  -7  -1   6  341.70   42.40
  -7   2   211898.41  282.30
   7   2  -212337.79  274.22
   7  -2  -212619.64  297.92
   7  -2  -212367.18  293.78
   7   2  -212010.16  281.01
  -7  -2   212291.31  275.36
  -7   2   212234.29  294.11
  -7  -2   211553.56  274.01
  -8  -1   3 4035.30   83.34
  -8   1   3 4219.91  155.48
   8   1  -3 4226.98  118.70
   8  -1  -3 4264.67  127.04
   8   1  -3 4214.87  107.88
  -8  -1   3 3839.97   73.30
   8  -1  -3 4098.42  118.84
  -8   1   3 4120.71  140.36
   8   0  -5  -21.84   21.89
  -8   0   5   -4.89   21.89
   8   0  -5   -6.33   23.66
  -8   0   5   32.20   19.53
  -5  -3   1 2216.30   97.89
   5  -3  -1 2348.02  150.62
   5  -3  -1 2324.75  150.30
  -5  -3   1 2066.65  109.30
   5   3  -1 2420.80  146.80
  -5   3   1 2159.84  116.37
   5  -3  -1 2373.98  117.29
   5   3  -3 4931.68  121.77
   5  -3  -3 4927.77  135.56
  -5   3   3 4743.08  140.92
  -5  -3   3 4891.89  135.32
  -5   3   3 4673.04  128.19
   5   3  -3 5137.47  162.69
   5  -3  -3 5301.33  134.25
  -5  -3   3 4864.15  118.86
   1   3   4 2209.50  131.85
  -1  -3  -4 2048.01  100.89
  -1   3  -4 2450.63  118.33
  -1  -3  -4 2399.08  138.36
  -1   3  -4 2150.80  114.56
   1  -3   4 2325.66  127.78
   1  -3   4 2314.29  123.20
  -1  -3  -4 2084.59   96.79
   8  -1  -4   45.74   38.11
   8   1  -4  -21.74   31.11
  -8   1   4  -16.07   40.30
   8  -1  -4   33.50   25.64
   8   1  -4   20.92   13.62
  -8   1   4   20.30   42.54
  -8  -1   4   32.36   18.37
  -8  -1   4   41.84   34.88
   6   2   1 2164.41  146.68
  -6   2  -1 1889.57  113.12
   6  -2   1 1835.29   94.92
  -6  -2  -1 1806.53  101.63
   6  -2   1 1901.62  131.20
  -6  -2  -1 1795.65   85.39
  -6   2  -1 2162.11  110.62
   6  -1  -7 8315.02  195.28
  -6  -1   7 8371.39  206.80
   6   1  -7 8652.91  210.99
   6  -1  -7 8727.52  215.49
  -6  -1   7 8131.93  204.33
   6   1  -7 8772.31  227.39
  -6   1   7 8225.34  205.42
  -6   1   7 8422.74  205.94
  -8   0   1  -17.37   37.64
   8   0  -1   11.15   15.99
   8   0  -1   11.85   14.87
   8   0  -1   -0.58   26.71
  -7  -2   410933.93  267.32
  -7   2   4 9776.23  233.60
   7  -2  -410983.44  261.74
   7   2  -411053.40  261.87
   7   2  -410984.32  248.84
   7  -2  -410329.71  245.98
  -7  -2   410286.54  233.15
  -7   2   410757.75  259.20
   8   1  -2 3898.93   71.15
  -8  -1   2 3683.14  219.95
   8   1  -2 3732.27   51.83
  -8   1   2 3687.54  241.25
  -8  -1   2 3563.63  164.64
   8  -1  -2 3480.60  160.16
  -8   1   2 3503.94  166.22
   8  -1  -2 3934.17   76.10
   2   1   6 2686.73  127.79
   2  -1   6 2649.25  122.16
  -2   1  -6 2463.49  119.59
  -2  -1  -6 2551.49  116.21
  -2   1  -6 2615.15  138.80
   2  -1   6 2571.28  141.48
   2   1   6 2441.51  127.85
  -2   3   5 9747.44  233.71
   2  -3  -510376.85  233.88
  -2  -3   510082.62  238.76
  -2  -3   510898.38  280.03
   2  -3  -510302.33  247.13
  -2   3   5 9984.09  230.29
   2   3  -5 9859.24  242.35
   0  -1  -7   -5.28   28.53
   0  -1  -7    4.04    9.24
   0   1  -7   36.40   31.52
   0  -1   7  -10.08   30.01
   0  -1   7   21.40   24.42
   0   1   7   39.38   38.59
   0   1  -7   38.72   29.49
   0   1   7   12.49    5.59
  -3  -3   5 2102.64  136.73
  -3   3   5 2134.87  121.95
  -3  -3   5 2238.37  110.92
   3   3  -5 2306.23  111.36
  -3   3   5 2026.85  105.38
   3  -3  -5 2125.47  106.95
   3  -3  -5 2084.81  104.60
  -3  -3   5 2002.38  108.47
  -3   0   8 4688.48  118.60
  -3   0   8 4526.12  123.53
   3   0  -8 4653.43  154.53
  -3   0   8 4544.21  130.42
  -4   0   810387.89  251.20
   4   0  -811634.62  274.10
  -4   0   810638.23  246.54
   4   0  -811265.83  258.85
   7  -2  -1 3538.32  164.22
   7  -2  -1 3119.70  151.68
  -7  -2   1 3258.96  165.85
   7   2  -1 3464.28  150.59
   7   2  -1 3459.80  161.05
   7  -2  -1 3358.37  157.76
  -7   2   1 3424.47  166.06
  -1  -3   514906.50  371.95
  -1  -3   514110.50  331.47
   1  -3  -514534.75  324.29
   1  -3  -512702.89  301.67
   1   3  -513265.66  353.16
   1   3  -515093.92  347.84
  -1   3   514573.79  338.06
   7   1   1   71.90   25.49
   7  -1   1  108.22   53.46
   7   1   1  132.10   55.88
  -7  -1  -1  156.38   44.11
  -7   1  -1  152.08   53.95
   7  -1   1  159.68   48.02
  -7   1  -1  104.22   49.41
  -7  -1  -1  161.23   75.70
  -5   0  -4 2637.05  143.41
  -5   0  -4 3139.63  145.40
   5   0   4 3685.22  167.42
   5   0   4 3093.97  147.39
  -5   3   0  641.61   83.75
   5  -3   0  592.57   98.31
   5  -3   0  640.58  117.47
   5  -3   0  532.23  125.48
   5   3   0  749.56  111.74
  -5  -3   0  689.35  115.44
   6  -2  -6   15.77   23.24
  -6   2   6   23.30   14.87
  -6  -2   6   23.06   26.10
   6   2  -6   43.42   27.59
   6   2  -6   22.61   37.68
  -6  -2   6   -0.49   36.92
   6  -2  -6   48.18   35.88
  -6   2   6    9.73   22.43
   5   3  -4   20.57   23.51
  -5  -3   4   18.18   27.06
   5  -3  -4   25.41   25.43
   5  -3  -4   40.15   20.86
  -5   3   4  -10.49   36.20
  -5   3   4   26.68   25.97
  -5  -3   4    3.76    4.99
   5   3  -4   22.68   16.22
   8   1  -5 3351.35  174.66
   8  -1  -5 3177.91  147.45
  -8  -1   5 2930.42  141.20
   8  -1  -5 3074.66  144.41
  -8   1   5 2941.69  142.06
   8   1  -5 3472.77  172.96
  -8   1   5 2999.06  145.22
  -8  -1   5 3050.69  144.77
   7   0  -7   17.12   14.30
  -7   0   7   -6.44   30.91
  -7   0   7   18.13   21.53
   7   0  -7  -32.32   22.67
  -3  -2   7  516.99   45.86
   3  -2  -7  526.38   38.80
   3  -2  -7  497.92   51.51
  -3   2   7  357.45   76.75
   3   2  -7  636.23   53.44
  -3  -2   7  555.87  190.69
  -3  -2   7  551.14   38.90
   4   0   5  -19.09   22.18
  -4   0  -5  -15.46   25.55
  -4   0  -5   -5.88   25.13
   4   0   5   10.08   22.73
  -2   0   8 3457.83  155.18
  -2   0   8 3197.45  207.89
  -2   0   8 3317.94  154.59
   2   0  -8 3152.41  158.85
  -5   0   820901.09  476.71
   5   0  -823002.65  519.02
   5   0  -823652.14  530.69
  -5   0   820727.80  465.47
   6   0   3    2.55   19.53
  -6   0  -3  -19.67   36.18
   6   0   3   38.94   35.72
  -6   0  -3   26.08   10.69
  -1   0  -7   28.00   21.76
  -1   0  -7   -4.73   27.42
   1   0   7  -49.84   34.39
   1   0   7   -4.27   12.69
  -4  -3   5    1.15   22.93
   4   3  -5   15.28   14.59
  -4  -3   5   12.37   20.46
  -4  -3   5   32.67   22.90
  -4   3   5  -16.64   22.49
  -4   3   5   27.78   24.55
   4  -3  -5    4.16   12.13
   4  -3  -5   13.78   32.53
   8  -1  -117676.31  412.15
   8   1  -117934.51  400.80
   8   1  -116943.10  379.64
   8  -1  -117399.14  402.77
  -8   1   116669.73  398.13
   8   1  -117873.01  409.29
  -8  -1   117948.71  436.18
   8  -1  -117281.34  400.20
  -4  -2   7 1551.98   79.96
  -4   2   7 1595.92   75.93
   4  -2  -7 1500.74  112.93
   4   2  -7 1532.24   77.87
  -4  -2   7 1575.23  103.20
  -4  -2   7 1388.01   86.50
  -4   2   7 1613.50   90.93
   4  -2  -7 1616.48   74.50
   1   2   6 4076.68  118.99
   1  -2   6 4095.69  161.19
   1   2   6 3770.35   28.28
  -1  -2  -6 3966.41   36.02
  -1   2  -6 3955.66   85.45
   1  -2   6 3758.65  125.62
  -7   2   5   18.32   25.33
   7   2  -5   19.67   17.04
  -7  -2   5   -5.95   17.86
  -7  -2   5   19.45   35.81
   7  -2  -5  -10.84   25.10
   7   2  -5  -15.18   32.24
   7  -2  -5   36.76   23.67
  -7   2   5   67.16   44.04
   2   2  -7 1267.27  159.58
   2  -2  -7 1508.80  106.57
  -2   2   7 1364.09  106.90
   2   2  -7 1530.45   94.23
  -2  -2   7 1422.79   93.36
  -2  -2   7 1540.98   90.32
   3  -3   3 8517.68  213.57
  -3   3  -3 8463.83  221.05
  -3  -3  -3 8822.04  201.56
   3  -3   3 9026.29  221.56
   3   3   3 8897.81  206.86
  -3  -3  -3 8691.15  217.10
  -3   3  -3 9015.08  220.73
   3   3   3 9094.75  212.98
   8   0  -6  190.27   53.37
   8   0  -6  275.89   59.11
  -8   0   6  278.47  112.03
  -8   0   6  275.51   62.59
   4  -3   2  327.86   76.71
   4   3   2  261.83   64.82
  -4   3  -2  340.95  112.32
   4  -3   2  250.38   79.26
  -4  -3  -2  193.86   83.97
  -4   3  -2  242.29   91.20
  -4  -3  -2  243.39   35.22
   0  -4   0 5069.84  180.23
   0  -4   0 5233.36  135.77
   0  -4   0 4613.54  121.77
   0   4   0 4703.23  132.21
   0  -3  -5 6045.16  143.87
   0  -3  -5 5939.85  165.29
   0   3  -5 5848.23  157.14
   0   3  -5 6203.06  160.78
   0  -3  -5 5868.18  136.21
   0  -3   5 5651.17  152.87
   0   3   5 5948.19  156.91
   0  -3   5 6293.45  197.89
  -3   1   8  778.58   37.12
  -3  -1   8  761.20   35.42
  -3  -1   8  834.45   98.55
   3   1  -8  786.96   45.37
   3  -1  -8  783.01   47.08
  -3   1   8  812.59  125.90
  -3  -1   8  924.85   89.29
  -4  -2  -4 1154.45  111.66
   4   2   4 1262.27   65.42
   4   2   4 1214.10  102.22
   4  -2   4 1208.03  110.12
  -4   2  -4 1203.17   74.90
  -4   2  -4 1050.44   75.02
  -4  -2  -4 1251.08   65.32
   4  -2   4 1241.94   91.14
  -4   1   8  470.75   60.80
  -4  -1   8  185.19   71.02
  -4   1   8  408.26   64.26
  -4  -1   8  391.76   48.35
  -4  -1   8  521.73  149.40
   4  -1  -8  443.64   37.26
   4  -1  -8  503.29   38.60
   4   1  -8  540.00   93.73
   5  -2   3   39.81   28.40
  -5   2  -3   73.91   29.17
   5   2   3   28.73   17.00
  -5  -2  -3   26.49   14.72
   5  -2   3   26.05   28.40
  -5   2  -3   36.02   31.26
   5   2   3   31.40   26.55
  -5  -2  -3   41.83   36.92
  -1   4   0  780.82   99.66
  -1  -4   0  904.34  111.97
   1   4   0  721.84   60.76
  -1  -4   0 1089.73   79.19
  -1  -4   0  830.84   37.42
   1  -4   0  834.06   66.21
   1  -4   0  861.64   56.07
   1  -4   0  856.83   48.42
   8   0   013834.92  321.42
   8   0   015121.62  353.34
  -8   0   013222.08  313.19
   8   0   014149.03  338.14
   0  -4   1 1140.55   64.10
   0  -4   1  812.70   95.28
   0  -4  -1 1070.78  113.30
   0  -4  -1 1014.45   57.12
   0  -4  -1  749.72   39.89
   0   4  -1  885.81  101.78
   0   4   1  928.19  142.06
   0  -4   1  939.15   97.18
   5   1   4   36.78   19.73
   5  -1   4   48.10   26.87
  -5  -1  -4   12.67   32.40
  -5   1  -4   58.27   44.41
   5   1   4   40.85   38.04
  -5   1  -4   40.82   26.79
   5  -1   4   60.80   33.07
  -5  -1  -4   45.67   26.20
   1  -4  -1  114.30   37.74
  -1   4   1  176.07   42.30
  -1  -4   1   90.21   56.28
  -1  -4   1   99.69   22.63
   1   4  -1  146.86   45.53
   1  -4  -1  128.68   38.04
  -1  -4   1  128.47   33.23
   1  -4  -1  154.24   74.22
   2   3   4 2781.78  130.36
  -2  -3  -4 2686.61  119.57
  -2   3  -4 2838.22  202.57
  -2  -3  -4 2897.64  143.88
   2   3   4 2851.82  137.72
  -2   3  -4 3011.26  176.18
   2  -3   4 2765.75  175.61
   2  -3   4 2782.16  182.10
   7  -2   0 5422.24  151.49
   7  -2   0 5837.36  183.18
   7  -2   0 5938.38  156.93
   7   2   0 5963.25  183.65
  -7  -2   0 5389.52  169.26
  -7   2   0 5515.93  150.32
   3   0   6 3527.61  162.87
  -3   0  -6 3140.35  147.96
   3   0   6 2933.01  149.80
  -3   0  -6 3255.01  175.36
   5   2  -7 6420.36  158.56
   5   2  -7 6570.00  190.25
   5  -2  -7 6269.86  164.46
  -5   2   7 6308.62  157.79
  -5   2   7 6197.19  162.99
  -5  -2   7 6127.86  180.76
   5  -2  -7 6497.64  182.38
  -5  -2   7 6015.90  189.80
   7  -1  -7  326.50   81.92
  -7  -1   7  402.99  122.70
  -7  -1   7  406.73  144.55
   7  -1  -7  364.37   34.29
   7   1  -7  428.64   45.98
  -7   1   7  339.04  143.80
   7   1  -7  303.64   41.96
  -7   1   7  393.11  122.38
   4   1   5 3474.61  187.33
  -4   1  -5 3788.97   91.18
   4  -1   5 3541.55  169.82
   4  -1   5 4001.68   75.22
   4   1   5 4046.59  108.31
  -4  -1  -5 3739.80   72.35
  -4  -1  -5 3670.34  180.84
  -4   1  -5 3525.00  173.23
  -1   2   7  255.59   94.70
  -1  -2   7  263.64  119.45
   1  -2  -7  191.59   52.42
   1   2  -7  258.04   77.92
  -1  -2   7  254.07   61.55
   1   2  -7  214.86  155.52
  -6   3   2  203.53   91.60
   6   3  -2  246.03   31.63
   6  -3  -2  215.44   84.64
  -6   3   2  254.20   75.39
   6   3  -2  255.87   65.94
  -6  -3   2  200.39  102.58
  -6  -3   2  217.61   30.77
   6  -3  -2  235.92   81.52
  -2   1   8 1004.28  108.84
   2  -1  -8 1013.94   84.71
  -2  -1   8 1002.39   83.31
   2   1  -8 1063.38   68.32
  -2  -1   8 1123.57   91.68
  -2  -1   8 1159.61   69.37
   1   0  -8 1605.82   77.20
  -1   0   8 1709.66   86.56
   1   0  -8 1788.26   99.31
  -1   0   8 1566.04  101.80
   5   1  -8 3231.49  177.78
  -5  -1   8 2911.35  136.88
  -5   1   8 3033.28  162.68
  -5   1   8 3025.75  157.03
   5  -1  -8 3139.00  141.16
   5  -1  -8 3047.90  172.74
  -5  -1   8 2979.78  142.82
   5   1  -8 3423.00  178.31
  -7   0  -2 1756.72  101.30
   7   0   2 1687.92   96.89
   7   0   2 1873.90  138.54
  -7   0  -2 1794.64  128.00
  -6   1  -3  867.27   79.63
   6   1   3  953.10   77.35
   6  -1   3  907.90   43.25
   6   1   3  793.12   64.04
  -6  -1  -3  915.98   58.86
  -6   1  -3  902.12   44.85
  -6  -1  -3 1033.32   73.38
   6  -1   3  874.51  103.75
   6   0  -815131.69  345.17
  -6   0   813468.59  345.65
   6   0  -814720.99  352.68
  -6   0   814208.27  327.82
   3  -2   5  481.61  118.00
  -3   2  -5  449.52   47.61
   3   2   5  427.59   60.95
  -3  -2  -5  444.84   37.86
  -3   2  -5  450.42   97.51
   3   2   5  343.45   83.99
  -3  -2  -5  473.46   56.78
   3  -2   5  506.72   47.67
  -1   1  -7 3323.38  207.88
  -1   1  -7 3035.29  146.53
  -1  -1  -7 3169.60  144.46
   1   1   7 3301.67  145.08
   1   1   7 3124.37  222.32
   1  -1   7 3409.82  158.35
  -1  -1  -7 3380.75  160.63
   1  -1   7 3101.36  217.16
  -6   3   3  297.84   97.05
   6  -3  -3  167.88   59.77
  -6  -3   3  239.75   50.79
   6   3  -3  244.58   66.88
  -6  -3   3  178.70   79.22
  -6   3   3  248.27   67.50
   6  -3  -3  194.53   55.03
   5  -3   1 6805.75  177.14
  -5   3  -1 7017.41  179.85
   5  -3   1 7794.93  195.91
   5   3   1 7119.95  181.08
  -5  -3  -1 7343.06  163.23
  -5   3  -1 7899.13  199.17
  -5  -3  -1 7493.65  190.00
   5   3   1 7300.79  164.43
  -1  -4  -1  440.91   49.20
   1  -4   1  678.82   43.35
   1  -4   1  683.90  146.86
   1  -4   1  623.58   42.86
  -1  -4  -1  574.38   55.13
  -1   4  -1  630.09  183.61
  -1  -4  -1  260.69   86.42
   2  -4  -1  439.90   43.49
   2  -4  -1  468.87   50.86
  -2  -4   1  537.06  151.75
  -2  -4   1  503.53   76.93
  -2  -4   1  474.52   85.16
  -2   4   1  413.03   85.22
   2  -4  -1  477.48   62.02
  -2  -4   1  432.98   51.02
   8   1  -6   86.46   30.81
  -8  -1   6   42.07   29.64
   8  -1  -6   39.61   25.28
   8   1  -6   35.49   35.05
  -8  -1   6   55.17   41.88
  -8   1   6   45.34   65.94
  -8   1   6   70.47   47.43
   8  -1  -6   68.26   28.81
   5  -3  -5  169.70   58.50
   5  -3  -5  143.56   45.61
   5   3  -5  183.86   53.00
  -5  -3   5  220.66   56.69
   5   3  -5  191.35   61.44
  -5   3   5   80.31   72.90
  -5   3   5  108.90   36.60
  -5  -3   5  106.64   40.12
  -6  -2  -2 4894.66  114.99
  -6  -2  -2 4923.75  157.51
   6  -2   2 4982.02  150.32
  -6   2  -2 5220.80  144.46
   6  -2   2 4656.20  187.74
  -6   2  -2 4874.38  179.06
   6   2   2 4776.54  128.40
  -1  -4   2   65.44   25.63
   1  -4  -2   66.29   26.60
   1   4  -2   84.16   38.76
   1  -4  -2   33.69   18.88
  -1  -4   2   77.41   54.81
   1   4  -2   67.37   48.90
  -1   4   2  111.85   54.21
  -1   4   2   61.18   32.61
  -2  -4   0   47.49   37.01
  -2  -4   0   73.62   33.16
  -2   4   0   61.65   70.10
   2  -4   0  124.97   40.22
  -2  -4   0  124.89   50.35
  -2  -4   0   80.16   22.02
   2  -4   0  122.70   40.89
   2  -4   0  124.79   68.87
   6   3  -1 4268.12  175.45
  -6   3   1 3814.61  131.10
   6  -3  -1 3892.18   78.88
   6  -3  -1 4202.26  132.46
  -6  -3   1 3871.45   93.59
   6  -3  -1 4168.00  117.19
   0   4   2  746.55  120.11
   0  -4   2  742.54   87.43
   0  -4  -2  672.28   33.34
   0  -4   2  706.69   63.13
   0   4  -2  689.98   76.43
   0  -4  -2  734.63   52.03
   0   4   2  625.34   61.84
   0   4  -2  720.10   94.27
  -9   0   4 2109.16  175.31
   9   0  -4 1950.79  114.02
  -9   0   4 2071.68  112.95
   9   0  -4 2077.65  121.82
   9   0  -3  -31.37   31.37
   9   0  -3  -24.86   23.97
  -9   0   3   25.24   16.13
  -9   0   3   -8.50   37.57
   8   1   0 1452.03   86.55
  -8   1   0 1357.61  115.53
   8   1   0 1489.12  160.72
   8   1   0 1402.73  104.76
   8  -1   0 1452.20  103.56
   8  -1   0 1480.26   99.03
   8  -1   0 1605.35  113.90
  -8  -1   0 1332.81  114.12
  -2  -4   2  278.80   44.58
  -2   4   2  242.75   81.67
  -2   4   2  229.34  105.45
  -2  -4   2  315.96  112.57
  -2  -4   2  378.11  110.22
   2  -4  -2  197.50   54.15
   2  -4  -2  247.05   79.21
   2   4  -2  336.10   72.97
   7   2  -612248.75  282.43
  -7  -2   611310.99  290.24
  -7  -2   610959.68  266.07
   7   2  -612323.78  291.20
  -7   2   611437.21  274.80
  -7   2   610675.25  253.94
   7  -2  -612041.62  295.74
   6  -3  -4    4.48   20.90
   6  -3  -4    8.81   43.53
  -6   3   4  -12.42   36.47
  -6   3   4   -9.38   32.56
   6   3  -4   -2.36   14.06
  -6  -3   4    4.81   28.19
   6   3  -4   36.29   26.12
  -6  -3   4   -0.25   14.03
   1  -3   5  150.51   42.35
   1   3   5   76.69   72.35
  -1  -3  -5  144.92   25.52
  -1  -3  -5  139.28   46.63
  -1   3  -5  227.71   38.52
  -1  -3  -5  130.74   28.34
   1  -3   5  139.80   34.91
  -1   3  -5  138.60   68.81
   3  -1   6 1278.60   70.46
   3   1   6 1216.96  100.67
  -3  -1  -6 1204.39   75.95
  -3   1  -6 1316.41   80.72
   3  -1   6 1297.52   93.77
  -3  -1  -6 1220.66  100.37
   3   1   6 1245.63   98.03
  -3   1  -6 1274.41   78.37
  -8   2   3  177.63   56.84
   8  -2  -3  161.27   37.28
   8  -2  -3  112.95   44.40
  -8  -2   3  203.38   36.84
  -8  -2   3  129.70   80.38
  -8   2   3  145.93   99.52
   8   2  -3   61.93   53.43
   8   2  -3   89.41   36.25
  -3  -3   6  181.87   54.20
  -3   3   6  222.33   47.53
   3  -3  -6  233.56   24.54
  -3  -3   6  273.73   97.13
  -3  -3   6  281.44   95.15
   3   3  -6  257.32   94.25
   3  -3  -6  184.97   86.31
  -3   3   6  214.12   44.35
   2   3  -6   41.76   20.79
  -2  -3   6   58.21   26.31
   2  -3  -6   55.95   17.66
   2  -3  -6   30.46   18.96
  -2   3   6   16.35   34.48
  -2  -3   6   50.45   22.65
   2   3  -6   29.00   16.80
  -1   1   8  136.90   37.67
   1   1  -8  104.95   47.99
  -1  -1   8   82.73   30.32
   1  -1  -8   96.63   81.91
   1   1  -8  151.14   40.06
  -1  -1   8  131.06   43.64
  -1   1   8  105.26   25.75
   7  -1   2  262.66   80.26
  -7   1  -2  206.10  133.20
  -7  -1  -2  208.92  154.44
  -7  -1  -2  324.02   25.86
   7   1   2  278.72  109.41
   7  -1   2  367.55   88.44
  -7   1  -2  278.16   31.61
   7   1   2  345.93   77.83
  -6   1   8 1099.77  156.75
  -6  -1   8 1185.00  157.19
   6   1  -8 1400.33  146.75
   6   1  -8 1136.52  121.55
  -6  -1   8 1123.83  108.79
   9   0  -5   18.41   25.34
  -9   0   5  -65.32   46.59
   9   0  -5   16.38   20.34
  -9   0   5   13.97   28.44
   8  -2  -412673.30  302.99
  -8  -2   412079.80  290.30
  -8  -2   412114.96  275.22
   8   2  -413070.93  306.86
  -8   2   411691.11  280.10
   8   2  -412633.74  285.56
  -8   2   412362.70  334.16
   8  -2  -412565.13  297.95
   9   0  -212763.50  300.38
   9   0  -213169.30  304.57
  -9   0   212590.35  299.83
  -2   4  -1 1549.53   93.67
   2  -4   1 1554.07  104.48
  -2  -4  -1 1306.97   70.11
  -2  -4  -1 1603.52   77.72
   2  -4   1 1455.27   89.07
   2  -4   1 1631.70   96.08
  -2  -4  -1 1809.65  107.53
   6   2  -7 1653.44  128.40
   6  -2  -7 1564.12   90.57
   6   2  -7 1604.94  163.15
  -6  -2   7 1499.28  145.61
  -6   2   7 1508.67  138.96
  -6   2   7 1464.13   86.85
  -6  -2   7 1476.93  139.36
   6  -2  -7 1134.32   83.40
   8   0  -7   26.64   13.93
  -8   0   7   44.84   38.12
   8   0  -7  -12.81   29.60
  -8   0   7   18.05   42.35
  -1  -4  -2 1935.23  106.32
  -1   4  -2 1869.15  167.92
   1  -4   2 1896.95  104.00
  -1  -4  -2 1798.34  103.87
   1   4   2 1950.99  120.77
  -1  -4  -2 1761.16  103.41
   1  -4   2 1835.82  104.45
  -1   4  -2 1833.61   94.03
  -8   2   2 5887.38  158.73
   8  -2  -2 6338.67  168.87
  -8   2   2 5566.09  222.42
   8  -2  -2 6119.03  160.68
   8   2  -2 6215.95  159.95
  -8  -2   2 5824.47  161.79
   2  -2   6 1363.91   87.39
  -2   2  -6 1232.22   78.28
   2  -2   6 1228.68  102.34
  -2  -2  -6 1219.62   62.61
  -2  -2  -6 1586.40  115.87
  -2   2  -6 1310.70  115.95
   2   2   6 1189.99  103.86
   0   2   7  155.06   83.54
   0   2  -7  183.56   99.06
   0  -2   7  231.94   62.91
   0  -2   7  159.26   47.74
   0   2  -7  126.38   58.26
   0  -2  -7  188.37   55.65
  -3  -4   1   25.24   12.77
   3  -4  -1   32.54   31.25
  -3  -4   1   41.17   13.32
   3  -4  -1   28.16   27.68
  -3  -4   1   29.40   16.30
   3  -4  -1   38.04   35.99
  -3   4   1   24.40   26.93
  -3  -4   1   27.65   27.36
   4   3  -6   39.49   25.85
  -4  -3   6   48.25   21.28
  -4  -3   6   -3.13   23.62
   4  -3  -6   46.53   18.38
  -4  -3   6   62.05   28.83
   4  -3  -6   23.73   35.80
  -4   3   6   27.12   26.27
  -4   3   6  -11.01   18.76
  -2   0  -7    9.04   20.26
   2   0   7   -3.74   23.46
   2   0   7   19.24   40.95
  -2   0  -7   14.38   20.82
   3  -4  -2 2164.41  105.64
  -3  -4   2 2226.58  113.68
   3   4  -2 2308.95  117.03
  -3  -4   2 2152.99   99.56
  -3   4   2 2298.19  129.62
   3  -4  -2 2296.83  114.49
  -3  -4   2 2239.39  138.90
  -3   4   2 2327.20  140.25
  -1  -3   6  166.52   41.60
   1   3  -6  194.23   71.48
  -1  -3   6  113.38   56.84
   1   3  -6   16.28   47.19
   1  -3  -6   49.61   30.39
   1  -3  -6  137.15   21.63
  -1   3   6   83.74   46.13
   1  -3  -6  158.74   29.10
   6  -3   0  716.64   46.32
   6  -3   0  715.88  185.35
  -6   3   0  579.47   57.65
   6  -3   0  619.59   88.65
   6   3   0  758.95   62.18
  -6  -3   0  668.54   85.48
  -1  -4   3 1941.90  107.07
  -1   4   3 1714.39  110.79
   1  -4  -3 1760.67   93.82
   1   4  -3 1799.27   91.16
   1  -4  -3 1750.96   87.12
  -1  -4   3 1727.51  103.61
   1   4  -3 1783.71  157.29
  -1   4   3 1646.51   96.96
   0   0   8  265.48   71.08
   0   0   8  265.88   43.52
   0   0  -8  225.41   60.06
   0   0  -8  256.57   79.50
   9   1  -4  127.78   44.97
  -9   1   4  115.73   85.64
  -9   1   4  114.33   47.64
   9  -1  -4  113.91   34.44
  -9  -1   4   57.48   54.20
   9  -1  -4  134.16   45.97
   9   1  -4  109.93   45.07
  -9  -1   4  192.17   50.30
  -9  -1   3  868.69  167.79
   9   1  -3  862.55  169.28
  -9   1   3  982.26   77.38
  -9  -1   3  928.18   49.11
  -9   1   3  953.49  172.61
   9  -1  -3  787.82   89.17
   9   1  -3  866.10   61.99
   9  -1  -3  876.04   85.01
   7   0  -8 2572.66  140.48
   7   0  -8 2426.32  156.61
  -7   0   8 2267.07  138.38
  -7   0   8 2249.36  115.06
  -2   4   3  135.60   53.76
  -2  -4   3  117.99   54.78
  -2  -4   3  194.17   52.96
   2   4  -3  188.10   40.79
  -2   4   3  208.30   70.91
   2  -4  -3  151.52   55.85
   2  -4  -3  156.39   40.02
   4   3   3 5013.37  123.29
  -4   3  -3 4871.79  173.56
   4  -3   3 5256.40  144.25
  -4  -3  -3 5096.82  141.69
  -4   3  -3 5163.49  141.92
   4  -3   3 4874.71  166.78
  -4  -3  -3 4969.61  128.58
   7  -2   1  828.24   98.05
  -7   2  -1  913.54   50.13
   7   2   1  778.49  133.17
  -7  -2  -1  751.17  147.23
  -7  -2  -1  842.97   29.02
   7  -2   1  827.04   79.10
  -7   2  -1  839.21   67.32
   3  -4   0 4927.48  141.58
  -3   4   0 4947.74  146.80
  -3  -4   0 4935.51  144.14
  -3  -4   0 4680.19  115.37
  -3  -4   0 4791.60  115.86
   3  -4   0 5065.24  138.38
  -3  -4   0 4515.90  123.57
   3  -4   0 4524.84  141.67
   8   0   1    6.95   32.81
  -8   0  -1   24.54   18.62
  -8   0  -1   16.09   23.32
   8   0   1   32.57   29.07
  -3   3  -4  235.39  108.14
   3   3   4  234.51   50.74
   3  -3   4  136.56   70.04
  -3  -3  -4  286.92   66.32
   3   3   4  255.68   73.41
  -3   3  -4  299.77   88.08
   3  -3   4  237.63   68.15
  -3  -3  -4  226.23   36.15
   8   2  -5  272.84   67.82
  -8   2   5  406.08  146.89
  -8   2   5  236.30  119.36
   8  -2  -5  321.72   93.91
   8  -2  -5  256.71  100.10
   8   2  -5  301.04   79.61
  -8  -2   5  297.14   48.28
  -8  -2   5  340.01   98.02
   0   4   3 3313.89  161.64
   0   4   3 3327.58  156.82
   0   4  -3 3338.36  155.00
   0  -4   3 3118.21  153.79
   0  -4  -3 3239.68  147.10
   0  -4  -3 3642.87  164.84
   0  -4   3 3467.75  168.38
   0   4  -3 3278.78  249.36
   6  -3  -5 1464.37   91.91
  -6   3   5 1324.04   84.18
  -6  -3   5 1442.19   73.26
   6   3  -5 1528.40  102.87
   6   3  -5 1426.71  100.97
  -6   3   5 1377.21  144.43
   6  -3  -5 1532.07   77.45
  -6  -3   5 1311.02  170.88
   5   3   2  108.32   54.16
   5  -3   2   62.81   70.11
  -5   3  -2  178.90   56.37
   5  -3   2  105.86   80.91
  -5   3  -2   68.64   32.49
  -5  -3  -2   56.70   30.63
  -5  -3  -2  120.37   22.91
   9   1  -5 3451.95  168.52
  -9  -1   5 3070.24  143.22
   9  -1  -5 3290.03  156.17
  -9  -1   5 3385.30  202.65
   9   1  -5 3420.55  170.22
   9  -1  -5 3347.92  156.00
  -9   1   5 3263.61  199.24
  -9   1   5 3147.56  158.53
  -9   1   213900.33  330.63
   9   1  -215178.52  353.48
   9  -1  -215957.45  373.81
   9  -1  -214398.83  335.64
  -9  -1   214382.39  342.18
   9   1  -215037.67  340.41
  -8  -2   1 7264.76  187.80
   8   2  -1 7619.95  173.47
   8   2  -1 8061.28  200.26
   8  -2  -1 7690.00  194.67
  -8   2   1 7345.14  196.40
   8  -2  -1 7626.07  194.82
   8  -2  -1 7605.10  249.61
  -8   1   7 1472.08   89.80
   8   1  -7 1490.26   85.60
  -8   1   7 1328.05  103.04
   8  -1  -7 1374.85   92.32
   8  -1  -7 1429.24  100.40
  -8  -1   7 1393.43   88.23
  -8  -1   7 1460.52   82.59
   8   1  -7 1471.45   76.66
  -3  -4   3   38.95   35.24
  -3   4   3   65.60   36.19
   3  -4  -3   46.06   37.84
  -3  -4   3   39.70   28.09
   3   4  -3   57.79   23.54
  -3  -4   3   31.30   14.48
  -3   4   3   43.17   31.22
   3  -4  -3   35.10   17.78
  -9   0   6 1317.97   95.44
   9   0  -6 1536.52  111.13
   9   0  -6 1385.97   75.19
  -9   0   6 1416.16  120.86
   9   0  -1   20.34   27.36
   9   0  -1   -5.62   31.03
   9   0  -1   43.60   61.53
  -9   0   1   40.14   26.99
  -5   3   6  356.24  118.34
   5  -3  -6  380.24  116.78
  -5   3   6  429.18  104.87
   5  -3  -6  483.92   41.04
   5   3  -6  509.77   58.27
  -5  -3   6  338.52   61.61
  -5  -3   6  327.17  106.23
  -5  -3   6  419.71  119.04
  -5   0  -5   -0.35   26.21
   5   0   5   35.95   21.90
   5   0   5   16.80   12.94
  -5   0  -5  -11.96   26.48
  -6   0  -4   31.79   28.87
   6   0   4   36.35   22.50
  -6   0  -4   10.21   34.89
   6   0   4   29.22   26.87
  -2  -1  -7 1978.48   96.96
   2   1   7 2237.02  129.45
  -2  -1  -7 2350.66  149.74
   2  -1   7 2385.35  176.59
  -2   1  -7 2727.80  137.33
   2   1   7 2421.30  112.16
   2  -1   7 2204.07  109.13
  -2   1  -7 2143.92  108.49
  -2  -4  -2 6007.68  167.00
  -2  -4  -2 5700.06  146.29
  -2  -4  -2 5886.98  146.56
   2  -4   2 6123.55  168.51
  -2   4  -2 6370.14  168.23
  -2   4  -2 5869.26  159.75
   2   4   2 6188.17  159.78
   2  -4   2 6120.89  197.15
  -4   0   9   17.30   11.95
  -4   0   9   -0.80   28.78
   4   0  -9    5.95   17.46
  -4   0   9    9.28   26.84
  -3  -2   8 2198.86  117.75
   3   2  -8 2468.11  132.80
   3  -2  -8 2474.14  165.96
  -3  -2   8 2369.81  116.85
   3  -2  -8 1874.03   85.36
  -3  -2   8 2324.51  123.18
  -3   2   8 2162.16  185.18
  -4   2   8  119.75   63.26
   4  -2  -8   85.65   24.57
   4  -2  -8   65.29   36.21
  -4  -2   8  118.88   44.52
  -4  -2   8   85.31   66.58
   4   2  -8  133.57   36.49
  -4  -2   8   62.49   46.98
   0   1   8    3.36   13.80
   0   1  -8   65.15   29.36
   0   1   8   34.81   31.26
   0  -1  -8   17.71   28.15
   0   1  -8   16.90   11.33
   0  -1   8   49.65   33.59
   0  -1   8   24.80   24.58
   0  -1  -8    9.60    9.91
   0   3   6  577.69  127.52
   0  -3  -6  560.01   20.43
   0  -3  -6  535.82   88.57
   0  -3   6  577.06   47.92
   0   3  -6  601.37   96.13
   0   3  -6  427.92   48.87
   0  -3   6  516.08   53.98
   7   1  -8 6746.66  207.75
  -7  -1   8 6382.42  170.74
   7  -1  -8 6559.17  173.52
  -7   1   8 6133.02  173.26
   7   1  -8 6469.27  169.13
  -7   1   8 6100.16  169.02
  -7  -1   8 6525.80  250.98
   7  -1  -8 6783.31  180.96
   3  -4   1  389.77  124.57
   3  -4   1  139.37   78.74
  -3  -4  -1  288.95   47.89
  -3   4  -1  209.26  141.25
   3  -4   1  223.41  107.51
  -3  -4  -1  301.29   82.47
  -3  -4  -1  286.98   36.15
  -3  -4  -1  260.98   67.13
   3   0  -9  -12.68   27.11
  -3   0   9   15.96   33.24
  -3   0   9   -3.81   13.64
  -3   0   9    7.20   12.49
   8   1   1 1083.04   85.90
  -8  -1  -1 1008.15  143.82
  -8   1  -1 1277.19   96.36
   8  -1   1 1233.27  106.08
   8   1   1 1049.75  110.05
  -8  -1  -1 1170.02   87.34
  -8   1  -1 1039.06   78.11
   8  -1   1 1095.16  217.47
  -5  -2  -4 1894.71  124.80
   5   2   4 1696.80  122.05
   5  -2   4 1752.79   95.89
   5   2   4 1769.59  112.92
  -5   2  -4 1854.06  160.53
  -5  -2  -4 1701.64  119.70
  -5   2  -4 2029.74  123.92
   5  -2   4 1827.70  134.73
  -2  -3  -514299.69  319.09
   2   3   514998.02  334.42
  -2  -3  -514114.53  321.25
   2   3   513463.44  312.70
   2  -3   513403.77  330.76
  -2   3  -514387.78  351.83
   2  -3   514579.73  350.96
  -2   3  -514416.92  347.67
   7  -3  -3  668.19  112.79
   7   3  -3  807.16   40.92
  -7   3   3  688.65   85.40
  -7  -3   3  676.35  104.09
   7   3  -3  750.02   51.56
  -7   3   3  817.12  191.74
  -7  -3   3  673.67   52.82
   7  -3  -3  669.63   69.26
  -5   0   9   17.08   20.71
  -5   0   9   24.00   34.54
   5   0  -9   19.02   19.51
   5   0  -9    9.16   14.31
  -4  -4   2 7394.16  171.10
  -4   4   2 7642.71  206.60
  -4   4   2 7434.59  195.97
   4   4  -2 8131.69  191.77
  -4  -4   2 7425.31  191.43
   4  -4  -2 8055.52  204.49
   4  -4  -2 8016.13  199.74
  -4  -4   2 7851.67  197.92
   4  -4  -1   74.99   24.63
   4  -4  -1   94.37   56.11
  -4   4   1   41.10   57.10
  -4  -4   1  110.58   31.33
   4  -4  -1  112.86   55.12
  -4  -4   1   -8.36   38.61
  -4  -4   1   67.37   25.02
  -4  -4   1  160.01   54.31
  -1  -4  -3 2756.85  130.10
   1  -4   3 2630.35  140.99
  -1   4  -3 2501.88  129.94
   1  -4   3 2447.34  134.52
  -1  -4  -3 2371.28  109.62
   1   4   3 2380.91  151.35
  -1  -4  -3 2460.03  128.17
  -1   4  -3 2560.97  205.57
   7  -3  -2  181.65   63.47
  -7  -3   2  158.47  124.50
   7   3  -2  199.50   48.40
   7  -3  -2  242.53   65.21
  -7   3   2  262.25   64.72
  -7   3   2  174.27   98.43
  -7  -2   7  437.66   51.64
   7  -2  -7  348.72  128.71
   7   2  -7  504.65   46.45
  -7  -2   7  514.27  164.35
   7  -2  -7  421.35   41.80
  -7   2   7  515.32  127.90
   7   2  -7  450.51   89.86
  -7   2   7  354.13  164.58
  -4   2  -5 1685.79   93.08
   4   2   5 1669.66  129.45
  -4  -2  -5 1560.82   78.20
   4  -2   5 1751.46   92.96
   4  -2   5 1644.65  154.92
  -4   2  -5 1530.69   95.21
  -4  -2  -5 1643.94  110.70
   4   2   5 1672.76  100.73
  -4   0  -6  120.53   56.93
   4   0   6  151.66   72.27
  -4   0  -6  219.16   65.54
   4   0   6  210.53   49.20
   2  -2  -8 8537.63  236.47
  -2  -2   8 8589.44  280.86
   2   2  -8 8551.36  221.52
   2   2  -8 7727.33  193.65
  -2  -2   8 8288.65  234.99
  -2   2   8 7936.60  208.04
  -7   0  -3    4.38   15.93
   7   0   3   -0.42   32.51
  -7   0  -3   19.12   16.01
   7   0   3   22.41   22.61
   5   2  -8 1351.84   77.54
  -5   2   8 1356.84   74.29
  -5  -2   8 1219.54   79.82
  -5  -2   8 1375.70   86.78
  -5   2   8 1319.32   81.30
  -5  -2   8 1381.47   99.42
   5  -2  -8 1390.83   91.02
   6   2   3  553.03   89.64
   6  -2   3  518.57  145.57
   6  -2   3  546.20  167.13
   6   2   3  594.03   91.75
  -6  -2  -3  572.27   70.86
  -6   2  -3  672.70   94.58
  -6   2  -3  502.12   42.22
  -6  -2  -3  534.06   37.34
   1   2   7 1326.55   93.45
   1   2   7 1241.70   59.29
   1  -2   7 1182.48   87.56
  -1  -2  -7 1191.86   58.05
  -1   2  -7 1389.54   87.79
  -1  -2  -7 1241.65   87.80
   1  -2   7 1336.01  110.44
  -6   3  -1 1379.04   84.14
   6   3   1 1579.24  118.83
  -6  -3  -1 1558.33  138.91
   6   3   1 1461.22   65.86
   6  -3   1 1377.92  104.04
  -2  -4   4 3915.51   66.80
   2   4  -4 4593.82  125.58
  -2   4   4 4193.93  153.86
   2  -4  -4 4053.91  155.09
   2   4  -4 4022.52  130.03
  -2   4   4 4112.65  121.27
   2  -4  -4 4661.57  137.87
   7  -3  -4  566.54   99.19
  -7  -3   4  597.50   77.32
  -7   3   4  536.54   78.23
   7   3  -4  592.28   52.72
  -7  -3   4  524.39   57.85
   7   3  -4  590.62   47.38
  -7   3   4  591.33   67.86
   9   1  -6  506.18   41.57
   9  -1  -6  596.01   51.78
   9  -1  -6  533.21  109.59
   9   1  -6  406.66   53.14
  -9   1   6  527.56   92.50
  -9   1   6  657.94  105.48
  -9  -1   6  589.48  182.17
  -9  -1   6  503.86   37.02
  -8   2   6 7589.16  196.25
  -8  -2   6 8324.71  228.12
  -8   2   6 7170.64  184.85
  -8  -2   6 7830.14  187.62
   8  -2  -6 7755.06  192.83
   8   2  -6 7954.47  190.80
   9  -1  -1   37.75   28.10
   9   1  -1   47.59   34.55
  -9   1   1  100.47   51.38
   9  -1  -1   83.42   32.49
  -9  -1   1    8.26   28.10
   9   1  -1   50.50   32.84
   9   1  -1   22.63   22.37
   1  -4  -410770.72  250.10
   1   4  -4 9205.99  255.65
   1   4  -4 9997.92  241.58
  -1   4   4 9141.30  218.44
   1  -4  -4 9742.52  240.25
  -1  -4   4 9227.16  236.63
  -1   4   4 9550.72  233.37
   4   4  -3  132.64   40.37
  -4   4   3   41.65   46.45
   4  -4  -3  115.02   33.51
  -4   4   3   90.62   74.81
   4  -4  -3   56.53   24.26
  -4  -4   3  137.82   55.49
  -4  -4   3   11.51   29.49
  -4  -4   3   70.02   39.93
  -5   1  -5   73.26   39.19
   5   1   5   58.17   37.29
   5   1   5   35.70   19.49
   5  -1   5   27.70   33.88
  -5  -1  -5   42.93   23.13
   5  -1   5   41.48   26.50
  -5   1  -5   48.74   43.15
  -5  -1  -5  -30.86   20.83
  -6   1  -4   25.10   39.83
   6   1   4   36.83   39.02
  -6  -1  -4   11.27   14.15
   6   1   4   12.64   18.52
  -6   1  -4    9.70   18.32
   6  -1   4    5.72   31.15
  -6  -1  -4  -10.29   27.76
   6  -1   4   44.52   20.62
  -2   0   9   45.63   32.84
  -2   0   9   22.54   24.26
  -2   0   9   14.02   13.39
   4  -4   0 4563.38  159.35
  -4   4   0 4414.21  177.40
   4  -4   0 4870.42  175.30
  -4  -4   0 4882.86  116.95
  -4  -4   0 4789.74  163.33
   4  -4   0 4496.64  129.01
  -4  -4   0 4563.03  119.08
  -4  -1   9 1675.42  111.18
  -4   1   9 1727.98   93.25
  -4   1   9 1656.57  112.20
   4  -1  -9 1788.53   90.22
   4   1  -9 1889.80  166.43
  -4  -1   9 1812.26   93.05
  -4  -1   9 1657.16  132.89
   3   4  -4 2626.84  128.57
   3  -4  -4 2504.17  123.58
  -3  -4   4 2381.35  114.84
   3  -4  -4 2536.00  117.57
  -3   4   4 2532.54  160.35
  -3  -4   4 2581.54  193.18
  -3   4   4 2281.53  172.87
  -1   0  -8   86.31   45.56
  -1   0  -8   68.15   54.00
   1   0   8   26.28   21.20
   1   0   8   56.48   51.49
  -7  -3   115943.21  417.48
   7  -3  -115987.38  400.67
  -7   3   115524.10  365.68
   7   3  -116361.85  390.12
   6   0  -9   13.46   19.67
  -6   0   9   16.13   22.41
   6   0  -9   -1.33   19.69
  -6   0   9   43.70   34.38
   8  -2   0  630.92  173.45
   8  -2   0  561.44  183.71
  -8  -2   0  524.74  120.75
   8   2   0  449.15  122.17
   8   2   0  466.06   31.10
  -8   2   0  579.08  170.89
   8   0  -8 1234.74   74.02
  -8   0   8 1260.39  136.96
  -8   0   8 1188.84  100.89
   8   0  -8 1053.70  100.41
  -3  -1   9  732.64  101.17
  -3   1   9  731.97   48.48
  -3   1   9  701.96   37.08
  -3  -1   9  699.86   68.44
  -3   1   9  739.97   84.83
  -3  -1   9  835.90   44.06
   5   1  -9  504.10   46.31
  -5  -1   9  502.99  101.72
  -5   1   9  450.21   75.13
   5   1  -9  554.08   54.20
  -5   1   9  523.50   47.72
   5  -1  -9  406.73   26.89
  -5  -1   9  578.50   72.45
  -6  -3   6   12.12   22.36
  -6   3   6   27.46   37.83
  -6   3   6   16.26   41.95
   6  -3  -6   50.85   25.34
  -6  -3   6   28.45   42.98
   6   3  -6   -3.33   23.20
   6  -3  -6   55.10   34.46
   3   2   6 9728.32  234.11
  -3  -2  -6 9789.74  225.86
   3   2   6 9901.85  232.44
  -3   2  -6 9822.49  247.03
   3  -2   6 9973.01  269.53
   0  -4   4 7582.54  201.40
   0  -4  -4 7906.85  188.09
   0   4   4 7608.73  191.83
   0  -4  -4 7680.98  189.86
   0   4  -4 7499.71  194.37
   3   3  -7 1513.16   93.19
   3  -3  -7 1347.75   74.73
  -3  -3   7 1414.55   84.77
  -3  -3   7 1356.18   92.65
   3  -3  -7 1505.29   73.90
  -3  -3   7 1418.33   88.62
  -3   3   7 1368.96  160.02
  -9   0   7    7.56   42.01
   9   0  -7   17.56   24.69
  -9   0   7   19.32   27.31
   9   0  -7   24.30   16.91
   9   0   0  191.34   66.21
  -9   0   0  132.24   55.30
   9   0   0  222.23   65.90
   9   0   0  245.65   57.76
  -4   1  -6 1262.15  128.03
   4  -1   6 1239.50  179.57
   4   1   6 1512.68   78.65
   4  -1   6 1415.26   84.14
   4   1   6 1216.48   83.69
  -4   1  -6 1335.22   92.49
  -4  -1  -6 1387.67   92.33
  -4  -1  -6 1223.97   66.36
   7   1   3  140.74   55.34
   7   1   3  181.57   65.21
  -7  -1  -3  133.94   69.10
  -7   1  -3  169.63   91.71
  -7  -1  -3  222.34   83.26
   7  -1   3  135.76   83.66
   7  -1   3  131.80   47.10
  -7   1  -3  111.54   67.76
   1  -2  -8 8448.16  223.50
  -1  -2   8 8542.90  218.69
  -1  -2   8 8036.61  213.48
   1   2  -8 7788.25  207.38
  -1   2   8 7284.68  189.79
  -7   2  -2 7118.43  191.73
  -7  -2  -2 6521.28  210.11
   7   2   2 6531.14  170.38
  -7  -2  -2 7024.41  164.26
  -7   2  -2 6494.38  222.12
   7   2   2 6743.70  174.19
   7  -2   2 6240.87  176.76
   6  -2  -8   88.15   25.20
  -6   2   8  125.46  100.38
  -6  -2   8   99.86   75.27
  -6   2   8   54.97   35.48
   6   2  -8   61.30   37.46
   6   2  -8  122.54   35.44
  -6  -2   8   80.93   50.47
   3  -4   215070.80  419.88
  -3  -4  -214479.96  324.42
   3   4   214171.67  321.65
  -3  -4  -214929.90  344.32
  -3   4  -214277.32  368.83
  -3   4  -214739.36  368.55
  -3  -4  -216373.86  373.94
   4  -3  -712779.65  313.33
  -4   3   712643.60  286.38
  -4  -3   712252.75  290.01
  -4   3   711915.95  290.47
  -4  -3   712914.22  351.65
   4  -3  -712014.74  275.27
   4   3  -713610.30  319.19
   1  -3   6  335.35  108.66
   1   3   6  218.42  117.29
   1  -3   6  469.74  145.00
  -1  -3  -6  408.39  104.92
  -1  -3  -6  375.67   40.41
  -1   3  -6  397.39  120.55
  -1  -3  -6  354.18   35.67
   7  -3  -510119.79  243.46
  -7   3   510025.51  243.64
  -7  -3   5 9392.67  235.82
   7   3  -5 9930.13  229.56
  -7  -3   5 9335.32  224.35
  -7   3   5 9698.66  258.21
  -2  -3   7 2661.63  153.68
  -2  -3   7 3082.67  170.40
  -2   3   7 2405.50  108.11
   2  -3  -7 3011.10  175.41
   2  -3  -7 3000.38  132.01
  -2   3   7 2606.80  135.43
   2   3  -7 3337.88  178.99
   2   3  -7 2738.32  182.10
  -3   0  -7   32.89   21.89
   3   0   7   46.75   43.52
  -3   0  -7    6.65   12.37
   2   4   3 9255.01  276.78
  -2  -4  -3 9646.85  288.52
  -2  -4  -310798.30  315.17
   2  -4   3 9359.34  333.74
  -2   4  -3 9658.52  349.06
  -2   4  -3 9647.74  316.79
  -2  -4  -3 9690.72  291.94
   8   0   2 1195.22  127.40
   8   0   2 1257.93  157.68
  -8   0  -2 1015.90   60.87
  -8   0  -2 1163.34  106.21
  -2  -1   9   15.06   29.52
  -2  -1   9   32.65   30.80
  -2   1   9  -22.29   38.18
  -2  -1   9   63.43   44.65
  -2   1   9    6.42   11.15
   2  -1  -9    7.69   15.92
  -2   1   9   20.27   16.29
  -4  -4   4 2212.45  136.47
   4   4  -4 2148.99  106.32
  -4   4   4 2204.50  133.63
   4  -4  -4 2071.11  110.28
  -4  -4   4 2095.53  103.69
  -4   4   4 2111.08  147.39
  10   0  -4 2479.51  120.10
 -10   0   4 2675.55  131.72
 -10   0   4 2606.00  144.82
   4   3   4   14.70   13.64
   4   3   4    9.13   18.51
  -4   3  -4   49.41   38.20
  -4  -3  -4   41.22   19.38
  -4  -3  -4   33.01   18.67
   4  -3   4   45.58   39.08
  -9   2   4 2039.86  218.10
  -9  -2   4 1714.54   92.37
  -9  -2   4 1852.88  176.43
   9   2  -4 1864.97   89.47
   9  -2  -4 1730.88  188.26
  -9   2   4 1613.96  114.94
  -9  -2   3 2840.68  139.40
  -9   2   3 2970.45  177.66
  -9  -2   3 2771.37  219.28
   9   2  -3 2809.82  127.67
  -9   2   3 2556.34  130.61
  -1  -1  -8  279.46   53.21
   1  -1   8  298.59   85.61
  -1   1  -8  296.90   86.43
   1   1   8  271.92   37.19
   1  -1   8  302.71   75.17
   1   1   8  168.11  125.16
  -1  -1  -8  346.41   94.05
   6   1  -9  178.46   68.26
  -6  -1   9  206.88   82.26
  -6   1   9  209.71   67.36
   6  -1  -9  157.24   63.36
  -6  -1   9  179.52  110.28
   6   1  -9  202.45   40.50
  -6   1   9  182.19   78.65
  -5  -3  -3 6719.96  197.14
   5   3   3 6554.07  203.67
  -5  -3  -3 6270.29  214.26
   5   3   3 6942.28  220.22
   5  -3   3 6271.09  232.62
  -5   3  -3 6529.34  253.42
   4   4   1  780.61  103.24
  -4  -4  -1  766.10   29.45
  -4  -4  -1  755.14   86.88
   4  -4   1  696.27   63.25
  -4   4  -1  682.19   65.88
  -4  -4  -1  751.32   54.07
  -1   0   9   -9.89   19.07
  -1   0   9   -1.65   36.30
   1   0  -9    6.47   10.51
   8   1  -8 2881.98  145.14
   8   1  -8 2683.61  136.64
  -8  -1   8 2688.40  166.95
  -8   1   8 2707.94  144.56
   8  -1  -8 2823.76  167.81
  -8   1   8 2595.27  129.03
  -8  -1   8 2809.20  170.68
   5  -4  -2 3231.99  161.10
  -5  -4   2 3028.06  137.31
  -5  -4   2 3104.97  167.63
   5   4  -2 2906.93  174.65
  -5   4   2 3113.26  255.21
  -5   4   2 2822.32  147.42
 -10   0   3   15.56   30.74
 -10   0   3   16.36   25.68
  10   0  -3   42.36   33.17
 -10   0   5   14.74   20.07
 -10   0   5   24.10   29.13
  10   0  -5   12.20   20.28
  -7  -3   0  259.35  143.24
   7  -3   0  452.72  104.10
   7   3   0  308.18  104.62
  -7   3   0  437.92   88.44
  -7   0   9   17.08   10.81
   7   0  -9   18.27   23.42
  -7   0   9   58.99   41.77
   5  -3  -712945.01  375.49
  -5   3   712440.00  376.18
   5   3  -713483.50  398.05
  -5  -3   712983.53  383.57
  -5  -3   712437.65  375.65
  -5   3   712746.11  370.94
  -5  -4   1   89.07   44.99
   5   4  -1   27.94   33.22
  -5   4   1   53.49   49.35
   5  -4  -1   36.10   24.77
  -5  -4   1   31.66   14.61
  -5  -4   1   46.06   11.47
   5  -4  -1   57.99   40.02
   9   1  -7  588.89   51.56
   9  -1  -7  714.81   74.49
   9  -1  -7  564.97   43.97
  -9   1   7  552.79   95.71
  -9  -1   7  537.06   63.77
  -9  -1   7  620.79  101.68
  -9   1   7  554.69  205.73
   9   1  -7  603.95   56.91
   9   1   0  527.78   37.22
   9  -1   0  659.96   52.36
   9   1   0  645.88   68.15
  -9  -1   0  665.95   72.31
   9  -1   0  805.15  202.82
  -9   1   0  783.95  213.17
   9   1   0  629.88  107.78
  -5   4   3   77.32   51.41
   5  -4  -3  137.47   41.64
  -5   4   3  152.91   50.75
  -5  -4   3  115.31   69.10
   5   4  -3  160.88   34.25
  -5  -4   3   74.92   47.08
   1  -3  -7 7753.31  240.15
  -1  -3   7 7302.45  265.65
  -1   3   7 7246.11  231.69
   1   3  -7 7084.19  266.83
  -1  -4  -4 3241.53  168.29
  -1  -4  -4 3685.17  170.75
   1   4   4 3289.81  155.32
  -1   4  -4 3409.66  170.51
   1  -4   4 3524.76  181.95
  -1  -4  -4 3404.56  164.01
  -1   4  -4 3297.55  168.94
   3  -3   511542.21  352.00
   3   3   511083.90  329.46
  -3  -3  -511455.20  334.97
  -3   3  -511342.73  371.37
  -3  -3  -511043.79  321.71
   3   3   511255.17  332.51
  -9   2   5 1014.18   79.04
  -9  -2   5 1040.59   50.97
   9  -2  -5 1133.47  159.22
  -9  -2   5 1164.76  164.97
  -9   2   5 1052.94   93.15
   9   2  -5 1116.12   73.61
   9  -2  -2   76.98   53.35
  -9   2   2   45.50   28.37
  -9  -2   2   41.48   54.54
   9  -2  -2    0.47   25.15
   9   2  -2   29.36   16.11
  -8  -2   7  530.90   54.38
   8  -2  -7  539.88   38.34
  -8   2   7  566.59  150.64
   8   2  -7  524.72   77.81
  -8   2   7  506.31  172.48
  -8  -2   7  522.07  198.65
  -3   1  -7 4222.09  198.96
   3   1   7 4154.24  202.99
  -3  -1  -7 4483.05  119.05
   3  -1   7 4215.14  211.25
   3  -1   7 4733.10  156.17
   3   1   7 4732.97  150.91
  -3  -1  -7 4364.87  206.77
  -2   4   5   94.85   66.72
   2   4  -5   89.98   57.67
   2  -4  -5   75.10   51.28
  -2   4   5  130.14   42.87
   2  -4  -5  128.16   24.98
  -2  -4   5  111.28   42.66
   2   4  -5   28.85   40.54
  -8   1  -2  135.16   73.93
  -8   1  -2  202.98   59.32
   8  -1   2  128.16   61.75
  -8  -1  -2  180.65   52.79
   8   1   2  132.95   54.89
   8   1   2   89.78   35.19
  -8  -1  -2  168.74   79.83
   6   3   2   19.99   26.87
  -6  -3  -2   18.79   13.07
  -6  -3  -2   41.25   36.94
  -6   3  -2    4.80   22.33
   6  -3   2   56.28   43.66
   2   2   7  319.84  112.53
  -2  -2  -7  307.68   59.05
   2   2   7  209.80   66.87
  -2  -2  -7  297.47   20.46
   2  -2   7  313.68  110.82
   2  -2   7  468.73  135.89
  -2   2  -7  379.21   60.05
  -3  -4   5   51.50   25.14
   3  -4  -5   23.79   27.16
  -3   4   5   52.14   43.24
   3   4  -5   84.45   55.19
  -3  -4   5   21.03   38.54
  -3   4   5   28.47   21.20
   3  -4  -5   28.53   21.10
 -10   1   4  150.98   60.07
 -10   1   4  123.20   67.71
 -10  -1   4   97.31   41.74
  10  -1  -4  119.66   57.31
 -10  -1   4  124.79   51.60
  10   1  -4  204.46   59.71
  10   0  -2  883.51   74.12
  10   0  -2  832.76   95.75
 -10   0   2  824.84  121.33
   0  -2   8 4548.00  155.51
   0   2   8 4710.43  168.18
   0  -2  -8 4737.04  160.54
   0   2  -8 4461.45   96.51
   0  -2   8 4676.01  162.44
  -7   2   8   12.00   24.63
   7  -2  -8   36.27   23.21
   7   2  -8   27.33   37.95
  -7   2   8   37.39   33.20
   7   2  -8   23.58   16.53
  -7  -2   8   18.11   19.10
  -7  -2   8  -35.12   45.36
   1  -4  -5 1448.29   74.96
  -1   4   5 1501.52   97.39
   1  -4  -5 1494.65   82.35
  -1   4   5 1665.70   96.19
  -1  -4   5 1545.96   96.18
   1   4  -5 1674.24   93.34
   1   4  -5 1645.52  159.40
  -1   1   9   77.37   18.35
  -1  -1   9   50.59   48.47
  -1   1   9   49.85   49.10
   1   1  -9   49.70   28.66
  -1  -1   9   92.55   38.34
   8   2   1  309.53   70.44
   8  -2   1  365.28   96.20
  -8   2  -1  373.40  115.73
   8   2   1  188.48   52.81
  -8  -2  -1  325.06  127.77
  10   1  -3  186.39   46.02
 -10   1   3  268.20   77.54
 -10  -1   3  188.18  123.90
 -10   1   3  271.75   86.10
 -10  -1   3  303.04   89.36
  10  -1  -3  185.90   72.09
   5  -4   0   -2.99   52.68
  -5  -4   0   18.67   23.08
  -5  -4   0   21.51   15.20
  -5  -4   0   19.75   10.52
   5   4   0   16.82   27.09
  -5   4   0   23.74   24.82
 -10   0   6 4544.48  206.83
 -10   0   6 4466.26   73.16
  10   0  -6 4682.84  168.53
   7   3  -6 1050.08   56.59
  -7   3   6  935.11   87.00
  -7  -3   6  944.87   81.48
  -7  -3   6 1171.90  175.09
   7  -3  -6  947.35   79.11
  -7   3   6  985.83   66.60
 -10  -1   5  104.84   40.07
 -10   1   5  174.42   64.89
 -10   1   5   50.19   46.94
 -10  -1   5   96.24   31.34
  10  -1  -5   42.52   33.34
  10   1  -5   42.67   42.97
  -5  -4   4 2169.70  229.06
  -5  -4   4 2084.84  102.48
   5  -4  -4 2281.60  111.60
  -5   4   4 2080.33  127.42
   5   4  -4 2154.70  104.91
  -5   4   4 2068.34  117.14
  -7  -1   9  482.19   67.20
  -7  -1   9  519.23  146.94
  -7   1   9  469.20   64.50
   7   1  -9  468.36   68.02
   7  -1  -9  341.99   87.78
  -7   1   9  486.52   86.41
   7   1  -9  430.40  132.15
  -8   3   3  136.96   90.29
  -8  -3   3  280.97   57.70
   8  -3  -3  190.74   80.08
  -8   3   3  233.25   92.02
   8   3  -3  173.73   26.82
  -8  -3   3  178.74   34.31
  -2   0  -8   18.60   36.57
  -2   0  -8   49.62   26.13
   2   0   8   64.77   43.64
   2   0   8   25.88   42.99
   8   3  -4   -0.45   10.56
  -8  -3   4   20.47   21.27
  -8  -3   4   18.61   15.37
  -8   3   4   30.47   41.02
   8  -3  -4   64.29   56.88
  -8   3   4   45.02   30.52
  -4   4   5   25.71   30.28
   4   4  -5   65.85   38.36
  -4   4   5   54.40   33.54
   4  -4  -5   44.55   41.39
  -4  -4   5  -11.25   34.01
  -4  -4   5   76.60   28.42
   6   3  -7 2504.53  155.19
  -6  -3   7 2506.94  167.69
  -6  -3   7 2633.21  201.28
  -6   3   7 2385.68  195.91
  -6   3   7 2491.22  129.96
   6  -3  -7 2363.64  128.78
   9   0  -8 4020.06  225.39
   9   0  -8 3895.66  200.86
  -9   0   8 3899.06  200.00
  -9   0   8 4124.15  330.15
  -3  -4  -3 2445.16  134.57
   3   4   3 2400.95  126.30
   3  -4   3 2486.15  157.07
  -3   4  -3 2115.62  135.67
  -3  -4  -3 2335.54  135.05
  -3  -4  -3 2243.43  110.98
  -9   0  -1   59.34   49.61
   9   0   1   -4.08   31.85
  -9  -2   6 7631.92  228.61
  -9  -2   6 7609.30  243.04
  -9   2   6 7313.45  235.42
  -9   2   6 7056.94  229.53
   9  -2  -6 7743.94  261.07
   9   2  -6 8222.60  246.74
  -8   3   2 6831.79  241.28
   8  -3  -2 7295.17  240.55
  -8  -3   2 6791.68  224.32
  -6   0  -5   22.35   28.33
   6   0   5   17.23   12.61
   6   0   5    8.94   16.85
  -6   0  -5   26.28   20.20
  -9  -2   1 1592.83  127.18
   9  -2  -1 1668.98  189.50
  -9   2   1 1620.26  106.91
   9   2  -1 1679.46   84.42
   2   3   6 1916.58   92.58
  -2  -3  -6 1751.87   96.63
   2  -3   6 2040.31  156.13
  -2   3  -6 1726.15  104.22
  -2  -3  -6 1879.49   92.28
   2   3   6 1839.60  108.30
   0  -3  -7 2270.85  137.87
   0   3   7 2099.85  111.45
   0  -3   7 2218.80  117.59
   0   3  -7 2146.16  117.05
  -5  -2  -5  435.90   47.75
  -5   2  -5  544.82   60.80
   5   2   5  379.52  104.75
   5   2   5  497.57  128.20
   5  -2   5  389.45  111.09
   5  -2   5  467.36  107.54
  -5  -2  -5  461.77   64.49
  -4  -4  -2 5346.60  168.93
   4  -4   2 5362.72  205.73
  -4  -4  -2 5341.69  160.11
  -4   4  -2 5291.86  213.81
   4   4   2 5659.09  192.46
   0   0  -9   20.52   14.38
   0   0   9   20.07   35.93
   0   0   9   -4.99   19.21
   6  -2   4 7917.63  270.67
  -6  -2  -4 8046.36  263.56
   6   2   4 7842.80  246.41
  -6  -2  -4 7353.10  220.32
  -6   2  -4 7938.95  252.15
   4  -2  -9  136.47   34.66
  -4  -2   9  214.07   85.99
  -4   2   9  206.72   50.21
  -4  -2   9  180.88   49.76
  -4  -2   9  181.46   89.56
   0  -4  -5 1344.41   98.83
   0  -4  -5 1283.02   76.77
   0   4   5 1331.96   95.94
   0  -4  -5 1279.83   68.56
   0   4  -5 1236.61  146.55
   0   4  -5 1412.04   85.65
   0  -4   5 1399.71  113.24
  10  -1  -2  372.69  115.78
 -10   1   2  456.59  148.68
  10   1  -2  393.27   91.93
 -10  -1   2  449.35  135.79
  10   1  -2  380.30   86.35
  10  -1  -2  441.97  103.11
  -7   0  -4   98.45   67.96
  -7   0  -4  148.07   37.01
   7   0   4   69.75   46.78
   7   0   4   56.21   56.15
   5   0   6  160.09   73.06
   5   0   6  142.34   45.76
  -5   0  -6  234.14   70.61
  -5   0  -6  158.30   46.14
   7  -3   1 2297.51  233.59
  -7  -3  -1 2297.61  119.58
   7   3   1 2242.42  139.53
  -7   3  -1 2316.24  126.60
  -3  -2   9 1052.28   79.70
  -3  -2   9  985.42   65.61
  -3   2   9 1127.39   62.46
  -3   2   9 1099.14   91.28
  -3  -2   9 1132.71   97.29
  -3   2   9 1083.63   25.58
  -8   0   9  -39.19   33.61
  -8   0   9   15.92   23.20
   8   0  -9   13.85   24.38
  -2   4  -4   92.12  102.53
   2  -4   4  175.08   55.29
   2   4   4  120.99   75.47
  -2  -4  -4  157.30   31.86
  -2  -4  -4  150.21   38.06
  -2  -4  -4  148.78   26.46
 -10  -1   6  447.33   71.37
 -10  -1   6  436.76  129.82
 -10   1   6  623.52  171.32
  10   1  -6  491.90   66.14
  10  -1  -6  438.44  133.70
 -10   1   6  522.60  152.86
  -5  -2   9  567.74  189.10
   5  -2  -9  461.33   37.36
  -5   2   9  544.99  158.04
  -5  -2   9  461.69   48.47
  -5  -2   9  340.98   54.31
   5   2  -9  505.21   48.98
  -5   2   9  479.05   56.81
  10   0  -1    5.62   15.47
  10   0  -1   23.76   21.88
 -10   0   1   32.56   18.71
   8  -3  -510468.05  316.55
  -8   3   5 9660.06  299.67
  -8   3   5 9866.64  302.56
  -8  -3   5 9985.86  291.47
   8   3  -510447.38  304.71
  -8  -3   5 9784.68  303.27
   4   2   6  561.57  176.64
  -4   2  -6  457.37   71.37
   4  -2   6  492.20  122.43
   4  -2   6  539.20  199.19
   4   2   6  478.79  111.63
  -4  -2  -6  584.21   81.97
  -4  -2  -6  556.62   52.67
  -4   0  10 1122.26   80.20
  -4   0  10 1043.70  153.84
  -4   0  10 1132.98   66.36
  -6   4   2 1517.37  104.76
   6  -4  -2 1519.64  152.66
  -6  -4   2 1655.76  117.02
  -6  -4   2 1547.96   75.10
  -6  -4   2 1600.77   77.04
  -7  -2  -3 1408.70   76.18
   7  -2   3 1195.98  166.41
  -7   2  -3 1433.38   92.87
  -7  -2  -3 1496.25  131.78
   7   2   3 1478.22   88.50
   7   2   3 1452.70   99.83
  -5   0  10 2366.22  119.56
   5   0 -10 2375.61  114.20
  -5   0  10 2338.32  145.99
  -2   1  -8   60.93   20.38
   2  -1   8  103.19   35.71
  -2  -1  -8   87.76   23.83
  -2  -1  -8   55.39   39.05
   2  -1   8  122.25   49.57
   2   1   8   82.33   29.05
   2   1   8   79.19   43.78
  -6   4   3   11.62   36.68
  -6   4   3   67.40   38.10
   6  -4  -3  -10.42   27.20
   6   4  -3   18.08    9.50
  -6  -4   3   21.48   30.39
  -6  -4   3   15.50   13.11
  -5  -4  -1  266.43   67.21
  -5  -4  -1  272.02   32.00
   5  -4   1  263.98  106.39
  -5   4  -1  250.38   92.31
  -5  -4  -1  247.52   35.03
   5   4   1  275.34   71.39
  -8  -3   1 4026.76  193.67
   8  -3  -1 4140.43  203.43
  -8   3   1 4083.16  196.93
   8   3  -1 4295.44  215.92
  -9  -1   8   -8.90   48.17
   9   1  -8   28.95   45.95
  -9   1   8   27.54   26.06
  -9   1   8  -16.14   41.98
  -9  -1   8   25.44   15.99
   9  -1  -8   12.28   37.95
 -10   0   7  -56.45   53.71
  10   0  -7   22.90   14.46
 -10   0   7   13.97   13.60
   9   1   1 6217.68  196.23
   9  -1   1 6246.17  208.59
  -9  -1  -1 6145.31  234.81
  -9   1  -1 6142.27  205.80
  -6  -1  -5  716.99   84.25
   6  -1   5  887.10   93.70
   6  -1   5  741.12  130.13
  -6  -1  -5  844.88   53.26
  -6   1  -5  769.71   59.47
   6   1   5  822.40   63.83
   6   1   5  807.73   98.24
  -6   1  -5  819.79   74.76
  -5   4   5   95.79   47.96
  -5   4   5  110.77   91.51
  -5  -4   5   99.11   32.08
  -5  -4   5   75.90   29.79
   5  -4  -5  118.70   46.35
   5   4  -5  185.08   44.03
   0  -1   9 2461.84  256.90
   0   1   9 2295.32  188.41
   0   1   9 2555.05  117.70
   0   1  -9 2429.72  138.86
   0  -1   9 2626.78  195.59
   0  -1  -9 2474.88  113.51
  -2  -2   9  963.91   49.01
  -2  -2   9 1022.03   96.51
  -2   2   9 1007.19  149.74
   2   2  -9 1031.66   50.18
  -3   0  10 2288.68  144.91
  -3   0  10 2185.80  109.52
  -3   0  10 2197.87  112.69
   6  -4  -1   19.96   41.93
  -6   4   1   36.26   26.05
  -6  -4   1   -8.34   37.22
   6   4  -1   26.46   29.40
  -8   0  -3  -11.82   24.64
   8   0   3   42.08   37.92
  -8   0  -3  -11.78   40.33
   8   0   3  -20.89   38.05
  -3  -3   8    7.19   31.20
   3  -3  -8   10.13    8.84
  -3  -3   8   54.22   47.31
  -3   3   8  -26.12   44.31
  -3   3   8   -4.23    6.87
   4  -3  -8  813.07   49.32
   4   3  -8  793.19   51.71
  -4  -3   8  685.54   44.08
  -4   3   8  846.93   99.77
  -4  -3   8  905.35  155.38
   4   0   7   12.03   35.28
   4   0   7   18.66   21.98
  -4   0  -7  -19.27   30.58
  -4   0  -7    5.73   15.47
   7   1   4  158.91   70.62
   7   1   4  137.42   72.44
   7  -1   4  104.43   57.08
  -7  -1  -4  234.24   57.63
  -7   1  -4  186.41   76.15
   7  -1   4  238.45   95.85
  -7  -1  -4  120.90   27.86
  -7   1  -4  224.93   54.98
  -1   2  -8 3241.35  156.29
   1  -2   8 3085.90  182.83
   1  -2   8 3261.67  157.24
   1   2   8 2899.30  146.73
   1   2   8 3032.72  131.52
  -1  -2  -8 3212.95  139.77
  -1  -2  -8 3463.84  166.61
   6  -2  -9 1124.87   70.39
  -6  -2   9 1139.24  124.77
  -6  -2   9 1101.31   89.87
  -6   2   9 1111.17  163.66
   6   2  -9 1121.43  145.86
  -6   2   9  956.60   47.40
   6   2  -9  986.20  121.88
  -5   1  -6  364.37  117.10
  -5  -1  -6  306.42   80.60
   5  -1   6  437.11  145.85
   5   1   6  426.05  105.46
   5   1   6  347.85   94.23
  -5  -1  -6  368.69   85.00
   5  -1   6  282.37   79.03
  -6   0  10  524.58   85.52
   6   0 -10  491.57   75.37
  -6   0  10  461.68   72.85
  -8   2   8 6303.45  211.20
   8  -2  -8 6856.14  213.19
  -8   2   8 6137.37  197.68
  -8  -2   8 6343.64  209.16
   8   2  -8 6739.26  216.22
  -8  -2   8 6205.05  200.34
   5  -3   4  421.62  109.64
   5   3   4  395.88   89.30
  -5   3  -4  286.55  150.33
   5   3   4  217.70   71.21
  -5  -3  -4  331.87   81.47
  -5  -3  -4  360.57   55.53
   8   1  -9 1030.55   73.11
  -8   1   9 1073.32  110.33
  -8  -1   9 1111.31  124.97
  -8  -1   9 1101.39   87.62
   8  -1  -9  965.84   68.80
   8   1  -9 1068.55  118.03
  -8   1   9 1037.70   61.51
  -6   4   4 3151.18  172.05
  -6   4   4 3253.35  234.41
  -6  -4   4 3163.16  195.55
  -6  -4   4 3331.80  152.85
   6   4  -4 3301.67  157.52
   6  -4  -4 3262.15  155.03
   1   4   5 3192.21  184.00
  -1  -4  -5 3048.98  155.31
  -1  -4  -5 3147.86  143.50
  -1  -4  -5 3380.76  160.89
  -1   4  -5 3070.83  158.04
   1  -4   5 3106.45  157.56
  10   1  -1  806.68   94.86
  10  -1  -1  836.13  197.41
 -10   1   1  867.59   81.51
  10   1  -1  682.30   76.45
  10  -1  -1  716.19  128.20
 -10  -1   1  878.85  121.52
  -7   3   7 1840.23  101.73
   7  -3  -7 2071.79  141.97
  -7   3   7 1728.26  168.34
  -7  -3   7 2065.97  204.37
  -7  -3   7 1839.17   99.99
   7   3  -7 1924.78  133.51
  -3   4   6  955.11  133.99
  -3   4   6  931.96   85.59
   3  -4  -6  808.74   40.54
  -3  -4   6  729.72  129.16
   3   4  -6  917.02   47.03
  -3  -4   6  834.24   59.12
   3  -4  -6  798.93   89.03
  -9  -2   7  153.18   40.15
  -9  -2   7  147.73   56.67
   9   2  -7  153.47   45.45
  -9   2   7  105.11   40.47
  -9   2   7  132.32   61.43
   9  -2  -7  109.14   69.20
  -9  -2   0 8671.42  272.19
   9   2   0 8900.78  260.19
   9  -2   0 8799.38  276.03
  -9   2   0 8681.58  280.41
   4   3   5 4643.45  149.39
  -4   3  -5 4556.01   86.34
   4   3   5 4965.24  162.81
  -4  -3  -5 4922.67  161.03
   4  -3   5 4547.70  130.78
  -4  -3  -5 5063.36  157.39
   2  -4  -6 3134.57  151.56
  -2   4   6 3082.22  146.40
   2  -4  -6 3085.39  145.25
   2   4  -6 3141.66  161.04
  -2  -4   6 3281.55  171.17
  -2   4   6 3032.35  189.11
   2   4  -6 3296.88  161.10
  -4  -1  10  427.62  120.50
  -4   1  10  357.14   54.99
  -4  -1  10  406.64   65.22
  -4   1  10  365.60   54.51
  -4  -1  10  436.03   64.05
  -4   1  10  427.12   39.20
  -2  -3   8  -19.81   34.01
  -2   3   8  -35.27   51.82
   2  -3  -8    7.46   19.92
   2   3  -8   21.96   14.61
   5   3  -8 3812.45  187.48
  -5   3   8 3476.86  214.62
  -5  -3   8 3540.87  230.10
  -5   3   8 3805.21  178.54
   5  -3  -8 3751.43  169.32
  -5  -3   8 3485.70  187.74
  -5  -1  10  147.29   81.70
  -5  -1  10  158.34   60.21
   5  -1 -10  276.45   39.91
  -5   1  10  217.69   63.10
  -5   1  10  216.20   89.36
  -5  -1  10  213.61   56.70
  -6  -3  -313265.11  380.76
  -6  -3  -312233.18  361.30
   6   3   312627.89  371.33
  -6   3  -312687.42  426.41
   6   3   313525.54  407.42
   6  -3   312106.75  468.29
  -1  -3  -7  255.55   82.25
  -1   3  -7  221.88  114.52
   1  -3   7  337.08   68.43
   1   3   7  264.18   79.38
  -1  -3  -7  271.96   21.31
  -1  -3  -7  257.39   29.92
  -3  -2  -7 5265.50  169.20
   3  -2   7 5158.85  189.02
   3   2   7 4954.47  166.07
  -3   2  -7 4923.39  201.11
   3  -2   7 5138.61  191.59
   3   2   7 5075.02  153.51
  -3  -2  -7 4909.15  155.46
  10   1  -7 5081.55  164.63
 -10  -1   7 5044.71  182.23
 -10   1   7 4496.91  100.01
 -10   1   7 4892.35  162.19
 -10  -1   7 4857.02  192.14
   8   3  -6   35.14   20.79
  -8   3   6   20.18   43.07
  -8  -3   6   -0.53   45.12
   8  -3  -6   86.26   36.53
  -8   3   6   65.37   53.56
  -8  -3   6   64.73   27.96
  -8   2  -2 8218.38  260.27
   8  -2   2 7831.00  264.47
   8   2   2 9201.89  285.29
  -8  -2  -2 8726.84  255.19
  -8  -2  -2 8636.68  286.83
   8   2   2 8428.90  248.86
  -2   0  1011593.23  339.46
  -2   0  1010612.05  330.84
  -2   0  1010812.17  319.93
  -4  -4   612210.40  360.68
   4  -4  -613686.57  396.17
  -4   4   612056.31  367.42
  -4  -4   612986.10  397.08
   4   4  -612816.79  378.77
  -4   4   612246.54  368.36
   0   5   0    2.37   26.04
   0  -5   0    6.29   20.66
   0  -5   0   19.83   19.60
   0  -5   0   20.03   23.23
  -3   1  10  299.16   57.31
  -3  -1  10  344.21   61.98
  -3   1  10  257.91  132.59
  -3  -1  10  306.32  117.63
  -3   1  10  333.57   82.16
  -3  -1  10  365.84   65.74
 -10   2   4 1836.85  115.09
  10   2  -4 2008.80  104.78
 -10  -2   4 1958.16  100.15
 -10  -2   4 2020.12  115.23
 -10   2   4 1945.53  123.00
  -8  -1  -3 4941.15  160.97
  -8   1  -3 4668.21  162.42
  -8   1  -3 4828.31  161.90
   8  -1   3 4727.96  166.51
   8   1   3 4706.55  196.22
   8   1   3 5087.38  176.64
  -8  -1  -3 4730.87  219.16
   1  -4  -6 6454.97  222.41
  -1  -4   6 5894.42  197.49
  -1   4   6 6373.45  202.29
   1   4  -6 5949.92  196.38
   1  -4  -6 5924.29  181.45
   1  -4  -6 6427.77  194.03
  -6  -4   0 5239.24  194.79
  -6   4   0 4976.08  176.14
   6   4   0 5585.39  183.86
   6  -4   0 5152.25  207.88
   4  -1   7  789.61  119.71
  -4   1  -7  766.01   41.48
   4   1   7  874.01   62.38
   4   1   7  735.72   89.23
  -4  -1  -7  761.16   33.42
   4  -1   7  821.18   53.65
  -4  -1  -7  848.53   59.80
  -1   0  -9   11.47   12.51
   1   0   9    3.78   20.38
   1   0   9  -12.62   39.11
  -1  -2   9  624.75   74.75
  -1   2   9  766.22   69.73
   1   2  -9  691.48   95.76
  -1  -2   9  740.22   55.70
   6   1 -10 3533.67  164.98
   6  -1 -10 3542.74  195.35
  -6   1  10 3395.12  158.12
  -6  -1  10 3314.86  168.74
  -6  -1  10 3385.86  164.87
  -6   1  10 3210.26  162.78
  -1   5   0   15.61   14.22
  -1  -5   0    7.70   21.27
   1  -5   0   -7.09   28.07
   1  -5   0  -28.63   32.05
  -1  -5   0  -10.38   22.79
   1   5   0   29.64   25.53
  -1  -5   0   39.26   16.46
   1  -5   0   19.40   18.86
  -8  -3   0 2105.68  130.52
   8   3   0 2121.98  152.52
   8  -3   0 1955.02  132.19
  -8   3   0 2284.07  130.03
   4   4   3 1398.40  147.13
  -4   4  -3 2056.46  139.43
  -4  -4  -3 1873.62  100.96
   4   4   3 1952.21  113.29
  -4  -4  -3 1919.62   93.54
   4  -4   3 1972.43  127.36
   0  -5   118881.57  554.28
   0  -5  -118695.31  543.04
   0  -5   118580.85  546.56
   0  -5  -118091.01  530.21
   0   5   117611.67  539.94
   0   5  -116573.45  492.09
   0  -5  -119236.85  568.18
  -1  -5   119402.03  561.56
  -1   5   117302.08  520.57
   1  -5  -116422.99  479.82
   1   5  -117443.42  518.61
  -1  -5   119078.74  555.28
   1  -5  -118119.62  529.65
   1  -5  -118424.79  537.27
 -10  -2   3  799.18   47.87
 -10   2   3  866.60  132.17
 -10   2   3  767.15  226.44
 -10  -2   3  730.53   75.38
  10   2  -3  795.98   39.73
   7   0 -10  205.59   66.22
  -7   0  10  220.39   85.72
  -7   0  10  242.49  100.60
  10   0   0 3161.90  154.55
  10   0   0 3319.76  165.13
 -10   0   0 3172.41  165.67
  10   2  -5  260.28   72.90
 -10  -2   5  410.29   66.69
 -10   2   5  405.77   47.52
 -10  -2   5  386.52  177.37
 -10   2   5  348.69  174.76
  -3  -3  -6  327.32   82.36
  -3  -3  -6  598.19   61.66
  -3   3  -6  599.60   42.93
   3   3   6  519.63  102.99
   3   3   6  520.89   71.05
   3  -3   6  661.63  157.56
  -3  -4  -4 1923.40  110.86
  -3  -4  -4 1396.11   91.14
  -3   4  -4 2156.58  141.43
   3  -4   4 2037.48  113.96
   3   4   4 1905.57   93.21
  -7   2   9 1251.34   73.98
   7   2  -9 1421.28  109.15
  -7  -2   9 1196.47   89.89
  -7   2   9 1267.84  162.90
  -7  -2   9 1297.87   93.79
   7  -2  -9 1335.04   92.55
 -11   0   4 1844.27  104.71
  11   0  -4 1859.06  104.63
 -11   0   4 1715.86  142.84
  -6   4   5    5.24   25.40
  -6  -4   5   86.95   42.09
  -6   4   5   85.52   52.03
  -6  -4   5   44.54   55.26
   6  -4  -5   63.99   33.80
   6   4  -5   56.51   41.72
  -1  -3   8   81.82   55.55
  -1   3   8   98.93   87.90
   1  -3  -8   83.88   51.94
   1   3  -8   81.08   66.68
  -9   0   9    3.91   31.91
  -9   0   9  -34.50   42.90
   9   0  -9   -6.05   28.47
  11   0  -5    3.36   22.05
 -11   0   5  -36.26   54.39
 -11   0   5   28.11   34.89
   7  -3   2   11.22   31.06
  -7  -3  -2  -30.61   31.64
  -7   3  -2   22.64   28.86
  -7  -3  -2   19.97   12.62
   7   3   2   10.27   12.40
   9   0   2  104.51   71.05
  -9   0  -2  317.75  118.25
  -9   0  -2  321.08   95.44
  -6   3   8 6394.19  263.19
   6   3  -8 7162.05  230.20
  -6  -3   8 7082.91  237.15
  -6   3   8 6955.54  210.76
   6  -3  -8 6051.12  183.21
  -6  -3   8 6727.18  227.97
   5  -4   2 2442.33  187.07
  -5  -4  -2 2425.91  112.31
   5   4   2 2645.46  137.78
  -5  -4  -2 2422.05  172.07
  -5   4  -2 2366.90  139.84
   3   0   8 6676.87  260.56
   3   0   8 5226.86  184.08
  -3   0  -8 6403.35  197.29
  -1  -5  -1 9132.33  287.57
  -1  -5  -1 8900.67  270.05
   1  -5   1 9001.96  279.11
  -1  -5  -110692.36  315.75
  -1  -5  -1 9305.31  300.29
   1  -5   1 9313.42  285.65
  -1   5  -1 8712.28  273.98
   2  -5  -1 3737.59  195.43
  -2  -5   1 3665.87  254.98
   2  -5  -1 3980.11  190.12
   2  -5  -1 3938.71  185.49
  -2   5   1 3556.53  176.27
  -2  -5   1 4191.18  189.33
  -2  -5   1 4008.68  181.68
 -10   0   812599.80  381.32
 -10   0   812463.68  378.16
  -5  -4   614881.92  436.37
  -5   4   613642.77  412.50
  -5  -4   613987.96  423.32
  -5   4   614105.51  413.78
   5  -4  -614727.80  427.04
   5   4  -614570.84  426.65
   1  -5  -2   77.73   25.77
  -1   5   2   93.85   55.12
  -1  -5   2  150.99   36.38
   1   5  -2  122.57   47.31
   1  -5  -2  128.62   32.47
  -1   5   2   89.53   48.40
  -2   1  10  299.36  108.15
  -2  -1  10  395.49  141.11
  -2  -1  10  320.26   44.24
  -2  -1  10  337.11   44.52
  -2   1  10  311.82   33.49
 -11   0   3    7.04   14.59
 -11   0   3   -2.39   49.78
  11   0  -3    7.69   19.72
  -2  -5   0  882.22   33.29
   2  -5   0  821.35   54.45
  -2  -5   0  908.76   56.75
   2  -5   0  951.71   56.25
  -2  -5   0  922.74  130.38
  -2   5   0  929.96   97.45
  -2  -5   0  896.16   35.03
  10  -2  -2 4597.33  227.68
  10   2  -2 4776.43  144.37
  10   2  -2 4392.57  199.76
 -10  -2   2 4532.73   88.73
 -10   2   2 4523.97  174.35
   0   5   2  447.28  104.16
   0   5  -2  461.48  141.65
   0  -5  -2  457.69   78.41
   0   5   2  286.89  140.61
   0  -5  -2  395.57   69.74
   0  -5   2  411.25   39.46
   9   3  -4  593.09   33.85
  -9  -3   4  790.88  113.91
  -9   3   4  984.02  199.75
  -9  -3   4  784.38   36.55
  -9   3   4  893.30  108.95
  -9   3   3 1430.27  213.87
  -9  -3   3 1651.07  182.79
   9   3  -3 1638.21   77.88
  -9   3   3 1742.51  167.68
  -9  -3   3 1591.99   76.36
   0  -4   6   43.84   32.83
   0  -4  -6   19.50   12.68
   0   4  -6   57.87   58.03
   0   4   6   43.90   21.82
   0  -4  -6   55.95   11.37
   0  -4  -6   28.04   17.70
   1  -1   9 7704.11  243.16
   1  -1   9 7572.78  247.36
   1   1   9 7304.50  220.36
   1   1   9 7260.38  284.17
  -1   1  -9 7506.88  231.64
  -1  -1  -9 7625.26  232.01
   2  -5  -2  286.01   87.04
  -2  -5   2  239.79   90.10
   2  -5  -2  318.60  108.67
  -2  -5   2  272.09   81.52
  -2   5   2  284.37   78.87
  -2  -5   2  269.53   30.76
  -2  -4  -5   27.22   17.69
  -2  -4  -5  109.17   24.50
  -2  -4  -5   69.53   28.40
  -2   4  -5   98.77   59.49
   2   4   5  143.95   62.68
   2  -4   5  136.41   54.90
   7  -1 -10  228.21   61.34
   7   1 -10  197.68   71.93
  -7   1  10  234.55  138.17
  -7  -1  10  259.61   83.91
  -7   1  10  335.87   80.88
  -7  -1  10  283.43   90.09
 -10  -2   6  669.28  113.91
  10   2  -6  650.55   62.72
 -10   2   6  474.13   54.80
 -10  -2   6  694.28   69.12
 -10   2   6  776.28   89.85
  -7   4   3  259.78  126.74
  -7  -4   3  243.65   42.48
  -7  -4   3  130.29   77.38
   7   4  -3  279.77   25.36
  -7   4   3  110.76   80.77
 -11   0   6 7405.49  246.86
  11   0  -6 7929.66  245.80
 -11   0   6 7089.04  227.94
 -10   1   0  906.46  170.80
  10  -1   0  948.77   66.22
  10   1   0 1088.82   77.43
 -10  -1   0  915.26   64.54
  10   1   0 1066.38   73.53
  10  -1   0  968.90  172.64
  -1   0  10 7756.76  252.08
   1   0 -10 7824.47  239.33
  -1   0  10 8399.15  250.61
  -7  -4   215500.61  463.79
   7  -4  -215522.72  475.19
  -7  -4   215193.79  429.93
  -7   4   215266.39  455.08
  11  -1  -4  218.03   95.32
 -11  -1   4  253.15   61.40
  11   1  -4  261.08   70.10
 -11   1   4  228.69  107.16
 -11  -1   4  157.38   92.21
 -11   1   4  275.96   79.62
  -9   1   9  158.62   84.81
  -9  -1   9  154.76  162.30
  -9   1   9  196.38  119.64
   9   1  -9  231.37   57.31
  -9  -1   9  304.01   73.91
   9  -1  -9  151.52   39.25
 -11   1   5  142.05   83.44
 -11  -1   5  256.52   69.03
 -11   1   5  284.51   86.18
  11   1  -5  186.41   55.64
 -11  -1   5  198.97  118.31
  -9   1  -2   42.57   27.87
   9   1   2   26.43   21.71
   9  -1   2   44.18   32.12
  -9   1  -2   28.18   22.33
  -9  -1  -2  -13.61   43.54
  -9  -1  -2   -3.35   17.62
   2   2   8 4390.63  216.60
  -2  -2  -8 4513.48   86.84
   2  -2   8 4343.21  253.27
  -2   2  -8 3924.55  214.94
  -2  -2  -8 4016.92  177.92
   2   2   8 4313.48  188.73
   2  -2   8 4263.66  201.13
  -9   3   524006.49  702.91
  -9  -3   524648.72  703.31
   9   3  -526021.35  742.39
  -9   3   525626.76  762.12
  -9  -3   525469.21  742.28
  -9  -3   2 4406.80  207.12
  -9   3   2 4821.68  174.84
   9  -3  -2 4894.14  170.46
   2  -5   1  305.96   96.41
  -2  -5  -1  237.72   74.28
  -2  -5  -1  274.55   58.75
  -2  -5  -1  277.12   44.70
  -2   5  -1  232.88  115.98
  -2  -5  -1  349.63   40.12
   3  -1   8  809.04   92.65
   3   1   8  814.29   45.21
  -3  -1  -8  846.81   73.73
   3   1   8  710.70   63.82
  -3   1  -8  788.30   44.12
  -3  -1  -8  832.03   64.10
   3  -1   8  807.00  105.86
   6  -4   1   90.39   54.32
   6   4   1   58.76   33.71
  -6  -4  -1   49.76    8.39
  -6  -4  -1   30.81   30.30
  -6   4  -1  -13.88   45.18
  -8   3   731855.10  951.52
  -8  -3   732603.16  931.86
  -8   3   731449.43  910.08
  -8  -3   731196.67  902.85
  -7   4   4 8153.55  259.49
   7  -4  -4 8632.67  264.90
  -7  -4   4 8009.88  253.44
  -7   4   4 8360.18  274.49
   7   4  -4 8522.52  262.96
  -7  -4   4 8669.24  255.42
  -9   2   8  863.83   62.22
  -9  -2   8  892.55  100.01
   9   2  -8  946.38   61.21
  -9  -2   8  869.84  106.20
  -9   2   8  825.22   69.23
   9  -2  -8  937.80   60.13
  -1  -5  -2 1804.38   94.95
   1   5   2 1763.49  106.62
  -1   5  -2 2026.05  143.08
  -1  -5  -2 2134.57  109.48
  -1   5  -2 1939.81  206.42
  -1  -5  -2 1899.96   95.96
   1  -5   2 1673.88   95.94
   9   2   1  147.97   31.36
   9   2   1   73.61   25.24
   9  -2   1   97.97   48.52
  -9   2  -1  230.84   63.64
  -9  -2  -1  161.62   68.43
  -6  -2  -5  121.96   43.37
  -6  -2  -5  193.99   37.99
  -6   2  -5  144.74   66.31
   6  -2   5   90.85   49.75
   6   2   5  157.84   48.61
   6   2   5  188.80   60.35
 -10  -1   8   40.04   34.56
  10   1  -8    6.34   18.19
 -10   1   8   12.64   30.78
  10  -1  -8   -0.15   34.25
 -10  -1   8   11.22   30.16
 -10   1   8   28.19   25.65
  -3   5   1  708.31   63.50
  -3  -5   1  796.23   74.67
  -3  -5   1  716.73   91.62
   3  -5  -1  797.84   67.56
  -3  -5   1  770.77   37.03
   8   0 -10  198.42   57.85
  -8   0  10  234.07   81.61
  -8   0  10  230.84   81.09
   0  -2   9  616.21   60.59
   0   2   9  602.68  121.96
   0   2  -9  607.64   67.94
   0  -2   9  634.74  175.67
 -11   1   3   56.22   54.91
 -11  -1   3   36.66   15.53
  11  -1  -3   98.84   51.12
  11   1  -3   80.10   23.02
 -11   1   3  101.12   52.77
 -11  -1   3   20.70   29.69
  11   0  -2  676.74   92.10
  11   0  -2  472.57   40.01
 -11   0   2  609.03  191.42
  -2  -3  -7 1279.09   63.71
   2   3   7 1315.23   67.29
   2   3   7 1268.87   86.95
  -2  -3  -7 1348.91   98.01
   2  -3   7 1477.34   97.52
  -2   3  -7 1401.35  122.03
  -3  -5   2   46.71   45.15
   3  -5  -2   20.95   22.78
  -3  -5   2   27.48   12.94
  -3   5   2   44.72   38.59
  -3  -5   2   58.80   26.58
  -1   5   3   13.45   39.78
   1  -5  -3   15.86   10.97
  -1   5   3    1.51   19.70
   1  -5  -3   12.44   18.79
   1   5  -3   40.97   31.53
  -1  -5   3   -3.12   27.57
   1   5  -3   24.74   22.15
   0  -3  -8  458.67  113.06
   0  -3   8  419.85  158.08
   0   3  -8  448.83   56.04
   0   3   8  385.36  159.03
   7   2   4 5809.25  186.97
  -7   2  -4 5311.85  185.53
  -7  -2  -4 5749.13  191.50
   7   2   4 5506.42  190.69
  -7  -2  -4 5786.93  175.62
   7  -2   4 5182.02  217.63
   7  -4  -1  128.29   52.44
  -7  -4   1   38.16   25.82
  -7   4   1   38.32   32.58
  -5   2  -6 7158.36  274.18
  -5  -2  -6 6801.21  218.76
   5   2   6 7279.20  225.56
  -5  -2  -6 7680.00  242.40
   5  -2   6 7154.37  241.75
   5   2   6 7521.59  227.70
  -7  -3   8 2285.43  141.43
  -7   3   8 2343.57  164.58
   7   3  -8 2525.22  125.42
  -7   3   8 2417.18  122.00
   7  -3  -8 2606.25  125.76
  -7  -3   8 2423.50  159.60
   2   5  -3  674.24   88.76
  -2   5   3  635.23   68.53
  -2  -5   3  603.78   63.94
   2  -5  -3  622.53   67.42
  -2   5   3  702.32   57.33
   2  -5  -3  650.59   70.77
  -7   0  -5  -14.17   31.21
  -7   0  -5   18.71   10.68
   7   0   5  -29.42   34.69
   7   0   5   24.65   25.93
   3  -5   0   53.96   35.42
  -3  -5   0   16.14   17.68
  -3  -5   0   57.98   27.12
  -3  -5   0   10.19    8.25
  -3  -5   0   25.10   23.50
  -3   5   0   29.34   23.51
  -8   3  -1 8506.00  288.03
   8   3   1 9119.58  283.18
  -8  -3  -1 8391.61  286.03
   8   3   1 8607.31  248.08
   8  -3   1 8664.42  289.52
  -6   0  -6   17.81   18.34
   6   0   6   -4.94   29.18
   6   0   6    5.52   46.31
  -6   0  -6   -2.16   24.95
  -8   2   9  440.90  107.32
  -8   2   9  343.56   78.89
   8   2  -9  279.93  126.60
   8  -2  -9  389.94   42.96
  -8  -2   9  418.55   95.56
  -8  -2   9  363.44  169.14
 -11  -1   6  380.76   38.47
 -11   1   6  378.44  107.67
 -11  -1   6  252.61  150.96
 -11   1   6  402.52  145.60
  11   1  -6  320.53   48.30
  -6  -4   6 1412.07   76.24
   6   4  -6 1758.10   90.25
  -6  -4   6 1443.54  185.64
   6  -4  -6 1447.82   76.12
  -6   4   6 1411.60  147.39
  -6   4   6 1296.82  101.47
  -1  -1  10  679.52   74.76
  -1   1  10  758.93   93.01
   1   1 -10  729.97   38.85
  -1   1  10  814.91   45.53
  -1  -1  10  742.45   79.99
  10   2  -1 1318.83   81.07
  10  -2  -1 1178.74   91.05
  10   2  -1 1324.67   65.43
 -10   2   1 1314.50  179.77
 -10  -2   1 1263.57  106.19
  -3  -4   7  288.74   81.30
  -3  -4   7  217.09  115.80
   3   4  -7  306.18   98.64
  -3   4   7  158.46  111.63
   3  -4  -7  214.83   16.95
  -3   4   7  216.62   42.10
   0   5   3  551.88   68.49
   0   5  -3  601.03  156.28
   0   5  -3  563.15   44.97
   0  -5  -3  512.54   81.63
   0  -5   3  588.53  152.39
   0  -5  -3  608.11   54.41
  -4  -2  1016966.39  522.10
   4  -2 -1017245.82  490.92
  -4   2  1017201.93  513.19
  -4  -2  1016443.12  492.40
  11   0  -7   -0.70   30.19
 -11   0   7  -11.15   53.01
 -11   0   7   25.68   23.06
  -5  -2  1021440.67  627.02
  -5   2  1021629.49  621.61
   5  -2 -1023213.59  661.33
  -5   2  1021574.92  635.63
  -5  -2  1023057.35  683.52
  -4   4   7  327.27   60.04
  -4  -4   7  316.14  140.89
  -4  -4   7  291.94   96.67
  -4   4   7  294.81  120.63
   4  -4  -7  304.13   51.83
   4   4  -7  260.93   48.20
  -1   4  -6 6140.07  203.75
  -1  -4  -6 6596.64  203.24
   1  -4   6 6328.63  207.29
  -1  -4  -6 5956.66  186.68
  -1  -4  -6 6115.47  182.02
   1   4   6 6197.30  196.87
  -7  -4   5   67.97   24.88
  -7  -4   5   59.43   35.11
   7  -4  -5   86.78   54.41
  -7   4   5   46.39   24.98
  -7   4   5   96.88   66.82
   7   4  -5   95.57   32.15
  -2  -4   7  708.27   53.32
   2   4  -7  583.43   46.93
   2  -4  -7  679.39   64.40
  -2   4   7  633.36  101.40
   2  -4  -7  677.21   21.41
 -10  -2   7  -11.57   21.03
  10   2  -7  -15.49   25.57
 -10   2   7   39.51   39.26
 -10  -2   7   -1.02   49.84
 -10   2   7  -18.34   47.76
  -3  -5   3  257.03   76.41
  -3  -5   3  364.70   46.85
  -3   5   3  275.61   75.15
   3  -5  -3  315.35   83.32
  -3   5   3  425.91  123.63
   3   5  -3  335.02   35.64
  -9   3   6   21.70   35.78
  -9   3   6    6.61   52.67
   9   3  -6   42.13   21.81
  -9  -3   6   45.72   16.84
   9  -3  -6   27.60   39.17
  -9  -3   6   49.34   49.46
  -8   0  -4 5006.64  165.15
  -8   0  -4 6130.94  196.41
   8   0   4 5765.98  233.85
  -9   3   1  514.17  127.22
   9  -3  -1  460.85  121.57
  -9  -3   1  253.99  119.65
 -10   0  -1   34.24   44.27
  10   0   1    9.35   17.53
  10   0   1   41.55   25.99
  -8  -1  10  383.10   61.06
  -8   1  10  361.55  128.03
  -8   1  10  314.14  100.42
   8   1 -10  301.62   92.16
   8  -1 -10  309.16   28.16
  -8  -1  10  349.93   58.54
   5   3   5 1744.88  108.23
  -5   3  -5 1645.97  105.05
   5  -3   5 1657.47  167.45
  -5  -3  -5 1535.32  101.74
  -5  -3  -5 1838.23  100.73
   5   3   5 1777.82   92.37
   2   0   9  107.57   96.49
   2   0   9   -0.73   20.15
  -2   0  -9   -6.81   17.95
  -5   0  -7   -1.56   25.86
   5   0   7   32.42   30.55
   5   0   7   14.52   21.27
   6  -3   4  171.71   78.97
   6   3   4  247.29   47.52
  -6  -3  -4  188.69   41.46
   6   3   4  178.66   55.43
  -6   3  -4  220.35   61.81
  -6  -3  -4  227.11   56.93
 -11  -1   2  510.30  143.75
  11   1  -2  413.33   55.43
 -11   1   2  503.91  136.58
  11   1  -2  464.06  111.25
  11  -1  -2  425.76  101.74
  11  -1  -2  296.11  110.79
  -3   2  10 5094.91  148.85
  -3   2  10 4966.65  147.21
  -3   2  10 4862.45  203.49
  -3  -2  10 4658.98  159.64
  -3  -2  10 4831.60  222.85
  -2  -5  -2 1531.00   85.78
  -2   5  -2 1535.94  145.12
   2   5   2 1468.10  121.69
   2  -5   2 1541.62   96.20
  -2  -5  -2 1685.65   97.54
  -2  -5  -2 1558.81   80.75
  -4  -3   9 8149.55  260.12
   4  -3  -9 8758.76  252.39
  -4  -3   9 7848.20  264.51
  -4   3   9 8434.25  270.97
   8  -2   3  721.61   90.93
  -8  -2  -3  873.00   67.90
  -8  -2  -3  778.26  106.35
   8   2   3  735.42   65.81
   8   2   3  711.12   78.19
  -8   2  -3  887.71  139.62
   4  -4   4 3380.38  189.60
  -4  -4  -4 3627.58  162.22
   4   4   4 3509.37  157.85
   4   4   4 3766.89  181.53
  -4  -4  -4 3455.10  158.37
  -4   4  -4 3412.31  228.73
   4  -2   7 3280.60  214.36
  -4   2  -7 3035.11  152.80
   4   2   7 3303.06  151.25
  -4  -2  -7 3002.79  136.39
   4   2   7 3027.33  146.32
  -4  -2  -7 3296.09  153.87
   5  -4   3  363.50   63.68
   5   4   3  390.14   78.63
  -5  -4  -3  415.56   94.31
  -5  -4  -3  360.46   46.68
  -5   4  -3  425.43  124.24
  -3  -5  -1  366.90   68.49
  -3  -5  -1  604.87   74.93
  -3   5  -1  649.12   88.16
  -3  -5  -1  715.08   50.75
   3  -5   1  568.47   55.40
  -3  -5  -1  583.65   74.55
  -6  -2  10 9576.90  303.02
   6  -2 -10 9825.04  286.62
  -6   2  10 9878.51  290.39
  -6   2  10 9792.39  308.08
  -6  -2  10 9296.11  303.77
   7   1   5   13.11   21.14
  -7   1  -5   29.21   32.55
  -7  -1  -5   43.60   20.71
   7   1   5   50.22   30.97
   7  -1   5   26.92   47.14
  -7  -1  -5   12.22   18.09
  -3  -3   910031.51  306.42
  -3   3   910330.03  320.66
  -3  -3   9 9756.41  308.85
  -6  -1  -6   62.50   30.91
  -6   1  -6  111.65   59.66
   6   1   6   34.13   26.50
   6   1   6   39.53   31.53
   6  -1   6   54.14   28.38
   6  -1   6   56.26   39.85
  -6  -1  -6   50.10   27.37
   0   0  10  923.08  119.97
   0   0  10 1025.37   42.97
   0   0 -10  943.09   77.19
  -5  -3   9 6713.97  226.59
  -5   3   9 6561.76  271.31
  -5  -3   9 6891.99  257.02
   5  -3  -9 7187.18  210.67
   4  -5  -2  -28.33   44.40
  -4   5   2   29.17   36.11
  -4  -5   2   -1.05   37.34
  -4  -5   2   18.93   10.94
  -4  -5   2    4.62    8.89
   4  -5  -2   26.36   33.60
  -7   4   0 9859.19  342.71
   7  -4   0 9923.78  313.49
  -7  -4   010374.08  364.60
  -4  -5   1   18.49   16.91
  -4   5   1   -1.61   40.00
  -4  -5   1   29.55   23.49
   4  -5  -1   60.44   34.72
  -4  -5   1    3.29   20.76
  -1  -5  -3   29.45   23.82
   1  -5   3   29.94   25.46
  -1  -5  -3   35.26   17.94
  -1  -5  -3   24.44   11.55
  -1   5  -3    0.09   40.72
   1   5   3   60.31   33.80
 -10   0   9   48.17   35.12
 -10   0   9    6.00   35.31
  -5   4   7  722.70   63.24
  -5  -4   7  667.68   62.04
   5   4  -7  747.74   67.70
  -5  -4   7  736.70  250.80
  -5   4   7  591.29  186.79
   5  -4  -7  642.35   29.75
  -5   0  11    7.21    9.02
  -5   0  11   22.77   13.87
  -5   0  11   53.67   27.09
  -4  -3  -6   27.68   16.25
  -4   3  -6   16.47   25.26
  -4  -3  -6   14.22   18.27
   4   3   6   39.85   21.90
   4   3   6    7.79   11.76
   4  -3   6  -21.06   49.98
  11   0  -1   32.98   24.53
  11   0  -1  -29.53   27.73
 -11   0   1  -42.35   47.25
   1  -4  -7  698.77   73.51
   1  -4  -7  709.56   31.31
  -1  -4   7  660.05   56.60
   1  -4  -7  690.19   66.02
   1   4  -7  682.70   57.83
  -1   4   7  639.72  124.13
  11   1  -718665.82  542.77
 -11  -1   718259.67  565.24
 -11   1   717265.50  515.00
 -11   1   718791.85  555.36
 -11  -1   717991.50  529.53
   7   3   313605.81  403.16
  -7  -3  -313062.03  375.03
  -7   3  -312562.54  412.15
  -7  -3  -313396.34  396.77
   7  -3   312259.04  375.26
  -4   0  11   16.08   16.83
  -4   0  11  -13.79   22.88
  -4   0  11   -7.97   44.07
  -3  -4  -5   27.32   18.40
   3   4   5   -0.55   22.89
  -3  -4  -5   10.83   12.86
  -3   4  -5  -30.07   44.73
   3  -4   5  -27.22   43.71
  -2  -5   4   56.53   27.01
  -2   5   4   35.02   29.39
   2  -5  -4   78.22   30.27
   2  -5  -4   50.40   37.17
   2   5  -4   59.85   32.86
  -2   5   4   87.89   34.35
   2   5  -4  118.29   63.15
  -8  -1  -4  236.76   30.72
   8  -1   4  217.91   67.05
  -8   1  -4  214.95   73.84
   8   1   4  127.05   40.14
  -8  -1  -4  249.99   76.02
   8   1   4  206.93   73.63
  -6   0  11    5.96   22.66
   6   0 -11   -4.39   13.06
  -6   0  11  -10.55   35.49
 -10  -1  -1 3391.87  234.52
  10   1   1 2744.85  131.46
 -10   1  -1 3243.56  169.80
  10  -1   1 3670.55  188.10
  10   1   1 4052.13  192.16
  -1  -5   4   65.63   32.17
   1   5  -4   68.78   66.07
   1  -5  -4   68.84   39.12
  -1   5   4   87.96   38.81
  -1   5   4   50.71   40.03
   1  -5  -4   72.17   26.20
   1   5  -4   33.47   41.65
  -6   4  -2 2912.40  137.20
   6   4   2 2926.27   90.14
   6  -4   2 2847.84  119.87
   6   4   2 2922.28  105.45
  -6  -4  -2 2878.56  137.93
  -6  -4  -2 2899.64   89.08
   2   2 -10   35.59   30.51
  -2   2  10   33.40   53.96
  -2  -2  10   48.43   38.76
  -2  -2  10   33.23   41.16
   4   5  -3   12.77   17.64
  -4   5   3   65.73   55.67
  -4  -5   3   -6.69   18.46
  -4   5   3    6.80   20.10
  -4  -5   3   15.56   24.14
   4  -5  -3   22.80   18.12
  -2  -1  -9 4438.35  135.75
   2  -1   9 3930.94  198.48
   2   1   9 4294.76  162.90
   2   1   9 4719.42  142.19
  -2   1  -9 4139.80  140.26
   2  -1   9 4638.72  146.98
  -5  -1  -7 4915.99  165.87
  -5  -1  -7 5361.43  170.10
  -5   1  -7 4959.38  169.58
   5  -1   7 5173.71  224.88
   5   1   7 5922.29  185.70
   5  -1   7 4991.80  160.59
   5   1   7 4885.34  161.17
  -2   3   910487.30  301.37
  -2  -3   910369.83  262.81
   2   3  -910616.99  272.07
  -9   0  10   57.41   42.44
  -9   0  10   84.38   32.69
   9   0 -10   47.37   42.13
  -4  -5   0   16.09   15.54
  -4  -5   0    6.98   14.82
   4  -5   0   54.73   37.61
  -4   5   0  -19.57   39.46
  -4  -5   0    9.20    5.96
  -9   0  -3    5.61   44.14
  -9   0  -3  -11.15   23.87
   9   0   3   11.65   20.77
   3  -5  -4  -16.18   17.58
   3   5  -4   14.05   26.53
  -3   5   4   25.24   44.04
  -3  -5   4  -43.13   35.70
  -3  -5   4    3.01   19.92
  -3   5   4   20.53   22.52
  -1   3  -8   68.56   81.31
   1  -3   8  109.92   54.77
   1   3   8   97.00   64.06
  -1  -3  -8   88.65   43.28
  -6   3   9 2828.42  123.33
  -6   3   9 2881.75   95.58
  -6  -3   9 2910.11  109.31
  -6  -3   9 2993.78  195.19
   6  -3  -9 3076.24   96.72
   1  -2   9  704.05   93.23
   1  -2   9  715.52  217.41
  -1   2  -9  747.03   50.48
   1   2   9  639.82  124.83
   8   3  -8   58.09   39.00
  -8   3   8   42.21   51.38
  -8   3   8   54.51   33.51
   8  -3  -8   20.05   36.57
  -8  -3   8   61.50   54.92
  -8  -3   8   11.72   17.99
   4   0   8  -11.93   24.47
  -4   0  -8   16.97   15.06
  -3   0  11  -17.49   24.59
  -3   0  11  -22.46   49.66
  -3   0  11   13.93   18.07
  -7   2  10 9714.50  294.34
  -7   2  10 9200.81  234.59
  -7  -2  10 9476.44  241.22
  -7  -2  10 9743.55  301.90
   7  -2 -1010005.36  234.19
   0   1  10  630.61   50.12
   0  -1  10  669.08   63.24
   0   1 -10  681.86   40.20
   0  -1  10  583.62   66.10
   0  -1 -10  638.51   44.83
   0   1  10  580.95   57.89
   7  -4  -6 7441.24  189.62
  -7  -4   6 7216.87  205.07
   7   4  -6 7578.46  191.30
  -7   4   6 7345.70  204.39
  -7   4   6 7022.24  197.98
  -7  -4   6 7268.28  177.47
 -10  -2   030421.10  697.05
  10   2   031463.18  706.68
  10   2   031708.30  725.48
  10  -2   031297.62  717.55
 -10   2   030202.06  698.96
 -11   0   829662.98  678.81
 -11   0   829287.30  704.57
 -10   1   9  530.13   78.55
 -10  -1   9  543.38   46.20
 -10   1   9  592.28  188.55
 -10  -1   9  668.54  163.06
  10  -1  -9  619.50   58.18
  -8   4   3  172.16   85.42
  -8  -4   3  165.37   31.32
  -8  -4   3  238.70   57.79
  -8   4   3   81.39   43.83
   8   4  -3  218.18   31.08
  -5  -1  1111600.77  289.88
  -5   1  1111443.43  264.65
  -5  -1  1111737.45  280.62
  -5  -1  1111377.57  285.42
  -5   1  1111073.51  355.01
   0   5   4 2450.51   91.63
   0  -5  -4 2518.51   88.36
   0  -5   4 2524.74   99.59
   0  -5  -4 2734.92  102.19
   0   5  -4 2470.02  110.10
   0  -5  -4 2496.55   87.57
 -11   2   4 2744.33  129.67
  11   2  -4 2946.82   94.11
 -11  -2   4 2853.37  115.18
 -11  -2   4 2712.88  115.86
 -11   2   4 2607.03  114.43
  -9   3   7 5190.67  196.82
  -9   3   7 5034.08  199.62
   9  -3  -7 5260.26  176.32
   9   3  -7 4440.66  139.64
  -9  -3   7 5241.85  169.36
  -9  -3   7 5189.29  186.00
  -9   3   0  293.75  118.66
   9  -3   0  211.93  100.17
  -9  -3   0  215.61   81.72
  11   1  -1 3551.45  133.18
  11   1  -1 3619.07  120.73
 -11   1   1 3403.56  225.88
 -11  -1   1 3465.93  162.79
  11  -1  -1 3334.80  128.82
  -9  -2   9   86.98   61.72
  -9   2   9  112.42   34.90
  -9   2   9   69.00   28.51
   9  -2  -9  121.30   30.65
  -9  -2   9   85.46   59.71
   9   2  -9  101.11   61.37
  -4  -1  11 1766.66   57.94
  -4   1  11 1602.63   79.13
  -4  -1  11 1651.46   69.26
  -4  -1  11 1808.83   72.06
  -4   1  11 1914.76   72.60
  -4   1  11 1641.53   93.05
 -11   2   5    5.09   18.83
 -11  -2   5   -6.97   30.80
 -11   2   5  -31.87   36.37
 -11  -2   5   24.64   15.92
  11   2  -5   14.05   12.57
   9  -2   2 6441.16  161.01
  -9  -2  -2 7023.80  231.48
  -9  -2  -2 7023.51  167.76
   9   2   2 6672.27  162.37
  -9   2  -2 6673.82  202.36
  -8  -4   410537.81  241.30
  -8   4   4 9966.89  250.60
   8   4  -410896.66  248.51
  -8   4   410693.43  322.14
  -8  -4   410034.10  306.28
   3   2   811421.24  293.61
  -3   2  -811731.86  310.96
  -3  -2  -812503.85  299.66
   3   2   812063.18  280.03
  -3  -2  -812028.81  283.14
   3  -2   811408.99  290.88
   3  -5   2 2251.06  148.61
   3   5   2 2148.64   56.43
  -3  -5  -2 2078.13   54.88
  -3   5  -2 2176.01  223.46
  -3  -5  -2 2133.13   53.79
  -3  -5  -2 2367.30  152.42
  -7   0  11    2.83   20.55
   7   0 -11   17.41   14.58
  -7   0  11   28.46   23.34
  -6   4   7  452.95  175.54
  -6  -4   7  566.20   70.07
  -6  -4   7  640.64  188.88
   6   4  -7  666.66   57.76
   6  -4  -7  521.11   43.75
  -6   4   7  578.51   56.08
   3  -3   7  404.30  111.89
  -3   3  -7  341.94   87.74
  -3  -3  -7  331.47   98.82
  -3  -3  -7  256.15   21.26
   3   3   7  363.13  104.90
   3   3   7  357.36   57.93
   8  -4  -218618.14  482.16
  -8   4   218037.24  426.84
  -8  -4   219500.76  459.88
 -10  -2   8  723.74   81.61
 -10   2   8  713.50   67.41
 -10   2   8  690.38   68.44
  10   2  -8  631.77   82.60
 -10  -2   8  752.83  104.78
  10  -2  -8  732.66   97.65
  -2  -4  -634307.87  760.54
  -2   4  -635788.38  845.54
  -2  -4  -633784.94  749.23
   2   4   636362.13  817.21
  -2  -4  -636179.73  808.57
   2  -4   635696.87  828.75
  -6  -1  1111572.39  280.97
  -6   1  1112122.06  294.86
  -6  -1  1112193.88  294.40
   6  -1 -1112299.25  286.40
  -6  -1  1111993.10  295.82
  -6   1  1112635.31  317.22
   2  -5   3  225.28   66.46
  -2  -5  -3  176.50   46.95
  -2   5  -3  130.03  100.80
   2   5   3  232.51   67.95
  -2  -5  -3  123.35   48.59
  -2  -5  -3  160.94   44.14
   0  -4  -7   93.01   27.23
   0  -4  -7  158.95   33.53
   0   4  -7  203.87   69.19
   0  -4  -7   98.20   49.11
   0   4   7  191.53   65.89
   0  -4   7  285.97   91.66
  -8  -3  -2  226.73   31.88
   8   3   2  165.20   78.82
  -8  -3  -2  158.42   76.78
  -8   3  -2  204.18   70.63
   8  -3   2  327.93   95.45
 -11  -2   3   18.41   28.29
 -11   2   3   23.99   39.57
  11   2  -3   13.10   11.25
   9  -1 -10  183.06   62.35
  -9  -1  10  307.12  114.97
  -9  -1  10  219.61  107.76
  -9   1  10  329.97  118.18
  -9   1  10  270.93  134.09
   4   5  -4   66.01   28.80
  -4   5   4   99.16   31.87
   4  -5  -4   57.70   22.81
  -4  -5   4   51.49   23.73
  -4  -5   4  135.61   37.83
  -4   5   4   81.73   39.69
  -9   1  -314175.70  359.36
  -9  -1  -315374.49  357.55
   9   1   315004.47  365.30
   9  -1   314251.13  468.63
  -9  -1  -315378.14  366.78
 -10  -3   4   38.36   14.37
 -10  -3   4   56.31   42.24
 -10   3   4   80.90   42.67
 -10   3   4   33.01   32.51
  10   3  -4   57.37   15.36
  -4  -5  -1 2611.14   84.18
  -4  -5  -1 2482.57   82.97
  -4   5  -1 2615.88  119.12
  -4  -5  -1 2608.11  148.19
   4  -5   1 2481.33  111.81
  -4  -5  -1 2409.93   90.33
   1   3  -9 8545.58  220.95
  -1   3   9 8690.83  228.80
  -1  -3   9 8575.97  267.00
  -5  -5   2   22.72   20.33
   5  -5  -2   33.80   35.91
  -5  -5   2   10.35   10.44
  -5  -5   2   34.13   26.44
  -5   5   2   -4.36   31.81
  -7   4  -1   25.85   36.83
   7  -4   1  105.40   66.60
   7   4   1   22.44   25.97
  -7  -4  -1   -8.72   32.20
  -4   1  -8  123.36   41.51
   4   1   8  101.05   40.25
   4  -1   8   86.84   50.17
   4   1   8  127.11   37.01
   4  -1   8   83.45   47.74
  -4  -1  -8  139.27   33.39
  -3  -1  11 5149.64  161.77
  -3   1  11 5183.83  200.63
  -3  -1  11 4747.15  152.95
  -3   1  11 4955.41  146.63
  -3  -1  11 5084.82  175.92
  -3   1  11 4798.62  145.33
  10   3  -311120.15  249.75
 -10  -3   310173.80  259.92
 -10   3   310581.55  270.69
 -10   3   310148.26  263.42
  11   2  -6   -5.75   18.59
 -11   2   6   23.84   27.60
 -11   2   6  -15.40   47.30
 -11  -2   6  -29.65   52.80
 -11  -2   6   18.06   20.16
 -12   0   5   28.73   24.08
  12   0  -5   -4.52   14.07
 -12   0   5   35.79   38.95
  -1   2  10   35.33   35.46
  -1  -2  10  -20.00   37.28
   1   2 -10   -1.47   29.92
  -1  -2  10    7.72   26.13
 -11   1   8   28.79   16.12
  11   1  -8   27.44   28.29
 -11  -1   8   56.32   28.46
 -11   1   8   35.34   30.54
 -11  -1   8   25.12   24.97
 -10   3   5 6236.89  117.17
 -10   3   5 6758.90  242.64
 -10  -3   5 6594.01   63.20
 -10  -3   5 6446.98  183.52
  10   3  -5 7000.60  167.65
  -2   0  11   15.22   41.01
  -2   0  11   -0.38   13.89
  -2   0  11  -27.64   22.17
   7  -3  -9 7031.95  183.20
  -7   3   9 6669.77  168.32
  -7  -3   9 6703.74  175.53
   7   3  -9 7138.03  183.26
  -7   3   9 6513.38  124.17
  -7  -3   9 6863.40  194.15
 -12   0   4 1416.58  133.03
 -12   0   4 1356.71  131.22
  12   0  -4 1519.05  143.95
  -8   4   5   41.63   32.27
  -8  -4   5   29.34   21.06
  -8  -4   5   21.95   40.35
  -8   4   5   39.72   29.47
   8   4  -5   53.60   17.09
  -5  -5   1 1964.47  134.16
   5  -5  -1 2273.56  590.09
  -5  -5   1 1743.72   42.17
  -5  -5   1 1846.86   52.02
  -5   5   1 1738.19  152.57
   5   5  -3  330.08   53.03
  -5  -5   3  239.15   75.23
  -5  -5   3  280.00   69.64
  -5   5   3  255.08   76.49
  -5   5   3  247.10   67.64
   1   5   4 2246.00   64.55
  -1  -5  -4 1962.29   67.74
   1  -5   4 2205.50   78.91
  -1   5  -4 2136.67  201.15
  -1  -5  -4 2217.54   80.34
  -1  -5  -4 2188.12   98.29
  11   0   0 3517.62  144.35
  11   0   0 3673.67  126.07
 -11   0   0 3378.55  131.99
  -7  -1  11 2036.93   78.50
  -7  -1  11 1924.00   79.27
  -7   1  11 2212.13   88.20
  -7   1  11 1992.42   92.22
   7   1 -11 2093.92   86.83
  -8   4   1  397.85  120.41
  -8  -4   1  417.39  120.81
   8  -4  -1  517.18  135.03
   1   0  10  218.97   44.28
  -1   0 -10  168.99   45.36
   1   0  10   96.43   58.69
  12   0  -6 2949.98  129.94
 -12   0   6 2703.20  201.66
 -12   0   6 2713.46  105.61
  -2  -5   5  361.86   94.36
   2   5  -5  379.53  204.06
   2  -5  -5  206.51   67.74
  -2   5   5  402.89   96.35
   2   5  -5  372.90  106.43
  -2   5   5  482.51   82.27
  -8  -2  10 7056.50  196.47
  -8   2  10 6944.05  247.69
  -8   2  10 7017.46  238.99
  -8  -2  10 7358.97  197.23
   8  -2 -10 7986.82  209.02
  10   0   2    8.46   18.35
 -10   0  -2    1.39   30.25
 -10   0  -2   33.09   20.84
  11   2  -2 7747.78  186.02
 -11  -2   2 7733.34  206.61
  11   2  -2 7227.54  172.76
  11  -2  -2 7192.28  196.56
 -11   2   2 6926.51  190.65
  -3   5   5 3103.12  157.61
  -3  -5   5 3046.44  128.89
   3   5  -5 3367.29  119.47
  -3   5   5 3230.35  148.03
   3  -5  -5 3220.70  104.07
  -3  -5   5 3157.42  163.41
 -10   3   2  771.50  128.12
  10  -3  -2  912.09  221.68
  10   3  -2  457.52   15.48
 -10  -3   2  768.26   96.27
   8   0 -11   -5.04   23.75
  -8   0  11    5.10   13.19
  -8   0  11   -2.51   35.28
  -3  -4   8  443.57   56.45
  -3   4   8  426.06  133.34
  -3  -4   8  397.11  144.77
   3  -4  -8  459.08   24.46
   4  -4  -8 2152.01   42.73
  -4  -4   8 2201.47  141.83
  -4  -4   8 2159.45  108.51
  -4   4   8 2230.61   71.36
  -4   4   8 2182.46   86.75
  12   0  -3   29.08   23.39
 -12   0   3   43.66   44.61
  12   0  -3   15.59   15.89
  -3   0  -9    0.22    7.80
   3   0   9   -2.09   13.86
   3   0   9  -17.89   35.50
  -1   5   5   21.74   14.43
   1  -5  -5   66.06   19.88
  -1   5   5   30.02   20.05
   1   5  -5   61.59   31.94
  -1  -5   5   14.19   19.45
   1  -5  -5   43.81   21.69
   7   2   5  495.58  116.02
  -7  -2  -5  533.83   98.79
  -7   2  -5  610.97   56.75
  -7  -2  -5  543.27   71.90
   7  -2   5  533.52  133.67
   7   2   5  495.03  112.66
   5   4   4  369.44   77.87
  -5  -4  -4  462.25   52.55
  -5   4  -4  424.80  143.55
   5  -4   4  418.30  130.20
  -5  -4  -4  410.76   99.65
   5   4   4  490.35   52.99
   6   2   6 8782.17  231.11
  -6   2  -6 8861.90  248.11
  -6  -2  -6 8886.66  216.26
   6  -2   6 8940.69  253.64
  -6  -2  -6 9886.70  236.32
   6   2   6 9867.10  239.45
  -5  -5   0  120.03   24.14
  -5   5   0   89.11   48.44
  -5  -5   0  141.99   32.53
  -5  -5   0   65.39   28.91
   5  -5   0  121.46   55.16
 -10  -3   6  121.30   85.03
  10   3  -6  106.75   38.51
 -10  -3   6  111.24   29.62
 -10   3   6   67.15   23.22
 -10   3   6   79.39   46.25
  12   1  -5   -1.13   22.36
 -12  -1   5   11.34   14.82
 -12   1   5   25.69   32.05
 -12  -1   5   20.03   14.00
 -12   1   5   -3.03   54.09
  -5   5   4  120.51   84.35
  -5  -5   4  235.72   88.93
  -5   5   4   92.15   93.28
  -5  -5   4  244.58   78.41
   5   5  -4  231.27   70.51
   5  -5  -4  201.21   57.45
  -2  -1  1119453.82  447.89
  -2   1  1117367.53  419.72
  -2  -1  1117763.09  423.89
  -2   1  1118887.03  425.63
  -2  -1  1117660.58  432.10
 -12  -1   4   -0.23   42.20
 -12  -1   4   39.38   23.65
 -12   1   4  -54.08   56.76
 -12   1   4   66.09   34.86
  12   1  -4   30.06   28.27
  -7   4   7  450.98  146.18
  -7   4   7  415.08  124.24
  -7  -4   7  413.94  112.71
   7   4  -7  474.09   39.58
   7  -4  -7  422.96   37.49
  -7  -4   7  427.94   98.91
   4  -4   5  830.53  166.57
  -4  -4  -5  809.00   82.52
   4   4   5  875.59   71.46
  -4   4  -5  775.18   68.17
  -4  -4  -5  689.46   49.82
   4   4   5  811.33   53.74
  11   2  -7   97.91   39.17
 -11   2   7   79.37   53.99
 -11  -2   7  135.63   41.04
 -11  -2   7   84.07   65.18
 -11   2   7   13.41   35.26
   2  -4  -8 5433.55  154.61
   2  -4  -8 5133.79  146.55
   2   4  -8 5531.38  258.62
  -2   4   8 5523.66  185.70
  -2  -4   8 5426.29  179.56
  -5   4   8 5407.50  209.16
  -5   4   8 5342.42  168.27
  -5  -4   8 5391.56  258.15
  -5  -4   8 5357.24  207.45
   5  -4  -8 5970.97  179.01
 -10   0  10  -17.92   34.75
 -10   0  10   -7.70   36.94
   6   4   3   19.75   26.50
   6  -4   3  -32.93   48.69
  -6   4  -3   10.35   48.19
  -6  -4  -3   28.14   21.53
  -6  -4  -3   15.12   11.41
  -1  -4  -7  574.20   75.55
  -1  -4  -7  669.93   52.21
  -1  -4  -7  608.42   38.81
   1   4   7  585.49  231.30
  -1   4  -7  657.32   55.77
   1  -4   7  617.20   63.43
   2   3   8   48.87   17.78
   2   3   8    8.25    8.74
  -2  -3  -8   45.25   12.56
   2  -3   8   65.59   59.38
  -2   3  -8   25.91   24.87
  -2  -3  -8   45.23   37.07
 -11  -1   0   46.11   37.62
 -11   1   0  -22.02   46.07
  11  -1   0   33.58   31.44
  11   1   0   77.12   31.77
  11   1   0   43.52   36.03
  -4  -5   5 9051.51  229.60
  -4   5   5 8804.74  229.89
  -4   5   5 9222.23  240.94
   4  -5  -5 9350.67  225.51
  -4  -5   5 9187.68  240.12
   4   5  -5 9306.33  231.08
   9  -3  -8   -3.62   24.25
  -9   3   8    5.63   30.44
  -9   3   8   22.18   28.45
   9   3  -8   27.22   26.91
  -9  -3   8   24.64   22.81
  -9  -3   8   28.20   23.06
  -3  -5  -3 3315.13  133.97
  -3   5  -3 3352.49  146.51
  -3  -5  -3 3265.61  109.07
  -3  -5  -3 3344.18  107.41
   3  -5   3 3486.25  134.90
   3   5   3 3345.21  133.81
  -1  -1 -10   40.19   21.25
   1   1  10   -2.19   12.92
   1   1  10    8.10   18.91
   1  -1  10   17.71   28.04
   1  -1  10   44.22   28.20
  -1   1 -10   75.72   37.57
 -11   0   9   -3.04   40.80
 -11   0   9   13.44   33.45
   9   3   113886.11  310.73
   9  -3   114042.65  353.96
  -9   3  -113577.33  356.01
   9   3   113840.81  313.52
  -9  -3  -113737.04  333.30
   8  -4  -6 6787.14  207.83
   8   4  -6 6901.60  175.42
  -8  -4   6 6631.14  186.10
  -8  -4   6 7091.05  174.69
  -8   4   6 6888.01  200.93
  -8   4   6 6476.93  124.78
   6   3   5 9436.55  225.76
  -6  -3  -5 9238.92  247.68
  -6  -3  -5 9767.34  229.21
  -6   3  -5 9158.13  300.53
   6   3   510041.05  254.40
   6  -3   5 9106.11  303.48
  -8   2  -4   25.88   34.17
   8  -2   4  124.32   92.49
  -8  -2  -4   40.95   34.01
  -8  -2  -4   19.35   11.66
   8   2   4   18.88   20.70
   8   2   4   40.61   16.57
  12   1  -6  258.55  114.46
 -12  -1   6  485.91  236.89
 -12  -1   6  401.98   41.18
 -12   1   6  462.87  145.83
 -12   1   6  414.75  143.93
 -10  -2  -1  294.96   94.90
  10   2   1  276.77   61.04
  10   2   1  262.59   50.34
 -10   2  -1  351.52  101.24
  10  -2   1  327.90   84.15
 -12   0   7   26.68   32.58
 -12   0   7   57.46   53.16
   7   0   6 1360.37  111.51
   7   0   6 1298.56   56.80
  -7   0  -6 1228.40   55.10
 -10  -1  -2  216.15   92.79
 -10  -1  -2  215.94   62.70
  10  -1   2  173.26   89.81
  10   1   2  150.09   54.87
 -10   1  -2  165.70   76.32
  -4  -5  -2   11.20   18.21
   4  -5   2   25.75   52.07
  -4   5  -2  -28.53   49.26
  -4  -5  -2  -26.07   17.97
   4   5   2    0.50   11.54
  -4  -5  -2    5.03    8.45
  -2  -2  -9  590.56   48.52
   2   2   9  451.68   86.75
   2   2   9  464.53   88.27
  -2   2  -9  612.79   65.29
   2  -2   9  585.45   76.83
   0  -3   9 9205.94  238.87
   0   3   9 9016.15  250.61
   0   3  -9 9129.47  235.48
  -5  -2  -7   46.56   25.43
  -5  -2  -7  125.35   34.30
   5  -2   7   17.88   49.79
  -5   2  -7   48.32   30.10
   5   2   7   57.02   34.66
   5   2   7   25.06   29.41
   0   5  -5  -28.86   47.26
   0  -5  -5   14.89   15.41
   0  -5  -5    6.79    8.94
   0  -5   5  -11.21   41.04
   0  -5  -5   -1.93   12.11
   0   5   5   75.61   33.60
  -8   1  11 3544.83  213.25
  -8  -1  11 3774.56  150.48
  -8   1  11 3545.94  128.16
  -8  -1  11 3499.17  127.37
   8  -1 -11 3639.43  134.78
  -1   0  11   12.42   13.16
  -1   0  11   35.73   34.45
  12   1  -3  604.78   46.44
  12   1  -3  616.35  186.83
 -12  -1   3  771.12  183.13
  12  -1  -3  696.00  165.15
 -12   1   3  630.13  183.06
   7  -3   4  -26.72   57.08
   7   3   4   14.57   17.91
  -7  -3  -4   15.85   10.88
   7   3   4    9.04    7.85
  -7  -3  -4   41.05   25.37
  -7   3  -4   -1.12   44.45
  -8   0  -5   30.22   17.28
   8   0   5   17.79   20.24
  -8   0  -5   22.45   33.15
   5   3   6    8.08   17.05
  -5   3  -6   -7.15   36.85
  -5  -3  -6   -9.39   20.39
   5   3   6  -18.65   15.75
   5  -3   6   29.13   28.43
  -5  -3  -6   13.04   18.68
   3   1   9 1958.94   86.24
  -3  -1  -9 2146.78   87.93
   3  -1   9 2076.46   59.23
   3   1   9 2239.24   50.26
  -3   1  -9 2197.60   64.14
   3  -1   9 2229.31  163.98
  -8   4   0 2209.45  200.95
   8  -4   0 2025.01  202.87
  -8  -4   0 2272.98  192.79
   8  -3  -9 3558.14  116.60
  -8   3   9 3230.26  130.58
  -8  -3   9 3415.53  146.11
   8   3  -9 3532.77  146.66
  -8   3   9 3384.30  114.40
  -8  -3   9 3397.67  279.07
  -2  -5  -4 2909.34  105.18
  -2  -5  -4 2571.58  106.85
  -2   5  -4 2686.93  266.98
   2   5   4 2572.64  129.23
   2  -5   4 2473.47  198.86
  -2  -5  -4 2827.46  107.50
   6   0   7   41.07   23.08
   6   0   7   23.61   17.90
  -6   0  -7  -20.95   23.80
   0   2  10 2122.51   79.47
   0  -2  10 2397.33  182.28
   0   2 -10 2258.03  100.31
 -12   0   2 5102.09  174.82
  12   0  -2 4973.57  159.79
  12   0  -2 5009.70  187.62
 -10  -3   1 4742.56  205.49
  10  -3  -1 5042.56  181.67
 -10   3   1 4739.42  230.69
  -3  -4  -628152.71  628.02
   3   4   627285.26  617.90
  -3   4  -626597.36  633.74
   3  -4   627264.49  646.22
  -3  -4  -628198.98  633.40
 -10  -2   9  230.55   79.52
  10   2  -9  181.72   52.86
 -10   2   9  180.74   61.45
 -10   2   9  200.89   66.40
  10  -2  -9  196.55   50.24
 -10  -2   9  233.38   83.28
  -5  -2  11 2163.85  109.46
  -5   2  11 2147.44  122.28
  -5  -2  11 2207.19   95.39
   5  -2 -11 2391.81   77.92
 -11   2   1  738.14  183.97
  11   2  -1  625.13   61.40
  11   2  -1  607.65   71.59
 -11  -2   1  598.72   71.35
  11  -2  -1  700.09  171.67
  -4   3  10    5.25    6.69
  -4   3  10  -88.68   74.50
  -4  -3  10   -6.97   37.43
  -4  -3  10   39.35   26.71
  -6   5   2   52.51   46.37
  -6  -5   2  133.33   28.25
   6  -5  -2  140.39   54.31
  -6  -5   2   86.56   39.53
  -6  -5   2  129.07   52.62
  -1  -4   8 6154.79  204.00
   1   4  -8 6181.23  200.08
  -1   4   8 6115.46  239.51
   1  -4  -8 6407.12   46.27
  -4  -2  11 1019.01   66.49
  -4  -2  11  878.66  131.59
  -4   2  11  842.87   83.99
 -10   1  10  360.45   51.70
 -10  -1  10  455.74  132.12
 -10  -1  10  371.99   56.29
 -10   1  10  408.10  133.21
  10  -1 -10  361.28  126.14
  -5   3  10 1019.50   80.96
   5  -3 -10  982.20   47.91
  -5  -3  10 1152.00  175.90
  -5  -3  10  963.66   59.13
  -7  -4  -2 4290.09  119.91
   7  -4   2 4447.56  208.80
  -7   4  -2 4182.25  159.62
  -7  -4  -2 4160.11  182.71
   7   4   2 5076.16  171.77
   7   4   2 4325.39  123.15
   6  -4  -8 2079.55   51.37
  -6  -4   8 2222.80   63.62
  -6  -4   8 2021.92  183.49
   6   4  -8 2388.45   98.06
  -6   4   8 2081.78  141.67
  -6   4   8 2168.19  141.45
  -6  -5   3 3226.99  148.00
  -6  -5   3 3255.28  100.54
   6   5  -3 3436.52  109.98
  -6   5   3 3137.87  223.32
  -6   5   3 3130.11  120.51
  -5   5  -1  173.29   84.95
  -5  -5  -1  193.28   43.52
   5  -5   1  193.43   68.99
  -5  -5  -1  168.74   40.00
  -5  -5  -1  157.00   82.41
  -5  -5  -1  158.86   34.80
 -10  -3   7  425.06   64.90
 -10  -3   7  431.51  146.67
  10   3  -7  304.66   71.80
 -10   3   7  417.48  149.65
 -10   3   7  490.93  134.75
 -11   1   9 3483.84  136.88
 -11  -1   9 3514.30  204.34
 -11  -1   9 3621.50  147.70
 -11   1   9 3394.55  146.18
  -6  -2  11  492.43  171.63
  -6   2  11  532.94  211.56
  -6  -2  11  429.18   54.60
   6  -2 -11  499.86   37.21
  -6   2  11  437.54   80.58
 -12  -1   715668.12  456.21
 -12   1   714582.32  354.56
 -12   1   716128.45  417.62
  12   1  -717098.51  398.96
 -12  -1   716193.40  378.84
  -5   5   5 5876.92  196.22
   5   5  -5 5639.41  192.23
   5  -5  -5 5792.93  177.18
  -5  -5   5 5631.87  229.83
  -5   5   5 5382.76  199.64
  -5  -5   5 5585.28  170.54
   7   1   6   22.47   31.66
   7  -1   6   19.56   36.77
  -7  -1  -6   28.64   27.64
  -7   1  -6   37.67   35.33
  -7  -1  -6   31.34   29.71
   7   1   6   42.72   26.11
   9   0 -11   15.42   29.64
  -9   0  11   41.55   26.76
  -9   0  11    7.50   15.03
  -3   3  10   66.83   47.01
  -3  -3  10   72.46   44.88
  -3  -3  10   76.63   43.77
  -9  -2  10 5007.64  215.75
   9  -2 -10 5143.21  185.94
  -9   2  10 4788.91  170.40
  -9  -2  10 5181.64  183.33
  -9   2  10 5014.87  233.73
  -9   0  -423798.47  585.64
   9   0   423868.36  625.16
  -9  -2  -3   51.39   25.06
   9   2   3   53.15   28.30
   9  -2   3   73.51   66.90
  -9   2  -3   77.50   34.82
  -6   5   117312.23  437.57
  -6  -5   118367.86  408.49
   6  -5  -118451.66  442.55
  -6  -5   118185.30  438.65
  -6  -5   117880.12  398.39
  -8   3  -3 2962.67  129.07
  -8  -3  -3 2997.56  109.09
  -8  -3  -3 3104.96   97.72
   8   3   3 3172.36  114.36
  -1  -1  1110498.93  285.85
   1   1 -1111602.97  277.65
  -1   1  1111270.64  259.79
  -1   1  1110727.18  294.62
  -1  -1  1111389.83  305.12
  -4  -3  -7 3044.09  124.86
  -4   3  -7 2631.76  147.21
   4   3   7 2902.32  117.19
   4  -3   7 2910.13  142.14
   4   3   7 2743.14   98.14
  -4  -3  -7 2604.87  100.03
  -9   4   4  745.90  110.11
  -9   4   4  733.15  121.12
  -9  -4   4  693.51   42.36
   9   4  -4  865.72   45.47
  -9  -4   4  782.06  154.21
  -9  -4   3  113.73   44.80
  -9   4   3  105.81   63.11
  -8  -1  -5 3457.67  115.68
  -8  -1  -5 2882.84  142.66
  -8   1  -5 3092.02  239.87
   8   1   5 3122.07  159.07
   8  -1   5 3135.81  136.10
  -6   3  10  268.62   68.08
  -6   3  10  342.27  151.73
   6  -3 -10  227.09   42.37
  -6  -3  10  270.76   74.88
  -6  -3  10  283.67   82.61
   4   2   8 7929.88  224.24
  -4   2  -8 7937.97  225.23
  -4  -2  -8 7414.33  185.70
  -4  -2  -8 8279.48  208.40
   4  -2   8 7921.45  239.77
  -3  -2  11   34.15   55.94
  -3  -2  11   65.50   51.25
  -3   2  11   92.83   19.72
  -3   2  11   95.98   14.27
  -3   2  11   49.82   48.47
  -6  -1  -7 6806.32  182.08
   6   1   7 7302.24  220.76
   6   1   7 6741.41  218.31
  -6   1  -7 6695.84  179.49
   6  -1   7 6475.99  117.12
   5   0   8  364.96   81.67
  -5   0  -8  375.81   82.86
   5   0   8  294.99   44.92
  -6   5   4  190.28   87.13
  -6  -5   4  269.50  104.75
  -6  -5   4  334.72   73.54
  -6   5   4  296.28   98.68
   6   5  -4  363.77   68.98
  12   1  -2  148.51   56.32
 -12  -1   2   97.86   41.54
  12   1  -2   70.48   35.48
 -12   1   2  120.06   39.04
  12  -1  -2  169.51   44.68
  11   2  -8 6280.25   88.90
 -11   2   8 5904.21  202.18
 -11  -2   8 5977.75  185.23
 -11   2   8 5931.58  200.66
 -11  -2   8 6029.21  289.75
  11   0   1   20.84   39.09
  11   0   1   37.33   28.09
 -11   0  -1  -23.21   42.10
  -1  -5  -5 4946.69  155.10
  -1  -5  -5 4814.66  167.47
   1   5   5 4979.81  159.77
  -1  -5  -5 4980.66  167.38
   1  -5   5 5321.38  184.25
  -1   5  -5 4859.58  175.05
 -12   0   844363.57  311.86
 -12   0   843828.27 1000.29
  -3   5   6   28.84   17.29
   3  -5  -6    6.53   11.99
  -3   5   6   -6.46   38.44
  -3  -5   6   37.41   22.71
  -3  -5   6  -16.69   45.88
  -2   5   6   42.57   25.87
   2  -5  -6   10.85   12.18
  -2   5   6   24.83   23.21
   2   5  -6   30.10   68.85
  -2  -5   6  -16.64   34.29
  -9  -4   5  191.38   44.76
  -9  -4   5  149.08   69.33
  -9   4   5  113.01   84.81
   9   4  -5  138.67   26.96
  -9   4   5  183.25   82.52
  -9  -4   2  163.75  106.12
  -9   4   2  321.97   80.98
   9  -4  -2  213.63   92.28
  -7  -2  11 3417.20  155.56
  -7   2  11 3264.94  106.68
   7  -2 -11 3554.60  112.46
  -7  -2  11 3308.69  125.10
  -7   2  11 3299.67  130.10
   8   4  -7   20.07   15.29
  -8   4   7   27.78   52.69
  -8  -4   7  -25.67   18.15
  -8   4   7  -20.28   27.66
  -8  -4   7   22.37   37.39
   8  -4  -7   18.98   19.34
  -2   0 -10   33.50   17.77
   2   0  10  -41.26   37.06
   2   0  10    2.01   22.51
  -5   0  12 3125.62  126.75
  -5   0  12 3245.29  179.33
  -5   0  12 3208.31  131.00
  -2   3  10   18.55   29.64
  -2  -3  10   30.20   18.86
   2   3 -10   10.02   19.21
  -4   5   6   24.88   22.90
   4   5  -6   96.96   51.26
  -4  -5   6   36.27   36.86
  -4  -5   6   10.26   25.18
  -4   5   6   62.56   40.56
  -2  -4  -7 2355.97   74.00
  -2   4  -7 2388.66  172.20
   2  -4   7 2305.33   99.50
   2   4   7 2225.25   67.62
  -2  -4  -7 2243.79   47.83
  -2  -4  -7 2276.30  120.18
  -9  -1  11 2550.81  115.20
   9  -1 -11 2558.36  128.05
  -9   1  11 2578.11  156.37
  -9  -1  11 2652.49  114.89
  -9   1  11 2674.19  122.02
   9  -1   4  119.81   66.73
  -9   1  -4  160.26   95.00
  -9  -1  -4   92.26   54.39
  -9  -1  -4  248.81   55.14
   9   1   4  127.47   55.20
  -6   0  12  265.98  106.35
  -6   0  12  331.69   70.91
  -6   0  12  388.17  111.91
   1  -5  -6   18.93   12.25
  -1   5   6   16.55   17.78
   1   5  -6  -58.28   40.69
  -1  -5   6   35.28   38.36
   1  -5  -6    2.47   11.76
  -6  -5   0  142.96   31.64
  -6   5   0   88.40   58.43
   6  -5   0  117.77   45.69
  -6  -5   0   99.69   61.64
  -6  -5   0   87.36   17.41
   0   4  -8 2314.17   98.66
   0  -4  -8 2483.91   71.95
   0  -4   8 2345.14  117.32
   0  -4  -8 2655.11   76.23
   0   4   8 2607.34  141.37
  12   0  -1   24.48    9.19
  12   0  -1   -6.64   22.74
 -12   0   1   -6.97   45.39
   1   3   912351.49  305.80
   1  -3   912414.62  309.18
  -1   3  -912425.89  329.48
  -7   4   8 2714.00  107.55
   7  -4  -8 2606.03  107.77
  -7   4   8 2594.40  115.34
   7   4  -8 2821.87  100.87
  -7  -4   8 2758.37  122.58
  -7  -4   8 2859.95  139.43
  -4  -5  -3  828.08   49.07
  -4  -5  -3  770.78   64.31
   4  -5   3  869.28  185.49
  -4   5  -3  788.93   76.99
  -4  -5  -3  733.81   70.78
   4   5   3  832.51   63.17
  -4   0  12 1739.02  159.85
  -4   0  12 1569.33   95.89
  -4   0  12 1521.86   55.10
   8  -4   1   47.32   44.91
  -8  -4  -1   13.09   23.64
  -8   4  -1   57.76   91.46
   0   0 -11   14.66   23.09
   0   0  11   17.79   31.73
   0   0  11   10.45   19.81
   5   1   8   16.75   35.00
   5   1   8   19.00   34.43
  -5   1  -8   34.70   29.05
  -5  -1  -8   54.05   27.43
   5  -1   8   39.43   36.24
  -7  -3  10   27.38   42.37
  -7  -3  10   -1.27   31.06
   7  -3 -10    9.28   15.68
  -7   3  10   23.75   37.68
  -7   3  10   27.14   19.18
 -10   3   0  336.82   82.01
  10  -3   0  345.93   85.46
 -10  -3   0  114.27   88.76
 -12   2   5  171.90   78.13
 -12   2   5   49.38   41.75
 -12  -2   5   64.82   43.85
 -12  -2   5   67.18   24.69
  12   2  -5   49.44   17.95
 -11   1  -1 2838.06  110.70
  11   1   1 3104.23  111.26
  11   1   1 2928.67  111.68
 -11  -1  -1 3054.23  243.06
  11  -1   1 2879.66  162.99
  -3  -5  -4  488.17   59.18
  -3   5  -4  521.39  197.08
  -3  -5  -4  508.44   84.46
   3  -5   4  580.39  177.76
  -3  -5  -4  353.35   97.26
   3   5   4  557.48   89.82
  -2  -2  11  375.90  137.47
  -2   2  11  423.98   96.22
 -12  -2   4 1606.73   71.58
 -12   2   4 1769.31   94.71
 -12   2   4 1637.11  175.90
 -12  -2   4 1809.32   67.21
  12   2  -4 1964.81   56.06
 -12   1   8  235.61  111.19
  12   1  -8  179.95   63.31
 -12  -1   8  320.20  166.22
 -12  -1   8  243.91  100.15
 -12   1   8  399.26  138.81
 -11   3   4   18.75   40.31
 -11  -3   4  -39.38   43.56
  11   3  -4   11.98   13.76
 -11   3   4   42.97   18.05
 -11  -3   4    0.02    9.23
  10   0   3   19.91   37.00
 -10   0  -3   45.01   32.68
 -10   0  -3   -8.91   46.71
   6   5  -5   30.66   22.44
  -6   5   5   38.77   35.72
   6  -5  -5   36.80   20.53
  -6  -5   5   43.09   26.08
  -6  -5   5   57.80   36.84
  -6   5   5   30.14   26.54
   9   3  -9 1272.59  107.40
  -9   3   9 1170.77  155.06
  -9  -3   9 1124.51   83.03
   9  -3  -9 1136.49   59.51
  -9  -3   9 1141.66  118.12
  -9   3   9 1192.27   57.55
  11   3  -5 2851.16   96.21
 -11  -3   5 2645.40   85.81
 -11   3   5 2641.93  125.27
 -11   3   5 2658.84  180.26
 -11  -3   5 2627.99  109.15
  -9   3  -2  277.80   66.43
  -9  -3  -2  220.45   51.33
   9  -3   2  243.05   71.20
  -9  -3  -2  225.86   31.77
  -5   5  -2   67.27   63.66
  -5  -5  -2   75.25   21.30
  -5  -5  -2   22.36   18.85
   5  -5   2   96.14   35.50
  11   2   024855.20  559.03
  11  -2   025397.21  593.42
 -11  -2   025686.33  625.68
 -11   2   025477.89  743.69
  11   2   025895.90  596.61
   7   0 -12 4172.18  135.52
  -7   0  12 3788.46  135.65
  -7   0  12 4120.79  150.83
  -3   3  -8  629.06   55.38
  -3  -3  -8  575.84   40.12
   3   3   8  682.70   83.21
   3  -3   8  699.34  178.40
   3   3   8  595.46   54.38
  -3  -3  -8  690.61  113.35
 -11   0  10  198.61  104.59
 -11   0  10  198.37   77.25
   2   1  10   13.18   13.91
   2  -1  10   13.52   21.92
   2  -1  10   -5.45   48.02
   2   1  10   13.59   14.40
  -2  -1 -10   25.51   17.57
  -2   1 -10   19.11   18.16
   1   2  1011220.05  284.00
   1  -2  1010785.54  297.26
  -1  -2 -1011403.03  256.43
  -1   2 -1010877.15  307.48
   1   2  1010747.74  241.74
  -9  -4   6 9567.03  223.94
   9   4  -610536.39  247.25
  -9  -4   6 9631.19  326.85
  -9   4   6 9465.53  252.31
  -9   4   6 9077.84  230.34
   9  -4  -1 2025.43  171.14
  -9  -4   1 2075.90  106.08
  -9   4   1 2101.70   93.68
 -12   2   6  720.92   97.47
 -12  -2   6  748.57   77.05
  12   2  -6  689.40   62.17
 -12   2   6  721.02  188.56
 -12  -2   6  742.60  164.05
 -10  -3   8  478.26  292.43
 -10  -3   8  404.13  114.18
  10   3  -8  399.83  103.30
 -10   3   8  397.15   95.50
 -10   3   8  362.36   73.20
  -5   5   6  -24.02   30.60
   5   5  -6   15.97   12.75
  -5  -5   6   13.44   20.25
  -5  -5   6   -7.14   51.31
  -5   5   6   26.04   30.98
   5  -5  -6   13.22    9.97
  -5   1  12   12.92   39.21
  -5  -1  12   15.99   33.13
  -5  -1  12    1.94   25.03
  -5   1  12    1.29   11.78
  -5   1  12    8.44   21.15
  -5  -1  12   35.40   17.07
 -10  -2  -2 4985.29  169.72
 -10  -2  -2 4780.66  143.93
  10   2   2 5138.53  164.94
 -10   2  -2 5074.35  199.67
  10  -2   2 5270.20  180.54
  -5  -4  -5  169.27   63.51
  -5   4  -5  147.98   38.83
   5  -4   5  145.72   66.01
  -5  -4  -5  150.68   55.61
   5   4   5  210.56   67.42
   5   4   5   38.26   27.21
   6   4   4 4587.99  146.98
  -6  -4  -4 4738.71  193.06
  -6   4  -4 4256.29  148.82
   6  -4   4 4782.14  172.97
  -6  -4  -4 4741.29  155.90
   6   4   4 4620.28  145.82
 -11  -3   3 8164.83  216.53
  11  -3  -3 8040.09  263.14
 -11   3   3 7879.82  267.99
  11   3  -3 8584.60  195.48
   4   0   9   37.40   34.40
   4   0   9   -3.05   24.20
  -4   0  -9   15.27    9.80
  -6  -1  12 5997.56  199.72
  -6   1  12 5807.45  199.15
  -6  -1  12 6214.93   93.92
  -6   1  12 5970.77  177.88
   6  -1 -12 6080.13  177.89
  -6  -1  12 6008.94  216.32
   4  -4  -9  662.28   42.44
  -4  -4   9  394.84   51.80
  -4   4   9  651.22   70.17
  -4  -4   9  708.37   68.53
  -8  -2  11   18.87   40.82
   8  -2 -11   57.24   22.08
  -8   2  11   51.30   40.61
  -8  -2  11   60.35   42.64
  -8   2  11  116.96   46.27
 -12  -2   3   89.68   73.15
  12  -2  -3  116.30   41.77
  12   2  -3   74.75   29.26
 -12   2   3   47.85   43.28
  12   2  -3  154.58   31.96
  -3   0  1222720.39  537.65
  -3   0  1221076.66  489.37
  -3   0  1223661.38  536.05
  12  -1  -1  112.23   65.06
  12   1  -1  132.54   50.32
 -12  -1   1  102.34   55.04
  12   1  -1  130.09   35.18
 -12   1   1  215.38   56.97
   0   5  -6   26.89   24.48
   0   5   6   58.51   20.17
   0  -5   6   84.03   56.66
   0  -5  -6   23.92   21.67
   0  -5  -6   36.34   12.66
   0  -5  -6   34.02   20.90
   3   2   9  -38.80   34.64
   3   2   9   13.00    9.43
  -3   2  -9   25.73   31.49
  -3  -2  -9   -0.70    8.92
   3  -2   9   25.97   39.73
  -3  -4   9  564.39  172.91
   3  -4  -9  595.84   36.69
  -3   4   9  364.78  171.51
  -3  -4   9  610.25   71.27
  -4   1  12  373.75   59.52
  -4   1  12  306.51  150.84
  -4  -1  12  345.68  105.20
  -4  -1  12  389.26  106.51
  -4  -1  12  380.02   96.49
  -4   1  12  416.10  101.55
  -2  -5  -523749.55  536.63
  -2  -5  -526282.84  592.16
   2   5   524654.51  562.90
  -2   5  -524998.18  611.72
  -2  -5  -524336.48  549.24
   2  -5   523918.06  567.99
   0  -1  11  413.96  106.25
   0   1 -11  417.99   40.86
   0   1  11  480.28  140.66
   0  -1 -11  302.57   45.62
   0   1  11  421.36   39.06
   0  -1  11  422.40  205.08
  -7   5   3 6796.96  221.29
  -7  -5   3 7210.42  172.39
  -7  -5   3 6980.46  198.35
  -7  -5   3 7134.22  166.79
 -11  -3   6   51.75   32.84
  11   3  -6   19.81   14.77
 -11   3   6   76.15   59.59
 -11  -3   6   35.42   28.61
 -11   3   6   84.17   74.64
  -5   4   9  829.78   80.00
  -5   4   9  650.52  213.43
   5  -4  -9  817.51   51.23
  -5  -4   9  713.83   71.35
  -5  -4   9  774.20  108.04
  -1   3  10   38.54   23.49
  -1  -3  10   48.85   26.57
   1   3 -10   76.06   36.99
 -10   0  11   13.13   29.39
 -10   0  11    9.09   26.70
  -7  -5   2  136.35   67.50
  -7   5   2   79.92   33.82
   7  -5  -2  125.61   62.08
  -7  -5   2   72.99   13.78
  -4   4  -6 5010.75  183.26
   4  -4   6 4790.08  169.34
   4   4   6 5066.43  158.47
  -4  -4  -6 5664.75  172.03
   4   4   6 5726.86  174.43
  -4  -4  -6 5068.71  152.78
 -10  -1  -316946.76  389.56
 -10  -1  -317909.83  427.18
 -10   1  -316627.08  433.33
  10  -1   316839.62  402.35
  10   1   316400.46  434.89
   7  -4   3   17.17   24.82
   7   4   3   14.67   16.26
  -7  -4  -3   16.81   10.11
  -7   4  -3   35.27   31.60
  -7  -4  -3   21.24   19.10
 -13   0   5  -19.37   65.73
 -13   0   5   -3.14   36.03
 -10  -2  10 5177.99  175.69
 -10  -2  10 5137.46  165.79
 -10   2  10 4999.23  279.32
 -10   2  10 4960.97  214.05
  10  -2 -10 5281.01  171.08
 -12   0   9   -8.65  109.59
 -12   0   9  -18.37   62.28
  -7   1  12   17.70   18.61
  -7   1  12   13.30   26.54
   7  -1 -12    5.68    7.21
  -7  -1  12    2.11   13.81
  -7  -1  12   42.04   49.62
  -6   5  -1 1262.85  111.37
  -6  -5  -1 1286.08   38.26
  -6  -5  -1 1208.85   42.76
   6  -5   1 1238.96  114.49
  -6  -5  -1 1098.53   69.21
 -11   1  10  324.62   89.94
 -11  -1  10  462.61  116.72
 -11  -1  10  448.74  148.14
 -11   1  10  380.64  155.67
  -7  -5   4  120.96   55.42
  -7   5   4   90.92   88.78
  -7   5   4   81.87   64.07
  -7  -5   4  121.64   54.88
   7   5  -4  183.58   38.66
 -11   2   9   25.36   20.75
 -11   2   9   19.80   30.85
 -11  -2   9   16.30   48.01
  11   2  -9   31.07   29.27
 -11  -2   9    7.81   34.96
   8   0 -1221127.86  485.35
  -8   0  1219315.96  456.91
  -8   0  1219466.29  501.95
 -13   0   6  452.29  154.82
 -13   0   6  443.22   97.35
 -12   2   7  927.68   71.37
  12   2  -7  788.93   68.20
 -12   2   7  906.87  158.65
 -12  -2   7  925.29  183.88
 -12  -2   7  877.53   78.33
   7  -2   6 2697.70  133.05
   7   2   6 3234.47  110.34
  -7  -2  -6 3201.71  112.92
   7   2   6 2891.34  102.59
  -7  -2  -6 3388.57  140.20
  -7   2  -6 3159.11  141.18
  -8  -3  10  939.91  128.59
  -8  -3  10 1041.46   81.46
  -8   3  10  937.15   85.39
  -8   3  10 1022.42   87.96
   8  -3 -10  989.11   43.54
 -13   0   4 3872.53  161.87
  13   0  -4 4091.34  139.24
 -13   0   4 3958.61  161.54
   4  -1   9 4099.59  202.66
   4   1   9 4001.43  214.82
   4   1   9 4637.68  148.27
  -4  -1  -9 4080.48  143.65
  -4   1  -9 3889.85  138.69
   0  -6   029524.80  676.60
   0   6   028297.63  656.06
  11  -3  -2   13.51   25.74
 -11   3   2   16.10   42.66
  11   3  -2    7.48    6.89
  11   3  -2   -2.13    4.55
 -11  -3   2   58.58   38.39
  -2   4   9  575.77  112.65
  -2  -4   9  628.40   63.97
   2   4  -9  672.80  168.47
  -1  -2  11 1180.10   72.46
   1   2 -11 1368.56   66.15
  -1   2  11 1156.50   79.94
   1   4   8  692.90  132.38
  -1   4  -8  678.55   50.37
  -1  -4  -8  634.12   66.06
  -1  -4  -8  631.83   25.86
   1  -4   8  709.37  117.16
  -1  -4  -8  688.46   24.53
  -3   1  12  116.92   72.33
  -3   1  12  107.20   31.67
  -3  -1  12   94.05   44.49
  -3  -1  12   90.77   49.90
  -3  -1  12   39.21   56.54
  -3   1  12   41.40   23.62
   7  -5  -134632.99  806.79
  -7  -5   132369.40  748.80
  -7   5   132233.43  742.37
   8   2   5 1026.04  101.76
   8  -2   5 1091.36  181.84
  -8  -2  -5 1062.53   51.24
   8   2   5  975.39  163.88
  -8  -2  -5 1112.46   65.37
  -8   2  -5 1001.29   79.72
  -6   4   9  911.70  129.32
   6  -4  -9 1006.28   61.00
  -6   4   9  979.81   69.95
  -6  -4   9 1126.44  142.91
  -6  -4   9 1069.95  109.45
  -1  -6   019879.44  471.29
  -1  -6   020757.20  477.64
  -1   6   019721.75  501.51
   1  -6   019067.91  588.16
  -8  -4   8 2097.69  155.97
  -8  -4   8 2061.40  115.53
  -8   4   8 1944.61   93.46
   8  -4  -8 2191.17   58.70
   8   4  -8 2064.66   64.45
  -8   4   8 2270.41  125.33
  -7  -3  -5 3308.20  188.97
   7   3   5 3507.05  120.41
  -7   3  -5 3047.78  117.85
   7  -3   5 2821.30  160.11
  -7  -3  -5 3406.09  106.03
   7   3   5 3172.70  105.63
   0   6  -1   58.18   38.86
   0  -6  -1  112.21   51.99
   0  -6   1  179.13   68.04
   0  -6  -1  172.94   51.25
   0   6   1   54.33   46.52
  -6   3  -6   46.39   50.17
  -6  -3  -6   86.67   30.05
   6  -3   6    6.02   55.19
  -6  -3  -6   -1.91   16.94
   6   3   6  148.17   35.49
   6   3   6   47.98   25.25
   1   6  -1  354.07  107.20
   1  -6  -1  390.54   93.93
  -1  -6   1  348.40   91.27
  -1  -6   1  450.79   42.19
  -1   6   1  321.48  103.84
  -6  -2  -7    9.73   13.78
  -6  -2  -7    3.44   19.41
   6   2   7   21.70   31.77
   6  -2   7   24.13   24.09
  -6   2  -7   -3.07   38.34
   6   2   7  -22.00   25.41
  -6  -5   6   69.09   35.98
   6   5  -6  120.24   27.55
  -6  -5   6   66.73   38.13
  -6   5   6   42.36   40.08
  -6   5   6   22.53   24.75
   6  -5  -6   37.09   28.00
  12   2  -2  327.64   80.69
  12   2  -2  252.61   75.97
 -12   2   2  267.60  124.85
 -12  -2   2  381.55  123.75
  12  -2  -2  497.20  128.23
  10  -1 -11   77.38   50.33
 -10   1  11   85.88   45.32
 -10  -1  11   74.27   33.89
 -10   1  11   49.24   62.68
 -10  -1  11  109.33   40.27
  -3  -5   7 9946.30  330.74
  -3   5   7 9836.41  253.69
  -3   5   7 9916.52  244.04
  -3  -5   7 9824.47  249.13
   3  -5  -710398.20  241.82
  -9  -4   7  101.20   49.88
  -9  -4   7   50.65   32.59
   9   4  -7   58.14   26.06
  -9   4   7  102.56   38.19
  -9   4   7   45.89   37.68
  -2   0  1232832.88  760.20
  -2   0  1227934.75  637.45
  -2   0  1233212.88  760.84
  -9   4   0 6842.94  203.07
  -9  -4   0 6552.19  202.71
   9  -4   0 6699.42  203.44
  12   0   0   18.53   24.67
 -12   0   0   55.06   55.08
  12   0   0  -21.55   29.18
 -11   3   7 6746.38  232.67
  11   3  -7 5665.51  195.99
 -11  -3   7 6627.09  236.08
 -11   3   7 6467.86  136.98
 -11  -3   7 6550.59   80.74
 -13   1   5  729.40  236.31
 -13  -1   5  693.75   58.27
 -13   1   5  642.03   65.37
 -13  -1   5  757.94  122.35
  13   1  -5  666.23  111.34
 -12  -1   910100.19  251.75
 -12   1   9 9670.37  278.71
 -12   1   9 9401.54  283.85
 -12  -1   9 9349.07  273.54
 -13   0   7    8.23   25.53
 -13   0   7   22.12   49.43
 -11   0  -2 1662.98  105.89
  11   0   2 1691.64   82.37
 -11   0  -2 1776.29   72.50
  -1  -6  -1  219.08   60.12
  -1   6  -1  192.22   58.11
  -1  -6  -1  199.13  107.59
   1  -6   1  247.66   63.95
  -1  -6  -1  185.60   58.20
  -4  -5   730697.76  710.31
  -4  -5   730814.40  699.45
  -4   5   731146.44  700.24
   4  -5  -732005.48  718.34
  -4   5   730641.87  706.42
   1   5   6   26.17   28.49
  -1   5  -6  -45.45   47.96
  -1  -5  -6   15.44   15.73
  -1  -5  -6   -2.38   14.95
   1  -5   6   67.88   47.73
  -1  -5  -6    5.36   12.12
  -7  -5   5 8175.56  195.74
  -7  -5   5 8461.43  275.79
   7   5  -5 8046.44  192.31
  -7   5   5 7909.92  223.33
  -7   5   5 7823.42  227.84
  -2  -5   7  929.57   63.83
  -2   5   7  989.93   65.47
   2   5  -7 1107.78  129.66
   2  -5  -7 1202.22   57.64
  -2   5   7 1026.70   58.83
   3   4   7   39.87   31.97
  -3  -4  -7   17.77   15.84
  -3   4  -7  -27.67   40.07
  -3  -4  -7    9.76   11.44
 -13   0   3   43.87   52.55
  13   0  -3   -4.81   17.18
  13   0  -3   27.48   23.60
  -2   6   1   56.09   43.25
  -2  -6   1   45.18   22.35
  -2  -6   1   33.45   29.03
  -2  -6   1   35.57   14.77
   2  -6  -1   75.17   42.82
   8   3   4  119.94   27.68
   8  -3   4   98.44   41.54
  -8  -3  -4  159.04   33.96
   8   3   4   78.48   43.71
  -8  -3  -4   95.25   56.17
  -8   3  -4  136.34   50.71
  -8   1  12   -0.78   29.20
  -8  -1  12   17.48   23.14
  -8  -1  12   -9.37   32.50
  -8   1  12   23.94   27.45
   8  -1 -12   12.64   18.97
 -10  -3  -134669.75  720.18
  10   3   134862.10  695.82
 -10   3  -132030.95  673.96
  10  -3   135375.08  831.56
 -13  -1   6   30.85   21.74
 -13   1   6    7.71   21.59
 -13   1   6   -3.51   57.86
  13   1  -6    7.52   14.35
 -13  -1   6   41.39   29.95
   8   4   2 5039.47  139.11
  -8  -4  -2 4921.24  192.53
  -8   4  -2 5105.22  197.30
   8  -4   2 5235.16  240.56
   1   6  -2 8020.40  203.33
   1  -6  -2 7836.48  187.76
  -1  -6   2 8034.76  189.54
  -1   6   2 7718.30  205.53
 -13   1   4   15.82   41.49
 -13   1   4   16.95   28.14
  13   1  -4   -0.38   21.43
 -13  -1   4   37.07   26.49
 -13  -1   4    7.56   33.07
  -2   3  -914954.64  350.01
   2  -3   914377.62  368.61
   2   3   914466.53  318.20
   2   3   914685.25  294.60
  -2  -3  -915045.98  301.69
   5   3   714154.08  298.67
   5   3   713836.52  305.21
   5  -3   713333.83  335.64
  -5  -3  -714100.60  300.95
  -5  -3  -713107.93  277.64
  -5   3  -712692.46  299.69
  -1   0 -11    1.25   18.75
   1   0  11  -16.21   23.00
   1   0  11    4.08   30.18
  -2   6   0 4338.71  165.30
  -2  -6   0 4554.96  150.54
  -2  -6   0 4442.78  217.17
   2  -6   0 4210.30  241.97
  -2  -6   0 4645.12  143.53
  -9   2  11  141.30  119.26
  -9  -2  11  210.59   74.01
   9  -2 -11  187.12   59.11
  -9  -2  11  342.51  100.07
  -9   2  11  268.48   83.01
  -9   2  -4 7179.91  201.97
   9  -2   4 7001.58  183.75
  -8   0  -6 5019.71  171.26
   8   0   6 5180.41  196.37
 -10   4   4  951.79  160.65
 -10  -4   4 1110.36   68.70
 -10  -4   4  955.73   25.74
 -10   4   4  983.86   64.43
  10   4  -4 1044.20   30.94
   0  -6  -2 5765.06   84.88
   0   6  -2 5824.64  108.12
   0  -6   2 5731.87  110.63
   0  -6  -2 5405.33  199.43
   0   6   2 5605.93  193.06
  -4  -5  -4  262.72   92.55
   4   5   4  381.56   94.40
  -4  -5  -4  285.77   48.84
   4  -5   4  313.15   93.59
  -4   5  -4  324.68  113.51
  -4  -5  -4  222.09   69.78
  -7   0  -7   27.56   25.93
   7   0   7   -2.98   34.63
  -5  -5  -3   -5.55   18.00
   5  -5   3  -23.05   46.42
  -5   5  -3  -16.47   56.35
   5   5   3    6.38   14.78
   5   5   3   -6.21   14.84
  -5  -5  -3   11.66    6.89
  -1  -4   9  830.21   64.06
  -1   4   9  839.92  105.14
   1   4  -9  856.63  232.20
  -2  -6   2 4549.49  144.25
   2  -6  -2 4533.26  197.78
  -2  -6   2 4978.88  165.99
  -2   6   2 4401.61  205.01
  -2  -6   2 4826.71  168.82
   3   0  10 4634.12  181.54
  -3   0 -10 4698.58  159.96
   3   0  10 4783.47  158.43
 -10   4   3   74.50   48.24
  10  -4  -3  100.36   58.54
 -10  -4   3   83.38   85.02
  -5  -2  -8 2941.44  111.07
   5   2   8 2975.44  120.22
   5   2   8 2886.74  116.96
   5  -2   8 2972.80  193.20
  -5   2  -8 2884.31  119.87
   0  -3  10   19.91   30.33
   0   3  10   59.22   41.22
   0   3 -10   91.82   49.26
 -10  -4   5   26.93   10.19
 -10  -4   5   -8.89   38.65
 -10   4   5   46.68   26.63
  10   4  -5    9.75   14.79
 -10   4   5   11.26   24.62
   7  -5   0   38.48   22.76
  -7  -5   0   17.65   19.25
  -7   5   0   37.58   39.72
  11   2   1  790.74   53.43
 -11  -2  -1  977.58  125.12
  11  -2   1  976.48  100.11
  11   2   1  936.64   93.85
 -11   2  -1  890.95   75.58
 -10  -3   9  479.51  101.71
 -10  -3   9  467.92  216.06
  10   3  -9  488.46  117.58
 -10   3   9  569.02  132.94
  10  -3  -9  537.96   57.20
 -10   3   9  525.12   95.51
  -7   4   9 1006.46   54.85
  -7  -4   9 1003.71  101.56
  -7   4   9  979.27  199.53
  -7  -4   9 1078.24   89.70
   7  -4  -9  788.78   56.76
 -12   2   8 6532.03  187.86
 -12  -2   8 6268.43   93.66
  12   2  -8 6693.40  164.98
 -12   2   8 6059.02  120.25
 -12  -2   8 6241.30  121.03
  -5  -5   738001.22  777.21
   5  -5  -738553.93  784.53
  -5   5   736645.37  778.76
  -5  -5   737699.76  788.52
  -5   5   737586.37  770.17
  -5  -3  1137469.56  773.12
  -5  -3  1139355.52  813.30
  -5   3  1137046.02  775.22
   5  -3 -1140056.42  796.97
  -9   0  1221579.68  470.46
  -9   0  1223195.06  522.57
  -2  -1  12  537.13   53.09
  -2   1  12  462.97   39.32
  -2   1  12  397.80   76.82
  -2  -1  12  605.81  165.84
  -2   1  12  389.34  206.96
  -2  -1  12  480.46   52.39
  12   1   0  818.40   57.06
  12   1   0  643.90  126.95
  12  -1   0  956.86  151.25
 -12  -1   0  660.48   66.45
 -12   1   0  823.17   84.80
  11  -3  -115971.75  357.72
  11   3  -117466.53  349.97
 -11   3   116041.73  368.58
  11   3  -115560.73  312.02
 -11  -3   116134.38  357.42
  -1   5   7   23.38   21.32
   1  -5  -7   38.54    9.72
   1   5  -7   19.39   24.00
  -1  -5   7   46.63   43.00
   1  -5  -7   24.51   17.26
   9   0   5    9.27   19.87
  -9   0  -5   15.92   27.68
  -4  -3  1110785.79  314.81
  -4   3  1111022.27  262.11
  -4  -3  1110690.00  367.81
  -3   5  -535291.35  762.85
   3  -5   534338.81  734.81
   3   5   536033.27  734.29
  -3  -5  -532828.41  665.35
  -3  -5  -535961.15  726.04
  13   1  -7 2370.37  114.75
 -13   1   7 2285.04  107.41
 -13  -1   7 2343.47  121.26
 -13   1   7 2365.42  157.46
 -13  -1   7 2344.84  104.15
  11  -1   2 2062.45  120.10
 -11  -1  -2 2430.39   92.05
 -11  -1  -2 2280.06  182.60
  11   1   2 2182.24  135.57
 -11   1  -2 2249.16  104.09
  -2  -6  -1  118.54   30.19
  -2   6  -1   51.14   37.51
  -2  -6  -1   60.35   31.04
   2  -6   1  102.12   44.27
  -2  -6  -1   81.09   38.46
   2   2  10 8158.77  172.58
  -2   2 -10 8423.55  204.27
  -2  -2 -10 8385.07  176.13
   2   2  10 8083.29  201.72
   2  -2  10 7675.66  231.85
  -1   6  -2 2394.37  132.17
  -1  -6  -2 2416.80   88.39
  -1  -6  -2 2344.40   95.23
   1  -6   2 2253.87  123.30
  -1  -6  -2 2347.97  116.45
 -13  -1   3 9386.73  254.79
  13   1  -3 8911.89  239.77
 -13   1   3 8899.07  227.12
  13   1  -3 9086.52  219.50
  13  -1  -3 9018.13  215.51
  -6   3  1132000.42  675.13
   6  -3 -1132450.55  650.74
  -6  -3  1133717.80  705.10
  -6  -3  1134082.68  708.38
   6   0   8  701.49  168.06
   6   0   8  633.06   98.88
  -6   0  -8  616.85   82.50
  -3  -6   1   39.63   24.63
   3  -6  -1   13.01   40.07
  -3  -6   1   19.30   19.63
  -3   6   1   39.88   22.67
  -3  -6   1   25.75   33.77
  -6   5  -2   82.29   30.58
  -6  -5  -2   10.71   25.81
  -6  -5  -2   54.10   19.87
  -6  -5  -2   50.37   11.89
   6  -5   2   44.63   54.11
  -5   2  1210971.57  228.98
  -5   2  1210502.33  264.22
  -5  -2  1210825.85  262.01
  -5  -2  1210440.85  271.84
  -1  -1 -11 1685.62   62.77
  -1   1 -11 1659.23   79.06
   1   1  11 1894.99   69.73
   1   1  11 1775.36  137.86
   1  -1  11 1380.16   93.88
   1  -1  11 1742.18   75.30
   9  -3 -10    4.75   16.69
  -9  -3  10   -2.07   52.40
  -9   3  10  -35.16   50.49
  -9   3  10   53.39   37.79
  -9  -3  10   35.87   28.22
   8   1   6  158.62   29.28
  -8  -1  -6  222.28   60.21
   8  -1   6  133.01   50.75
  -8   1  -6  237.04   78.68
  -8  -1  -6  232.97   68.12
   6  -2 -1217411.19  359.43
  -6   2  1218550.94  393.74
  -6  -2  1217705.53  391.72
  -6  -2  1216763.24  364.25
  -6   2  1217043.72  388.00
  -9  -3  -3  314.05   93.74
   9   3   3  201.60   43.24
  -9   3  -3  234.62   76.67
  -9  -3  -3  238.25   50.66
   9  -3   3  184.47   67.75
   3  -6  -2  963.81  102.09
  -3  -6   2 1009.02   75.30
  -3   6   2 1035.87   74.21
  -3  -6   2 1091.66   46.01
  -3  -6   2 1133.88  170.21
 -13   0   826144.02  558.27
 -13   0   826788.80  560.69
  10  -4  -2 1430.28  221.71
 -10   4   2 1294.83  169.86
 -10  -4   2 1116.23   65.16
  -1  -6   3  192.64   81.90
   1   6  -3  116.13   80.10
  -1   6   3  154.71   44.79
  -1   6   3  137.93   34.00
   7   1   7 3738.35  185.21
  -7  -1  -7 3309.67  127.20
  -7   1  -7 3398.35  124.92
   7  -1   7 3442.50  177.92
   7   1   7 3224.73  116.19
  12  -2  -1  294.95   81.14
  12   2  -1  221.86   68.12
 -12  -2   1  412.00  115.57
 -12   2   1  402.58  105.35
  12   2  -1  382.87   79.81
  -2   6   3   49.44   34.52
  -2   6   3  105.29   68.93
  -2  -6   3  150.39   31.27
  -2  -6   3   75.13   25.92
  -3  -1 -10   12.38   15.80
   3  -1  10   38.31   33.88
  -3   1 -10   18.96   13.04
   3   1  10   -0.12   18.24
   3  -1  10  -21.85   42.53
   3   1  10   54.89   35.90
  -3  -6   0  108.89   80.03
  -3   6   0  234.82  105.23
   3  -6   0   38.48   40.74
  -3  -6   0  267.26   70.74
  -3  -6   0  204.27   56.78
  -4  -3  -8  207.81   62.49
  -4   3  -8  127.15   68.43
   4  -3   8  274.49   72.67
   4   3   8  193.60   40.23
  -4  -3  -8  109.14   73.06
   4   3   8  189.02   59.46
  -4   2  12 1286.44   33.95
  -4   2  12 1259.69   33.68
  -4   2  12 1096.43   71.56
  -4  -2  12 1233.14  106.78
  -4  -2  12 1175.85   61.70
 -13   0   223471.53  505.65
  13   0  -222923.79  479.06
 -11   0  11    1.02   28.41
 -11   0  11    0.27   18.70
  -3  -3  11  190.00   66.58
  -3  -3  11  105.78   56.00
  -3   3  11  153.00   52.12
   0   2  11  732.64  144.71
   0   2 -11  748.08   61.65
   0   2  11  684.18   26.89
   0  -2  11  765.32  175.52
 -10   4   6   41.69   34.85
  10   4  -6   45.65   25.38
 -10  -4   6  100.92   53.71
 -10  -4   6   32.15   13.98
 -10   4   6   39.16   48.85
  -7   5   6  104.35   61.67
  -7  -5   6    8.60   19.97
  -7   5   6   90.91   50.19
   7   5  -6   35.30   22.41
  -7  -5   6   67.47   26.16
 -12   0  10 3407.55  153.02
 -12   0  10 3459.40  213.84
  11   3  -8    4.67   12.65
 -11   3   8   41.72   49.45
 -11  -3   8   -3.69   66.18
 -11  -3   8   25.29   12.60
 -11   3   8   54.39   40.60
  -1   0  1217044.07  384.53
  -1   0  1218773.82  391.48
  -1   0  1217171.84  368.26
  -8  -5   3 7886.56  199.04
  -8  -5   3 8603.83  176.80
  -8   5   3 7923.80  209.25
  -8  -5   3 8344.58  185.17
   8  -5  -3 8232.71  213.14
   0  -6  -3   14.71   13.11
   0   6  -3   57.65   37.75
   0  -6  -3    3.24   16.17
   0  -6  -3   15.40   25.12
   0   6   3   27.57   26.85
   0  -6   3   45.54   43.69
  -9   1  12  121.75   49.42
  -9   1  12   73.52   43.22
  -9  -1  12   98.78   70.97
  -9  -1  12   72.83   48.92
   9  -1 -12   70.83   43.31
 -10  -2  -3   63.50   33.80
  10  -2   3   93.37   35.52
 -10  -2  -3   67.47   51.89
  10   2   3   52.32   23.33
 -10   2  -3   35.61   16.59
   9  -1   510675.96  293.52
  -9  -1  -510727.18  243.99
   9   1   511238.72  260.28
  -9   1  -511083.72  286.39
   2   4   8 1664.41  116.68
   2  -4   8 1543.94  188.63
  -2  -4  -8 1604.36   61.59
  -2   4  -8 1771.32   98.26
  -2  -4  -8 1548.65   84.10
  -2  -4  -8 1730.56   53.80
  -8   5   4  -24.03   39.15
  -8   5   4   84.22   33.52
   8   5  -4   47.94   21.92
  -8  -5   4   70.22   57.68
  -8  -5   4   16.68   16.07
  -7  -2  12  710.34  192.30
   7  -2 -12  352.68   55.92
  -7   2  12  482.36  192.50
  -7  -2  12  418.73  148.59
  -7   2  12  445.04  103.06
  -7   3  11 4290.03  130.78
  -7  -3  11 4621.84  176.33
  -7   3  11 4091.99  157.60
   7  -3 -11 4786.40  143.43
  -7  -3  11 4469.54  246.67
  -6   5   716252.05  347.54
   6   5  -717907.74  379.47
  -6  -5   717497.08  372.76
   6  -5  -717400.35  365.97
  -6  -5   716985.97  378.34
  -6   5   717471.85  390.63
 -10   0  -442841.94  263.88
  10   0   442218.49  914.04
 -11   2  10 3583.49  138.96
 -11  -2  10 3541.09  185.22
 -11   2  10 3396.17  204.00
 -11  -2  10 3600.06  136.92
   9  -4  -8  290.98  103.28
  -9   4   8  368.58  150.28
  -9  -4   8  364.39  121.03
  -9   4   8  324.10   72.74
  -9  -4   8  389.37  103.45
   9   4  -8  336.47   77.87
  -9  -4  -1  515.00   86.36
  -9   4  -1  706.84  131.31
   9  -4   1  884.82  272.96
  -3  -6   3   25.53   18.16
  -3  -6   3   52.42   33.03
  -3   6   3   79.58   67.27
  -3   6   3   26.03   16.91
   8  -5  -2  312.92   91.78
  -8  -5   2  254.46  115.84
  -8   5   2  377.99   86.93
  -6  -4  -5  474.90   57.07
   6   4   5  523.30   68.21
   6   4   5  530.69   87.06
  -6  -4  -5  501.58   69.09
   6  -4   5  514.96  160.14
  -6   4  -5  537.81  195.86
  -2  -5  -6    3.16    8.58
  -2  -5  -6  -10.55   16.30
  -2  -5  -6    6.39    7.83
   2   5   6   14.17   26.25
  -2   5  -6   23.46   37.25
   2  -5   6   35.23   46.44
   0  -5   7  259.13  119.50
   0  -5  -7  105.61   25.72
   0  -5  -7  149.12   27.18
   0   5  -7  128.29   99.22
   0   5   7  115.65   42.67
   6   1   8   23.22   18.01
   6  -1   8   65.44   54.72
  -6  -1  -8    7.47   24.73
   6   1   8   21.66   26.38
  -6   1  -8   38.26   28.76
   0   4   9 1057.64   65.75
   0  -4   9 1087.57  162.45
   0   4  -9 1215.41   72.33
  -4  -2  -9 2713.63   92.29
   4   2   9 2400.67   83.10
   4   2   9 2569.98  102.45
   4  -2   9 2719.61  145.17
  -4   2  -9 2734.26  120.08
  -2  -6  -2   17.14   21.84
  -2  -6  -2   52.24   37.42
   2  -6   2   53.31   60.87
  -2  -6  -2   26.31   16.94
  -2   6  -2   83.75   83.91
 -13  -1   8  408.11  131.18
 -13   1   8  489.05  188.72
 -13  -1   8  448.70  128.98
 -13   1   8  293.86  132.05
   7  -4   4  849.20   84.56
  -7   4  -4  865.10  165.16
  -7  -4  -4 1086.03  135.11
   7   4   4 1071.36   90.41
  -7  -4  -4 1069.34   46.12
  -3  -2  12 4059.98  140.83
  -3   2  12 4244.43  121.03
  -3   2  12 4024.06  125.07
  -3  -2  12 4534.48  166.08
  -3   2  12 4430.57  175.31
  -5   4  -6 4244.40  166.50
   5   4   6 4342.14  168.20
  -5  -4  -6 3601.08  120.47
   5  -4   6 4332.25  192.51
  -5  -4  -6 4076.59  142.39
   5   4   6 4333.06  134.59
   3  -6   1  165.47   65.35
  -3   6  -1  142.24   64.85
  -3  -6  -1  171.13   46.74
  -3  -6  -1  136.89   37.72
  -3  -6  -1   96.63   49.87
   5   0   9   15.21   19.72
   5   0   9   39.84   26.52
  -5   0  -9   21.66   31.99
   7  -5   1 1831.64  214.74
  -7   5  -1 1810.93  211.43
  -7  -5  -1 1860.94   95.47
  13   1  -2  192.61   49.26
  13  -1  -2  123.85   43.44
 -13  -1   2  173.71   54.69
  13   1  -2  162.42   37.80
 -13   1   2  145.65   66.94
 -11   1  11 4476.46  162.63
 -11  -1  11 4685.78  164.10
 -11  -1  11 4396.26  204.36
 -11   1  11 4482.74  171.69
  -8  -4   9  218.52  109.61
  -8  -4   9  204.39  105.85
   8  -4  -9  141.43   42.30
  -8   4   9  349.71   89.55
  -8   4   9  277.97  100.62
   8   4  -9  284.28   69.63
 -12  -3   5 4522.49  172.27
 -12   3   5 4315.99  273.24
  12   3  -5 4579.31  141.36
 -12  -3   5 4441.60  131.66
 -12   3   5 4139.57  191.71
 -10   2  11 1510.66  112.99
 -10  -2  11 1701.38   86.62
 -10   2  11 1586.59   84.00
 -10  -2  11 1699.55  164.90
  10  -2 -11 1530.66  123.91
 -12   1  10   35.39   31.79
 -12  -1  10   45.68   38.85
 -12   1  10   93.11   77.76
 -12  -1  10   57.18   46.29
  -4  -6   2   28.62   25.79
  -4  -6   2   17.82   12.07
   4  -6  -2   45.69   27.47
  -4   6   2   40.16   42.23
  -4  -6   2   17.85   15.23
  -1  -1  12 1204.28   74.34
  -1   1  12 1229.52   92.73
  -1   1  12 1191.22   67.30
  -1  -1  12 1133.06   88.55
  -1   1  12 1329.09   68.14
   1   1 -12 1293.74   58.58
   4  -6  -1  433.56  112.98
  -4  -6   1  434.86  130.62
  -4  -6   1  364.42   54.28
  -4  -6   1  397.19   59.80
  -4   6   1  346.35   88.95
  -1  -6  -3   53.77   28.52
   1  -6   3  132.20   49.03
  -1   6  -3   75.44   59.74
   1   6   3   64.33   38.65
  -1  -6  -3   97.29   50.42
  -1  -6  -3   87.46   25.80
 -10  -4   1  526.72  263.09
 -10   4   1  646.12   86.04
  10  -4  -1  659.42  186.59
   2   3 -11 3966.98  205.61
  -2  -3  11 4368.49  157.63
  -2   3  11 4121.19  214.60
 -12   3   4  144.50   81.07
 -12  -3   4  130.78   22.03
 -12  -3   4   75.44   82.05
 -12   3   4  118.45   47.77
  -8   5   5 4902.57  191.41
   8   5  -5 4734.85  144.52
  -8  -5   5 4918.22  225.71
  -8  -5   5 5496.43  162.86
  -8   5   5 5166.71  303.98
  12   0   1   -0.33   26.19
  12   0   1   -7.41   29.06
 -12   0  -1  -47.31   43.79
  -4   4  10 7050.02  146.98
  -4  -4  10 7311.90  305.05
   4  -4 -10 7144.61  147.39
  -4  -4  10 6960.27  336.11
  -4   4  10 6778.88  175.63
 -13   2   5  588.19  184.55
 -13   2   5  669.39  227.91
  13   2  -5  518.09   78.24
 -13  -2   5  630.74  243.41
 -13  -2   5  571.62   77.44
  -5  -4  10 9080.17  218.63
  -5   4  10 8864.32  231.75
  -5  -4  10 9530.06  385.11
   5  -4 -10 9553.58  199.30
 -12   2   9   52.41   40.44
 -12   2   9   -5.81   42.11
 -12  -2   9   15.28   26.04
  12   2  -9    1.12   18.44
 -12  -2   9   48.54   48.81
 -10   0  1210428.02  250.77
 -10   0  1210274.53  275.59
  11   3   0  785.42   26.31
  11  -3   0  864.75  200.41
 -11   3   0  828.04  245.37
  11   3   0  745.75   52.16
 -11  -3   0  864.08  119.19
  -8  -5   122478.17  511.54
   8  -5  -123120.03  537.94
  -8   5   122765.62  492.11
 -10  -1  -4  190.49   78.30
 -10  -1  -4  192.55   53.22
 -10   1  -4  186.64   88.67
  10   1   4  192.39   53.70
  10  -1   4  153.48   54.30
   2  -6  -4   20.79   14.63
  -2   6   4   -8.74   38.08
  -2  -6   4   29.05   23.82
  -2   6   4   13.38   16.51
 -10   4   7   28.08   28.50
  10   4  -7   28.96   19.31
 -10   4   7    0.90   19.97
 -10  -4   7    7.22   33.46
 -10  -4   7   11.35    7.72
  -1   3 -10  344.71  118.02
   1  -3  10  465.70  135.72
   1   3  10  422.68  133.10
  -6   0  13   44.29   35.68
  -6   0  13   24.43   24.86
  -6   0  13  -23.66   26.23
 -12   3   6   40.01   25.22
 -12   3   6   35.09   40.81
 -12  -3   6   25.76   19.21
 -12  -3   6   50.96   36.33
  12   3  -6   20.71   13.67
  -8  -2  12 1773.57  171.92
  -8  -2  12 1591.33  142.29
  -8   2  12 1707.79  101.49
   8  -2 -12 1819.81   64.87
  -8   2  12 1753.23   83.73
  13   2  -6 7477.30  173.59
 -13   2   6 7644.11  202.60
 -13  -2   6 7103.60  163.77
 -13   2   6 6908.19  192.49
 -13  -2   6 7050.72  224.02
  -1   6   4  618.09  164.02
  -1  -6   4  474.00   51.42
   1  -6  -4  530.68   77.50
  -1   6   4  563.97  111.51
   1   6  -4  577.09  173.55
  -5   0  13    2.23   19.01
  -5   0  13   -9.83   26.52
  -5   0  13  -14.07   43.65
  10  -3   2  623.36  163.51
 -10  -3  -2  624.52  144.74
 -10   3  -2  541.20  181.76
  -4   6   3   57.72   41.86
  -4  -6   3   79.42   27.98
  -4  -6   3   97.47   36.29
  -4  -6   3   98.87   50.23
  13   2  -4  361.33   76.06
 -13  -2   4  459.39  161.82
 -13   2   4  504.87  164.54
 -13  -2   4  365.71   62.98
 -13   2   4  433.02  126.67
  -3   4  10 1074.07  165.39
  -3  -4  10 1123.75   80.31
  -3  -4  10 1099.51   73.23
 -13   0   9    2.37   38.52
 -13   0   9   -5.09   48.54
  -4  -6   0   82.75   20.06
  -4  -6   0   44.15   36.57
  -4   6   0   59.26   39.00
   4  -6   0  -25.08   52.31
  -4  -6   0   78.85   25.86
  -8  -4  -3  186.85   43.62
   8  -4   3  104.94   60.05
  -8   4  -3   -5.38   48.54
  -8  -4  -3  139.31   31.20
  -8  -3  11  157.68   47.00
  -8   3  11   90.59   70.08
  -8  -3  11   53.47   61.80
   8  -3 -11   95.50   35.01
   3  -5  -8  325.36   46.73
  -3   5   8  320.38   54.48
  -3   5   8  328.79  103.07
  -3  -5   8  302.75  146.80
  -3  -5   8  324.82   98.24
  -4  -5   8   34.87   20.99
   4  -5  -8   34.84   17.12
  -4   5   8   30.35   17.62
  -4   5   8   45.96   45.55
  -4  -5   8    7.61   43.74
  -4  -4  -7  604.18   90.36
  -4  -4  -7  737.24   40.54
  -4   4  -7  833.34  137.31
   4   4   7  613.76  127.97
   4  -4   7  547.75  107.47
   4   4   7  875.09   95.87
 -12  -3   3 1156.31  130.92
 -12   3   3  980.75   83.26
  12  -3  -3 1162.34  252.92
  12   3  -3 1064.92   33.65
  -3  -6   4 1455.60   75.60
  -3  -6   4 1409.08  107.02
  -3   6   4 1361.19   80.31
   3   6  -4 1416.26   60.09
  -3   6   4 1417.05   87.21
   2   0  11   11.05   14.62
  -2   0 -11   31.70   23.53
   2   0  11   -4.76   35.44
   3   3   9 9904.62  205.60
   3  -3   9 9285.51  262.88
  -3  -3  -9 9396.91  200.01
   3   3   9 9418.88  241.27
  -3   3  -9 9661.35  291.27
  -6   4  10 5099.05  157.07
  -6  -4  10 4722.65  160.10
  -6  -4  10 4966.73  286.77
  -6   4  10 4911.42  285.18
   6  -4 -10 5256.02  153.89
  -5  -1  -9 6432.87  135.33
   5   1   9 6822.88  223.51
  -5   1  -9 6374.90   99.41
   5  -1   9 6725.18  188.53
  -7   0  13   16.55   14.26
  -7   0  13  -10.25   29.82
   5   5   4   33.75   20.81
   5   5   4   19.39   20.19
  -5  -5  -4   13.80   10.19
  -5  -5  -4   22.12   15.88
  -5   5  -4   31.82   40.66
   5  -5   4   74.60   47.42
 -13   0   1   -8.58   46.37
  13   0  -1   21.31   12.49
  13   0  -1   25.07   24.97
  12   1   1 1503.27   51.38
  12   1   1 1352.12  131.92
  12  -1   1 1394.06   89.66
 -12  -1  -1 1362.20   75.96
 -12   1  -1 1298.16   81.76
  -4   0  13    4.91   13.93
  -4   0  13  -18.37   26.53
  -4   0  13   -9.66   46.59
  -7  -5   7 1187.21   48.85
  -7   5   7 1200.38  248.12
  -7   5   7 1310.43  127.01
   7  -5  -7 1074.97   63.42
   7   5  -7 1234.33   54.99
  -7  -5   7 1311.85  159.42
   0  -6  -4  364.10   96.93
   0  -6   4  431.86  121.81
   0   6  -4  286.73  200.48
   0  -6  -4  397.08   68.47
   0  -6  -4  358.13   39.88
   0   6   4  494.17  136.43
  -2  -2  1211841.40  276.43
  -2  -2  1211846.91  265.38
  -2   2  1211898.70  277.90
 -12   2   0 5031.74  191.83
  12  -2   0 5091.70  174.07
  -4   5  -513451.19  361.72
  -4  -5  -513231.30  284.17
   4   5   513597.47  289.95
   4  -5   512815.89  322.91
  -4  -5  -514135.25  295.36
  -4  -5  -513289.21  284.95
  11   0   3   26.14   28.71
 -11   0  -3   17.74   43.17
   2   5  -8  576.73  164.66
   2  -5  -8  518.25   54.91
   2  -5  -8  536.54   57.26
  -2  -5   8  642.66   83.07
  -2   5   8  456.50   76.14
  -5  -5   8  -37.37   56.11
  -5   5   8   55.25   30.98
  -5   5   8  272.54   76.28
 -10  -3  10    8.44   25.78
 -10  -3  10   22.43   17.91
 -10   3  10   28.25   36.04
 -10   3  10  -24.56   50.95
  10  -3 -10    9.80   17.39
   6  -5   3  926.91   71.14
  -6  -5  -3  827.87   32.09
   6   5   3  927.02   69.10
  -6  -5  -3  928.51   66.94
  -6   5  -3  961.12   86.07
  -1  -5  -7 5164.68  151.50
   1   5   7 5739.80   95.45
  -1   5  -7 5565.65  191.39
  -1  -5  -7 5731.09   84.51
   1  -5   7 5836.88  141.25
  -1  -5  -7 5602.51  172.54
 -13   2   7  328.50  116.41
 -13  -2   7  175.80  105.05
 -13   2   7  293.51   81.10
  13   2  -7  251.16   63.49
 -13  -2   7  295.74   41.75
  11   2   2 1354.74   84.38
  11  -2   2 1488.16   77.38
 -11  -2  -2 1486.35  199.03
 -11   2  -2 1345.24   91.53
 -10   1  12  550.30  158.10
 -10  -1  12  655.72  181.10
 -10  -1  12  722.85   68.15
 -10   1  12  502.40   41.37
  -3  -6  -2  219.44   63.17
  -3   6  -2  221.36   82.56
   3  -6   2  332.82  108.15
  -3  -6  -2  224.99   73.12
  -3  -6  -2  290.59   54.43
 -11   3   9  242.80   76.60
 -11  -3   9  251.36   79.52
  11   3  -9  219.10   45.78
 -11  -3   9   75.73  119.59
 -11   3   9  255.75   66.90
  -6  -1  13   12.10   13.76
  -6   1  13   11.89   17.84
  -6   1  13   26.41   14.92
  -6  -1  13  -44.14   29.73
  -6   1  13   24.78   35.87
   0   0  12 3362.05  128.07
   0   0  12 3150.20  164.52
   0   0 -12 3281.79  106.46
  13   2  -3    7.49   14.38
 -13   2   3   18.86   23.18
  13  -2  -3   16.51   23.45
 -13  -2   3   53.70   38.38
  13   2  -3   15.76   13.07
  -8  -5   6   81.62   32.33
  -8  -5   6  141.95   80.93
  -8   5   6   39.53   60.43
  -8   5   6  133.48   49.89
   8   5  -6  109.98   33.22
   2   6   3  265.75   55.48
  -2  -6  -3   92.59   43.96
  -2  -6  -3  190.37   64.07
  -2   6  -3   53.26   34.58
  -2  -6  -3  120.51   37.47
   2  -6   3  241.06   90.39
  12   3  -7 3155.46  111.25
 -12   3   7 3669.83  215.57
 -12  -3   7 3724.80  123.21
 -12  -3   7 3460.08  134.02
 -12   3   7 3416.23  155.30
  -5   1  13  504.10   69.24
  -5   1  13  445.60   44.43
  -5   1  13  484.34  139.56
  -5  -1  13  518.66   46.82
  -5  -1  13  469.47   50.35
  -7  -3  -6  124.81   29.80
   7   3   6   70.52   44.20
  -7   3  -6   32.00   39.63
  -7  -3  -6   97.64   56.49
   7   3   6   70.67   53.40
   7  -3   6  105.88   82.03
  -2  -4  10   82.29   72.05
  -2   4  10  132.08   63.41
   2   4 -10  101.92   53.38
   1   2  11   56.54   48.25
  -1  -2 -11   20.15    8.97
   1  -2  11   40.54   41.29
   1   2  11   20.84    8.14
  -1   2 -11   52.34   21.86
 -13   1   911461.83  292.69
 -13   1   911442.68  268.33
 -13  -1   911337.08  264.85
 -13  -1   911485.50  345.34
  -4   6   4 1646.26  114.11
  -4  -6   4 1713.31   71.72
  -4  -6   4 1760.31  184.11
   4   6  -4 1777.90   75.23
  -4   6   4 1744.63   95.64
  -8   2  -6   23.40   32.43
  -8  -2  -6   11.04   20.32
   8   2   6    6.64   21.43
  -8  -2  -6   24.96   20.18
   8  -2   6   11.67   29.68
   8   2   6    0.92   18.32
  -1  -3  11 4714.03  159.43
  -1   3  11 4362.79  182.81
   1   3 -11 4720.64  173.01
   7   2   7   -9.01   25.71
  -7  -2  -7    4.59   19.09
   7   2   7   18.53   15.45
   7  -2   7  -35.79   47.79
  -7   2  -7   16.42   45.36
  -7  -2  -7    8.21   14.07
  -8   3  -5  514.96  154.87
   8   3   5  520.68  114.22
  -8  -3  -5  444.12   72.84
   8   3   5  493.48   94.48
  -8  -3  -5  474.07   63.12
   8  -3   5  327.17  130.20
   2   1  11 1290.05  168.23
   2   1  11 1535.75   42.46
  -2   1 -11 1471.93   58.59
  -2  -1 -11 1455.07   76.52
   2  -1  11 1508.81   92.62
   2  -1  11 1411.57   83.42
  -8   0  13   -2.75   31.31
  -8   0  13  -15.19   30.89
   8   0 -13    8.45   18.36
   1   4   9  656.63  109.83
  -1   4  -9  733.72   58.94
   1  -4   9  646.95  166.02
  -4  -6  -1   -6.18   32.20
  -4  -6  -1   13.24   17.38
   4  -6   1   15.56   32.41
  -4   6  -1   23.30   36.84
  -4  -6  -1    3.34   11.88
  -8  -5   0   90.32   60.91
   8  -5   0  223.94   84.30
  -8   5   0  165.40   75.13
   4   0  10 4134.34  152.88
   4   0  10 4579.67  163.32
  -4   0 -10 3936.76  156.34
  -5  -6   2  227.67   26.88
   5  -6  -2  411.68   93.39
  -5  -6   2  280.33  135.19
  -5  -6   2  262.01   53.38
  -5   6   2  290.75   66.87
  -7   1  13  995.35  100.60
  -7   1  13  876.05   57.72
  -7  -1  13  937.24   74.97
   7  -1 -13  910.48   52.44
  -7  -1  13  955.30   73.80
  -3   2 -10  338.97   53.13
   3  -2  10  363.38  113.80
  -3  -2 -10  345.86   42.65
   3   2  10  432.50  132.00
   3   2  10  369.79   89.18
   6  -3   713761.00  401.62
  -6  -3  -715031.62  319.30
   6   3   713994.10  304.19
  -6   3  -713611.24  346.66
  -6  -3  -713980.88  349.55
 -13   1   1 3898.89  146.38
 -13  -1   1 3885.27  268.40
  13   1  -1 3989.26  143.14
  13   1  -1 4176.94  141.13
  13  -1  -1 3892.76  162.33
  -7  -4  1011457.49  387.91
   7  -4 -1011763.67  260.29
  -7   4  1011058.26  271.25
  -7  -4  1011133.67  259.23
  -7   4  1011429.14  246.30
 -10  -4   020178.29  436.57
  10  -4   019879.42  448.39
 -10   4   019601.92  479.94
 -14   0   5   77.53   44.89
 -14   0   5   15.74   19.07
  12   3  -2   40.99   15.52
 -12  -3   2    5.15   82.23
 -12   3   2   37.38   38.48
  12  -3  -2   65.79   47.29
  12   3  -2   41.69   15.02
 -14   0   6 3625.38  174.93
 -14   0   6 3191.68  137.42
  -3  -5  -6  579.10   55.66
  -3  -5  -6  590.11   93.17
   3  -5   6  744.92  143.77
  -3   5  -6  818.44   82.29
   3   5   6  685.50   60.63
  -3  -5  -6  699.64   78.14
  -4  -1  13 3386.70  122.45
  -4   1  13 3205.22  237.17
  -4   1  13 3642.21  137.13
   5  -6  -1   53.53   35.60
  -5   6   1  -26.86   40.52
  -5  -6   1   78.27   59.49
  -5  -6   1   38.61   12.51
  -5  -6   1   60.14   16.35
 -11   4   4  303.37   59.50
 -11  -4   4  241.78   26.01
 -11  -4   4  238.18   80.91
  11   4  -4  238.92   39.55
 -11   4   4  233.87   89.36
  -9  -2  12 2666.72  155.99
   9  -2 -12 2737.67  124.80
  -9   2  12 2666.36  213.60
  -9  -2  12 2570.42  157.25
  -9   2  12 2634.64  100.73
  11   1   3 4971.24  183.80
 -11  -1  -3 5652.01  193.24
 -11  -1  -3 5802.93   79.68
  11  -1   3 5237.05  227.11
 -11   1  -3 5131.84  177.65
  -5   6   3   70.50   33.96
  -5  -6   3   80.31   67.54
  -5  -6   3  142.32   42.19
   5  -6  -3  147.47   80.10
  -5  -6   3  115.82   43.47
  -9  -2  -5 1573.31   89.09
  -9  -2  -5 1425.62  104.12
   9   2   5 1418.92   87.68
   9  -2   5 1404.89   84.70
  -9   2  -5 1539.50   95.86
  -3   0  13   -1.99   19.90
  -3   0  13  -20.31   23.02
  -3   0  13   -8.53   48.86
  -1  -5   8  344.14   63.79
   1  -5  -8  297.60   54.02
   1   5  -8  388.20   75.36
   1  -5  -8  331.03   24.39
  -1   5   8  274.93  103.77
  -9  -4   9  870.05   68.42
  -9   4   9  784.55   89.15
  -9  -4   9  954.42  102.96
   9   4  -9  782.43   83.65
   9  -4  -9  733.69  101.54
  -9   4   9  851.32  112.35
 -11  -4   5   39.98   13.87
  11   4  -5   43.27   20.00
 -11  -4   5   46.28   55.31
 -11   4   5   35.77   27.69
 -11   4   5   50.28   16.40
  -7  -5  -2   83.80   42.94
  -7  -5  -2   41.08    8.83
  -7  -5  -2   68.04   11.47
   7  -5   2   97.71   45.12
  -7   5  -2   55.65   44.21
   1  -6   4 1179.41   67.80
  -1  -6  -4 1156.46   49.51
  -1  -6  -4 1310.86   88.93
  -1   6  -4 1141.83  133.07
  -1  -6  -4 1163.94   68.14
   1   6   4 1173.42  119.91
   9  -4   2 2015.93  127.57
  -9  -4  -2 1958.72  222.86
  -9   4  -2 2071.93  140.18
  -6  -5   8  -18.02   50.25
  -6   5   8   28.88   38.30
  -6  -5   8   43.44   20.97
  -6   5   8   15.71   18.80
   6  -5  -8   25.10   20.28
 -12   0  11   54.42   30.41
 -12   0  11    4.39   24.80
  -3  -4  -8 2773.71   85.29
  -3   4  -8 3036.60  145.26
   3   4   8 2794.12  124.02
   3  -4   8 2823.96  167.41
  -3  -4  -8 2828.14   99.65
   0  -1  12  794.88  102.70
   0   1  12  802.62  127.91
   0   1 -12  842.20   72.27
   0  -1  12  813.25   71.03
   0   1  12  831.01   84.39
 -10   4   8 3505.02  141.39
 -10   4   8 3306.52  199.95
 -10  -4   8 3477.19  133.37
  10   4  -8 3609.56  117.22
 -10  -4   8 3521.16  139.36
   2  -6  -5  178.52   55.01
  -2   6   5  231.33   60.53
  -2   6   5  182.71   40.86
  -2  -6   5  141.45   56.96
   6   2   8 2380.71  117.24
  -6   2  -8 2176.54   96.90
   6  -2   8 2307.69  148.48
   6   2   8 2558.10   93.38
  -6  -2  -8 2473.37   93.80
 -14   0   4 8916.37  222.38
 -11   4   3   83.74   57.10
  11  -4  -3   64.44   37.02
 -11  -4   3  107.81   57.45
   9  -3 -11   72.50   30.87
  -9  -3  11   67.86   68.10
  -9   3  11   63.39   40.70
  -9  -3  11  146.93   58.37
  -9   3  11  115.43   74.82
 -14   0   7   68.44   51.30
  -3   6   5   19.90   27.84
  -3   6   5    5.43   27.97
  -3  -6   5  -10.18   43.61
  -3  -6   5   17.90   39.32
   3  -6  -5   44.09   19.16
  -9   3  -4   -2.30   41.40
  -9  -3  -4    4.46   27.52
  -9  -3  -4   -2.65    6.67
   9   3   4    8.53   11.31
   9  -3   4  -11.94   36.28
 -13  -2   8  810.67   88.50
 -13   2   8  808.58  148.87
  13   2  -8  782.37   54.59
 -13   2   8  798.35   81.15
 -13  -2   8  878.12   84.52
  -9  -5   4  804.37   76.15
  -9  -5   4  844.42   38.58
  -9   5   4  777.45   84.43
  -9   5   4 1019.10  217.11
   9   5  -4  957.76   52.39
  -9  -5   3 8407.14  292.26
  -9   5   3 8750.54  263.56
   9  -5  -3 8352.82  279.18
  -8  -1  13 9039.09  242.74
  -8   1  13 9531.74  302.46
   8  -1 -1310061.74  221.98
  -8   1  13 9871.46  226.04
  -8  -1  13 9391.88  219.48
   1   6  -5  -43.07   55.95
  -1  -6   5   -1.98   16.27
  -1   6   5   25.40   23.34
   1  -6  -5   12.41   18.03
   4   1  10 1019.72   93.33
  -4   1 -10 1187.01   63.66
  -4  -1 -10  994.40   74.54
   4   1  10 1218.45   46.73
   4  -1  10 1170.68  132.82
  13   2  -2 4052.11  163.37
 -13   2   2 3837.83  152.55
  13  -2  -2 3857.17  162.96
 -13  -2   2 4155.43  152.50
  13   2  -2 4289.97  134.59
 -11   2  11 1671.94  109.99
 -11  -2  11 1786.92   89.50
 -11  -2  11 1960.55  192.83
 -11   2  11 1733.28  103.87
  -5  -3  -8   22.27   10.87
   5  -3   8   12.00   34.73
   5   3   8   17.09   12.63
   5   3   8  -50.46   30.45
  -5   3  -8  106.22   53.05
  -5  -3  -8    1.60   11.18
  -5  -6   0 4579.71  169.36
  -5   6   0 4633.08  163.68
  -5  -6   0 4789.43  147.67
  -5  -6   0 4567.80  134.78
   5  -6   0 4362.49  223.09
 -11   4   6 1617.41  106.37
  11   4  -6 1552.67   72.13
 -11   4   6 1565.67  165.78
 -11  -4   6 1482.04   43.96
 -11  -4   6 1677.21  162.39
 -14   1   5 1029.01  116.64
 -14   1   5 1020.04   69.23
 -14  -1   5 1053.53  131.83
  14   1  -5  976.77   66.63
 -14  -1   5 1088.84  146.16
 -11   0  12  338.64   84.25
 -11   0  12  330.08   89.35
  -1  -4  10  342.84   94.69
   1   4 -10  216.12   88.66
  -1   4  10  329.09   91.02
 -12  -2  10 1426.97  136.15
 -12  -2  10 1352.87  105.73
 -12   2  10 1291.33   68.04
 -12   2  10 1298.19  128.98
 -14  -1   6  466.57  130.78
 -14   1   6  351.21  107.51
  14   1  -6  389.02   63.57
 -14  -1   6  401.55  175.54
 -14   1   6  411.34   89.44
  11  -3   1 7470.29  241.91
 -11   3  -1 6764.96  231.99
  11   3   1 7370.58  168.61
 -11  -3  -1 7101.20  254.09
  -1  -2  12 4670.96  174.06
   1   2 -12 5311.43  193.15
  -1   2  12 4888.21  170.46
  -5   6   4   42.75   45.29
  -5   6   4   48.21   38.68
   5   6  -4  114.54   32.41
  -5  -6   4   31.65   20.48
  -5  -6   4   80.42   58.99
 -12  -3   8  118.24   63.57
  12   3  -8   30.17   25.65
 -12   3   8   11.95   30.64
 -12  -3   8   35.38   19.75
 -12   3   8   31.22   24.28
  -8   0  -7   19.84   16.71
   8   0   7   34.35   39.31
 -13   0  1013597.14  313.82
 -13   0  1013592.68  307.31
  -3   1  1315785.07  367.66
  -3  -1  1315813.09  346.20
  -3   1  1315656.95  329.91
  -3   1  1316225.73  341.23
  -3  -1  1316858.69  360.21
  -3  -1  1316242.68  371.22
  -9   0  13  -11.46   42.99
  -9   0  13  -19.75   29.86
   9   0   6 8341.01  294.13
  -9   0  -6 8432.40  221.19
  -9   5   5 7971.02  275.95
  -9   5   5 8584.75  270.88
   9   5  -5 9016.91  197.04
  -9  -5   5 8783.32  187.35
  -9  -5   5 8357.95  252.47
 -12   1  11 7665.81  206.79
 -12  -1  11 7487.20  191.95
 -12  -1  11 7416.16  204.43
 -12   1  11 7069.28  178.75
   9  -5  -2  321.32   97.22
  -9   5   2  148.76   43.86
  -9  -5   2  153.68   64.83
   4   6  -5   53.82   33.03
  -4   6   5  118.89   47.85
  -4   6   5   30.08   27.98
  -4  -6   5   81.80   49.99
 -10  -2  -414566.60  306.68
 -10  -2  -414303.72  318.93
 -10   2  -413983.22  324.55
  10   2   413806.61  302.47
  10  -2   413785.49  370.89
  -8   5   7 5051.58  199.03
  -8   5   7 4918.21  240.35
  -8  -5   7 4925.23  227.17
   8   5  -7 4896.52  155.10
  -8  -5   7 4971.52  154.39
  -2   3 -10  240.35  105.81
   2   3  10  230.15   62.69
   2  -3  10  168.94   98.37
  -3   6  -3   47.50   33.03
  -3  -6  -3   81.54   36.68
   3  -6   3   98.07   52.14
  -3  -6  -3   88.49   27.95
   3   6   3   67.34   44.62
  13   0   0 3463.57  125.92
 -13   0   0 3402.24  147.00
  -5   3  12  144.24   90.82
  -5  -3  12  323.41   93.23
  -5  -3  12  164.06   92.87
  -5   3  12  254.38   34.63
 -14   1   4   32.98   36.52
  14   1  -4   -8.64   29.58
  14   1  -4   -8.25   23.44
 -14  -1   4   24.22   55.68
  -8  -4  10 1250.10  131.69
  -8  -4  10 1113.61   77.84
  -8   4  10 1074.26  129.95
   8  -4 -10 1331.20   53.18
  -8   4  10 1248.97  116.52
  -4  -6  -2  159.02   46.46
  -4   6  -2  230.80   82.02
  -4  -6  -2  276.84   79.18
   4  -6   2  216.12   79.01
  -4  -6  -2  180.00   42.00
  -7   0  -8  482.47   68.99
   7   0   8  673.95  179.75
 -11   4   2 2264.96  169.05
  11  -4  -2 2204.36  245.72
 -11  -4   2 2171.61  112.12
   2  -5   7 9661.19  251.45
  -2   5  -710152.59  342.14
   2   5   710094.70  264.15
  -2  -5  -7 9608.40  205.25
  -2  -5  -710394.00  220.36
  -2  -5  -7 9889.12  220.31
  12   0   2  788.70  168.17
 -12   0  -2  795.08  130.47
 -14   1   7 2131.23  108.44
 -14   1   7 2042.24   92.14
 -14  -1   7 2013.73  150.27
 -14  -1   7 2131.08  107.11
  14   0  -3   17.25   20.34
 -14   0   3  -13.83   54.09
   6  -3 -12  319.51   33.78
  -6  -3  12  368.90  111.89
  -6   3  12  360.05  180.85
  -6  -3  12   30.40   34.02
   0  -6  -5    9.48   22.14
   0   6  -5  -14.50   51.82
   0  -6   5   59.37   34.80
   0  -6  -5   12.94    9.76
   0   6   5   22.81   13.94
   0   5   8   68.93   34.57
   0  -5  -8   18.09   11.06
   0  -5   8   44.73   30.78
   0   5  -8   -2.81   43.48
   0  -5  -8    5.38    7.58
 -14   0   8 4990.43  164.53
 -14   0   8 5040.56  206.85
 -12  -3   1 3556.67  136.99
  12  -3  -1 3795.04  149.34
  12   3  -1 3275.45   97.35
  12   3  -1 3821.15  111.13
 -12   3   1 3729.42  608.59
  -2   0  13   16.77   85.61
  -2   0  13  -39.50   24.11
  -2   0  13   10.60    7.91
   7   5  -8   28.99   25.15
   7  -5  -8   27.88   21.57
  -7  -5   8   26.92   28.21
  -7   5   8   -5.86   33.01
  -7   5   8   25.17   36.34
  -7  -5   8   21.07   20.67
   5  -2   9 1172.75  292.30
  -5  -2  -9 1059.87   38.26
  -5   2  -9 1138.96   60.93
   5   2   9 1084.69   77.94
   5   2   9 1212.63   67.75
  -7   4  -5  767.55   85.81
  -7  -4  -5  995.64   72.32
  -7  -4  -5  831.81   72.57
   7   4   5  789.42  100.80
   7  -4   5  941.82  268.44
   7   4   5  830.83   59.72
  -4   3  12  743.32   86.23
  -4  -3  12  721.87   56.62
  -4  -3  12  711.01   63.04
  -8   5  -1 1367.30  142.61
  -8  -5  -1 1119.71  136.19
   8  -5   1 1195.87  142.82
   6  -4   6 8187.98  235.88
  -6   4  -6 7967.42  225.67
  -2  -6  -4 7228.35  166.86
   2  -6   4 7111.16  198.13
  -2  -6  -4 7194.81  179.36
  -2  -6  -4 6920.25  169.60
   2   6   4 7036.64  179.78
  -2   6  -4 6941.29  222.54
   0  -3  11    7.87   28.27
   0   3 -11    5.65   30.50
   0   3  11   -8.25   35.31
 -11   1  12 1320.42   67.18
 -11  -1  12 1358.55   75.52
 -11   1  12 1377.16   84.61
 -11  -1  12 1466.98  104.52
 -12   2  -1  180.84   59.82
 -12  -2  -1  331.04   88.37
  12   2   1  193.96   42.98
  12   2   1  234.30   70.67
  12  -2   1  302.23   68.88
   8   1   7  823.86  124.09
  -8  -1  -7  741.94   46.10
  -8   1  -7  851.71   46.76
   8  -1   7  697.90  109.82
 -10   0  -5   32.62   32.14
  10   0   5   21.23   18.62
 -13   1  10   93.44   51.23
 -13   1  10  131.54   62.64
 -13  -1  10   31.44   75.45
 -13  -1  10  132.95   46.50
 -10  -3  -3  345.49   39.11
  10  -3   3  382.58  123.66
  10   3   3  312.07   56.36
 -10   3  -3  421.20  119.33
 -10  -3  -3  364.33   95.97
  11   4  -7   83.48   25.13
 -11  -4   7   45.95   23.37
 -11   4   7  100.32   46.10
 -11  -4   7   62.28   56.41
 -11   4   7   29.33   39.04
  -6  -6   2 8370.36  225.98
  -6  -6   2 8122.43  177.40
  -6  -6   2 8184.65  176.16
  -6   6   2 8263.74  216.14
   6  -6  -2 7931.98  218.51
  -9  -1  1317877.91  410.92
  -9   1  1317171.69  409.57
  -9   1  1316982.58  388.68
  -9  -1  1317796.20  407.93
   9  -1 -1317971.33  378.14
  -9   1  -6  541.63   86.37
   9  -1   6  591.34  138.80
  -9  -1  -6  623.51   61.74
   9   1   6  595.74  103.26
  -6  -6   3   71.14   34.75
  -6   6   3  100.76   55.54
   6  -6  -3  102.72   48.58
  -6  -6   3  163.68   58.15
  -6  -6   3  188.72   45.52
 -10   2  12   62.45   36.64
 -10  -2  12  -31.05   41.05
 -10   2  12   -3.70   44.87
 -10  -2  12   10.22   37.92
  10  -2 -12    0.80   22.20
   7  -3 -12    8.54   11.09
  -7  -3  12   37.24   29.21
  -7   3  12   -4.70   17.53
  -7   3  12   14.05   34.23
  -7  -3  12  -13.69   39.65
  -5   6  -1  208.76   81.19
  -5  -6  -1  183.48   37.19
   5  -6   1  273.83   60.96
  -5  -6  -1  109.45   55.65
  -5  -6  -1  238.06   42.22
   1   0  12  240.51  128.97
  -1   0 -12  198.41   63.24
   1   0  12  176.31   55.92
 -11  -3  10   40.29   48.46
 -11  -3  10   42.90   35.84
 -11   3  10   63.48   34.32
 -11   3  10   23.70   39.21
  -6   2  13  770.77  144.76
  -6  -2  13  929.79   77.51
  -6   2  13  862.14   47.24
  -6  -2  13  899.66   60.79
  -9   5   6  511.74  163.57
  -9   5   6  443.07   82.75
  -9  -5   6  603.69  186.17
   9   5  -6  520.57   62.23
  -9  -5   6  423.06   89.24
   8  -4   4 2158.54  210.25
  -8   4  -4 2452.12  204.23
  -8  -4  -4 2359.98   82.96
  -8  -4  -4 2177.15  111.64
   9  -5  -1  770.76  188.27
  -9   5   1  712.09  129.33
  -9  -5   1  691.96  188.64
 -10  -4  -1   49.96   79.80
  10  -4   1  241.83   81.26
 -10   4  -1  133.06  108.21
   3   0  11    3.00   23.56
   3   0  11   71.72   41.52
  -3   0 -11    6.68   16.23
   5   6  -5  198.49   61.44
  -5  -6   5   82.12   42.36
  -5   6   5  189.70   74.52
  -5   6   5  121.94   45.63
 -13  -1   0  127.12   79.12
 -13   1   0  194.74   62.11
  13   1   0  123.06   48.66
  13   1   0   83.15   47.30
  13  -1   0   95.55   71.32
  -5  -2  13 1256.67   78.11
  -5  -2  13 1186.02  135.87
  -5   2  13 1147.83  140.47
  -5   2  13 1244.29   58.69
   5  -5   5 1282.39  212.25
   5   5   5 1213.69   50.78
  -5  -5  -5 1251.50   74.06
  -5  -5  -5 1335.08   77.54
   5   5   5 1339.27   66.53
  -5   5  -5 1239.75  181.68
  -2  -4  -9  169.54   21.19
   2  -4   9  252.43   77.21
   2   4   9   87.95   59.70
  -2   4  -9  205.92   85.60
   7  -1   8   64.55   53.16
  -7  -1  -8   50.09   27.56
  -7   1  -8   61.13   39.17
   7   1   8   65.85   23.98
   7   1   8   55.45   21.75
  -5  -4  -7  266.02   74.99
  -5   4  -7  384.34  107.59
   5  -4   7  386.08  101.07
   5   4   7  183.93   96.71
  -5  -4  -7  267.07   86.88
   5   4   7  293.43   63.98
   6   5   4   -1.26   15.58
  -6  -5  -4   -1.95   27.16
  -6  -5  -4    2.65    7.92
  -6   5  -4   24.58   35.59
   6  -5   4   -3.89   48.17
   4  -3   9  529.55  198.26
  -4   3  -9  449.22  164.89
   4   3   9  450.59   86.10
  -4  -3  -9  448.06   41.88
   4   3   9  477.32   97.28
 -12  -1  -2 1515.30   77.77
  12   1   2 1579.82  100.24
  12   1   2 1667.20  129.37
  12  -1   2 1542.88  164.49
 -12   1  -2 1449.36   79.64
 -13   2   9   23.81   24.96
 -13  -2   9   37.30   29.92
 -13  -2   9   -7.68   27.40
 -13   2   9  -29.31   41.85
  13   2  -9   24.37   25.84
  14  -1  -320950.42  453.17
 -14  -1   319629.33  434.10
 -14   1   320480.38  453.21
  14   1  -320410.32  430.25
  14   1  -320583.14  443.20
  -6   0  -9   29.90   19.20
   6   0   9  -21.72   37.37
  -4   5   9  190.34   79.72
  -4   5   9  126.75   31.57
  -4  -5   9  213.64   67.82
   4  -5  -9  144.03   35.40
  -4  -5   9  190.99   50.31
   6  -6  -1   17.44   25.11
  -6   6   1   21.71   27.07
  -6  -6   1   12.82   14.11
  -6  -6   1   13.72    9.19
  -6  -6   1   25.29   20.65
  -3  -3  12  285.86   86.70
  -3  -3  12  128.33  116.45
  -3   3  12  246.03   81.58
 -14  -1   8  103.85   41.10
 -14  -1   8  103.42   41.74
 -14   1   8   76.48   56.82
 -14   1   8   15.04   38.80
   2   2  11  148.40   41.72
   2  -2  11  208.17   63.86
  -2   2 -11  188.46   67.19
  -2  -2 -11  141.42   23.55
   2   2  11  182.46   93.39
  -2  -1  1314969.53  325.09
  -2  -1  1313940.22  324.41
  -2   1  1315957.53  331.43
  -2  -1  1315552.88  337.46
  -2   1  1315089.05  349.80
   7  -2 -13 1030.76   65.78
  -7  -2  13 1025.14   71.09
  -7   2  13  971.29   52.57
  -7  -2  13 1003.94   80.03
  -7   2  13 1157.11  296.29
  -3  -5   9  116.67   45.04
  -3  -5   9  125.06   46.21
  -3   5   9  100.82   63.00
  13  -2  -1   20.04   16.27
  13   2  -1  -12.04   15.36
  13   2  -1    8.07   25.17
 -13  -2   1    2.23   29.52
 -13   2   1   29.54   41.52
   0   4  10  841.35  133.71
   0  -4  10  833.51   73.11
   0   4 -10  864.59  210.81
  -6  -6   4 1593.96  187.38
  -6   6   4 1708.87   95.06
  -6   6   4 1606.33   80.29
  -6  -6   4 1657.75   47.35
   6   6  -4 1636.59   57.40
  -5  -5   9   86.58   51.62
  -5   5   9  112.55   31.79
   5  -5  -9   88.79   27.68
  -5  -5   9  106.22   69.89
  -5   5   9   59.81   38.12
 -10   3  11 1767.63   82.25
 -10  -3  11 1754.28   94.01
 -10   3  11 1645.95  216.78
 -10  -3  11 1696.49  122.66
  10  -3 -11 1641.60  117.34
   1   6   5  304.69   98.16
  -1  -6  -5  234.15   66.87
  -1  -6  -5  289.80   64.93
   1  -6   5  331.14   88.17
  -1  -6  -5  175.46   68.21
  -1   6  -5  604.75   61.62
 -10  -4   9  135.61   81.65
 -10   4   9  150.44  112.44
 -10  -4   9  193.01   47.48
  10   4  -9  178.32   51.77
 -10   4   9  157.33   41.43
  -4  -2  13  988.12   63.98
  -4   2  13 1110.66  157.82
  -4  -2  13 1159.64   94.35
  -4   2  13 1067.32   39.01
  -4   2  13 1096.75   46.05
  -5   4  11  157.10   36.50
  -5  -4  11  210.09   91.25
  -5  -4  11  246.00   71.50
  -5   4  11   -2.87   47.01
   5  -4 -11  155.24   29.23
  -3   6   6 7277.01  229.42
  -3   6   6 7639.37  220.36
   3  -6  -6 7810.97  208.70
  -3  -6   6 7017.83  312.09
  -3  -6   6 6961.22  265.42
  10  -1   510743.99  314.92
  10   1   511229.20  567.64
 -10  -1  -510980.04  311.46
 -10   1  -511239.16  378.47
  11   2   3  970.14  100.87
 -11  -2  -3  950.43   44.15
  11  -2   3  958.17  138.67
 -11   2  -3  986.43   97.25
 -11  -2  -3  891.32   94.04
   2   6  -6   71.56   65.70
  -2   6   6   33.27   39.44
  -2  -6   6   91.73   48.24
  -2   6   6   67.89   46.04
   2  -6  -6   73.77   22.03
  -4  -5  -6  113.01   25.39
   4  -5   6  175.69   77.14
  -4  -5  -6   82.20   20.29
  -4  -5  -6   94.13   28.35
   4   5   6  105.09   35.52
  -4   5  -6   92.80   41.42
 -11   4   1   34.41   36.59
 -11  -4   1   -4.43   33.71
  11  -4  -1   52.63   30.36
 -10   0  13  -15.04   43.91
 -10   0  13   10.78   13.56
  -7  -5  -3  447.87   68.74
   7   5   3  517.57   31.80
  -7  -5  -3  504.97   33.87
  -7   5  -3  483.28  135.31
   7  -5   3  472.62  129.54
 -13  -3   5 8517.66  296.10
  13   3  -5 8996.85  222.26
 -13  -3   5 8775.17  219.32
 -13   3   5 8011.81  246.15
 -13   3   5 8669.15  383.51
  -4  -4  11   86.26   43.40
  -4  -4  11   -0.58   42.53
  -4   4  11  -10.58   37.82
  12   3  -9  800.01  113.09
 -12   3   9  899.13  135.62
 -12   3   9  661.63  102.92
 -12  -3   9  846.68   67.12
 -12  -3   9  897.48   63.67
  14   0  -229120.61  700.17
 -14   0   229948.35  736.07
   1  -1  12  254.26  106.92
   1   1  12  217.12   63.98
  -1   1 -12  287.45   94.52
  -1  -1 -12  186.83   42.54
   1   1  12  215.69   51.42
   0  -2  12   19.53   31.97
   0   2 -12   39.26   26.96
   0   2  12   -1.39   11.72
   0   2  12    0.90    5.00
   0   2  12   -4.41   36.92
  -6  -4  11   -1.84   47.43
   6  -4 -11   -5.82   11.64
  -6   4  11   -7.60   50.65
  -6  -4  11   -3.83   37.48
  -8   3  12  919.93  188.91
  -8  -3  12  789.56  155.63
   8  -3 -12  825.14   61.22
  -8   3  12  931.85   89.65
  -8  -3  12  871.47   79.96
 -13  -3   6   83.45   42.99
  13   3  -6   65.92   34.39
 -13   3   6   92.71   44.71
 -13  -3   6   49.44   17.34
 -13   3   6   43.63   61.38
  -3  -1 -11 1559.32   83.07
   3  -1  11 1916.88  132.02
   3   1  11 1853.08  152.20
   3   1  11 1883.12  100.24
  -3   1 -11 1516.51   53.83
 -14   0   9   37.36   36.11
 -14   0   9    7.54   12.77
 -13  -3   4   17.65   48.44
  13   3  -4    2.21    7.64
  13  -3  -4  -15.82   46.58
  -4  -6   626233.45  647.72
  -4   6   627096.30  668.44
  -4   6   626434.53  655.22
  -4  -6   625050.03  608.48
   4  -6  -628198.09  676.30
 -11   0  -427225.21  712.35
  11   0   426701.31  771.71
  -2  -5   9   65.59   25.57
   2  -5  -9   57.88   12.35
  -2   5   9   88.52   48.17
   2  -5  -9   58.83   13.90
   2   5  -9   74.06   44.49
  -9   4  10 1709.83  107.54
  -9   4  10 1480.50   78.69
  -9  -4  10 1591.13   88.13
   9  -4 -10 1735.46   50.73
  -9  -4  10 1564.24  104.97
   6  -1   9 5612.70  258.47
   6   1   9 6392.73  245.35
  -6  -1  -9 5794.96  222.16
  -6   1  -9 5527.22  221.17
   6   1   9 5401.60  219.64
  -9  -4  -3  259.21   37.76
  -9   4  -3  217.98  109.32
   9  -4   3  219.90   93.44
  -9  -4  -3  214.01   65.83
   9   4   3  247.37   49.19
   1  -6  -6    3.06   17.95
  -1   6   6   26.43   25.51
   1  -6  -6   24.15   17.40
   1   6  -6   50.45   53.93
  -1  -6   6   54.33   29.15
  -6  -6   017926.44  424.03
  -6  -6   018159.60  429.59
  -6  -6   017656.41  451.42
  -6   6   018262.20  471.49
   6  -6   017092.58  429.94
  -1   5  -8   82.07   51.40
   1  -5   8   65.95   73.33
   1   5   8   67.39   34.34
  -1  -5  -8   24.16   18.34
  -1  -5  -8   66.31   18.05
  -6   5   9  601.62   81.37
  -6   5   9  552.98   76.12
  -6  -5   9  708.42   79.58
  -6  -5   9  666.81   80.29
   6  -5  -9  597.86   27.37
   8  -2 -13  206.11   54.15
  -8  -2  13  313.98   82.14
  -8  -2  13  285.46   75.95
  -8   2  13  168.22   81.47
  -8   2  13  268.29   99.20
   8   5  -8  696.19   71.19
  -8   5   8  501.61  184.28
  -8   5   8  654.70  166.34
  -8  -5   8  690.72  176.48
   8  -5  -8  577.67   76.92
  -8  -5   8  576.14  133.32
   4   6   3  148.50   66.43
   4  -6   3  218.06  100.55
  -4   6  -3  129.11  101.56
  -4  -6  -3  105.40   30.91
  -4  -6  -3  192.90   35.98
  -4  -2 -10  746.45   45.14
   4   2  10  808.27   86.63
   4   2  10  802.71   66.43
   4  -2  10  852.61  101.52
  -4   2 -10  713.75   70.86
   4  -4   8 4083.18  199.91
  -4  -4  -8 3695.04  148.80
   4   4   8 3819.84  145.69
  -4  -4  -8 3788.51  176.33
   4   4   8 3662.24  153.42
  -4   4  -8 3893.78  194.33
  -3  -4  11  188.80   80.70
  -3  -4  11  175.42   72.45
  -3   4  11   92.36   35.67
  -1   0  13   10.71    9.20
  -1   0  13   -4.22   13.96
  -1   0  13  -20.00   43.24
  14   2  -5  513.02   88.41
 -14  -2   5  651.34   47.66
 -14  -2   5  584.69   67.53
 -14   2   5  679.16  218.62
 -14   2   5  662.62   79.91
 -14  -2   618660.10  457.59
  14   2  -618506.90  456.33
 -14   2   617899.05  469.93
 -14  -2   617456.51  510.78
 -14   2   616815.70  432.01
 -11  -4   810808.82  277.46
 -11   4   810873.09  301.51
 -11   4   810884.79  299.10
 -11  -4   810566.87  307.88
  11   4  -811039.52  277.28
  -3  -6  -413901.69  348.22
  -3  -6  -414642.08  367.78
   3   6   413200.56  339.55
   3  -6   413889.81  425.41
  -3   6  -414322.20  387.80
  -3  -6  -413951.38  340.01
  -9   5   7  116.22   50.93
   9   5  -7   84.07   26.56
  -9  -5   7   58.55   79.79
  -9  -5   7   36.28   42.82
  -9   5   7   67.38   30.80
  -2   3  12   30.19   29.80
  -2  -3  12   12.55   26.09
   2   3 -12   43.11   38.76
  -9   5   0   41.62   48.86
   9  -5   0   34.29   31.90
  -9  -5   0   59.59   45.11
  12   3   0    7.68   11.95
 -12  -3   0   43.39   23.21
  12  -3   0  -14.98   44.87
 -12   3   0   24.58   39.46
  12   3   0   31.42   21.18
 -12   0  12 3561.55  153.39
 -12   0  12 3681.46  174.91
  -6  -6   5   51.83   39.25
  -6   6   5   50.07   35.83
  -6   6   5   62.32   48.41
  -6  -6   5   37.52   29.02
   6   6  -5   33.58   24.46
  -3  -2  13 1319.24   85.85
  -3   2  13 1147.42   37.41
  -3   2  13 1328.49  160.78
  -3   2  13 1331.63   28.50
  -3  -2  13 1357.02  101.69
 -10   1  13 9371.75  247.01
 -10   1  13 9249.16  259.71
 -10  -1  13 9366.57  257.17
 -10  -1  13 9365.35  262.99
 -13   0  11  -13.65   42.37
 -13   0  11   20.95   18.85
  -5   6  -2   37.40   45.28
  -5  -6  -2   39.97   14.19
  -5  -6  -2   23.19   14.50
  -5  -6  -2   41.96   24.51
   5  -6   2  104.22   51.80
 -13  -3   7  324.99   97.08
  13   3  -7  341.68   87.28
 -13   3   7  167.90   65.94
 -13  -3   7  358.34   37.46
 -13   3   7  379.15  122.39
 -14  -1   2  177.67   99.83
  14   1  -2  152.49   62.46
  14   1  -2  251.33   64.33
 -14   1   2  188.55  106.97
  14  -1  -2  114.06   52.88
  11  -3   2  116.87   70.38
  11   3   2   76.49   28.92
 -11  -3  -2  165.86   70.26
 -11   3  -2  105.87  108.65
 -12  -2  11  719.03   79.33
 -12   2  11  681.69  179.12
 -12   2  11  511.84  213.64
 -12  -2  11  624.85  133.51
  -7   4  11  458.78   57.83
  -7   4  11  554.90   77.10
  -7  -4  11  720.84  201.43
   7  -4 -11  476.94   52.25
  -7  -4  11  528.57  135.40
  -5   0 -1011322.40  287.61
   5   0  1011975.77  316.69
  -3   5  -7 7059.38  282.87
  -3  -5  -7 6878.89  267.32
   3   5   7 6368.68  244.96
  -3  -5  -7 6353.85  234.08
  -3  -5  -7 6571.07  242.11
   3  -5   7 6253.17  249.66
 -13   3   3  732.15  101.93
 -13  -3   3  896.00  128.26
  13   3  -3  728.19   43.52
  13  -3  -3  809.26  212.78
 -14   1   9 5613.86  230.13
 -14  -1   9 5739.98  264.73
 -14  -1   9 5573.77  219.84
 -14   1   9 5801.67  269.06
   8  -5   2  126.00   47.05
  -8   5  -2   72.81   41.89
  -8  -5  -2   33.50   25.82
  -5   6   627672.22  679.91
  -5   6   629228.49  717.16
  -5  -6   627949.10  671.24
  -5  -6   628322.86  697.20
  14  -2  -4   77.43   30.25
  14   2  -4   19.42   18.97
 -14   2   4  -23.30   53.85
 -14  -2   4   37.03   49.39
  14   2  -4   17.69   12.19
 -11  -1  -4  285.60   59.19
  11  -1   4  112.83   53.99
 -11   1  -4  281.73  151.26
  11   1   4  270.88   87.72
 -11  -1  -4  334.01  103.13
   1   3  11 5437.03  223.11
   1  -3  11 5656.87  240.73
  -1   3 -11 5544.70  233.14
 -14  -2   7   44.71   41.69
 -14   2   7   48.74   55.19
  14   2  -7   12.93   16.03
 -14  -2   7   45.02   28.37
 -14   2   7   44.62   15.47
   8  -3   6  211.55   96.18
   8   3   6  112.55   58.14
  -8  -3  -6  221.10   54.85
   8   3   6   89.55   36.30
  -8  -3  -6  177.48   43.96
  -8   3  -6  162.47   79.60
 -13   0  -1   56.31   27.22
  13   0   1  -29.28   31.83
 -10   5   4   41.05   22.60
 -10  -5   4   61.32   61.62
  -7   3  -7 7746.50  340.48
   7  -3   7 7569.39  242.45
  -7  -3  -7 8789.91  225.59
   7   3   7 7881.84  236.26
   7   3   7 8682.15  265.36
  -7  -3  -7 7927.64  227.38
  -6   0  14  107.84   26.69
  -6   0  14  129.15   60.94
  -6   0  14  121.77  135.35
   0   6  -6 1685.13  128.76
   0  -6   6 1705.28  209.35
   0  -6  -6 1634.32   47.53
   0  -6  -6 1555.41   84.80
   0   6   6 1686.16  125.23
   1  -5  -9   64.53   11.73
   1  -5  -9   74.77   14.51
  -1   5   9   92.55   44.67
   1   5  -9   95.65   79.22
  -1  -5   9   99.38   73.60
  -3   3 -10   34.26   36.05
   3  -3  10   40.61   44.85
   3   3  10   14.88   30.99
  -3  -3 -10    9.94    8.40
   3   3  10   10.30    9.60
   2   6   5   61.63   45.61
  -2  -6  -5   54.55   26.19
   2  -6   5   68.56   42.52
  -2  -6  -5   55.45   31.08
  -2  -6  -5   50.44   25.20
  -2   6  -5   81.02   54.23
  -1   1  13 4141.04  223.64
  -1   1  13 4547.43  179.36
  -1  -1  13 4284.06  188.18
   1   1 -13 4681.86  209.21
 -10   5   3   46.85   52.30
 -10  -5   3   10.28   25.30
  10  -5  -3   26.60   43.38
   7  -6  -3  575.43  109.78
  -7  -6   3  446.72  158.09
  -7  -6   3  407.65   39.01
  -7  -6   3  401.90   62.23
  -7   0  14 3266.69  175.98
  -7   0  14 3317.32  192.85
  -7   0  14 3000.17  219.02
 -12  -4   5   72.26   17.23
 -12   4   5   -6.32   46.76
 -12   4   5   50.31   44.67
  12   4  -5   34.22   21.81
 -12  -4   5   30.06   34.21
 -11  -2  12 7719.45  256.08
 -11   2  12 7211.57  197.99
 -11   2  12 7481.56  258.81
 -11  -2  12 7295.48  235.39
 -10   5   5   74.01   37.36
  10   5  -5   18.16   14.61
 -10  -5   5    2.01    6.40
 -10   5   5   26.94   32.21
 -10  -5   5   31.01   53.15
  -2  -4  11  588.95   59.34
  -2   4  11  493.33   86.20
   2   4 -11  627.10  182.62
  -5   0  14  348.21  139.45
  -5   0  14  295.19   96.26
  -5   0  14  276.80   75.18
  -7  -6   228279.44  663.27
   7  -6  -227448.79  683.90
  -7  -6   228654.40  748.64
  -7   6   229207.95  722.38
  -7  -6   229836.86  698.60
  -7  -5   9   56.46   44.89
  -7   5   9   40.84   55.45
  -7  -5   9   38.85   26.63
   7  -5  -9   56.51   21.43
  -7   5   9   48.67   17.55
 -12  -4   4   48.40   35.83
  12  -4  -4   36.11   23.35
 -12   4   4   77.20   67.55
  12   4  -4    9.63    3.88
  12   4  -4   14.48    6.18
  -8  -2  -7  224.87   82.48
  -8   2  -7  165.60   78.34
   8  -2   7  163.91   91.76
   8   2   7  170.81   61.28
   8   2   7  171.34   50.35
  -9   3  12  174.49   71.15
   9  -3 -12  139.42   56.78
  -9  -3  12  112.73   36.50
  -9   3  12  201.52   51.36
  -9  -3  12  162.84   60.25
 -13   2  10  252.06   77.92
 -13   2  10  257.85   74.66
 -13  -2  10  236.63   63.09
 -13  -2  10  332.57   87.47
 -12  -1  12 1262.41  131.80
 -12   1  12 1300.41   82.03
 -12   1  12 1100.02  155.53
 -12  -1  12 1041.09   57.13
   9   3   5 3248.24  140.33
  -9   3  -5 3242.78  165.42
  -9  -3  -5 2983.66  125.75
   9  -3   5 3447.72  177.30
  -9  -3  -5 3294.57  164.60
 -13   1  11 3231.80  262.24
 -13  -1  11 3390.19  183.96
 -13  -1  11 3577.89  244.33
 -13   1  11 3129.70  141.09
  -9  -2  13   21.25   42.88
  -9  -2  13  -55.75   41.84
  -9   2  13  -45.46   32.83
  -9   2  13    9.04   48.50
   9  -2 -13   -1.54   13.95
   9   2   6  308.03   88.87
  -9  -2  -6  404.66  113.78
   9  -2   6  416.80  117.20
  -9   2  -6  429.74  146.87
  -9  -2  -6  349.78   87.19
  11  -4   012161.15  408.92
 -11  -4   012487.14  358.11
 -11   4   012562.63  339.73
  -6  -6  -1  113.20   52.47
  -6  -6  -1  136.30   29.88
   6  -6   1  192.23   73.29
  -6   6  -1  132.52   50.05
  -6  -6  -1   95.07   21.48
   5   1  10  284.94   93.92
   5  -1  10  278.80   90.65
  -5  -1 -10  384.86   52.47
   5   1  10  281.86   81.06
  -5   1 -10  323.85  100.83
  -7   6   4 2439.94  205.76
  -7   6   4 2458.97  123.66
  -7  -6   4 2655.93  153.50
  -7  -6   4 2545.86  100.38
  -1   4 -10 7083.15  285.48
   1  -4  10 7429.26  219.55
   1   4  10 7449.22  213.71
 -12   4   6  467.44  123.31
 -12  -4   6  431.71  187.19
 -12   4   6  535.74  169.51
  12   4  -6  446.08   96.93
 -12  -4   6  475.86   41.63
  -6  -3  -8   16.34   14.22
   6   3   8    5.08   12.05
  -6   3  -8   22.20   34.55
   6  -3   8   44.01   26.86
  -6  -3  -8   15.32   17.09
   6   3   8   -3.62   20.19
  13  -2   0  668.18  157.99
  13   2   0  608.68   92.56
  13   2   0  565.12   89.71
 -13  -2   0  663.31  216.00
 -13   2   0  514.91   56.67
 -10   4  -2  151.59   51.76
  10  -4   2  102.17   77.57
 -10  -4  -2  140.71   38.81
  14   0  -1   62.99   40.65
 -14   0   1   60.05   40.47
   7   2   8 2271.27  172.91
   7   2   8 2320.55  103.84
  -7   2  -8 2346.45  162.56
  -7  -2  -8 2345.97  124.60
   7  -2   8 2386.26  280.37
 -12  -2  -2 1759.53  183.23
  12   2   2 1573.35  116.09
  12  -2   2 1647.60  168.67
  12   2   2 1981.96   91.76
 -12   2  -2 1779.81  107.89
  14  -2  -3   59.82   42.01
 -14   2   3   30.38   24.49
  14   2  -3   57.68   33.90
  14   2  -3   28.62   28.25
 -14  -2   3  -16.78   58.66
 -11   0  13   -7.33   36.24
 -11   0  13   48.59   33.14
 -13  -1  -1  -10.63   42.43
  13   1   1   12.81   21.15
  13   1   1   34.42   21.69
 -13   1  -1  -39.29   43.74
  13  -1   1   48.55   55.83
  12   0   3   45.37   20.70
 -12   0  -3   21.03   39.91
 -13   3   8   -7.87   41.04
 -13   3   8  -19.10   48.58
  13   3  -8   -6.21   20.28
 -13  -3   8    4.64   15.48
 -13  -3   8   44.51   22.33
  -8   0  1411973.86  317.82
  -8   0  1412282.02  332.66
 -10  -5   2   95.14   98.90
  10  -5  -2  247.44   75.07
 -10   5   2  313.75   68.50
  -8  -4  11  175.45   45.26
  -8  -4  11  151.20   73.71
  -8   4  11  140.36   40.16
  -8   4  11  143.70   88.48
   8  -4 -11  100.21   44.76
   2   0  12  331.61  105.58
   2   0  12  381.97  139.61
  -2   0 -12  399.14   67.33
  12  -4  -3   75.57   57.79
 -12  -4   3   13.36   37.32
 -12   4   3   27.84   41.67
  -6   1  14 1755.72  120.87
  -6  -1  14 1544.60   83.55
  -6   1  14 1612.63   50.25
  -6  -1  14 1575.87   65.88
  -7  -6   1  526.04   39.60
  -7  -6   1  582.01   33.96
  -7   6   1  558.06  131.48
   7  -6  -1  665.42  196.82
  -7  -6   1  607.75  151.19
 -14   2   8 2048.68  139.87
 -14   2   8 2095.30  175.15
  14   2  -8 1894.39  119.91
 -14  -2   8 1802.00  108.16
 -14  -2   8 1998.84   99.27
 -14   0  1017003.98  457.96
 -14   0  1017431.77  441.46
  -2  -2  13 1985.52  138.86
  -2  -2  13 2194.31  188.60
  -2   2  13 1983.90   72.58
  -2   2  13 2157.10   77.26
  -2   2  13 1886.82  137.78
   3   4   9  432.39  120.46
  -3  -4  -9  388.49   23.29
  -3   4  -9  439.19  149.41
   3  -4   9  540.45  139.66
  -3  -4  -9  356.15   29.08
  -4   0  14 8124.49  246.39
  -4   0  14 7265.70  192.77
  -4   0  14 7212.96  100.33
  13   3  -2  333.47   52.65
 -13   3   2  400.00  115.14
 -13  -3   2  361.57  177.35
  13  -3  -2  426.18  103.37
 -11  -3  1111719.05  335.61
 -11  -3  1111661.94  302.31
 -11   3  1111282.08  290.62
 -11   3  1113191.32  353.31
 -10  -5   6  243.66   63.62
 -10   5   6  423.11  138.08
 -10   5   6  287.85  125.81
 -10  -5   6  194.33  122.25
  10   5  -6  284.20   55.40
  -7   1  14  321.05   62.04
  -7   1  14  338.91  132.35
  -7  -1  14  304.23   89.60
  -7   1  14  219.28   61.42
  -7  -1  14  407.59  118.23
   6   6  -6 6368.06  239.97
  -6  -6   6 6601.58  253.35
  -6  -6   6 7153.68  156.67
  -6   6   6 6386.00  308.44
  -6   6   6 6644.36  295.52
 -12  -3  10  151.74   55.35
 -12   3  10  119.80   45.32
 -12   3  10  102.09   72.97
 -12  -3  10  157.42   66.66
  -1   3  12   -1.63   25.10
  -1  -3  12   71.10   66.52
   1   3 -12   11.04   15.75
 -15   0   6 1253.12  123.18
 -15   0   6 1185.60  133.67
  -5   1  14   74.67   53.26
  -5   1  14   32.12   23.97
  -5   1  14   60.25   29.83
  -5  -1  14   67.23   58.43
  -5  -1  14  141.42   34.95
 -10  -2  -5 2242.93  108.91
 -10   2  -5 2011.86  109.62
  10  -2   5 1971.45  111.26
 -10  -2  -5 2135.65  181.59
  10   2   5 2024.30  157.26
   3  -6  -7   22.75   18.88
  -3  -6   7   22.35   21.74
  -3   6   7   11.65   13.89
  -3   6   7   17.87   32.18
  -3  -6   7   34.06   36.98
 -15   0   5   23.76   22.35
 -15   0   5  -14.65   29.13
 -10  -4  10 1010.58  126.86
 -10   4  10 1053.99   68.45
 -10  -4  10 1051.39   80.08
 -10   4  10 1061.54  318.46
  -2   5  -8   15.29   29.82
   2  -5   8    6.48   22.17
   2   5   8   93.21   38.27
  -2  -5  -8   14.39   10.23
  -2  -5  -8    0.74    6.30
   1  -2  12 2570.06  219.95
  -1   2 -12 2365.07  145.95
   1   2  12 2411.31   98.23
   1   2  12 2352.33  117.90
  10   3   4  654.44  101.89
 -10  -3  -4  677.00   46.57
  10  -3   4  644.71  106.27
 -10  -3  -4  709.60   75.23
 -10   3  -4  719.28  210.80
  -4   6   7  391.02  159.10
  -4  -6   7  365.46  102.54
  -4  -6   7  336.03   87.59
  -4   6   7  348.53   93.35
   4  -6  -7  296.41   35.15
   1  -6   613825.58  366.83
  -1  -6  -613687.62  335.85
  -1   6  -615008.65  443.18
   1   6   613258.37  376.99
  -1  -6  -613133.41  327.66
   7   6  -5    9.43   21.73
  -7   6   5   43.67   30.90
  -7  -6   5   11.20   21.87
  -7  -6   5   -0.28   39.73
  -7   6   5  -15.47   35.27
   9   5  -8  247.11   61.23
  -9  -5   8  215.98   69.00
  -9   5   8  118.20   56.41
  -9   5   8  174.61   66.75
  -9  -5   8  233.53   73.17
  -2  -6   7   36.34   34.40
  -2   6   7   39.45   39.15
   2   6  -7   36.28   49.06
   2  -6  -7   39.83   24.89
 -11  -4   9   38.75   71.75
 -11   4   9   38.69   32.94
 -11   4   9   59.86   36.29
 -11  -4   9   22.55   12.97
  11   4  -9   24.67   12.55
 -15   0   7   -3.60   33.15
 -15   0   7    4.16   30.69
  -9   5  -1   30.49   34.68
   9  -5   1   36.22   44.00
  -9  -5  -1   38.37   24.85
  -6   5  -5  255.16  103.14
  -6  -5  -5  207.89   62.86
   6   5   5  182.92   55.59
  -6  -5  -5  175.28   36.99
   6  -5   5  184.52   63.19
   6   5   5  151.82   40.72
  -3   2 -11  817.61   61.46
  -3  -2 -11  832.80   45.61
   3  -2  11  898.77  255.29
   3   2  11  788.10   76.67
   3   2  11  787.71   70.99
 -12   4   7  111.03   45.01
  12   4  -7  103.79   42.32
 -12   4   7   95.14   21.49
 -12  -4   7  122.44   27.06
 -12  -4   7  154.96   70.38
  -7   4  -6 1893.02  103.97
  -7  -4  -6 2069.01  152.56
   7   4   6 1992.95   96.87
   7  -4   6 2246.20  172.47
   7   4   6 2118.26  108.73
   0   0  13   11.53   24.35
   0   0  13   -6.30   22.16
   0   0 -13   13.85   14.00
 -14  -1   1 6945.57  334.91
  14   1  -1 6946.18  274.64
  14   1  -1 7122.39  106.39
  14  -1  -1 6812.56  269.44
 -14   1   1 8124.65  249.55
   0   5  -9   69.54   46.25
   0  -5   9   72.18   25.47
   0  -5  -9   62.53   11.94
   0   5   9   49.76   44.68
   6   2   9  707.59  123.11
   6   2   9  549.01  124.71
  -6   2  -9  676.66  138.39
  -6  -2  -9  606.61   76.31
   6  -2   9  684.11  210.95
 -11   1  13  495.00  145.78
 -11  -1  13  468.45  143.47
 -11  -1  13  384.58  112.47
 -11   1  13  399.28  117.61
  12  -1   3 1298.92  121.08
  12   1   3 1154.94  140.50
 -12  -1  -3 1326.78   69.53
 -12   1  -3 1031.88  153.89
 -12  -1  -3 1349.64  115.49
  -8  -1  14   68.31   50.82
  -8   1  14   96.41   63.29
  -8  -1  14   67.23   56.93
  -8   1  14   82.34   36.16
   8  -1 -14   86.13   26.15
  -4   0 -11   15.25   25.49
   4   0  11   14.27   29.59
   4   0  11   -3.54   36.98
   4  -6   4 7297.92  217.61
  -4  -6  -4 7660.34  203.49
   4   6   4 6852.42  266.20
  -4  -6  -4 7276.65  208.80
   1   4 -11 1102.54   67.84
  -1   4  11 1043.44   74.34
  -1  -4  11 1100.47  170.04
  -2   1 -12  305.08   40.68
   2  -1  12  137.83   87.74
  -2  -1 -12  245.50   46.50
   2   1  12  152.31   61.13
   2   1  12  295.66   86.95
  -7  -5  -4   24.97   22.15
  -7  -5  -4    5.85   10.34
  -7   5  -4   12.93   35.15
   7  -5   4    5.26   57.29
   8   4   5  954.09  168.34
  -8  -4  -5 1025.84   42.13
  -8  -4  -5 1057.82   60.57
  -8   4  -5 1106.11  158.58
   8  -4   5 1033.57  170.55
   8   4   5  900.20   81.34
  -5   5  -6  432.13  131.14
  -5  -5  -6  386.39  110.01
   5   5   6  413.39   81.53
   5  -5   6  408.96   99.87
  -5  -5  -6  349.65   59.45
   5   5   6  399.99  106.70
 -14  -1  10  729.51  217.58
 -14   1  10  591.88   93.53
  -5   6  -3  134.79   81.18
   5  -6   3   92.46   45.39
  -5  -6  -3   70.40   41.44
  -5  -6  -3   83.07   24.64
   5  -3   9    9.29   48.64
  -5   3  -9   37.10   38.62
   5   3   9   48.98   27.52
  -5  -3  -9   58.75   18.76
   5   3   9   70.34   28.91
  -4   1  14 4398.87  193.28
  -4  -1  14 4356.47  188.11
  -4   1  14 4355.95  165.60
  -4   1  14 4763.02  194.76
  -8  -5   9  730.73   92.96
  -8  -5   9  803.44  239.72
   8  -5  -9  707.81   59.08
  -8   5   9  802.49  132.07
  -8   5   9  744.68  125.70
   6  -4   7  567.93  151.20
  -6  -4  -7  754.50   86.52
  -6   4  -7  784.13   64.24
   6   4   7  666.92  108.64
  -6  -4  -7  616.32   92.10
   6   4   7  658.57   99.21
  -9   0  1421596.41  539.70
  -9   0  1419247.85  472.46
   9   0   7    8.57   28.31
  -9   0  -7  -14.17   30.33
 -12   4   2   -2.50   51.48
  12  -4  -2    3.63   24.96
 -12  -4   2   42.13   36.08
  -7  -6   019515.94  456.58
   7  -6   020292.96  531.76
  -7   6   017806.55  461.81
  -7  -6   019053.94  542.26
 -15   1   6  235.21   55.91
 -15  -1   6  173.41   52.09
 -15   1   6  169.05   81.67
 -15  -1   6   79.64   46.56
 -10   5   1  202.15  103.63
 -10  -5   1  337.22  112.02
  10  -5  -1  163.60   81.87
 -12  -3  -1 6084.52  272.89
  12   3   1 6230.72  230.92
  12  -3   1 5547.94  232.63
  -5  -6   7  947.29  137.71
  -5   6   7 1032.43   81.44
  -5   6   7  979.94  163.85
  -5  -6   7  452.78  178.91
   5  -6  -7  818.15   79.82
   8   0   8   83.72   50.70
  -8   0  -8   15.16   15.93
  -4  -5  10   95.10   40.59
  -4  -5  10  114.44   52.59
  -4   5  10   63.85   49.35
   4  -5 -10  109.37   28.02
  -3   0  14 9250.10  261.33
  -3   0  14 9209.12  238.86
  -3   0  14 8975.38  229.76
   1   6  -7   88.42   56.53
  -1  -6   7  155.47   45.58
   1  -6  -7  125.44   34.11
   1  -6  -7   86.08   28.20
  -1   6   7  100.91   52.24
 -10   2  13    7.17   24.37
  10  -2 -13   24.92   27.20
 -10  -2  13   59.18   39.10
 -10  -2  13   84.22   49.22
 -10   2  13   24.02   34.73
  15   1  -5  106.88   51.23
 -15   1   5   78.31   41.76
 -15  -1   5  194.21   49.07
 -15   1   5   95.63   44.34
 -15  -1   5   44.64   48.48
  -5   5  10   -0.38   14.13
  -5  -5  10   37.80   23.86
  -5  -5  10    8.75   40.86
  -5   5  10   23.86   27.18
   5  -5 -10   11.68   15.00
   3  -6   5   40.58   34.24
  -3   6  -5   28.66   43.38
   3   6   5   -9.36   29.44
  -3  -6  -5   10.22   14.94
  -3  -6  -5   -2.33   28.29
  -3  -6  -5  -21.78   31.07
 -14  -2   2 9044.35  317.26
  14   2  -2 9304.49  234.61
  14  -2  -2 8487.71  235.44
 -10  -3  12   36.20   28.96
 -10  -3  12  105.97   35.73
  10  -3 -12   38.01   24.69
 -10   3  12   60.55   33.33
 -10   3  12   69.22   55.13
 -15   0   8   14.74   33.70
 -15   0   8   10.46   13.67
  10   5  -7 6696.03  310.84
 -10   5   7 7480.53  218.18
 -10   5   7 7486.82  298.88
 -15  -1   7 8670.50  246.17
 -15   1   7 7975.14  231.80
 -15  -1   7 7604.01  330.00
 -15   1   7 8553.73  263.77
  -6   3  13 2966.74  141.26
   6  -3 -13 3085.36  115.06
  -6  -3  13 3166.37  144.63
  -6  -3  13 3073.86  141.22
  10   0   6 4628.31  193.28
 -10   0  -6 5107.25  206.60
 -14   2   9   42.37   35.16
 -14  -2   9   -9.38   27.05
 -14   2   9   37.99   20.93
 -14  -2   9  -27.71   53.75
  -5   3  13 1674.04  157.43
  -5  -3  13 1799.77  112.55
  -5  -3  13 1768.41   96.79
  -5   3  13 1822.43   65.76
   6  -6   2   54.99   71.50
  -6  -6  -2    4.63   12.16
  -6  -6  -2   21.83   10.50
  -6   6  -2   67.18   44.14
  -6  -6  -2   41.47   23.91
   0   1 -13   12.61   14.31
   0   1  13    5.14   19.11
   0   1  13   24.72   15.14
   0   1  13   13.89   21.06
   0  -1  13   50.77   46.82
 -11  -2  -4 3946.87  163.84
  11   2   4 3734.11  152.99
  11  -2   4 3828.19  171.02
 -11  -2  -4 3869.52  166.14
 -11   2  -4 3916.76  166.73
   0   7   0   24.23   23.78
   0  -7   0   21.73   22.17
   9  -4 -11  789.55   73.68
  -9  -4  11  719.56   49.36
  -9  -4  11  875.88  123.45
  -9   4  11  750.67  140.61
  -9   4  11  816.23   76.78
   3  -5 -10   22.09   13.75
  -3   5  10   12.14   13.24
  -3  -5  10   27.90   30.89
  -3  -5  10   52.91   39.56
 -13  -3   9   39.25   26.48
 -13  -3   9   44.12   39.20
 -13   3   9   40.64   25.18
  13   3  -9   71.93   33.14
 -13   3   9   50.99   40.11
   9  -4   412910.50  361.14
   4  -1  11 8075.52  238.02
   4   1  11 8365.32  237.03
  -4   1 -11 8146.87  229.97
  -4  -1 -11 7924.88  217.38
   4   1  11 7993.88  233.09
   8   5   3 1301.86   41.03
  -8  -5  -3 1353.17   22.66
  -8  -5  -3 1034.12   59.30
  -8   5  -3  988.37  133.42
   8  -5   3 1206.26  332.92
  -4  -5  -7  181.82   50.66
   4   5   7  300.99   93.91
   4  -5   7  115.61   64.77
  -4  -5  -7  218.49   50.09
  -4  -5  -7  218.96   55.61
  -4   5  -7  271.27   89.90
   2  -3  11 6176.91  271.70
   2   3  11 5763.18  242.64
  -2   3 -11 5941.64  242.07
   6  -5 -10  263.38   45.67
  -6  -5  10  287.39   90.08
  -6  -5  10  294.74   60.06
  -6   5  10  320.69  121.81
  -6   5  10  257.18   62.65
   1  -7   0   40.05   21.57
  -1   7   0  -18.40   39.98
  -1  -7   0   49.73   41.81
  -1  -7   0   52.98   30.27
  -7  -3  13   25.53   32.61
  -7   3  13   48.06   29.25
  -7  -3  13   24.15   25.99
   7  -3 -13   31.89   21.60
   0  -7  -1 7127.20  115.44
   0  -7   1 8003.25  218.77
   0   7   1 7146.55  176.72
   0   7  -1 7242.35  208.09
 -13   0  12 7239.55  209.40
 -13   0  12 7189.46  122.67
  -1   7   1 5655.51  284.39
  -1  -7   1 5734.94  221.14
   1  -7  -1 5487.57  217.68
  -1   2  13 1925.43  139.21
  -1   2  13 1974.74   71.31
  -1  -2  13 2168.02  188.18
   1   2 -13 1869.92   93.27
  -9   1  14  350.33  111.07
  -9   1  14  227.26   59.90
   9  -1 -14   22.68   15.38
  -9  -1  14  342.16  161.14
  -9  -1  14  279.69   74.32
  13  -3  -1   75.54   37.97
 -13   3   1   31.84   49.95
 -13  -3   1   13.24   47.92
  13   3  -1   28.29   16.90
  -5  -4  -8 3451.14  142.31
  -5   4  -8 3594.37  164.59
  -5  -4  -8 3624.26  147.84
   5  -4   8 3739.78  278.65
   5   4   8 3300.99  186.31
   5   4   8 3377.06  143.93
   7   0   9   -6.07   36.60
  -7   0  -9   54.43   28.62
  -7  -6   6  893.45  125.88
  -7   6   6  939.73  112.25
  -7   6   6 1029.00   78.17
   7   6  -6  907.04   44.57
  -7  -6   6  749.65  103.71
   9  -1   7  140.20   59.77
  -9  -1  -7  114.18   69.03
  -9   1  -7  117.98   45.49
   9   1   7  154.45   59.54
  15  -1  -4  -10.09   43.00
 -15  -1   4   26.36   26.85
  15   1  -4   12.40   18.09
  15   1  -4   26.51   35.83
 -15   1   4    4.72   44.74
  11  -4   1  -20.38   48.58
 -11   4  -1   46.91   46.94
 -11  -4  -1   -3.95   36.83
  -8  -6   3  346.77   58.36
  -8  -6   3  350.92  114.79
  -8  -6   3  372.37   46.01
  -8   6   3  283.14  102.36
   8  -6  -3  457.51   95.71
  -4   3  13  351.41   73.70
  -4  -3  13  396.56  141.27
  -4  -3  13  432.05  109.05
 -12  -4   8 7692.42  199.21
 -12   4   8 7771.49  275.74
  12   4  -8 8230.23  229.46
 -12   4   8 7778.13  222.33
   8   1   8  339.09   91.66
  -8  -1  -8  322.85   97.17
  -8   1  -8  358.78   95.59
   8  -1   8  301.28  107.59
 -11   3  -3  -20.48   46.05
  11   3   3   28.30   21.18
  11  -3   3   24.31   37.34
 -11  -3  -3   31.77   15.44
 -11  -3  -3   10.09   21.69
 -12  -2  1220926.36  528.85
 -12   2  1222657.19  571.25
 -12  -2  1220436.17  521.24
 -12   2  1219485.44  484.30
  -3  -1  14 2463.79  166.64
  -3   1  14 2329.86   99.74
  -3   1  14 2385.08  120.92
  -3  -1  14 2202.88  119.99
  -3   1  14 1896.54   95.91
 -13   2  11  370.54  143.02
 -13  -2  11  403.61  101.31
 -13   2  11  461.23  155.38
 -13  -2  11  415.21  149.51
  -8  -6   4 1677.42   38.93
  -8  -6   4 1653.41  186.16
  -8  -6   4 1721.09   54.05
  -8   6   4 1541.43   80.77
 -15   0   3  -44.98   62.94
  15   0  -3    5.10   16.02
   1  -7   1 1056.07   73.08
  -1   7  -1 1087.29  117.31
  -1  -7  -1 1058.50   64.59
  -1  -7  -1 1087.74  114.16
  -6   6   7  217.55   51.62
  -6   6   7  163.51   74.37
  -6  -6   7  160.61   62.72
  -6  -6   7  144.01   86.45
  -5   2 -10 6950.18  269.38
   5   2  10 6041.65  231.20
   5   2  10 6821.59  295.72
   5  -2  10 8048.38  255.25
  -5  -2 -10 6992.84  258.66
  14   0   0 3433.81  150.45
 -14   0   0 3555.10  159.85
 -15  -1   8   80.19   57.27
 -15   1   8    8.63   28.36
 -15  -1   8   31.19   19.14
 -15   1   8   42.87   31.10
 -13   0  -2  446.93  124.99
  13   0   2  371.14   94.65
   2   4  10 8271.47  256.64
   2  -4  1010403.22  298.29
  -2   4 -10 8978.48  251.07
   0  -3  12   66.67   61.93
   0   3 -12   52.30   46.13
   0   3  12   73.67   38.37
   8  -6  -217199.85  486.39
   2  -7  -1  365.90  141.49
  -2  -7   1  581.76  157.90
  -2   7   1  557.57  119.55
  -2  -7   1  584.59  105.39
  10   1   6  743.46  115.58
 -10  -1  -6  788.27   55.94
 -10   1  -6  795.45  160.83
  10  -1   6  693.48  151.69
  -2  -6  -634874.42  169.09
  -2   6  -635390.99  403.67
   2  -6   635125.29  375.38
  -2  -6  -634907.89  179.71
  -2  -6  -632308.55  764.24
   2   6   633002.52  793.75
   0  -6  -7  251.51   69.34
   0   6  -7  378.20  145.34
   0  -6  -7  237.19   45.07
   0   6   7  220.33   81.12
   0  -6   7  274.20   53.51
  -5   4  12  723.90   92.54
  -5  -4  12  738.99   62.73
  -5  -4  12  797.67   95.22
   1   7  -2   41.71   24.44
   1  -7  -2  184.66   48.27
  -1  -7   2  141.96   51.64
  -1   7   2   48.72   56.33
  -2  -5  10   26.83   27.33
   2   5 -10    7.24   17.02
  -2   5  10   75.87   35.22
 -11   0  -5  -31.03   41.01
  11   0   5   48.28   45.72
  -2  -7   0   20.17   40.19
  -2  -7   0   -8.23   35.33
  -2   7   0   34.42   34.62
   2  -7   0   45.43   38.09
 -12   0  13   46.54   47.66
 -12   0  13   10.70   42.81
 -10   0  1416039.35  401.39
 -14   0  11   32.10   36.31
 -14   0  11   -8.19   39.23
 -13  -2  -1  198.09   65.38
 -13   2  -1  155.72   80.61
  13  -2   1  143.93   52.33
  13   2   1  112.97   29.28
  13   2   1  160.45   50.17
   6  -4 -12 8293.26  200.87
  -6  -4  12 8122.36  296.72
  -6  -4  12 7798.50  257.67
  -6   4  12 8011.15  231.54
   0  -7  -2  145.73   47.49
   0  -7   2  115.12   39.10
   0   7  -2   11.81   29.83
  -6  -2  14 4175.57  182.27
  -6   2  14 4560.83  170.60
  -6  -2  14 4630.95  198.30
  12  -4  -1   27.98   28.52
 -12   4   1   24.84   33.77
 -12  -4   1   11.40   36.40
  -8  -3  13 1316.30   68.17
  -8   3  13 1214.90  149.49
  -8   3  13 1501.35   78.60
  -8  -3  13 1267.07   77.75
   8  -3 -13 1386.91   56.67
  -1  -5  -9  261.99   28.74
  -1  -5  -9  276.54   37.02
  -1   5  -9  360.97  138.44
   1   5   9  338.15   81.34
   1  -5   9  370.76  120.24
  -2  -7   2  104.87   36.93
   2  -7  -2  149.44   46.84
  -2  -7   2   57.24   41.33
  -2   7   2   48.74   55.54
   4   3  10 1524.60   50.63
  -4   3 -10 1360.16   73.23
   4  -3  10 1613.41  128.62
  -4  -3 -10 1399.69   39.88
   4   3  10 1408.23   93.02
  -7  -6  -1   66.03   22.69
  -7  -6  -1   56.88   15.24
  -7   6  -1   71.92   50.40
  -7  -6  -1   28.53   12.95
 -15   0   9  -14.32   38.39
 -15   0   9  -51.74   54.44
 -13  -1  12  497.97  115.12
 -13  -1  12  522.63   86.56
 -13   1  12  465.48  157.67
 -13   1  12  424.27   60.20
  -4  -4  12   37.03   39.34
  -4  -4  12   14.80   38.69
   0   4 -11 1542.51  105.61
   0   4  11 1352.90  101.80
   0  -4  11 1321.15  145.20
   7  -1   9 1530.09   80.88
   7   1   9 1636.06   81.86
  -7   1  -9 1636.09   56.71
  -7  -1  -9 1583.80   55.57
  -7   5  10 1430.42   66.82
  -7   5  10 1341.22  156.23
  -7  -5  10 1342.52   79.70
  -7  -5  10 1027.79  240.13
   7  -5 -10 1287.29   89.92
  -7  -2  14  433.20  116.58
  -7   2  14  331.23   94.74
  -7   2  14  355.19   73.69
  -7  -2  14  342.35  129.50
   7  -2 -14  225.79   57.17
 -10  -5   0  228.83   55.90
 -10   5   0  154.84   68.91
  10  -5   0  325.63  115.56
 -14  -3   510662.57  265.92
  14   3  -511242.97  276.79
 -14   3   510896.39  300.77
 -14   3   510572.72  331.26
 -14  -3   510934.62  310.67
  -2   0  14 5103.29  204.64
  -2   0  14 5217.08  203.07
 -14  -3   6   86.49   76.36
 -14   3   6  100.55   55.54
  14   3  -6   68.41   35.64
 -14   3   6  230.50   76.68
 -14  -3   6  163.63   37.64
  -5   2  14 1889.94  188.55
  -5  -2  14 2916.03  133.20
  -5  -2  14 2333.97  129.59
  -8   6   5   53.88   51.05
  -8  -6   5   27.60   19.60
  -8  -6   5   67.99   28.34
   8   6  -5   28.73   28.88
  -8   6   5    6.01   19.79
  11  -5  -4  265.43  136.74
 -11  -5   4  418.32  118.37
 -11   5   4  312.82   98.28
  10   4   3   28.48   20.18
 -10  -4  -3   24.23   16.63
 -10   4  -3   44.04   28.39
  10  -4   3  120.94   71.60
 -10  -4  -3   88.72   15.96
  -3  -3  13 1715.57   84.75
  -3   3  13 1596.75  150.79
  -3  -3  13 1321.29  106.00
  -9   5   9  683.13   70.79
  -9   5   9  267.94  124.54
  -9  -5   9  578.54  117.15
  -9  -5   9  802.95  233.44
 -11   5   5 1368.74  104.67
  11   5  -5 1342.19   42.28
 -11   5   5 1059.42  153.77
 -11  -5   5 1080.45   84.95
  -9   5  -2   35.54   46.94
  -9  -5  -2   11.81   17.59
   9  -5   2   46.06   40.60
  -7  -4  12  536.38   59.88
   7  -4 -12  332.21   69.42
  -7   4  12  326.58   85.74
  -7  -4  12  507.91  171.77
  -7   4  12  459.22  165.66
   2  -7   1 1196.50   79.17
  -2  -7  -1 1059.05   40.98
  -2   7  -1 1098.54   86.92
  -2  -7  -1 1163.86   76.62
  -2  -7  -1 1107.50   63.70
   3  -5   8   58.10   28.28
  -3   5  -8   33.01   32.44
   3   5   8   60.14   33.61
  -3  -5  -8  112.83   25.72
  -3  -5  -8   67.95   17.06
  15   1  -314247.81  382.83
 -15  -1   316303.53  454.14
 -15   1   314689.45  409.85
  15   1  -313979.91  350.24
  15  -1  -314218.60  372.03
   6   0  1010642.86  300.77
  -6   0 -1010458.66  296.43
  -8  -6   1    8.16   50.01
   8  -6  -1  102.81   71.70
  -8   6   1   44.18   50.91
  14  -1   0   43.24   44.24
  14   1   0    5.99   28.87
  14   1   0   -0.94   23.29
 -14   1   0  -24.19   42.51
 -14  -1   0   22.87   35.33
 -11   4  10  874.80  128.04
 -11  -4  10  761.34   95.42
 -11   4  10  774.09  212.27
 -11  -4  10  808.46   80.07
  13   1   2  185.25   99.89
 -13  -1  -2  348.46  112.97
 -13   1  -2  215.29   89.26
  13  -1   2  166.66   62.62
  13   1   2  141.88   49.63
  -1   7  -2   70.18   63.84
  -1  -7  -2   39.10   20.07
   1  -7   2   51.03   34.11
  -1  -7  -2    2.78   20.07
 -10  -5   8   50.93   39.10
 -10   5   8  -12.85   38.32
 -10   5   8   58.24   28.07
  10   5  -8   27.63   26.26
  -3  -7   1 1935.74  107.74
  -3   7   1 1838.36  116.03
  -3  -7   1 2065.75   89.81
  -3  -7   1 2116.76  155.14
   3  -7  -1 1791.01  106.79
 -14  -3   4   32.35   32.64
  14  -3  -4   59.13   57.09
  14   3  -4   32.73   22.37
 -14   3   4   60.45   34.16
  14   2  -1   53.25   26.61
 -14   2   1   73.01   71.90
 -14  -2   1   51.57   44.94
  14   2  -1   39.74   27.74
  14  -2  -1   65.30   30.19
 -11   1  -5 1191.28   67.51
 -11  -1  -5  919.97   48.14
  11  -1   5  865.47   67.88
  11   1   5 1143.58   84.96
 -11   5   3   29.94   28.52
 -11  -5   3   37.50   34.99
  11  -5  -3   73.58   49.48
   4   4   9  125.60   55.01
  -4   4  -9  106.47   40.20
   4  -4   9   96.21   75.22
   4   4   9   67.55   16.40
  -4  -4  -9  133.01   33.86
  14   3  -711222.11  280.36
 -14  -3   710883.23  310.50
 -14   3   7 9635.44  315.65
 -14  -3   710761.29  272.49
 -12   1  13 2421.97  193.71
 -12  -1  13 2423.40  189.39
 -12  -1  13 2516.83  123.01
 -12   1  13 2430.19  128.81
 -10   1  14  505.52  188.68
 -10  -1  14  519.45  186.91
 -10   1  14  407.85   58.25
 -10  -1  14  381.66  148.37
   1   0  13   50.89   31.96
  -1   0 -13   17.10   18.88
   1   0  13    1.67   13.33
 -11  -2  13  388.01   89.84
 -11   2  13  384.03  105.13
 -11  -2  13  316.29   84.66
 -11   2  13  454.70   98.59
 -14   1  11   35.76   26.48
 -14   1  11   61.60   49.04
 -14  -1  11   58.28   35.56
 -14  -1  11   41.34   37.95
 -12   2  -3  618.26  188.91
 -12  -2  -3  660.70   80.65
  12  -2   3  751.48  118.37
  12   2   3  631.60  106.12
 -12  -2  -3  655.99   39.86
  -3   0 -12 6348.84  292.45
   3   0  12 6257.43  236.62
   3   0  12 6029.41  254.23
   3  -7  -2  189.17   56.58
  -3  -7   2  182.17   69.20
  -3   7   2  139.74   49.96
  -3  -7   2  183.96   63.49
   8  -2 -14 1426.14   64.97
  -8  -2  14 1520.57   79.83
  -8   2  14 1558.15  148.09
  -8  -2  14 1671.49  142.54
  -8   2  14 1725.16   95.38
  -3   6   8 1944.04  109.28
  -3  -6   8 1728.97  150.42
  -3   6   8 1946.83  184.06
   3  -6  -8 1271.68   58.44
  -3  -6   8 1712.84  138.76
   1   7  -3 5660.11  301.78
   1  -7  -3 5540.66  216.83
  -1  -7   3 5651.10  231.20
  -1   7   3 5361.99  237.01
   4  -6  -8 8715.38  218.32
  -4  -6   8 8260.93  223.71
  -4  -6   8 8477.74  302.97
  -4   6   8 8488.06  230.22
  -4   6   8 8362.92  292.74
  -2   2 -12 1771.00  107.67
   2   2  12 1908.18   78.49
   2   2  12 1804.96  215.48
   2  -2  12 2102.58  121.29
  -3   4  12 7232.96  240.79
  -3  -4  12 7871.72  269.41
  -3  -4  12 6634.95  274.51
 -14   2  10  -19.69   42.46
 -14  -2  10  -16.35   51.02
 -14   2  10   50.03   39.13
 -14  -2  10   20.84   36.11
  -2  -7   3 2958.30  128.38
  -2   7   3 2800.59  183.49
  -2  -7   3 2876.78  153.10
   2  -7  -3 2866.74  122.92
  -3  -7   0  360.61   86.61
  -3   7   0  430.88  110.12
   3  -7   0  413.25  129.20
  -3  -7   0  270.96   48.25
  -3  -7   0  380.76   64.33
  -4   2  14   47.56   17.25
  -4  -2  14   41.80   38.53
  -4  -2  14   63.33   35.61
  -4   2  14   11.25   35.48
  -4   2  14   30.06   17.98
 -15  -1   9  998.10   90.20
 -15   1   9  906.01   79.76
 -15   1   9  791.90  107.84
 -15  -1   9  511.12  151.69
   5  -6   4  554.57  145.51
  -5   6  -4 1148.53  165.06
  -5  -6  -4 1019.87  114.34
  -5  -6  -4 1026.36   36.72
   5   6   4 1066.81   39.27
 -11   5   6  497.02  106.90
  11   5  -6  535.83   73.99
 -11  -5   6  564.01  168.66
 -11  -5   6  506.30   64.15
 -11   5   6  568.43  169.43
 -11  -3  12   25.44   24.38
 -11   3  12   23.69   75.81
 -11  -3  12   26.18   48.20
 -11   3  12   18.71   29.99
   1   5 -10   72.16   28.79
  -1  -5  10  218.90   83.70
  -1   5  10  194.50   79.90
  10  -4 -11  324.63  125.83
 -10  -4  11  305.73   92.14
 -10   4  11  497.46  111.85
 -10  -4  11  470.30  101.96
 -10   4  11  538.06  183.47
  -2   1  14 1376.99   86.31
  -2  -1  14 1372.92  197.68
 -15  -2   618816.62  604.58
 -15   2   617842.58  458.09
  -7  -6   7  533.46  184.12
  -7  -6   7  504.12  101.02
  -7   6   7  619.49  207.52
   7   6  -7  537.36  111.21
  -7   6   7  569.45  137.08
  -8   3  -7 4387.57  201.03
   8   3   7 4513.17  218.69
   8   3   7 4950.62  213.16
  -8  -3  -7 4643.58  185.61
  -8  -3  -7 4331.79  195.94
   0   7  -3 3970.52  253.15
   0  -7   3 3750.39  166.41
   0  -7  -3 3545.74  196.79
   0  -7  -3 3690.98  171.65
 -13  -3  10   49.06   31.46
 -13   3  10    9.53   28.87
 -13  -3  10   36.40   35.08
 -13   3  10    9.09   37.00
  -4   6  -5  152.85   60.99
   4  -6   5   78.21   44.77
  -4  -6  -5   15.17   16.38
   4   6   5   34.69   28.05
  -4  -6  -5   61.87   22.93
  -4  -6  -5   17.81   19.29
   2   6  -8   16.66   30.83
   2  -6  -8   -1.44   10.44
   2  -6  -8   -0.63    8.58
  -2   6   8   22.42   34.27
  -2  -6   8  -10.11   36.25
  15   0  -2 9861.84  262.45
 -15   0   210807.85  328.57
 -13  -4   5    5.75    6.75
 -13   4   5   30.66   22.71
 -13  -4   5  -49.28   49.74
 -13   4   5  -44.59   50.53
  13   4  -5    5.65    7.30
  -9   3  13 7967.90  211.33
  -9   3  13 7445.12  314.68
  -9  -3  13 7064.42  290.84
   9  -3 -13 8065.07  205.16
  -9  -3  13 7607.46  248.95
 -15   2   5  276.19  110.60
 -15  -2   5  259.35   61.18
 -15  -2   5  119.47   69.96
 -15   2   5  332.47   72.43
  15   2  -5  183.94   67.04
  -5  -6   813600.97  372.61
  -5  -6   812881.23  325.90
  -5   6   813191.99  352.18
   5  -6  -813363.27  330.49
  -5   6   813046.19  328.01
  -6  -6  -3  202.15   52.58
  -6   6  -3  315.03   78.34
  -6  -6  -3  175.28   64.52
   6  -6   3  228.96   67.01
  -6  -6  -3  184.52   37.99
 -12  -4   9   39.02   33.26
  12   4  -9   34.31   26.31
 -12   4   9   94.24   66.54
 -12  -4   9   37.88   23.26
 -12   4   9   25.83   32.29
   1  -6   7  115.89   60.13
  -1  -6  -7   19.67   14.61
  -1  -6  -7   12.46   10.61
  -1   6  -7  -17.81   60.55
   1   6   7  103.83   57.11
  -9  -3  -6  166.47   42.61
   9   3   6   72.30   43.87
  -9   3  -6  141.56   51.98
  -9  -3  -6  101.52   27.81
   9  -3   6   44.76   30.97
 -12   0  -4 4682.61  235.26
  12   0   4 4070.26  169.30
  -6   1 -10  346.07   33.66
  -6  -1 -10  325.21   88.96
   6  -1  10  322.28   76.91
   6   1  10  287.85   94.21
   6   1  10  162.63   68.95
 -15   2   7   14.44   38.01
 -15  -2   7  -93.85   79.62
  15   2  -7    2.65   23.71
 -15   2   7   31.31   31.72
 -15  -2   7    3.14   17.67
  -3   7   3 3694.76  162.97
  -3  -7   3 3690.08  150.20
   3  -7  -3 3960.57  164.57
  -3  -7   3 3771.29  232.97
  -8   6   6 3014.40  228.86
  -8  -6   6 2993.46  124.85
  -8   6   6 2789.55  147.95
   8   6  -6 2960.37  121.21
  -8  -6   6 3302.18  178.87
  -8  -4  12 3862.96  200.90
  -8  -4  12 3431.60  180.63
   8  -4 -12 3658.09  142.09
  -8   4  12 3925.23  245.15
  -8   4  12 3606.32  145.33
 -13  -4   6 1948.88  225.39
 -13   4   6 1737.35  203.90
 -13   4   6 1999.01  229.58
 -13  -4   6 1781.01   84.13
  13   4  -6 1802.49   84.46
  13  -3   0   57.10   28.75
  13   3   0    2.81    9.36
 -13   3   0   58.18   31.25
  13   3   0   -3.64    8.64
 -13  -3   0  101.45   52.86
   0   2  13 1069.48   44.18
   0  -2  13 1070.30   87.90
   0   2 -13 1226.99   64.00
   0   2  13 1174.13   42.28
   0   2  13 1271.69  161.71
  -8  -5  10  294.29   82.30
  -8   5  10  187.70   46.84
   8  -5 -10  157.80   63.08
  -8   5  10  161.51   61.44
  -8  -5  10  217.36   65.58
 -13   4   4   -9.75   49.25
 -13  -4   4   18.40   30.13
  13  -4  -4   -5.37   49.27
   7   3   8   14.24   17.04
  -7   3  -8   17.94   24.42
   7  -3   8   67.73   36.04
   7   3   8   49.48   36.74
  -7  -3  -8   59.96   42.69
 -11   5   2   41.94   69.95
 -11  -5   2   26.65   25.92
  11  -5  -2   64.32   76.23
 -12  -3  -2   19.22   18.95
 -12   3  -2   13.13   40.18
  12  -3   2   53.91   30.13
  12   3   2    4.71   14.03
  12   3   2   -5.31   12.16
   2  -7   2   -2.80   43.57
  -2  -7  -2   27.20   15.84
  -2  -7  -2   80.79   27.89
  -2   7  -2  -30.91   45.33
  -2  -7  -2   85.76   36.01
 -14   3   3 4310.58  167.78
  14   3  -3 4756.35  138.97
  14  -3  -3 4395.03  238.06
   1  -1  13  741.19   94.76
   1   1  13  827.13  132.46
  -1   1 -13  795.88   57.32
   3   1  12  572.76   73.40
  -3  -1 -12  521.63   46.18
   3  -1  12  283.51   86.88
   3   1  12  543.34   87.05
  -3   1 -12  647.73   43.94
  -4  -2 -11  415.22   46.78
  -4   2 -11  431.74   39.53
   4   2  11  441.28   79.39
   4   2  11  539.48  149.33
   4  -2  11  603.43  159.26
 -14   3   8  108.09   49.55
  14   3  -8  124.97   40.20
 -14   3   8  109.66   43.61
 -14  -3   8   79.55   50.15
 -14  -3   8  156.20   45.25
  -2   3  13 2003.46  198.13
  -2  -3  13 1880.43  121.71
  -3   7  -1 8356.89  337.06
  -3  -7  -1 8096.20  236.90
  -3  -7  -1 7728.39  239.16
   3  -7   1 7941.95  267.12
  -3  -7  -1 7633.48  230.71
  -8  -6   0 3074.39  138.90
   8  -6   0 2998.44  169.45
  -8   6   0 2276.72  219.27
   7   5   5  345.16  104.56
  -7  -5  -5  355.85   48.78
  -7   5  -5  420.18  138.02
  -7  -5  -5  331.25  119.53
   7   5   5  412.68   81.35
   7  -5   5  174.05  108.50
 -11   0  14 6677.59  226.74
 -11   0  14 5022.58  175.54
  -6   5  -6   37.01   34.50
  -6  -5  -6   30.03   16.89
   6  -5   6   28.82   48.51
  -6  -5  -6   -4.52   12.78
   6   5   6   14.96   20.58
   6   5   6   22.65   17.65
  -9  -2  14 6213.43  210.94
  -9  -2  14 6055.82  199.17
  -9   2  14 6048.17  210.11
   9  -2 -14 6550.09  194.46
  -9   2  14 6399.64  267.07
 -15   0  1010568.67  373.80
 -15   0  1010949.61  386.71
   9  -2   7  775.58   82.28
  -9  -2  -7  680.26   44.81
  -9   2  -7  805.26   74.20
   9   2   7  677.48  118.51
  15   2  -4  166.10   46.52
 -15   2   4  249.19  104.61
  15   2  -4  200.99   57.01
  15  -2  -4  188.34   59.18
 -15  -2   4  118.77   79.97
  -4   7   2   63.06   38.28
  -4  -7   2   44.45   23.83
  -4  -7   2   46.98   30.97
  -4  -7   2   51.83   22.12
   4  -7  -2  122.70   62.49
  -4  -7   1  784.47  119.65
  -4  -7   1  685.89   42.58
   4  -7  -1  595.98  176.15
  -4   7   1  599.74  154.65
  -4  -7   1  522.21   83.02
  -1  -7  -3 1393.31   66.36
   1  -7   3 1432.49   88.72
  -1  -7  -3 1354.16  112.03
  -1   7  -3 1271.01  181.84
   3   6   628121.73  211.27
  -3  -6  -625731.08  707.33
  -3  -6  -628749.86  161.39
  -3   6  -627399.92  794.90
  10   3   5  600.06  105.57
 -10  -3  -5  621.46   55.47
 -10  -3  -5  622.49   54.82
  10  -3   5  567.70  213.84
 -10   3  -5  431.39   85.58
   8   2   8 3665.90  179.44
  -8  -2  -8 3789.82  143.91
  -8   2  -8 3869.70  235.10
   8  -2   8 4022.14  165.85
  -2  -4  1216878.44  492.77
   2   4 -1215165.51  480.19
  -2   4  1215595.11  457.34
 -12  -4   0 2717.32  132.06
 -12   4   0 2736.20  135.92
  12  -4   0 3213.37  265.89
  -3  -2  14   66.34   38.70
  -3   2  14   33.11   13.27
  -3   2  14   51.16   13.98
  -3  -2  14   72.33   90.81
  -3   2  14   56.42   48.31
  11   5  -720576.39  573.75
 -11  -5   718152.42  523.41
 -11   5   721394.95  611.01
 -11   5   721992.84  640.24
 -11  -5   721713.82  598.30
  -1   6   8  105.58   80.10
   1  -6  -8  118.28   24.46
  -1  -6   8  166.43   63.02
   1   6  -8  192.37   84.35
   1  -6  -8  135.28   37.51
 -15  -1   2   33.89   34.27
  15   1  -2   49.67   43.08
  15  -1  -2   44.47   27.97
 -15   1   2  -49.43   53.99
  15   1  -2   28.13   34.42
  -7  -6  -2   34.70   13.80
   7  -6   2   19.34   29.68
  -7  -6  -2   50.22   33.88
  -7   6  -2   11.53   20.93
  -7  -6  -2   20.29    8.00
   6  -6  -810971.36  312.71
  -6  -6   811309.65  421.77
  -6   6   810758.96  353.21
  -6   6   810266.67  302.03
  -6  -6   810889.79  317.00
 -13   4   7   59.13   30.69
 -13  -4   7  115.75   52.43
 -13  -4   7   15.94   22.61
  13   4  -7   15.67   24.61
 -13   4   7  125.71   62.60
 -12   1  -4 3081.19  131.59
  12  -1   4 3220.27  145.91
  12   1   4 3229.23  159.65
 -12  -1  -4 3788.89  155.03
  11  -4   2  -50.51   48.13
 -11   4  -2   36.60   30.50
 -11  -4  -2   -8.21   35.61
   1   3  12   89.83   42.39
  -1   3 -12  183.77   48.38
   1  -3  12   65.14   96.03
  -1   0  14  994.82  146.43
  -1   0  14 1076.61  114.82
  -1   0  14 1060.08   74.94
 -15  -2   8 9215.06  289.41
 -15  -2   8 9664.15  283.45
 -15   2   8 9468.18  331.98
 -15   2   8 9075.35  284.39
  -2   7   4  696.53  159.97
  -2   7   4  735.90   71.78
  -2  -7   4  605.36   66.36
  -2  -7   4  490.54  153.96
  -5   0 -11   17.22   14.59
   5   0  11   -3.28   37.46
 -13  -4   3    1.20   37.85
 -13   4   3   53.34   41.99
  13  -4  -3  112.47   57.64
  -8  -5  -4   -2.03   22.83
  -8   5  -4   33.47   52.29
   8  -5   4  110.81   64.82
  -8  -5  -4    3.72    6.64
   8   5   4    4.19    9.87
 -10   2  -6   42.28   50.52
 -10  -2  -6   92.81   27.55
 -10  -2  -6   47.46   40.80
  10  -2   6   95.00   59.52
  10   2   6   59.70   38.24
  10  -5   1  883.05  208.51
 -10   5  -1  855.72  178.99
 -10  -5  -1  712.90  108.98
  -3  -3 -11   24.87   10.30
   3   3  11   -6.87   41.05
   3  -3  11    5.34   39.78
  -3   3 -11   32.75   23.41
   3   3  11   20.59   11.73
  -1  -7   4  427.01  130.38
   1   7  -4  299.85   65.83
  -1   7   4  431.14  133.84
  -4  -7   3 3070.66  214.61
  -4   7   3 3049.99  176.14
   4  -7  -3 3031.08  132.32
  -4  -7   3 3044.91  134.52
  -4  -7   3 3306.66  141.42
   2   5   9 1334.23  123.37
   2  -5   9 1354.89  151.36
  -2   5  -9 1533.50  205.36
  -2  -5  -9 1304.12   55.67
  -2  -5  -9 1264.11   54.13
   5   5   7   22.78   24.27
   5   5   7   15.26   29.68
   5  -5   7  103.08   70.79
  -5  -5  -7   40.40   24.44
  -5   5  -7   84.76   47.53
  -5  -5  -7   41.01   23.86
   1   4  11 1234.04  199.60
   1  -4  11 1316.40  112.51
  -1   4 -11 1298.64  154.53
   6   3   9  172.81   48.87
   6  -3   9   61.21   70.23
  -6   3  -9  193.46   75.87
  -6  -3  -9  152.79   35.13
   6   3   9  113.50   60.62
  -4  -7   0    0.97    8.67
   4  -7   0  -12.75   45.68
  -4   7   0   24.07   32.12
  -4  -7   0   38.97   28.57
  -4  -7   0   19.67   30.52
  -7   0  15    8.71   26.14
  -7   0  15   -2.35   28.62
  -7   0  15   24.76   38.37
  -8   4  -6  239.49   61.50
   8   4   6  192.73   69.23
   8   4   6  101.62   51.35
  -8  -4  -6  189.03   48.01
  -8  -4  -6  116.09   85.25
   8  -4   6  172.70   37.73
  -6   0  15    6.42   30.05
  -6   0  15   27.77   33.67
  -6   0  15   -1.10   18.98
  -9  -6   4  166.71   65.59
  -9  -6   4   78.34   20.91
   9  -6  -4   96.66   40.13
  -9   6   4  131.63   41.86
  -9  -6   4  105.79   40.01
 -14   0  -1   36.33   28.61
  14   0   1   -3.29   35.43
   9  -6  -3  536.61  126.05
  -9  -6   3  419.17   23.91
  -9   6   3  465.61  130.63
  -9  -6   3  408.41  137.67
   7   4   7  896.19   87.26
  -7   4  -7  910.31  169.28
  -7  -4  -7  870.70  109.07
  -7  -4  -7  875.26  113.35
   7  -4   7  882.58  246.54
   7   4   7  823.13  122.84
  -3  -7   4  157.69   36.47
  -3   7   4  110.25   52.97
  -3  -7   4   67.88   30.66
  -3   7   4  135.03   52.12
  -3   4 -10 1706.19  102.11
   3  -4  10 1545.85  143.08
  -3  -4 -10 1513.06   50.86
   3   4  10 1499.69  160.31
 -13   2  1219477.37  559.66
 -13  -2  1219926.38  562.63
 -13   2  1221532.53  638.41
 -13  -2  1221873.28  622.21
 -11  -1  14  644.36   84.35
 -11  -1  14  723.36   60.47
 -11   1  14  672.47   67.05
 -11   1  14  585.67   53.79
   7  -2   9  507.30  150.62
   7   2   9  544.36   89.64
   7   2   9  531.62  134.26
  -7  -2  -9  517.91   45.81
  -7   2  -9  517.57   92.08
 -15   1  10  194.88   89.06
 -15  -1  10  396.99   99.55
 -15  -1  10  479.61  101.70
 -15   1  10  396.66  123.47
   0   5  10  270.55   83.90
   0   5 -10  303.29   99.29
   0  -5  10  357.07   83.19
  10   5  -9 2441.75  117.90
 -10  -5   9 2257.93  117.91
 -10  -5   9 2663.44  130.51
 -10   5   9 2555.48  126.52
 -10   5   9 2512.88  149.99
 -14   0  12 1705.80  167.08
 -14   0  12 1744.02  166.93
 -13   0  13   -0.38   50.53
 -13   0  13  -71.37   39.95
  -5  -5  11 2158.40  106.64
  -5   5  11 2160.09  187.49
  -5  -5  11 2467.05  116.06
   5  -5 -11 2387.04   82.19
   0   7   4  732.24  100.49
   0  -7  -4  852.57   78.40
   0   7  -4  886.00  243.82
   0  -7   4  870.55   72.64
  -9   4  12 3210.93  196.83
  -9   4  12 3031.07  225.14
  -9  -4  12 2909.11  138.17
  -9  -4  12 2312.01  188.18
   9  -4 -12 3170.56  124.46
  -8   0  15  -15.13   34.16
  -8   0  15  -21.21   48.94
 -11   5   1 1013.93  143.24
  11  -5  -1  974.20  284.32
 -11  -5   1  936.98  123.84
  -5   0  15   12.45   40.71
  -5   0  15    3.97   16.77
  -5   0  15   12.31   28.38
  -9  -4  -5  631.80   51.23
   9   4   5  647.07  113.22
   9  -4   5  620.57  177.36
  -9  -4  -5  644.69   41.68
  -9   4  -5  687.34  175.98
  10  -3 -13 3492.16  124.75
 -10  -3  13 3716.07  151.92
 -10   3  13 3557.61  184.35
 -10   3  13 3305.99  192.36
 -10  -3  13 3579.14  156.64
  -4  -5  11  136.97   46.97
  -4  -5  11   71.04   52.46
   4  -5 -11   15.09    8.22
   4  -5 -11   26.49   13.77
  -9  -6   5  790.97  243.29
  -9   6   5  754.00   93.09
  -9  -6   5  704.70   64.77
   9   6  -5  753.58   52.49
  -9   6   5  734.46  114.53
  14   3  -2  249.60   59.21
 -14  -3   2  232.81  104.18
 -14   3   2  184.28   71.69
  14  -3  -2  287.85   89.71
  -9  -6   2 6354.49  256.03
  -9   6   2 6669.29  305.50
   9  -6  -2 6442.95  252.45
  -3  -7  -2  267.44   85.64
  -3  -7  -2  308.46   93.77
  -3   7  -2  208.34   86.18
   3  -7   2  417.12  115.66
  -3  -7  -2  413.97  108.66
  15  -2  -3   -1.73   29.08
  15   2  -3  -11.14   19.01
  15   2  -3    9.97   42.28
 -15  -2   3   29.99   29.92
 -15   2   3   76.64   62.76
  -1  -1  14  869.33  226.89
  -1   1  14  801.76   91.68
  -1   1  14  929.95   62.83
  -1   1  14  941.29   48.12
 -14   2   0  149.32   66.51
 -14  -2   0  225.04   54.89
  14   2   0  179.45   60.41
  14   2   0  165.29   54.13
  14  -2   0  192.81   60.17
  -8   6   7  131.80   46.91
  -8  -6   7  118.19   52.38
   8   6  -7   61.32   34.28
  -8   6   7  128.19   76.39
  -8  -6   7   62.14   32.80
  13  -2   2 3153.49  141.26
 -13  -2  -2 3083.21  221.76
  13   2   2 3214.84  165.75
 -13   2  -2 3111.70  212.78
  13   2   2 3072.26  116.49
  -5  -1 -1124749.98  694.18
   5   1  1124517.08  698.28
   5   1  1127108.40  751.47
   5  -1  1128858.90  447.62
  -5   1 -1125645.15  724.20
   6  -5 -11 3569.47  136.00
  -6  -5  11 3150.17  150.22
  -6   5  11 3648.16  152.98
  -6  -5  11 3005.89  126.24
  -2  -7  -3   78.90   27.87
  -2  -7  -3  203.52   54.78
  -2   7  -3   86.85   39.48
   2  -7   3  163.77   66.57
  -2  -7  -3  103.83   52.95
   6  -4   8 1182.26  312.55
  -6   4  -8  820.24   79.20
  -6  -4  -8 1170.44   74.67
   6   4   8 1132.84   90.96
   6   4   8 1053.66   75.36
  -6  -4  -8 1202.97   83.81
 -14   3   9  708.40  147.25
 -14  -3   9  623.55   86.35
  14   3  -9  541.05  142.13
 -14   3   9  676.76  194.49
 -14  -3   9  646.39   87.75
 -11   2  -5 2382.12  113.88
  11   2   5 2146.83  137.12
 -11  -2  -5 2304.19   97.30
 -11  -2  -5 2334.87   99.69
  11  -2   5 2368.43  258.05
  11  -3   4  576.73  186.96
  11   3   4  946.25  102.80
 -11  -3  -4 1000.07  171.80
 -11   3  -4  938.73  160.48
 -11  -3  -4  944.41   33.90
   2  -6   7   67.50   58.01
  -2  -6  -7    6.52   10.69
  -2  -6  -7   -5.79   14.66
   2   6   7  102.44   61.94
  -2   6  -7  -20.31   57.95
 -16   0   6  435.53   93.85
 -16   0   6  290.17  173.48
 -12  -2  13  189.18   87.72
 -12   2  13  132.18   76.47
 -12   2  13  191.52  105.48
 -12  -2  13  129.20   53.91
  -9   5  10   65.36   52.42
   9  -5 -10  106.03   41.90
  -9  -5  10   53.97   55.27
  -9   5  10  104.83   54.39
  -9  -5  10   19.52   24.49
 -10  -2  14 5368.48  195.47
 -10   2  14 5241.93  170.59
 -10   2  14 5271.47  243.00
 -10  -2  14 5272.69  192.45
  10  -2 -14 5547.72  192.48
  -4  -7   4   23.57   31.71
  -4  -7   4   39.87   29.84
  -4   7   4   50.40   39.16
  -7   1  15   87.23   79.19
  -7   1  15   93.85   50.35
  -7  -1  15   76.04   86.58
  -7  -1  15   45.45   23.78
  -7   1  15   53.30   43.23
 -14  -2  11  344.01  109.27
 -14   2  11  306.67   89.23
 -14   2  11  362.94  144.49
 -14  -2  11  272.65  176.03
  -6   1  15  167.94   66.09
  -6  -1  15  134.21   74.06
  -6   1  15   90.01   96.50
  -6  -1  15   80.61   64.07
  -6   1  15  128.35   33.05
   9  -5   3 7550.15  287.57
  -9   5  -3 7500.60  344.43
  -9  -5  -3 7507.22  230.43
 -13   0  -3    5.15   19.44
  13   0   3  -13.85   37.93
 -13   4   8  470.58  130.08
  13   4  -8  471.26  124.05
 -13  -4   8  656.53  220.38
 -13  -4   8  478.58   66.90
 -13   4   8  555.76  116.55
  15   0  -1  -23.80   35.29
 -15   0   1   10.03   32.42
   0  -6   8   26.31   49.71
   0  -6  -8   37.07   15.22
   0  -6  -8   55.77   24.31
   0   6  -8  -11.46   53.40
   0   6   8   71.99   31.25
  14  -1   1   46.11   38.75
 -14   1  -1   42.22   24.02
  14   1   1   19.05   21.46
 -14  -1  -1  -43.71   40.18
  14   1   1   -4.35   33.56
 -16   0   7  -16.55   60.37
 -16   0   7   -1.53   27.88
  -7   6   8 6546.42  208.05
  -7  -6   8 6638.25  222.41
  -7   6   8 6934.50  276.40
  -7  -6   8 6383.81  234.86
  -4  -7  -1 4787.36  151.19
  -4  -7  -1 4720.09  143.94
  -4  -7  -1 4532.09  251.83
   4  -7   1 4362.01  168.23
  -4   7  -1 4987.10  181.68
  -5  -7   2   -5.84   14.61
  -5  -7   2   28.23   47.90
  -5   7   2  -15.20   40.08
   5  -7  -2   22.69   43.55
  -5  -7   2   19.52    9.65
   4  -5   8   66.85   55.23
  -4  -5  -8   23.89    9.50
  -4   5  -8   23.34   12.34
  -4  -5  -8   11.14   28.05
   4   5   8   13.40   22.28
  -4  -5  -8   17.06   10.62
 -15  -2   9  -21.85   55.06
 -15   2   9   65.74   40.48
 -15   2   9   32.36   20.74
 -15  -2   9   -9.35   27.99
  -8  -6  -1   98.21   40.53
  -8   6  -1   60.77   29.23
   8  -6   1  158.84   31.51
  13  -4  -2 4887.99  182.30
 -13   4   2 4801.30  180.34
 -13  -4   2 5047.18  269.18
 -11  -4  11  174.76   42.12
 -11  -4  11  247.22   71.56
 -11   4  11  280.67  114.53
 -11   4  11  268.34   64.99
  -3   5  11 7684.71  250.01
  -3  -5  11 7825.95  251.66
  -3  -5  11 8344.56  283.68
  -1  -3  13  -21.17   48.33
  -1   3  13   91.76   50.28
   1   3 -13   21.61   29.33
 -12   4  10  885.75  119.01
 -12  -4  10  894.50  117.82
 -12   4  10  862.88  145.82
 -12  -4  10 1008.01  121.22
  -2  -2  14   48.74   36.81
  -2  -2  14   18.11   30.11
  -2   2  14  -10.38   42.32
  -2   2  14   20.08    6.95
 -16   0   5   20.91   24.71
 -11   5   8   30.58   63.28
 -11  -5   8    4.88   51.54
 -11   5   8  -15.55   50.72
  11   5  -8   21.82   24.06
 -11  -5   8   -2.07   18.54
  -1   4  12 8328.35  262.43
  -1  -4  12 8103.77  282.42
   1   4 -12 8734.22  278.23
 -14  -1  12  365.17  131.38
 -14   1  12  464.63  163.71
 -14  -1  12  506.46  156.72
 -14   1  12  470.97  158.45
 -13   1  13 4721.49  216.60
 -13  -1  13 4788.89  188.97
 -13  -1  13 4710.30  203.97
 -13   1  13 5273.26  180.98
  -5  -7   1 1524.77   97.82
   5  -7  -1 1471.51  167.07
  -5  -7   1 1554.08   70.14
  -5  -7   1 1514.68   62.41
  -5   7   1 1690.88  113.22
  -8   1  15   32.24   25.01
  -8  -1  15   15.06   35.10
  -8  -1  15   35.32   32.19
  -8   1  15   55.55   35.95
  -9   0  15  -16.15   39.97
  -9   0  15  -21.87   46.21
  -5   7   3 1237.94  158.51
   5  -7  -3  978.00  186.89
  -5  -7   3 1157.25   97.16
  -5  -7   3 1110.50   57.99
  -5  -7   3 1091.98  153.91
 -12  -3  12   80.98   31.29
 -12   3  12   44.14   52.07
 -12  -3  12   35.86   30.07
 -12   3  12  -17.78   45.03
  -5  -1  15   47.73   45.29
  -5   1  15  167.64   54.67
  -5   1  15   62.80   32.73
  -5   1  15  113.93   32.98
  -5  -1  15   89.34   54.61
  -4   0  15    7.96   51.82
  -4   0  15   23.82   18.52
  -4   0  15    2.96   17.63
  -9   0  -8  688.60  132.85
   9   0   8  711.44  204.64
 -13  -3  1113666.20  409.47
 -13  -3  1113523.04  402.31
 -13   3  1112891.48  381.16
 -13   3  1113634.51  479.12
  -1   7  -4  459.92  127.01
  -1  -7  -4  392.33   96.19
   1  -7   4  445.39  104.69
   1   7   4  460.83  106.19
  -2   0 -13   -3.52   21.94
   2   0  13   60.63   37.18
   2   0  13    7.43   25.86
   7  -5 -11   68.65   26.82
  -7  -5  11  110.16   28.03
  -7   5  11  208.53   86.57
  -7   5  11  160.81   44.27
  -7  -5  11   90.49   57.16
   5   3  10   15.29   20.60
   5   3  10   88.67   42.02
  -5   3 -10   66.29   16.21
  -5  -3 -10   80.85   25.81
   5  -3  10  128.78   52.43
 -10   0  -7   -2.68   29.75
  10   0   7   -0.99   46.55
   6   2  10 5086.72  163.96
   6   2  10 4359.47  177.93
   6  -2  10 4569.11  305.68
  -6  -2 -10 4475.66  141.53
  -6   2 -10 4194.03  199.20
 -10   4  -414867.38  473.44
 -10  -4  -415052.90  414.48
  10  -4   414481.00  521.81
 -10  -4  -415170.95  503.51
  -9   6   6 1589.95  101.29
  -9  -6   6 1540.36   94.14
  -9  -6   6 1580.22   70.25
   9   6  -6 1634.77  108.29
  -9   6   6 1528.48  112.05
  -9   6   1   17.48   27.94
  -9  -6   1   48.72   50.39
   9  -6  -1   54.96   32.21
 -16   0   8   89.01   42.03
 -16   0   8   55.74   45.44
  -2  -7   5  222.82   75.62
  -2  -7   5  110.96   46.66
  -2   7   5  198.98   59.07
  -2   7   5  251.54   88.90
  -5  -6  -5   61.76   28.44
  -5  -6  -5   53.59   13.67
  -5   6  -5   93.27   62.39
  -5  -6  -5   93.16   43.02
   5   6   5   61.97   34.29
   6  -6   4   15.03   48.98
  -6  -6  -4   25.78   19.21
   6   6   4   29.88   19.85
  -6  -6  -4   29.13   25.05
  -6   6  -4   66.64   71.18
 -15   0  11   27.90   17.75
 -15   0  11    7.64   37.95
 -16   1   6   31.21   34.28
 -16  -1   6   42.29   21.41
 -16   1   6    7.93   42.48
 -16  -1   6   44.31   70.13
 -12   0  14  979.51  190.45
 -12   0  14  844.92  120.46
  -3  -7   5 2060.40   90.66
  -3   7   5 2146.53  166.57
  -3   7   5 2158.06  226.35
  -3  -7   5 2035.29  109.42
   1   2  13  679.30   39.16
   1  -2  13  709.01  212.60
   1   2  13  747.10  170.74
  -1   2 -13  669.67   57.61
   1   2  13  628.95   61.30
  13   3   1 5305.17  166.87
  13  -3   1 4920.34  265.51
 -13  -3  -1 5112.94  179.97
 -13   3  -1 4865.88  176.07
  -4  -6   9   66.93   35.55
  -4   6   9   39.12   40.27
  -4  -6   9   19.69   46.70
   4  -6  -9   11.09   15.88
  -4   6   9   10.34   10.63
   3  -2  12    2.21   50.54
   3   2  12   10.96   15.57
  -3  -2 -12   16.65   14.18
   3   2  12   32.63   43.71
  -3   2 -12   39.59   31.07
  13  -1   3    6.93   49.59
  13   1   3   43.63   31.61
 -13  -1  -3   15.19   22.87
 -13   1  -3   39.94   28.92
 -15   1   1  975.45  105.56
 -15  -1   1 1036.15  114.61
  15   1  -1  866.17   82.28
  15   1  -1 1021.47  166.66
  15  -1  -1  945.07  192.51
  -8   0  -9   -3.74   22.22
   8   0   9   -7.21   33.83
 -16  -1   7 5896.96  190.85
 -16   1   7 5221.03  232.52
 -16  -1   7 5086.18  196.81
 -16   1   7 5147.52  259.67
  -6   3  14  365.25   35.96
  -6  -3  14  374.58  160.31
  -6   3  14  342.49  101.86
  -6  -3  14  421.58  116.92
   1  -7  -5 3939.39   87.67
  -1   7   5 4162.46  170.75
   1   7  -5 3878.98  216.80
  -1  -7   5 4101.11  139.67
   5   4   9  185.13   45.60
   5  -4   9  205.68   73.04
  -5  -4  -9  202.69   50.37
   5   4   9  172.71   98.27
  -5   4  -9  218.44   59.90
   3  -6  -9   16.62   17.06
  -3   6   9  -22.64   48.23
  -3  -6   9   38.26   33.97
  -3  -6   9   46.96   34.37
   3  -6  -9   35.44   18.49
  -5  -7   0  234.12   53.00
  -5  -7   0  224.42   58.30
   5  -7   0  407.76   78.11
  -5   7   0  217.57  112.77
  -5  -7   0  229.94   67.65
  -5   6   9  120.99   29.89
  -5  -6   9   34.61   77.14
  -5  -6   9   86.63   31.80
   5  -6  -9   80.90   32.61
  -5   6   9  104.09   33.97
  -7  -3  14  -15.03   38.17
  -7  -3  14    5.31   24.08
  -7   3  14  -24.38   47.36
   7  -3 -14    1.40   14.25
 -12  -5   5  281.52  101.79
 -12   5   5  338.74   98.29
 -12   5   5  328.29  167.50
 -16   0   4 3106.24  153.61
  16   0  -4 3223.07  154.76
  16   1  -5  139.36   61.34
 -16   1   5   95.58   56.70
 -16  -1   5  148.66  101.97
  -5  -7   4  111.43   67.18
  -5   7   4   37.50   33.00
  -5  -7   4   66.29   28.22
  -5  -7   4   40.66   40.94
   5  -7  -4  103.89   34.75
   2   5 -1116684.38  489.37
  -2  -5  1113972.92  429.91
  -2   5  1117263.31  506.45
  -5  -3  14  102.64   86.44
  -5   3  14  130.51   70.40
  -5  -3  14  142.48   43.45
 -12  -5   4  128.72   68.49
  12  -5  -4  143.84   60.28
 -12   5   4  130.86   63.74
 -12  -4  -1   43.39   30.60
 -12   4  -1   24.34   41.84
  12  -4   1   60.44   42.60
   4   0  1222954.13  667.01
  -4   0 -1220735.00  580.32
 -11   0  -6  284.42   49.17
  11   0   6   -6.95   66.69
   9  -1 -15  255.02   81.74
  -9   1  15  376.74  169.55
  -9  -1  15  345.21   81.42
  -9  -1  15  417.43  156.31
  -9   1  15  422.77  137.21
   4  -6   6 6494.52  342.27
   4   6   6 6415.42  226.13
  -4  -6  -6 6320.75  191.20
  -4   6  -6 6658.75  235.50
  -4  -6  -6 6768.75  208.48
  -4  -6  -6 6724.17  207.04
   0   0  14   62.87   48.03
   0   0 -14   70.03   32.52
   0   0  14  103.04   45.07
  -4  -1  15  853.97  323.54
  -4   1  15  815.87   64.47
  -4   1  15  892.21  136.57
  -4   1  15  824.22   75.48
  -4  -1  15  839.35  102.54
  -9  -1  -8  453.61  122.68
  -9   1  -8  534.17  138.22
   9   1   8  486.92  126.66
   9  -1   8  414.99  123.75
  -7   6  -3   41.79   27.77
  -7  -6  -3    0.57    5.31
  -7  -6  -3    1.53    5.95
  -7  -6  -3  -20.61   26.38
   7  -6   3  101.50   57.85
  15   2  -2 2724.33  108.66
  15  -2  -2 2549.44  131.20
  15   2  -2 2854.94  112.89
 -15   2   2 2705.68  192.10
 -15  -2   2 2663.12  271.63
   2   1  13  552.00  185.13
  -2  -1 -13  491.50   84.39
  -2   1 -13  463.91   54.19
   2   1  13  283.14  102.96
   2  -1  13  483.09  142.09
 -12   2  -4  157.80  107.97
  12   2   4  170.24   69.30
 -12  -2  -4  243.51  120.37
  12  -2   4  165.69  119.17
 -10  -4  12   42.98   44.30
 -10   4  12   65.90   46.38
 -10  -4  12   79.96   70.06
  10  -4 -12   13.62   25.51
 -10   4  12   24.39   22.61
  11  -5   0  336.06   99.37
 -11  -5   0  327.13   98.14
 -11   5   0  335.43  127.31
  -4   7   5 3480.90  148.60
  -4  -7   5 3554.81  160.61
  -4   7   5 3404.25  280.88
  -4  -7   5 3746.64  143.40
 -10   1  -7  118.11   53.67
  10   1   7   67.77   50.18
 -10  -1  -7   54.07   32.10
  10  -1   7   29.58   25.58
  -3  -7  -3   -0.68   13.62
  -3  -7  -3   49.42   21.76
  -3  -7  -3   14.70    9.11
  -3   7  -3    7.35   25.05
   3  -7   3   49.16   43.73
   1  -5  10   31.07   16.77
  -1   5 -10   72.16   37.55
   1   5  10   73.81   56.17
  -6   4  13  467.66  185.20
  -6   4  13  390.65   30.61
  -6  -4  13  350.02  111.18
  -6  -4  13  412.28  179.00
 -12   5   6  208.16   68.87
 -12   5   6  260.27  113.52
 -12  -5   6  119.92   72.55
  12   5  -6  138.57   35.28
 -12  -5   6  193.08   42.54
 -16  -1   8  160.26   79.92
 -16  -1   8  220.00   60.03
 -16   1   8  114.92   49.60
 -16   1   8  219.75   59.08
  -5   4  13  783.97   74.45
  -5  -4  13  461.32  142.83
  -5  -4  13  785.22   65.29
 -10  -5  -2  342.14   67.72
  10  -5   2  340.96  124.15
 -10   5  -2  434.68  134.49
  -4  -7  -2  122.07   39.16
   4  -7   2   42.97   17.23
  -4  -7  -2   65.74   21.89
  -4  -7  -2   38.56   24.81
  -4   7  -2   30.78   31.06
 -14  -3   1   40.47   40.26
  14  -3  -1    9.74   48.06
  14   3  -1   17.18   21.60
 -14   3   1   34.33   51.82
 -15  -1  11  927.02   61.18
 -15   1  11  911.55  200.17
 -15  -1  11 1061.67   79.76
 -15   1  11  877.17  219.52
   2   6  -9   37.22   53.94
   2  -6  -9   61.40   23.46
   2  -6  -9   33.39   18.84
  -2   6   9   60.12   49.82
  -2  -6   9   55.00   44.26
 -13  -4   9  206.70   47.55
 -13  -4   9   97.37   80.69
 -13   4   9  167.33   74.53
 -13   4   9  242.16   86.62
  13   4  -9  154.50   45.28
 -12  -1  14  702.80  106.89
 -12   1  14  710.09   74.05
 -12   1  14  722.19  228.19
 -12  -1  14  718.82  218.03
 -11   3  13  886.14  224.40
 -11  -3  13  930.08   71.92
 -11  -3  13  493.72  213.29
 -11   3  13 1038.87  185.60
 -10   0  15    6.72   29.19
 -10   0  15    3.27   27.32
 -12   3  -3  199.61   94.92
  12  -3   3  133.07   55.93
  12   3   3  240.29   58.93
 -12  -3  -3  241.71   93.97
   0   7   5  889.15   77.94
   0  -7   5  793.70   52.85
   0  -7  -5  855.10   71.50
   0   7  -5  936.42  125.83
  -8  -3  14  290.28  101.05
  -8   3  14  306.73   94.77
   8  -3 -14  151.03   51.11
  -8  -3  14  293.22   83.91
  -8   3  14  273.51   64.82
  -8  -5  11 3193.06  145.39
  -8   5  11 3366.77  142.95
  -8  -5  11 3659.51  205.98
   8  -5 -11 3520.45  128.80
  -8   5  11 3313.82  130.32
   8  -1   9   35.69   22.51
  -8   1  -9   33.49   29.10
   8   1   9   43.93   45.39
  -8  -1  -9   34.46   28.01
  -3   0  15    9.84   15.53
  -3   0  15  -21.25   50.01
  -3   0  15   14.91   16.19
  -2   3 -12   36.35   16.60
   2  -3  12  156.53  104.20
   2   3  12   53.68   25.20
  12  -5  -3 2114.39  159.80
 -12  -5   3 1879.38  101.98
 -12   5   3 2028.30  120.31
 -16   0   9  -11.27   29.59
 -16   0   9   -5.58   51.16
  -1  -6  -8   26.76   13.54
   1  -6   8   64.05   44.39
  -1  -6  -8   23.61   18.36
  -1   6  -8   32.07   45.23
   1   6   8   38.78   39.00
  -6  -6   9   57.59   32.52
  -6  -6   9    6.93   19.27
  -6   6   9   12.05   25.26
  -6   6   9    9.69   15.58
   6  -6  -9   11.40    9.28
   2   4  11  151.93  114.36
   2  -4  11  364.41  108.58
  -2   4 -11  252.07  118.57
 -14   3  10   -8.04   43.76
 -14  -3  10   14.80   17.75
 -14  -3  10   48.87   37.67
 -14   3  10   20.86   42.40
   3  -5   9 1219.23   98.82
  -3   5  -9 1151.95   76.80
   3   5   9 1190.85   97.34
  -3  -5  -9 1214.20   59.92
  -3  -5  -9 1109.49   45.33
  -8   6   8  289.04  125.96
  -8   6   8  229.62   64.95
  -8  -6   8  174.44   70.45
  -8  -6   8  211.30   75.37
  -7   4  13 1502.91   91.22
  -7  -4  13 1645.87   84.88
   7  -4 -13 1576.23   64.50
  -7  -4  13 1035.57  180.00
   7   0  10 3544.29  241.67
  -7   0 -10 3667.33  203.96
  -4  -3  14   28.38   31.58
  -4  -3  14   55.56   34.73
  -4   3  14   30.06   42.20
 -11   2  14  421.39  106.83
 -11   2  14  446.63  120.82
 -11  -2  14  433.64  131.93
 -11  -2  14  474.74  163.04
  -2  -7  -4   59.94   40.98
   2   7   4   81.62   57.33
  -2  -7  -4   43.98   20.56
   2  -7   4   17.54   40.87
  -2   7  -4   54.68   50.01
 -13  -4   1  106.48   52.43
 -13   4   1  115.27   41.76
  13  -4  -1  210.23   41.48
 -15  -2  10   -0.95   28.54
 -15  -2  10   25.83   20.80
 -15   2  10   38.45   27.73
 -15   2  10   60.75   62.70
 -16   1   4  150.20   72.34
  16   1  -4  115.61   32.79
  16  -1  -4   86.01   47.22
 -16  -1   4  112.39   58.74
 -15   3   6   95.42   63.46
 -15   3   6   19.56   30.97
 -15  -3   6   26.06   55.61
 -15  -3   6   19.84   18.76
  15   3  -6    3.80   15.60
  -4  -4  13  446.77  134.78
  -4   4  13  381.09  131.78
  -4  -4  13  412.35  125.25
   4   1  12   12.99   22.55
   4   1  12   25.23   39.71
   4  -1  12   24.40   23.37
  -4  -1 -12   34.50   18.08
  -4   1 -12   -4.84   28.96
 -11   1  -6  473.46  138.88
  11  -1   6  252.57   98.93
  11   1   6  410.21   88.14
 -11  -1  -6  403.30   93.97
  -9  -6   7  265.57   73.26
   9   6  -7  270.99   59.79
  -9   6   7  306.20   75.57
  -9   6   7  322.12  109.90
  -9  -6   7  258.35   64.15
  -9  -6   0   49.31   37.02
  -9   6   0   53.88   19.65
   9  -6   0   41.60   30.97
  11   4   3  386.23   54.91
  11  -4   3  383.90   81.11
 -11   4  -3  534.10  183.74
 -11  -4  -3  496.70  122.88
   0   1  14  447.98  180.54
   0  -1  14  467.65   57.32
   0   1 -14  453.21   78.48
   0   1  14  478.94   31.72
   0   1  14  348.31   96.93
  -6  -7   2  134.95   46.76
  -6   7   2   70.26   50.00
  -6  -7   2  136.37   46.69
   6  -7  -2  265.46   69.23
  -6  -7   2  181.79   57.09
  15   3  -5 7750.88  222.58
 -15  -3   5 7292.02  246.16
 -15   3   5 6678.74  217.89
  15   3  -5 7168.01  219.60
 -10   5  10   91.84   56.05
 -10  -5  10   -5.94   26.04
 -10   5  10   25.03   36.00
 -10  -5  10   11.22   25.21
   6  -7  -3   54.12   46.91
  -6  -7   3  166.77   55.10
  -6  -7   3  120.50   44.32
  -6  -7   3   56.03   67.92
  -6   7   3  102.96   59.39
  -5  -7  -1 1858.23  151.03
  -5  -7  -1 1962.00   76.35
  -5   7  -1 2068.08  116.22
  -5  -7  -1 1951.24  130.66
   5  -7   1 2410.74  255.53
  -1   2  14  959.32   15.05
  -1  -2  14 1010.59   97.32
  -1   2  14 1109.85  124.88
   1   2 -14 1130.98   64.46
  -3  -6  -7   15.29   11.05
   3   6   7   33.06   38.08
   3  -6   7   80.51   72.90
  -3  -6  -7   44.43   30.05
  -3   6  -7   87.27   56.41
  -3  -6  -7   45.70   24.83
  -5   2 -11  549.92  126.62
   5   2  11  359.30  101.13
   5   2  11  537.23  155.56
  -5  -2 -11  481.75   54.36
   5  -2  11  557.84  164.89
 -11  -5   9 7936.97  271.15
 -11   5   9 7360.56  253.63
 -11  -5   9 7883.91  240.69
  11   5  -9 7741.95  232.46
 -11   5   9 7435.23  306.63
 -15   3   721857.92  627.85
  15   3  -721558.00  596.22
 -15   3   720713.50  632.62
 -15  -3   720923.30  581.68
 -15  -3   720557.36  613.28
   0   4 -12  620.23   65.20
   0   4  12  736.42  205.98
   0  -4  12  687.34  169.83
 -12  -5   717051.44  469.66
  12   5  -716896.71  473.61
 -12   5   717467.02  507.03
 -12   5   716790.93  503.84
 -12  -5   717621.79  558.09
  -5   7   5  190.71   53.74
  -5   7   5  303.28   89.50
  -5  -7   5  257.95   75.63
  -5  -7   5  277.09   86.09
  12   0   5   -4.56   31.67
 -12   0  -5   79.12   46.21
   8  -6   2  -42.40   63.87
  -8  -6  -2   20.58   14.74
  -8   6  -2   73.50   54.04
   7  -5   6   58.19   51.07
  -7   5  -6   57.84   50.96
   7   5   6   35.67   19.01
   7   5   6   22.35   19.66
  -7  -5  -6   35.46   35.36
  -7  -5  -6    1.62    9.79
   0   3 -13 2619.59  111.90
   0  -3  13 2580.39  188.30
   0   3  13 2837.60  194.40
  16   0  -3    0.36   24.93
 -16   0   3   16.47   52.88
  -7  -2  15   77.17   52.62
  -7   2  15  176.87   70.25
  -7  -2  15   92.32   76.40
  -7   2  15   40.98   31.85
  -7   2  15   67.17   30.02
 -10  -1  15 1395.81  195.91
 -10  -1  15 1313.91   92.78
 -10   1  15 1248.69  108.65
 -10   1  15 1192.55  107.67
  -6   2  15   89.69   28.60
  -6  -2  15  129.56   48.18
  -6  -2  15  104.36   79.85
  -6   2  15  155.32   84.83
 -10  -6   4  376.62  138.59
  10  -6  -4  381.85   78.42
 -10  -6   4  255.83   21.62
 -10   6   4  405.62   96.93
 -14   0  -2  612.81  155.68
  14   0   2  456.93  147.76
  -6  -7   1 9847.15  277.52
  -6   7   111004.80  389.78
  -6  -7   1 9754.76  274.69
   6  -7  -1 9965.24  317.52
  -6  -7   110285.53  314.05
   4  -3  11 2793.87  170.90
   4   3  11 2592.00   97.89
   4   3  11 2637.53  128.89
  -4   3 -11 2896.84  146.74
  -4  -3 -11 2736.66   96.39
 -15   0   0  366.21   81.62
  15   0   0  377.66  110.26
   1   5 -1112847.08  405.42
  -1  -5  1113072.94  393.41
  -1   5  1112702.04  380.20
  14   2   1  116.12   41.05
 -14   2  -1   85.53   68.20
 -14  -2  -1   54.85   28.44
  14  -2   1   37.38   61.59
  14   2   1   30.04   23.98
  -3   1  15 1435.22   97.62
  -3  -1  15 1438.45   77.47
  -3   1  15 1417.79   97.63
  -3   1  15 1451.30  100.92
  -3  -1  15 1453.85  174.15
 -16  -1   9  337.67   78.44
 -16   1   9  378.97   93.57
 -16  -1   9  406.74  130.70
 -16   1   9  230.34   97.82
  -8  -5  -5 8170.53  229.62
  -8  -5  -5 8323.86  252.74
  -8   5  -5 8374.39  361.74
   8  -5   5 8472.43  301.63
  -8   4  13   48.43   47.60
  -8  -4  13   70.55   65.35
   8  -4 -13  109.32   40.14
  -8   4  13  188.49   38.74
  -8  -4  13  158.13   45.40
   1  -6  -9   15.38    7.06
   1   6  -9   32.32   33.82
  -1  -6   9   43.81   35.94
  -1   6   9    2.13   38.91
   1  -6  -9    6.76    8.01
  -4  -4 -10 4756.21  136.96
   4   4  10 4619.76  134.06
   4  -4  10 4614.53  241.81
  -4   4 -10 5240.52  208.48
   4   4  10 4989.82  193.59
  -7  -1 -10  378.58   40.37
   7   1  10  330.93  118.13
   7  -1  10  262.93  120.36
  -7   1 -10  389.42  107.74
  10  -6  -3   85.52   60.59
 -10   6   3  127.11   74.35
 -10  -6   3   40.45   32.86
   6   5   7  653.96   79.05
  -6  -5  -7  692.49  101.53
   6   5   7  616.61   91.59
  -6  -5  -7  611.63   63.21
  -6   5  -7  621.37  177.86
   6  -5   7  590.83   96.41
   9  -3 -14  290.57   52.94
  -9  -3  14  253.29  100.07
  -9  -3  14  334.88   92.93
  -9   3  14  201.76  137.88
  -9   3  14  225.45   56.61
   6  -7  -4   23.46   22.03
  -6  -7   4   23.66   18.77
  -6   7   4   41.66   65.51
  -6  -7   4   33.94   19.60
  -6  -7   4   17.81   25.41
   9  -3   7 4203.89  163.67
  -9   3  -7 4900.39  213.76
  -9  -3  -7 4437.22  145.95
   9   3   7 4060.54  143.21
  -9  -3  -7 4239.39  174.99
  14   4  -5  155.93   37.88
  14   4  -5  185.76   41.61
 -14  -4   5  224.29   85.07
 -14   4   5  179.96   89.29
 -12   5   2  101.79   44.77
 -12  -5   2   21.75   16.98
  12  -5  -2   23.08   51.59
  15   3  -4    9.64    6.46
  15  -3  -4   39.76   32.26
 -15  -3   4  -88.04   53.72
 -15   3   4   37.14   31.63
 -14  -4   6 9947.96  312.16
 -14   4   610794.11  333.77
  14   4  -610325.63  288.26
 -14  -4   610043.36  280.63
 -14   4   6 9791.80  308.33
 -10   6   5  169.08   64.95
 -10   6   5   80.68   42.97
 -10  -6   5   52.72   38.48
 -10  -6   5   53.85   20.04
  -1  -7  -5 1327.91  120.80
   1  -7   5 1775.80  127.34
  -1   7  -5 1449.85  206.17
   1   7   5 1431.94  168.96
  -7  -6   9  979.48  128.41
  -7   6   9 1066.35  116.21
  -7   6   9 1168.38  142.31
  -7  -6   9  808.85  180.39
   7  -6  -9  906.23   72.50
 -14   0  13  -26.47   47.35
 -14   0  13   -4.43   42.73
 -14  -2  12 7742.45  248.20
 -14  -2  12 7587.84  248.10
 -14   2  12 7048.94  235.23
 -14   2  12 7104.78  251.38
 -13   2  13  -22.51   61.65
 -13  -2  13    1.43   26.32
 -13  -2  13   25.03   26.21
 -13   2  13   26.89   25.67
  -3   7   6   42.50   36.89
  -3   7   6   44.59   39.48
  -3  -7   6   -0.25   29.96
  -3  -7   6  -12.16   44.48
   8   3   8   14.39   31.36
  -8  -3  -8   24.74   15.68
   8   3   8   -3.28   31.62
  -8   3  -8   -9.11   26.76
   8  -3   8   -7.63   48.43
  -8   2  15  436.15   37.78
  -8   2  15  478.82  212.94
  -8  -2  15  481.35  175.72
  -8  -2  15  457.39   65.55
   8  -2 -15  460.01   48.51
  -2   7   6   41.32   42.29
  -2   7   6   22.24   25.42
  -2  -7   6  -13.87   31.39
  -2  -7   6   49.53   34.90
  -5   2  15 4795.35  143.41
  -5   2  15 4562.17  187.54
  -5   2  15 4878.04  149.47
  -5  -2  15 4826.63  174.35
  -5  -2  15 4563.79  167.10
  -3   3  14 1286.26  141.61
  -3  -3  14 1064.88   93.62
  -3  -3  14 1271.34  181.74
  -3   4  13  862.94  103.04
  -3  -4  13  791.61   56.70
  -3  -4  13  931.39  114.72
 -12  -4  11  400.48   87.38
 -12   4  11  270.10   94.76
 -12   4  11  293.36   81.54
 -12  -4  11  319.84  103.99
 -15   3   8   68.17   42.93
  15   3  -8   21.84   19.09
 -15  -3   8   -0.14   21.14
 -15  -3   8   31.98   43.38
 -15   3   8   14.01   26.38
 -10  -3  -6   28.06   28.47
 -10  -3  -6   10.61   10.28
  10  -3   6   -1.96   51.30
 -10   3  -6   30.22   23.34
  10   3   6   13.51   23.58
  12  -1   5   58.98   34.05
  12   1   5   36.06   41.09
 -12   1  -5   70.63   67.73
 -12  -1  -5   77.58   30.33
 -14  -4   4  484.25  160.21
 -14   4   4  421.58  113.65
  14  -4  -4  525.81  126.67
  16  -1  -3 1684.99  131.82
 -16  -1   3 1807.94  129.10
  16   1  -3 1805.21  124.89
 -16   1   3 2048.34  333.96
  -4   7   6  -16.54   44.80
  -4   7   6   30.70   34.46
  -4  -7   6   -5.26   30.45
  -4  -7   6   28.60   23.67
 -16  -2   6 6838.13  207.94
 -16  -2   6 7144.81  325.72
 -16   2   6 6922.72  247.44
 -16   2   6 6973.81  253.63
  16   2  -6 7259.30  217.48
  -9  -5  11 3956.35  131.74
  -9  -5  11 3782.40  193.61
  -9   5  11 3631.37  158.24
   9  -5 -11 3823.90  154.62
  -9   5  11 4017.97  170.72
 -14   4   7  109.47   64.56
 -14  -4   7   82.36   58.97
 -14  -4   7   71.46   18.82
 -14   4   7   11.51   36.65
  14   4  -7   49.36   37.99
 -16   0  10 9916.46  359.50
 -16   0  10 9914.60  375.01
  -6   0 -11   12.46   16.88
   6   0  11   31.20   21.38
  -9   5  -4  110.20   61.19
  -9  -5  -4  251.70   77.54
   9   5   4  196.47   38.33
   9  -5   4  173.07   87.40
  -9  -5  -4  195.20   31.98
  13  -2   3 1680.44  241.71
  13   2   3 1642.32  121.30
 -13  -2  -3 1894.45  100.85
 -13   2  -3 1705.83  167.59
 -11   0  15  -15.35   42.46
 -11   0  15    9.22   32.49
  14  -1   2   50.33   56.76
 -14   1  -2   88.62   40.10
 -14  -1  -2   50.23   38.30
  14   1   2   36.20   34.24
 -10  -6   2  898.73  103.46
  10  -6  -2  987.00  226.63
 -10   6   2  829.55   87.31
  15  -2  -1  437.54  102.69
 -15   2   1  384.30  100.54
 -15  -2   1  349.35  101.46
  15   2  -1  428.94   74.81
  15   2  -1  330.83   78.03
  -1   7   6  134.54   61.90
   1  -7  -6   77.47   27.55
   1  -7  -6   95.44   34.94
  -1  -7   6  100.49   35.52
   1   7  -6   61.49   50.64
  -6   7   0  285.96  110.07
  -6  -7   0  382.12   87.60
   6  -7   0  400.90   84.56
  -6  -7   0  254.72   56.87
  -6  -7   0  333.87   49.86
  15  -1   0   55.70   47.94
 -15  -1   0  -41.99   42.69
 -15   1   0  -11.17   45.48
  15   1   0   28.18   18.36
 -16   2   7  506.80  136.80
 -16  -2   7  553.65  142.76
 -16   2   7  589.36  161.36
 -16  -2   7  616.40  163.32
  16   2  -7  402.14  124.67
  -2   0  15  -13.93   25.10
  -2   0  15   -5.42   47.42
  -2   0  15   13.67   16.84
 -15   0  12  320.41  113.30
 -15   0  12  307.96   64.65
  -4  -7  -3   -6.02   20.61
   4  -7   3   73.87   54.70
  -4  -7  -3    9.99    8.84
  -4  -7  -3   20.46   27.41
  -4   7  -3   39.61   46.66
 -13   3  12   68.26   68.12
 -13  -3  12  200.81   69.63
 -13  -3  12  180.00   52.57
 -13   3  12  216.82   93.74
 -13   0  14   78.50   61.82
 -13   0  14   59.13   54.72
   5  -5   8   48.56   34.75
   5   5   8   27.04   25.26
  -5  -5  -8   37.39   14.20
  -5   5  -8   24.94   28.04
  -5  -5  -8   13.64   13.92
   7   3   9  959.73   53.96
  -7  -3  -9  977.58   73.52
   7   3   9  961.91   97.98
  -7   3  -9  781.87   73.94
   7  -3   9 1168.29  132.87
 -10  -6   6 1705.26  106.12
 -10  -6   6 1645.59   64.82
  10   6  -6 1777.94   84.81
 -10   6   6 1619.01  112.63
 -10   6   6 1710.26  128.91
 -11  -4  12 6402.04  219.90
 -11   4  12 6727.32  238.84
 -11   4  12 7296.54  228.17
 -11  -4  12 6938.04  217.60
 -16   2   5   58.92   60.92
  16   2  -5   29.95   25.44
  16   2  -5   99.64   38.28
 -16  -2   5  106.43   49.88
  16  -2  -5   59.34   46.92
 -11   5  -1  891.48  112.37
 -11  -5  -1  841.72  114.40
  11  -5   1  873.33  184.95
  -3   7  -4   53.71   28.79
   3   7   4   95.55  100.29
   3  -7   4  195.13   95.87
  -3  -7  -4   89.05   41.68
  -3  -7  -4  127.44   64.81
 -14   1  13  535.11  236.90
 -14  -1  13  577.72  123.39
 -14   1  13  507.33  131.12
 -14  -1  13  524.93  167.53
 -12  -5   8   31.10   20.47
 -12  -5   8  -36.69   63.90
  12   5  -8   19.22   29.45
 -12   5   8   17.62   35.54
 -12   5   8   17.94   59.81
  -8  -4  -7  724.00   91.66
   8  -4   7  537.72  151.93
  -8   4  -7  726.16  159.50
   8   4   7  650.03  128.66
   8   4   7  546.40  146.95
  -8  -4  -7  539.41   78.02
 -13  -4  10  326.05  194.77
 -13   4  10  416.10  150.87
 -13   4  10  608.01  187.40
 -13  -4  10  563.01   86.65
  -9  -2  15  991.46   68.46
  -9   2  15 1086.18  136.71
  -9   2  15 1207.79  146.47
   9  -2 -15  958.81   86.67
  -9  -2  15 1040.04  208.70
  -6   7   5 5881.16  228.88
  -6  -7   5 5641.07  172.44
  -6  -7   5 5923.07  238.24
   6   7  -5 6377.87  199.39
  -4   2  15 3054.71  103.30
  -4   2  15 2788.44   94.38
  -4   2  15 2882.57  249.53
  -4  -2  15 2853.60  125.84
  -4  -2  15 3065.25  146.55
   9   2   8 5207.87  209.79
  -9   2  -8 5489.69  201.82
  -9  -2  -8 5387.96  201.25
   9  -2   8 5303.39  192.45
  -9   4  13  160.24   50.41
   9  -4 -13  121.08   46.97
  -9  -4  13  151.84   68.57
  -9   4  13  115.14   47.44
  -9  -4  13  108.35   69.08
  -5  -7  -2  352.50   90.13
  -5   7  -2  314.03  150.44
  -5  -7  -2  336.06   58.27
  -5  -7  -2  286.40   52.80
   5  -7   2  320.15  105.46
   2   2  13  397.72  121.78
   2   2  13  348.26   56.17
  -2   2 -13  462.76  129.27
   2  -2  13  425.61  144.15
  -2  -2 -13  213.06   34.85
   2  -6   8   19.09   19.47
  -2  -6  -8   26.50   19.13
   2   6   8   35.04   27.53
  -2   6  -8   40.89   49.41
  -2  -6  -8   23.59   14.98
   9   4   6 1451.39  105.64
   9  -4   6 1522.05  118.03
  -9  -4  -6 1639.08   72.58
  -9  -4  -6 1426.84  154.83
  -9   4  -6 1381.13  112.34
 -15   3   3 4090.58  176.38
 -15  -3   3 4256.82  187.32
  15   3  -3 4157.76  124.34
  15  -3  -3 4178.19  175.03
 -10   2  -7  556.71  208.91
 -10  -2  -7 1030.78  148.27
  10   2   7  907.18  146.33
  10  -2   7  837.39  188.85
 -14   3   0   11.92   42.27
  14  -3   0   46.27   27.12
  14   3   0   -8.92   12.32
 -14  -3   0   27.71   33.01
  13   3   2  329.49   39.88
  13  -3   2  298.98   98.81
 -13   3  -2  342.76   83.84
 -13  -3  -2  336.30   90.95
   2  -5  10  108.53   49.59
  -2   5 -10  204.73   98.08
   2   5  10   78.45   66.87
  -9   6   8 1270.10  111.74
  -9  -6   8 1335.88  145.27
  -9   6   8 1313.67  115.53
   9   6  -8 1255.90   83.44
  -9  -6   8 1219.25   80.55
   3   0  13   34.22   39.82
   3   0  13   16.84   16.16
  -3   0 -13  -15.53   23.39
  -9   6  -1  -26.95   44.94
   9  -6   1  108.39   54.49
  -9  -6  -1  -12.19   32.38
   6   6   5   25.76   18.29
  -6  -6  -5   13.77   18.30
   6  -6   5   33.14   57.21
  -6   6  -5   57.11   43.83
  -6  -6  -5   44.69   18.54
 -16   2   8 7402.93  299.97
 -16   2   8 8159.80  262.76
 -16  -2   8 9158.20  320.45
 -16  -2   8 8941.37  270.68
  13  -4   0   44.03   39.21
 -13  -4   0  -34.53   45.14
 -13   4   0   35.27   53.82
  -5   7   6  108.32   63.93
  -5   7   6   37.74   30.26
  -5  -7   6   49.23   41.74
  -5  -7   6   43.22   24.73
   5  -5 -12    5.27    7.09
  -5   5  12   31.43   28.92
  -5  -5  12   87.18   45.75
  -5  -5  12  113.75   52.14
   1   0  14  922.59  104.15
   1   0  14 1076.58   88.82
  -1   0 -14  858.89  100.70
  13   0   4   64.79   72.67
 -13   0  -4  101.38   47.45
  -7   4  -8 1620.86  117.07
   7   4   8 1545.58  100.94
  -7  -4  -8 1599.25  110.97
  -7  -4  -8 1563.53   71.27
   7   4   8 1732.73   94.99
   7  -4   8 1547.66  114.32
  11  -3   5  597.15  134.55
 -11  -3  -5  584.68   91.45
  11   3   5  508.42  140.82
   0   6  -9   35.96   23.65
   0  -6   9   11.44   35.43
   0   6   9   -1.22   38.89
   0  -6  -9   -2.50    7.61
   0  -6  -9   -6.72    8.63
 -15  -2  11   82.72   68.67
 -15   2  11  -40.05   47.00
 -15  -2  11    8.48   19.09
 -15   2  11  -17.60   43.74
 -12   4  -2  602.77  150.35
  12  -4   2  613.19  200.97
 -12  -4  -2  519.12  109.84
 -16  -1  10   35.88   29.59
 -16  -1  10    2.51   62.22
 -16   1  10   13.80   36.32
 -16   1  10    4.26   28.02
 -12  -3  1311047.85  356.27
 -12   3  1310916.63  338.36
 -12  -3  1311031.69  325.63
 -12   3  1310496.01  306.84
 -12   2  14 1172.64   75.91
 -12   2  14 1088.66  190.62
 -12  -2  14 1079.00   88.43
 -12  -2  14 1255.69   80.44
  -6   1 -1112699.43  402.06
  -6  -1 -1113306.36  375.25
   6   1  1113231.60  488.45
   6  -1  1113554.54  413.69
 -14  -4   3   42.22   35.37
  14  -4  -3  125.51   43.58
 -14   4   3  144.00   72.17
 -10  -3  14   30.37   15.31
 -10  -3  14   -4.17   50.14
 -10   3  14   39.50   57.62
  10  -3 -14   12.68   22.85
 -10   3  14   27.54   24.29
 -14  -3  11 6210.59  222.54
 -14   3  11 5485.52  190.70
 -14   3  11 5671.75  196.90
 -14  -3  11 5647.10  201.63
  16   0  -2   39.80   36.19
 -16   0   2   21.00   27.05
  -6  -5  12   62.29   37.44
  -6   5  12  113.56   50.17
 -11   1  15  960.22   99.40
 -11  -1  15 1181.04   74.20
 -11  -1  15 1094.31   74.63
 -11   1  15 1064.38   85.50
   8  -2   9  631.54  205.41
  -8   2  -9  761.35  172.76
  -8  -2  -9  669.76   52.47
   8   2   9  712.16  167.51
  -7  -6  -4  270.81   54.70
  -7  -6  -4  300.24  109.77
   7  -6   4   38.80   58.46
  -7   6  -4  387.43  144.85
 -14  -4   8 2873.91  123.37
 -14   4   8 2996.72  202.42
  14   4  -8 3229.69  130.06
 -14   4   8 3210.17  159.42
 -14  -4   8 2954.11  343.21
  -5  -6  -6   -1.75   14.24
   5  -6   6   20.58   26.50
  -5   6  -6   18.11   34.90
   5   6   6   14.01   13.87
  -5  -6  -6   -5.25   11.50
  -5  -6  -6   -3.25   16.10
  12  -5  -1  533.72  124.84
 -12  -5   1  608.36   62.63
 -12   5   1  532.45  143.34
  -2  -4  13 1243.64  187.20
  -2   4  13 1065.56  190.95
  -2  -1  15 1776.51  107.64
  -2  -1  15 1420.73  118.17
  -2   1  15 1391.99  168.68
  -2   1  15 1711.81   72.61
   0   7  -6  781.45  227.35
   0  -7   6  843.88   83.76
   0   7   6  894.72  132.99
   0  -7  -6  746.88   93.38
   0  -7  -6  773.71   63.95
 -15   1  12  483.30  149.83
 -15  -1  12  462.32  161.02
 -15  -1  12  455.00  108.26
 -15   1  12  533.93  170.05
 -15  -3   9 2021.14  108.25
 -15   3   9 2486.93  122.62
  15   3  -9 2122.85  105.92
 -15   3   9 2028.78  105.61
 -15  -3   9 2047.15  140.50
 -13   1  14  223.58  118.45
 -13  -1  14  297.63   85.15
 -13   1  14  260.21   84.42
 -13  -1  14   60.08   32.43
  -4  -5  12   83.00   51.39
  -4  -5  12  159.04   70.44
  -4   5  12  184.55   50.05
  -2  -7  -511528.77  337.17
   2   7   510401.65  338.46
  -2   7  -511388.94  421.98
   2  -7   512190.67  383.96
  -8   6   9   51.51   48.34
  -8   6   9  146.71   58.33
  -8  -6   9   61.44   30.09
  -8  -6   9   88.33   52.03
   0   5  11 2975.75  136.11
   0  -5  11 3059.36  155.46
   0   5 -11 3204.69  141.99
   7  -7  -3  306.65   70.25
  -7  -7   3  225.17   66.18
  -7  -7   3  205.56   52.49
  -7  -7   3  178.77   75.56
  -7   7   3  226.63   59.54
  16   2  -4   51.67   38.35
  16  -2  -4   46.00   37.11
 -16  -2   4   12.00   21.96
 -16   2   4  -12.12   52.31
  16   2  -4   12.74   21.94
  -2   3  14   77.39   59.26
  -2  -3  14   48.03   29.40
  -2  -3  14  110.30   60.24
 -10  -6   1  106.55   49.06
  10  -6  -1   61.33   55.12
 -10   6   1   -8.13   40.82
  -7  -7   2   79.87   41.32
   7  -7  -2   90.90   56.73
  -7  -7   2   97.24   30.05
  -7   7   2   54.33   34.91
  -7  -7   2   91.07   30.49
  -4   2 -12 4738.83  189.43
   4   2  12 4733.57  155.82
  -4  -2 -12 4751.99  147.70
   4  -2  12 4374.42  164.71
   4   2  12 4337.84  187.45
  11   2   6 3003.81  168.42
  11  -2   6 2265.96  249.89
 -11   2  -6 3370.48  164.20
 -11  -2  -6 3151.99  149.92
 -10   4  -5  297.49   59.10
 -10  -4  -5  219.37   50.28
  10   4   5  220.71   45.20
  10  -4   5  245.22   51.91
 -10  -4  -5  199.28   85.12
  10  -5   315461.20  474.93
 -10  -5  -315604.77  489.00
 -10   5  -314955.33  449.17
  -4   6  10    7.37   15.28
  -4   6  10   58.83   46.01
  -4  -6  10   70.58   35.39
  -4  -6  10   27.49   60.11
   0   2  14 2692.95   90.31
   0   2 -14 2617.50  161.69
   0   2  14 2581.89   87.37
   0  -2  14 2374.57  136.38
   0   2  14 2828.33  163.91
  -5  -6  10  813.06   67.00
  -5   6  10  760.85   84.61
   5  -6 -10  738.07   34.37
  -5  -6  10  887.12   91.54
  -5   6  10  622.95  220.03
  -7   5  12   24.32   20.75
  -7  -5  12   74.98   29.95
  -7  -5  12   49.07   30.44
  -7   5  12   68.35   35.14
   7  -5 -12   43.54   26.11
  -6   7  -1  464.61  158.09
  -6  -7  -1  346.38   30.89
   6  -7   1  491.02  110.65
  -6  -7  -1  441.30   89.95
  -6  -7  -1  345.87   51.11
  -1   4 -12 1292.49   73.25
   1   4  12 1054.50   77.89
   1  -4  12  913.46  134.13
   6   3  10    8.71    8.76
  -6  -3 -10   18.32    9.73
  -6   3 -10    7.59   44.69
   6   3  10   33.16   41.76
   6  -3  10   52.74   30.81
 -11   5  10   87.72   30.59
 -11  -5  10   55.34   33.93
 -11   5  10  135.59   61.74
 -11  -5  10  118.00   69.74
  -7   7   4   52.03   81.73
  -7  -7   4  113.68   48.92
  -7  -7   4  153.20   46.81
   7  -7  -4  186.44   54.70
  -7  -7   4  157.08   85.61
  10   6  -7  237.56   56.41
 -10   6   7  206.51  102.14
 -10  -6   7  219.66   60.51
 -10   6   7  128.90   81.98
 -10  -6   7  105.81   70.87
   3  -1  13   46.55   44.48
  -3   1 -13   18.73   22.20
  -3  -1 -13   13.93   14.02
   3   1  13   16.12   27.00
   3   1  13   72.98   57.65
   3   4  11   -4.99   40.44
   3  -4  11   17.00   45.37
  -3   4 -11   -7.11   40.08
   1   1  14  646.84  102.36
   1  -1  14  675.72  198.85
   1   1  14  684.66   39.36
  -1   1 -14  642.97   55.08
 -13   1  -4   98.05   57.30
  13  -1   4  137.19   87.76
 -13  -1  -4   83.35   96.95
  13   1   4   42.36   30.24
   4   5   9   39.02   41.36
  -4  -5  -9   22.21   15.05
   4  -5   9   88.66   51.52
  -4   5  -9   26.80   29.59
  -4  -5  -9   10.60    8.34
  -3   6  10 2278.80  116.72
  -3  -6  10 2282.02  106.02
   3  -6 -10 2112.20   99.08
  -3  -6  10 2101.78  142.24
   3  -6 -10 2192.20   99.38
   6  -4   9  146.13   80.01
   6   4   9  123.06   50.03
  -6  -4  -9  125.07   53.24
   6   4   9   35.92   20.02
  -6   4  -9   57.51   75.89
   1   3  13 5842.66  196.56
   1  -3  13 6017.78  290.34
  -1   3 -13 6450.05  248.63
  10  -2 -15 1218.55   97.37
 -10  -2  15 1278.81   78.43
 -10   2  15 1503.42  252.78
 -10   2  15 1184.53   64.92
 -10  -2  15 1305.15   76.92
 -16   1   2  331.59  110.67
 -16  -1   2  256.49  115.25
  16   1  -2  225.29   54.82
  16  -1  -2  255.22   70.59
   3  -3  12   -5.20   58.91
   3   3  12    8.93    4.41
   3   3  12   64.30   47.16
  -3   3 -12   56.70   28.49
  -8  -6  -3    6.24   18.64
  -8  -6  -3   19.83    7.68
  -8  -6  -3    3.90    4.32
  -8   6  -3   34.45   59.80
   8  -6   3  -20.98   66.22
  -4  -6  -7   -1.60   11.85
   4  -6   7    6.50   49.28
  -4  -6  -7   26.05   18.86
   4   6   7   23.76   23.99
  -4  -6  -7   -7.76   12.84
  -4   6  -7   64.10   36.41
  -3  -2  15 2622.08  133.12
  -3   2  15 2758.64  133.27
  -3   2  15 2800.78   94.18
  -3   2  15 2444.46   82.65
  -3  -2  15 2536.05  133.00
 -16   2   9  187.82   43.78
 -16   2   9  296.37   88.71
 -16  -2   9  256.35   54.01
 -16  -2   9  169.60   66.39
  -3  -5  12    8.54   26.60
  -3   5  12   59.88   26.94
  -3  -5  12   86.34   58.84
   7  -7  -114564.90  444.87
  -7  -7   114680.03  430.63
  -7  -7   115106.37  409.51
  -7   7   114827.28  470.59
  -6  -6  10   59.22   47.46
  -6   6  10   14.12   31.20
  -6   6  10  162.79   93.21
  -6  -6  10   64.15   61.24
   7   2  10   11.38   17.99
   7   2  10   29.33   34.24
   7  -2  10   13.02   35.87
  -7   2 -10   14.27   23.20
  -7  -2 -10   33.59   17.72
  -7   0  16 1128.05  110.21
  -7   0  16 1197.56   64.12
  -6  -7   6  207.69   98.53
  -6  -7   6  102.74   88.64
  -6   7   6  263.55   64.83
  -6   7   6  348.57   87.66
 -10   5  11  789.99  102.18
 -10  -5  11  905.02  250.64
 -10   5  11  694.14  197.96
 -10  -5  11  792.29  144.14
 -16   0  11   73.87   70.75
 -16   0  11  -46.09   34.40
   5   0  1217434.87  622.61
  -5   0 -1216447.07  472.54
  -3  -7   7  899.75  145.89
  -3   7   7  910.13  322.30
  -3  -7   7 1008.96  117.90
  -3   7   7  867.60  108.13
  -6   0  16 3001.62  121.53
  -6   0  16 2929.80  149.00
  -6   0  16 2951.32  139.16
  -8   0  16   14.13   16.70
  -8   0  16   58.74   43.45
 -10  -4  13  281.88  162.76
 -10   4  13  313.77   91.67
 -10   4  13  204.59  121.54
 -10  -4  13  210.45   78.31
  10  -4 -13  220.89  103.81
 -12   0  15   -7.04   28.61
 -12   0  15   55.86   40.14
  15   3  -2   31.93   19.11
 -15   3   2   89.25   67.22
  15  -3  -2   85.81   43.97
 -15  -3   2  -31.03   45.45
  13  -5  -5  208.27   83.85
 -13  -5   5   94.42   56.38
 -13   5   5  106.68   65.71
 -12  -5   912846.92  390.59
 -12  -5   912537.60  353.21
 -12   5   913038.38  405.10
 -12   5   913031.33  386.07
  12   5  -912743.92  361.01
  12  -3   4   44.75   49.14
 -12  -3  -4   84.22   22.49
 -12   3  -4   46.06   35.63
  12   3   4   42.11   27.18
 -12  -3  -4   74.93   27.60
 -14  -4   2 9989.27  356.14
 -14   4   210127.85  322.31
  14  -4  -2 9930.78  311.59
  15   0   1   10.26   21.91
 -15   0  -1   32.57   32.53
  -1   0  15   57.19   45.00
  -1   0  15    4.82   17.54
  -1   0  15    8.07   16.74
  -4  -7   7 7624.05  229.95
  -4  -7   7 8040.38  321.77
  -4   7   7 8120.30  266.10
  -4   7   7 7946.61  276.37
   1  -7   6  139.20   71.13
   1   7   6  167.13   38.28
  -1  -7  -6  116.01   43.38
  -1  -7  -6  101.41   38.10
  -1   7  -6  144.73  103.20
  -7  -7   520055.32  548.55
  -7  -7   521114.78  605.73
  -7   7   520088.91  587.48
  -7   7   519994.57  579.43
   2  -7  -7 1135.12   94.33
   2  -7  -7 1189.72   90.90
  -2   7   7 1234.55  161.00
  -2  -7   7 1291.98   71.86
  -8   5  12  -20.04   49.06
  -8   5  12   30.93   24.08
   8  -5 -12   14.62   12.77
  -8  -5  12   10.06   47.04
  -8  -5  12   30.49   32.02
 -13   5   6   17.25   44.88
 -13   5   6   35.32   37.07
  13   5  -6   28.42   14.87
 -13  -5   6   18.54   10.27
 -13  -5   6  109.90   47.24
 -14  -4   9  406.88  136.87
 -14   4   9  241.85  111.29
 -14   4   9  297.84  102.30
  14   4  -9  239.74   74.79
 -14  -4   9  252.24   63.42
 -12   2  -5 1378.47   90.13
  12   2   5 1139.55   92.63
  12  -2   5  659.59  173.31
 -12  -2  -5 1407.34   74.84
  -2   6  10 5182.52  188.10
  -2  -6  10 5130.68  297.36
   2   6 -10 4846.54  282.96
   2  -6 -10 4993.81  143.71
   2  -6 -10 5046.87  146.41
  16  -2  -3  587.56  196.88
 -16  -2   3  545.33  154.70
  16   2  -3  345.01  129.70
 -16   2   3  629.99  223.55
  16   2  -3  638.20  122.26
 -13  -5   4   27.01   46.02
 -13   5   4   41.48   53.82
  13  -5  -4   20.77   44.15
 -11  -4  -4 1045.26   58.21
 -11   4  -4 1021.50  284.51
 -11  -4  -4 1102.56   43.81
  11  -4   4 1075.60  268.53
 -17   0   7    5.24   16.58
 -17   0   7  -19.84   71.66
 -17   0   6 2033.68  256.76
 -17   0   6 2136.08  179.94
 -14  -2  -2 1108.76  206.50
  14   2   2 1688.29   90.68
  14   2   2 1623.24  116.08
  14  -2   2 1699.14  202.45
 -14   2  -2 1674.17  114.08
  -4  -7  -4   63.94   30.21
  -4   7  -4   61.77   42.95
   4  -7   4   37.76   55.90
  -4  -7  -4   33.38   12.85
  15   2   0 1943.06  101.38
 -15   2   0 1983.90  230.08
 -15  -2   0 1896.67  137.64
  15   2   0 1839.59  108.14
  15  -2   0 1846.58  164.57
  -5  -7  -3 2727.65  107.88
  -5   7  -3 2922.57  144.72
  -5  -7  -3 2732.20  144.03
   5  -7   3 2534.57  175.95
  -5  -7  -3 2914.39  110.72
  -1  -6  -9  172.28   33.24
   1  -6   9   55.18   63.99
   1   6   9  183.06   60.15
  -1  -6  -9  142.97   47.71
  -1   6  -9  281.36   60.02
 -10   0  -8  757.43   75.20
  10   0   8  846.59  173.22
  -5   0  16  516.92   85.77
  -5   0  16  598.91  133.32
  -5   0  16  594.65   81.65
 -11  -3  14   11.83   35.97
 -11   3  14   40.61   25.44
 -11  -3  14   20.39   34.10
 -11   3  14   24.52   37.75
  -7  -1  16  250.74   66.84
  -7   1  16  147.90   93.84
  -7  -1  16  200.31   58.36
  -7   1  16  236.35   65.66
  -7   1  16  139.14   40.80
  -1   4  13  949.70  197.00
   1   4 -13 1569.96  173.16
  -1  -4  13  945.38  162.99
   7  -6 -10  141.22   45.14
  -7  -6  10  187.96   70.26
  -7   6  10  208.86   58.96
  -7   6  10  188.54   83.25
  -7  -6  10  213.28  124.54
 -15  -3  10   10.85   35.47
 -15   3  10  -10.31   48.65
 -15   3  10   20.05   28.11
 -15  -3  10   19.48   18.23
  -9   0  16  613.77   78.02
  -9   0  16  557.70  133.60
  10  -6   0 2956.87  184.30
 -10  -6   0 2381.47  168.64
 -10   6   0 2490.58  127.91
  -7   7   0   76.15   29.99
  -7  -7   0  134.63   40.22
   7  -7   0  107.26   61.27
  -7  -7   0  100.20   28.92
  -7  -7   0  172.67   45.40
   9   0   9   50.15   31.34
  -9   0  -9   18.50   28.48
 -16   1  11 7104.34  292.39
 -16  -1  11 7201.21  248.91
 -16   1  11 8328.33  287.33
 -16  -1  11 7279.98  281.88
   5  -1  12  132.64   52.56
   5   1  12   96.56   78.00
   5   1  12  141.20   60.35
  -5  -1 -12  181.70   44.56
  -5   1 -12  172.28   38.07
 -17   0   8 1513.26  226.27
 -17   0   8 1508.30   88.40
 -14   2  13    3.27   54.48
 -14  -2  13  -13.78   53.64
 -14   2  13    2.71   23.31
 -14  -2  13  -18.86   33.07
  -5  -7   711109.30  343.86
  -5  -7   711365.98  329.13
  -5   7   712730.66  415.53
  -5   7   710830.27  318.06
  11  -6  -4  823.07  173.59
 -11   6   4  631.47  185.79
 -11  -6   4  663.91  187.09
  -6  -1  16  441.18  111.98
  -6   1  16  405.65  104.43
  -6  -1  16  382.85  113.17
  -6   1  16  379.40  151.31
  -6   1  16  332.23   90.83
  -2  -5  12   20.00   54.04
  -2   5  12   38.66   29.06
   2   5 -12    9.39   31.76
  12  -5   0   -4.03   63.80
 -12  -5   0   73.80   40.42
 -12   5   0  114.44   71.45
  -8  -1  16  252.50   71.36
  -8   1  16  307.52   71.33
  -8   1  16  142.80   49.21
  -8   1  16  334.84  100.81
  -8  -1  16  289.18   94.77
 -12   4  1216407.15  466.88
 -12  -4  1216465.23  472.73
 -12   4  1216345.32  485.07
 -12  -4  1215673.28  492.94
   1  -7  -7 3560.33  140.40
   1   7  -7 3353.54  159.90
  -1  -7   7 3249.62  139.41
  -1   7   7 3329.94  168.16
   1  -7  -7 3320.06  144.39
 -14   0  -3   48.99   35.20
  14   0   3   23.20   27.37
 -12   1  15  376.85  123.48
 -12   1  15  447.00  149.24
 -12  -1  15  381.70  160.75
 -12  -1  15  429.81  153.04
  11   0   7   40.64   34.05
 -11   0  -7   46.72   37.73
 -13   4  11  587.54  141.43
 -13  -4  11  611.67  203.29
 -13  -4  11  493.39  120.26
 -13   4  11  538.13  131.79
  -9   6   9   14.31   38.97
  -9   6   9    2.60   31.92
  -9  -6   9   21.21   55.48
 -11  -6   5   28.82   26.56
 -11  -6   5    7.49    5.64
 -11  -6   5   12.92    8.13
 -11   6   5  -17.94   35.09
  -9  -6  -2 3449.64  170.01
   9  -6   2 3643.00  240.05
  -9   6  -2 3342.98  157.20
   3   7   5 9350.27  299.24
  -3   7  -510262.70  340.85
  -3  -7  -510248.43  291.24
   3  -7   5 9918.12  419.03
  -3  -7  -510039.46  303.23
 -17   0   5   30.82   41.44
  17   0  -5   -0.73   18.57
 -13  -5   7 2834.56  100.74
  13   5  -7 3121.37  115.97
 -13  -5   7 2790.91  140.92
 -13   5   7 2667.51  220.85
 -13   5   7 2954.95  147.01
 -11   5  -2  448.30  199.13
 -11  -5  -2  394.80   89.10
  11  -5   2  457.53  116.29
 -15   1  -1   22.38   26.41
  15   1   1   21.95   23.83
  15  -1   1   23.92   26.91
 -15  -1  -1   28.89   52.96
   3  -6   8   -7.91   47.37
  -3   6  -8   13.86   24.29
  -3  -6  -8    6.13    9.25
  -3  -6  -8   37.50   18.08
   3   6   8   57.65   31.16
  -1  -3  14   48.61   39.77
   1   3 -14  113.46   43.66
  -1   3  14  -27.40   50.96
  -1  -1  15  529.17  166.56
  -1   1  15  497.76  156.79
  -1  -1  15  475.94  103.38
  -1   1  15  518.53   86.15
  -1   1  15  507.20   61.69
   5   4  1014764.30  456.32
  -5  -4 -1014615.83  403.21
  -5   4 -1014835.88  516.57
   5  -4  1015191.14  478.56
   5   4  1017254.59  470.71
  16   0  -1   16.06   25.17
 -16   0   1   24.66   34.08
   5   3  1110143.09  283.50
   5   3  11 8851.63  270.49
  -5   3 -1110489.49  355.33
   5  -3  11 9045.70  294.78
  -5  -3 -11 8848.09  248.17
 -13   5   3 9215.83  353.20
  13  -5  -3 8748.07  367.88
 -13  -5   3 8945.80  339.57
 -10  -6   8 7595.72  221.87
  10   6  -8 6632.65  206.82
 -10  -6   8 7436.61  267.98
 -10   6   8 7577.51  269.11
 -10   6   8 7341.29  292.01
   6  -7   2  164.48   53.83
  -6  -7  -2   43.71   20.26
  -6  -7  -2   92.58   29.28
  -6  -7  -2   94.04   25.34
  11  -6  -3   61.48   55.77
 -11   6   3   48.66   34.00
 -11  -6   3   61.00   62.11
 -15   0  13  -21.60   56.96
 -15   0  13  -12.13   46.34
 -17   1   7  858.75   62.56
 -17   1   7  809.62  215.03
 -17  -1   7  690.04   92.84
 -17  -1   7  823.38  107.32
   1   5  11   49.96   67.92
   1  -5  11   61.86   45.32
  -1   5 -11   57.64   34.87
 -16  -2  10 1134.16   56.99
 -16   2  10 1151.07  176.10
 -16  -2  10 1299.43  102.63
 -16   2  10 1096.81  213.38
   6  -2  11  384.23  108.39
  -6  -2 -11  313.09   52.85
   6   2  11  253.88   99.50
  -6   2 -11  252.46   81.36
   6   2  11  175.10   99.38
 -14   0  14 1980.08  106.87
 -14   0  14 1875.93  104.07
  -7   3  15 1362.27  182.28
  -7  -3  15 1355.39  120.13
  -7  -3  15 1294.81  147.47
 -17   1   6  350.35   91.75
 -17   1   6  267.02   66.06
 -17  -1   6  208.75   67.11
 -17  -1   6  258.63  112.29
  -8  -5  -6  384.63   99.84
  -8  -5  -6  349.33   76.38
  -8   5  -6  435.36   50.52
   8   5   6  385.72  114.33
   8  -5   6  439.14  105.69
  13  -4   1  288.56  100.99
 -13   4  -1  408.61  125.29
 -13  -4  -1  362.44   79.55
  -6  -3  15 1658.43  110.05
  -6   3  15 1601.49   54.91
  -6  -3  15 1580.70  100.01
  -6   3  15 1553.98   53.57
  -6   3  15 1324.63  121.71
 -11   2  15 1193.62   64.20
 -11  -2  15 1229.12  291.67
 -11   2  15 1243.72  144.13
 -11  -2  15 1359.64   89.86
  14  -3   1 3298.91  157.30
 -14  -3  -1 2714.47  204.90
 -14   3  -1 3055.80  150.32
  14   3   1 3117.14  117.47
  -7   5  -7   81.83   37.35
  -7  -5  -7   63.25   24.40
   7   5   7   27.49   25.43
   7  -5   7  139.08   67.59
  -7  -5  -7   41.13   14.21
   7   5   7   40.16   22.32
  -6  -4  14  199.34  102.90
  -6  -4  14  234.73   84.34
  -6   4  14  326.48   93.89
  -2   2  15 1591.85  182.25
  -2  -2  15 1475.02  121.10
  -2   2  15 1540.53   51.27
  -2  -2  15 1484.33  131.46
 -15   2  12  -40.29   51.47
 -15  -2  12   13.77   25.34
 -15   2  12  -34.48   40.17
 -15  -2  12   35.90   29.28
  10  -1   8  391.35  107.75
 -10   1  -8  399.96  119.17
  10   1   8  416.97  127.06
 -10  -1  -8  350.09  106.04
   3  -5  10  194.51   77.05
  -3  -5 -10  158.17   32.37
   3   5  10  236.43   73.49
  -3  -5 -10  173.77   25.43
  -3   5 -10  213.72   61.93
  -5   1  16   60.13   24.36
  -5   1  16   25.66   21.54
  -5  -1  16   28.02   31.36
  -5   1  16   -6.61   86.06
  -5  -1  16    0.53   27.76
   8   0  10  321.43   83.24
  -8   0 -10  236.42   66.75
 -13  -2  14 2469.90  199.79
 -13  -2  14 2544.68  262.49
 -13   2  14 2415.93  121.29
 -13   2  14 2417.41  285.93
 -11  -6   6 8229.71  263.40
 -11   6   6 8495.54  328.55
 -11   6   6 8447.26  286.26
  11   6  -6 8753.43  245.15
 -11  -6   6 8449.58  234.14
  -9  -1  16  751.30   70.87
  -9   1  16  816.59   51.74
  -9   1  16  799.33  118.09
  -9  -1  16  864.72   83.06
  -7  -7   6   36.70   20.39
   7   7  -6   63.77   38.87
  -7   7   6   24.47   22.42
  -7   7   6  107.72   73.86
  -7  -7   6   61.68   40.93
  -7   4  14  298.05   79.44
  -7  -4  14  314.72   82.82
   7  -4 -14  209.73   50.39
  -7  -4  14  351.59  121.62
  -7   4  14  213.32   61.06
  -1  -6  10 3499.01  230.33
   1  -6 -10 3706.53   60.39
  -1   6  10 3778.50  166.55
   1   6 -10 3971.12  152.82
   9   1   9 1302.35  138.51
   9  -1   9 1488.47  216.23
  -9   1  -9 1280.57   78.45
  -9  -1  -9 1229.05   58.50
  -5  -4  14 3891.86  152.33
  -5  -4  14 4307.45  217.94
  -5   4  14 3916.79  293.43
 -17   1   8  105.13   59.23
 -17  -1   8  171.60   58.72
 -17   1   8  206.17   36.94
 -17  -1   8  130.38   91.23
 -14   3  12   60.92   63.29
 -14  -3  12  188.52   47.01
 -14  -3  12  183.63   63.07
 -14   3  12  166.22   89.16
   8  -7  -3  495.93  141.29
  -8  -7   3  409.41   50.84
  -8  -7   3  535.50  170.94
  -8  -7   3  375.40   83.81
  -8   7   3  185.23   67.23
 -13  -3  1312185.47  359.51
 -13   3  1311887.90  441.95
 -13  -3  1312523.55  434.13
 -13   3  1311513.21  338.32
  -4   0  16  348.48  233.12
  -4   0  16  465.83  122.76
  -4   0  16  350.41   45.72
  -9  -5  12  -14.12   33.45
  -9  -5  12  -29.61   57.99
  -9   5  12   22.77   36.18
   9  -5 -12    1.18   13.12
  -9   5  12   32.91   25.91
  -8  -3  15 1473.94  188.35
   8  -3 -15 1430.38   63.04
  -8  -3  15 1497.47  102.28
  -8   3  15 1482.68  144.74
 -17   0   9   23.48   26.23
 -17   0   9   14.27   44.23
  -5  -3  15 1038.47   86.69
  -5  -3  15 1018.16  119.09
  -5   3  15 1140.91  157.39
  -9  -5  -515182.48  434.02
   9  -5   514006.02  460.86
  -9  -5  -513810.62  375.03
  -9   5  -514102.32  424.96
  14   1   3  -13.56   32.21
 -14   1  -3  -11.38   46.69
 -14  -1  -3   41.37   38.53
  14  -1   3  -12.86   54.41
 -11   1  -7  -12.49   36.50
 -11  -1  -7   25.85   22.01
  11  -1   7  -13.40   47.79
  11   1   7   -8.70   29.91
 -10   0  16 1616.77  100.04
 -10   0  16 1594.57   82.41
 -12   0  -6 3088.93  154.19
  12   0   6 2993.92  158.80
  17  -1  -5  162.10   76.58
 -17   1   5  112.86   73.00
  17   1  -5   52.74   14.89
 -17  -1   5  131.54   65.20
  -8  -7   4  274.57   50.60
  -8  -7   4  316.60   82.45
  -8   7   4  101.08   87.45
   8  -7  -4  358.19   98.99
  -8  -7   4  260.74   81.06
  -6  -7   7 4560.63  194.22
  -6   7   7 4350.03  167.50
  -6   7   7 4398.29  235.12
  -6  -7   7 4425.83  148.71
  16   1  -1 1754.69  115.27
  16  -1  -1 1843.63  192.81
 -16   1   1 1557.87  177.81
 -16  -1   1 1819.05  109.84
   2   0  14  711.06   43.11
  -2   0 -14  606.88   60.23
   2   0  14  659.53  100.62
   3   2  13  217.69   68.32
   3  -2  13  282.59  157.19
  -3   2 -13  488.48  134.65
   3   2  13  464.73  146.40
  -3  -2 -13  321.54   57.79
   8  -7  -2   21.54   55.66
  -8   7   2   72.71   45.18
  -8  -7   2   29.89   53.94
  -8  -7   2    9.93   11.03
   2   7   6   49.08   41.09
  -2   7  -6    8.11   22.99
  -2  -7  -6   -5.96   20.43
  -2  -7  -6   20.83   18.74
   2  -7   6   87.36   42.29
   0   7   7  686.36  135.49
   0  -7  -7  570.36   90.34
   0  -7  -7  575.09   79.03
   0   7  -7  634.80  203.88
   0  -7   7  628.85  177.70
  -6   5  -8   80.05   26.56
  -6  -5  -8   45.83   22.74
   6  -5   8   18.30   62.17
   6   5   8   37.70   35.15
  -6  -5  -8   69.20   25.96
   6   5   8   68.96   28.55
  17   0  -4  251.81  118.58
 -17   0   4  386.20  117.39
  -8  -6  10  472.69   81.20
  -8  -6  10  609.91  245.96
  -8   6  10  451.16  118.18
  -8   6  10  323.75   95.43
  -1   2 -14 3200.61  192.11
   1   2  14 3118.13  106.92
   1  -2  14 2926.73  222.13
   1   2  14 3082.20  210.66
   1   2  14 3223.80  113.69
  13  -2   4 7324.62  256.33
 -13  -2  -4 7257.83  275.51
 -13   2  -4 6749.50  225.45
 -13  -2  -4 7167.03  233.00
  13   2   4 6641.29  214.31
  14  -4  -1  160.04   54.23
 -14  -4   1  229.54  105.26
 -14   4   1  186.42   67.79
 -15   1  13 4430.76  164.71
 -15  -1  13 4440.86  179.33
 -15   1  13 4647.69  241.87
 -15  -1  13 4457.73  164.60
 -11  -6   2  114.47   44.40
 -11   6   2  111.99   69.95
  11  -6  -2  165.38   55.36
 -16   3   6  447.82  144.75
 -16  -3   6  368.44   83.42
 -16   3   6  292.55   94.39
  16   3  -6  271.07   78.79
 -16  -3   6  524.80  155.92
 -14   1  14   53.45   39.64
 -14  -1  14   74.77   55.36
 -14   1  14   78.67   37.41
 -14  -1  14   28.68   31.45
 -11   4  13  646.97  173.42
 -11  -4  13  765.25  102.62
 -11   4  13  821.31  260.62
 -11  -4  13  662.59   85.26
  12   4   3  272.29   39.76
  12   4   3  307.22   43.30
 -12  -4  -3  341.08  110.38
 -12   4  -3  381.61   96.82
  12  -4   3  328.85   80.82
  16   2  -2  942.49  112.42
  16   2  -2  849.07  115.02
  16  -2  -2  962.33  219.49
 -16  -2   2  803.86  263.97
 -16   2   2  977.42  180.74
  13   3   3 3417.64  151.24
 -13  -3  -3 3184.54  152.13
 -13   3  -3 3257.77  266.82
  13  -3   3 3260.40  161.83
  13   3   3 2982.25  134.83
 -13  -5   8   76.31   26.10
  13   5  -8   29.87   25.35
 -13   5   8   72.84   63.89
 -13   5   8   40.57   48.50
 -13  -5   8  134.80   82.57
   8  -4 -14 2516.22   91.22
  -8  -4  14 2542.18  140.69
  -8  -4  14 2548.37  127.01
  -8   4  14 2362.30  117.39
  15  -3  -1 1039.18  266.92
  15   3  -1  966.95   28.58
 -15   3   1  919.17   97.41
 -15  -3   1 1158.32  109.01
  -2   4 -12 1445.81   84.68
   2   4  12 1490.36  123.85
   2  -4  12 1603.02  120.19
 -16  -3   715541.73  440.49
  16   3  -715664.33  432.48
 -16   3   713619.84  460.77
 -16  -3   714852.06  444.80
 -16   3   714955.26  642.64
 -14   4  10  374.71  101.97
 -14  -4  10  398.02  211.13
 -14   4  10  438.69  122.25
 -14  -4  10  438.21   57.00
   7  -6   5  153.02   63.46
  -7  -6  -5   55.20   13.96
  -7  -6  -5   51.52   20.48
  -7   6  -5   53.37   77.18
  -7  -7  -1    8.91   10.55
  -7   7  -1   20.75   51.64
  -7  -7  -1    5.58    9.27
  -7  -7  -1   30.85   34.25
   7  -7   1   24.52   45.08
  -4  -4  14  395.25   82.89
  -4   4  14  362.52  133.42
  -4  -4  14  330.56  140.86
  -8   1 -10  521.29   52.56
   8  -1  10  539.62  134.63
  -8  -1 -10  589.84   67.72
   8   1  10  620.84  132.46
  -6   6  -6 1838.24  145.61
  -6  -6  -6 1690.00  107.89
   6   6   6 1748.56  110.00
  -6  -6  -6 1712.03   87.57
  -6  -6  -6 1916.93  102.78
   6  -6   6 1735.22  197.70
 -13  -5   2  208.68   93.85
  13  -5  -2  134.60   73.22
 -11   5  11 1049.78  194.15
 -11   5  11 1108.82  109.42
 -11  -5  11 1006.73  172.72
 -11  -5  11 1035.41  105.56
 -12   5  10   75.57   37.57
 -12  -5  10   91.76   57.34
 -12   5  10   57.01   55.05
 -16  -3   5 2446.16  214.93
  16  -3  -5 2161.49  183.36
  16   3  -5 2555.45   95.29
 -16   3   5 2531.29  247.11
 -16   0  12 9418.12  302.00
 -16   0  12 7931.45  261.36
  -1  -5  12  408.31  126.45
  -1   5  12  334.22  129.65
   1   5 -12  474.04  103.00
 -15   4   611257.57  359.60
 -15  -4   612222.19  336.85
  15   4  -612411.89  338.94
 -15  -4   611998.72  372.31
 -15   4   612119.81  390.26
   4   0  13   15.71   41.37
  -4   0 -13   13.59   13.84
  -8  -7   518509.89  551.82
  -8   7   518861.23  539.99
  -8  -7   518650.44  510.20
  -8  -7   520238.99  561.70
  -4  -1  16 3295.37  150.40
  -4   1  16 3497.49  137.80
  -4  -1  16 3120.11  212.89
  -4   1  16 3313.66  131.70
  -4   1  16 3212.19  150.43
  -9  -3  15  217.20  103.94
  -9   3  15  559.71  115.04
   9  -3 -15  236.60   78.44
  -9   3  15  749.00  236.79
  -9  -3  15  647.56  192.96
 -17  -1   911275.68  363.78
 -17  -1   911777.53  352.77
 -17   1   910631.54  408.29
 -17   1   913603.27  425.74
  11   6  -7   55.97   17.84
 -11  -6   7    1.92   11.67
 -11  -6   7  107.44   81.10
 -11   6   7  -30.02   50.20
 -11   6   7   43.04   46.77
  -4  -3  15 2889.84  161.18
  -4   3  15 3425.64  210.59
  -4  -3  15 3619.57  181.74
   9  -3   8   14.57   31.45
  -9   3  -8   15.93   29.87
  -9  -3  -8   16.84   21.09
   9   3   8    6.66   15.06
 -13   0  15  130.24   68.66
 -13   0  15   22.86   31.42
 -10   1  16 1232.33  149.79
 -10  -1  16 1255.16   80.79
 -10   1  16 1115.13  179.93
 -10  -1  16 1283.12   92.83
  15  -4  -5  273.30  113.91
 -15  -4   5  342.59  108.96
  15   4  -5  141.00   34.63
  15   4  -5  172.28   48.02
 -15   4   5  236.09   71.84
 -12  -1  -6 1590.85   90.02
  12  -1   6 1717.37  124.70
  12   1   6 1561.77  168.29
 -12   1  -6 1519.68  104.32
   2   3  13 4524.47  162.29
  -2   3 -13 4977.28  270.85
   2  -3  13 4721.63  346.93
 -10   3  -7 5052.31  189.51
  10  -3   7 4724.15  207.56
 -10  -3  -7 5022.04  175.58
  10   3   7 4508.26  197.65
  -8   7   1 4221.99  162.29
  -8  -7   1 4065.45  112.84
   8  -7  -1 4242.03  188.80
 -10  -5  -4   32.19   27.70
 -10  -5  -4   19.66    9.68
  10   5   4   38.78   15.09
  10  -5   4  150.64   80.48
 -10   5  -4   26.81   36.54
  -7   0 -11   36.14   13.82
   7   0  11   62.06   40.41
  -2   1 -14  765.85  101.37
  -2  -1 -14  809.58   98.61
   2  -1  14  674.11  178.44
   2   1  14  888.78   63.99
   2   1  14  844.06  234.22
   0   0  15    4.45   14.08
   0   0  15   20.96   35.41
 -15  -4   7  740.15  220.34
 -15   4   7  571.38  165.45
 -15   4   7  518.29  153.03
 -15  -4   7  617.12   79.55
  15   4  -7  433.61   73.71
  -8  -6  -4 9677.33  263.59
   8  -6   4 8926.06  304.22
  -8  -6  -4 9561.25  350.57
   8   6   4 9436.44  261.09
  16   3  -8  154.07   44.15
 -16   3   8  231.16   72.33
 -16   3   8  227.34   93.05
 -16  -3   8  212.65   50.92
 -16  -3   8  219.88   93.87
 -10   6  -1  108.39   66.91
 -10  -6  -1   75.97   40.59
  10  -6   1  169.68  110.48
 -17   1   4  166.96   95.31
  17  -1  -4  193.94   66.83
  17   1  -4  218.16   62.28
 -17  -1   4  328.43   97.40
   0  -4  13  865.07   76.32
   0   4 -13  865.36  158.76
   0   4  13  850.72  172.03
  -2  -6  -9  164.57   41.11
   2  -6   9  265.65   81.56
  -2   6  -9  190.75   58.04
   2   6   9  166.95   55.28
  -2  -6  -9  166.17   39.80
  -5  -6  -7   49.76   19.15
   5   6   7   80.75   43.49
  -5  -6  -7   42.92   16.95
   5  -6   7  106.66   57.74
  -5   6  -7   58.54   23.16
  -5  -6  -7   70.24   32.20
   0  -8   011514.45  346.47
 -15   3  11 1463.39   96.70
 -15  -3  11 1614.74   97.50
 -15   3  11 1507.72  179.57
 -15  -3  11 1804.16  139.42
 -12  -3  14   17.84   27.21
 -12   3  14   43.74   40.66
 -12   3  14   31.90   24.99
 -12  -3  14   37.20   50.08
   4  -4  11  930.35  263.39
   4   4  11  795.58  150.59
  -4  -4 -11  815.07   24.27
   4   4  11  720.94   38.90
  -4   4 -11  824.86  220.72
  -3  -7   8   69.63   54.70
  -3  -7   8   56.86   48.91
   3  -7  -8   18.81   27.91
  -3   7   8   17.86   37.64
  -8  -3  -9 4867.89  158.89
   8   3   9 4901.58  219.15
   8   3   9 5186.57  160.88
  -8   3  -9 5211.20  207.14
   8  -3   9 4819.17  245.73
  -4  -7   8  190.10   97.71
  -4   7   8  318.19  156.05
  -4   7   8  267.79   66.37
   4  -7  -8  168.83   75.10
  -4  -7   8  285.08  146.15
 -17   0  10  696.38  184.35
 -17   0  10  752.59  180.11
  -1  -8   0 2260.03  106.02
   1  -8   0 2295.75  196.14
  -1   8   0 2075.53  195.57
  -1  -8   0 1280.05  194.64
   5  -5   9 2595.49  173.88
   5   5   9 2279.94  190.40
  -5   5  -9 2296.20  144.01
  -5  -5  -9 2325.75   87.93
   0   8  -1   90.76   35.42
   0  -8  -1  324.29   85.50
   0  -8   1  276.66   96.88
  -3   0  16 6258.29  188.06
  -3   0  16 5451.66  279.80
  -3   0  16 5994.02  218.81
   5  -7   4 1052.04  111.74
  -5   7  -4  955.31  163.52
  -5  -7  -4  880.88   98.48
  -5  -7  -4  908.22   63.70
  -7   2  16 1115.92   75.38
  -7   2  16 1083.11   97.24
  -7  -2  16 1140.60  191.23
  -7  -2  16 1134.66  102.68
  -1   8   1   70.65   31.12
  -1  -8   1   89.62   80.27
   1  -8  -1  169.22   51.58
   9  -4 -14 9163.94  257.56
  -9   4  14 9049.43  291.00
  -9   4  14 9885.33  280.00
  -9  -4  14 9542.00  303.11
  -9  -4  14 7971.79  268.66
   0   6  10  303.78  118.54
   0  -6 -10  355.62   26.65
   0  -6  10  385.25  114.23
   0   6 -10  319.13  112.34
  13   0   5    8.65   29.02
 -13   0  -5   52.38   22.69
  -9  -4  -7  313.70   85.35
  -9  -4  -7  421.62   96.51
   9   4   7  379.05   85.81
  -9   4  -7  415.91  105.94
   9  -4   7  455.08  126.01
 -16   3   4  143.48  100.71
 -16  -3   4  128.89   59.56
  16   3  -4   36.73   25.71
  16  -3  -4   53.37   26.74
  16   3  -4   76.59   21.54
 -15   4   4 1111.41  112.62
 -15  -4   4  998.55  185.96
  15  -4  -4 1154.70  282.12
 -16   1  12  765.06  258.01
 -16  -1  12  808.37  160.53
 -16  -1  12  709.43   60.46
 -16   1  12  831.10  205.32
 -16  -2  11  599.89   89.51
 -16   2  11  608.44  147.57
 -16   2  11  530.30  143.28
 -16  -2  11  528.12   61.14
  -5  -2 -12 2080.30  103.00
   5  -2  12 2274.95  175.11
   5   2  12 2167.83  132.67
   5   2  12 2247.60   89.71
  -5   2 -12 2001.65  122.67
 -11   0  16 1668.55  156.06
 -11   0  16 1901.26  227.39
 -10   6   9   32.22   28.87
 -10  -6   9   54.21   76.93
 -10  -6   9    9.82   16.24
 -10   6   9   19.86   47.35
   4   1  13 1307.15   49.15
   4  -1  13 1118.85  147.14
   4   1  13 1254.27  102.09
  -4  -1 -13 1180.49   96.98
  -4   1 -13 1321.27  132.44
 -12  -5  -1  167.19   62.28
 -12   5  -1  274.83  110.00
  12  -5   1  302.59   75.44
  -7  -7   7  112.95   46.35
  -7   7   7   19.38   33.37
  -7   7   7   14.90   76.37
  -7  -7   7   35.96   21.28
   4   3  12  563.83   71.56
  -4  -3 -12  695.46   49.95
   4   3  12  801.60  165.56
  -4   3 -12  832.57   80.79
   4  -3  12  579.85  186.00
  -5   6  11   35.41   37.52
   5  -6 -11   -1.82   10.31
  -5  -6  11   38.51   44.52
  -5  -6  11   -4.17   36.33
 -11  -3  -6   85.88   22.09
 -11   3  -6   69.12   45.34
 -11  -3  -6  125.14   42.69
  11  -3   6  129.50   73.89
  11   3   6   44.23   31.76
  -6   2  16  148.80   40.30
  -6   2  16  100.64   48.36
  -6  -2  16  235.32   93.12
  -6  -2  16  300.73   90.30
   8   4   8 2517.15  109.50
  -8  -4  -8 2542.78  144.90
  -8   4  -8 2598.64  130.41
   8   4   8 2410.36  172.07
   8  -4   8 2566.58  240.67
  -4   7  -5 3122.03  154.59
   4   7   5 2897.57  116.61
  -4  -7  -5 3125.74  139.33
  -4  -7  -5 2764.28  112.43
   4  -7   5 2832.86  194.13
 -11   6   1   86.30   48.82
  11  -6  -1   30.31   39.44
 -11  -6   1   42.44   41.05
  -8  -2  16 3815.49  140.88
  -8   2  16 3796.78  287.66
  -8   2  16 3965.57  123.03
  -8   2  16 3883.97  132.10
  -8  -2  16 3712.22  145.10
   0  -3  14   41.45   43.96
   0   3  14   -2.03   53.02
   0   3 -14   26.97   20.80
  -3   4  14   12.95   21.53
  -3  -4  14   20.39   36.44
  -3  -4  14   29.46   34.69
 -12   2  15  544.89  170.77
 -12   2  15  512.94  179.04
 -12  -2  15  353.68  103.63
 -12  -2  15  544.51  165.94
  -2  -7   8  -22.54   34.99
  -2   7   8   21.71   25.03
   2  -7  -8    4.00   20.10
   2  -7  -8    6.13   12.29
 -13   1  15  278.37  121.37
 -13  -1  15  274.17  119.82
 -13   1  15  252.19   65.35
 -13  -1  15  320.27  121.86
   4  -6 -11  247.14   51.56
  -4   6  11  287.36   76.35
  -4  -6  11  303.90  103.88
   4  -6 -11  260.11   35.66
  -4  -6  11  155.95   74.21
  -5  -7   8  635.45  163.09
  -5  -7   8  489.41   99.52
  -5   7   8  612.89  230.50
  -5   7   8  525.85  116.74
  -6  -7  -3 3677.07   79.26
  -6   7  -3 3613.26  130.15
   6  -7   3 3492.75  175.48
  -6  -7  -3 3667.78   71.29
  -6  -7  -3 3429.14  189.16
 -17   0   3   83.40   42.73
  17   0  -3   29.13   22.43
  -1  -7  -7  156.68   46.01
   1  -7   7  273.94   82.76
   1   7   7  231.42   79.38
  -1  -7  -7  170.96   60.95
  -1   7  -7   89.84   81.55
 -10  -5  12  -11.52   50.91
 -10  -5  12   39.05   40.23
  10  -5 -12    0.88   17.75
 -10   5  12   52.62   35.00
 -10   5  12   15.52   40.01
 -15  -2  -1   34.37   45.50
  15  -2   1   45.43   30.75
  15   2   1   -3.23   17.02
  15   2   1    7.39   11.29
 -15   2  -1   24.83   55.65
  -1  -8  -1  336.91   84.10
   1  -8   1  271.48  136.16
  -1  -8  -1  219.32   58.39
  -1   8  -1  211.36  141.38
  -1   2  15  561.27   36.14
  -1   2  15  753.11   95.39
  -1  -2  15  852.55  262.99
 -15  -4   8 6854.37  250.51
 -15   4   8 6474.93  248.83
  15   4  -8 7231.24  215.09
 -15  -4   8 7059.23  211.72
 -15   4   8 7007.75  377.01
  -7   1 -11 1948.98   96.98
  -7  -1 -11 2028.51  112.85
   7  -1  11 2106.05  298.99
   7   1  11 1754.38  160.30
   0   1  15   -3.97   17.15
   0  -1  15   74.21   32.87
   0   1  15   13.02   16.05
   0   1  15   13.38   23.48
   0   1 -15   11.16   18.67
   6  -5 -13  786.62   18.51
  -6  -5  13  753.32   65.16
  -6  -5  13  864.90   98.04
  -6   5  13  857.06  115.14
   2  -8  -1   75.16   36.04
  -2  -8   1  119.79   42.24
  -2  -8   1   96.57   59.11
  -2   8   1  181.90  108.90
   8   7  -6  792.77  117.00
  -8  -7   6  783.75   82.72
  -8   7   6  860.09  248.49
  -8   7   6  494.13  205.10
  -8  -7   6  566.40   97.92
  10  -4   6   -0.65   38.31
 -10   4  -6   65.67   40.20
 -10  -4  -6   15.04   17.18
 -10  -4  -6   16.65   20.85
  10   4   6    5.60   11.63
  -6   6  11  266.46   59.50
  -6   6  11  234.00  142.26
  -6  -6  11  361.52  104.32
  -6  -6  11  512.19  146.42
   6  -6 -11  310.75   41.58
 -15   0  -2 4325.00  202.93
  15   0   2 4050.75  249.27
  -5  -5  13  733.62   84.51
  -5  -5  13  818.38   75.39
  -5   5  13  818.49  258.89
   1  -8  -2  805.53   63.74
  -1   8   2 1013.44  236.78
  -1  -8   2  822.45  122.84
  -1  -8   2  806.59  131.77
 -17   2   7   18.22   22.98
 -17  -2   7   14.51   51.82
 -17   2   7   16.35   30.05
 -17  -2   7   20.24   19.31
  -2  -8   0  634.88   97.10
  -2   8   0 1136.48  151.64
  -2  -8   0 1026.82   95.29
   2  -8   0 1041.95   90.20
 -16   0   0  188.38  119.96
  16   0   0  240.80   82.17
  13   5  -9 8385.46  242.27
 -13   5   9 8501.12  333.05
 -13  -5   9 8742.57  250.83
 -13  -5   9 8997.73  320.03
 -13   5   9 8731.20  308.91
  -9  -6  10 1269.08  154.76
  -9   6  10 1391.22   82.34
  -9  -6  10 1245.93  192.08
  -9   6  10 1358.24  148.82
  17   2  -6  547.56   99.09
 -17   2   6  636.57  141.08
 -17  -2   6  692.23  198.64
  10  -3 -15    2.79   16.91
 -10  -3  15   -0.69   45.55
 -10  -3  15   17.23   46.91
 -10   3  15   78.96   44.54
 -10   3  15   21.51   22.28
   9  -6   3 1253.20  126.49
  -9  -6  -3 1084.66  133.60
  -9   6  -3 1186.94  193.69
   0  -8  -2 1435.84  117.14
   0  -8   2 1517.21  182.33
   0  -8  -2 1480.23   97.20
   0   8  -2 1511.67  265.75
  -3  -3  1511366.50  392.12
  -3  -3  1512002.33  366.25
  -3   3  1512562.62  455.69
 -16  -3   9 1413.98  126.15
 -16   3   9 1280.04  145.58
 -16  -3   9 1375.22  131.32
 -16   3   9 1277.04  138.29
 -17   1  10 1391.26  120.66
 -17  -1  10 1259.36   81.70
 -17   1  10 1234.76  141.99
 -17  -1  10 1357.06  175.00
  -2   5 -11   63.24   48.05
   2  -5  11   88.95   57.87
   2   5  11  132.95   37.29
 -10   2  -8 3279.54  157.03
 -10  -2  -8 3198.86  131.42
  10   2   8 3210.14  139.22
  10  -2   8 3037.56  240.82
  -8  -7   0   19.97   40.70
   8  -7   0   86.32   49.45
  -8   7   0   18.22   28.33
  -2   8   2 2453.63  142.47
  -2  -8   2 2507.90  232.42
  -2  -8   2 2487.86  150.26
   2  -8  -2 2436.15  176.64
  -7  -5  13 1418.91  114.52
  -7   5  13 1459.19  200.21
  -7  -5  13 1353.75   93.63
   7   3  10   28.63   32.03
  -7  -3 -10   24.60   17.00
   7   3  10    7.89   14.41
  -7   3 -10   38.24   34.58
   7  -3  10   -4.79   46.39
   4   6   8  470.18   57.67
   4  -6   8  471.33  158.89
  -4   6  -8  378.89   97.16
  -4  -6  -8  256.41   74.12
  -4  -6  -8  381.65   88.65
  -5  -2  16  126.83   49.58
  -5   2  16  220.02   87.29
  -5  -2  16  224.01   77.54
  -5   2  16  235.06   44.24
  -5   2  16  252.78   66.93
  -3   1  16  216.82   49.56
  -3  -1  16  284.94  118.68
  -3   1  16  301.66   66.54
  -3   1  16  198.50   30.36
  -3  -1  16  224.56   59.57
 -13  -4  12 8686.74  281.46
 -13   4  12 8397.75  338.29
 -13   4  12 8275.87  390.68
 -13  -4  12 9076.74  272.90
  -3  -6  11 1190.83  195.65
  -3   6  11 1171.03  104.29
   3  -6 -11 1280.52   25.42
   3  -6 -11 1110.58   22.70
  -3  -6  11 1158.75  116.01
  13  -5  -1 6406.70  236.36
 -13  -5   1 5995.81  287.76
 -13   5   1 6061.19  222.84
  -7   4  -9  204.30   52.80
  -7  -4  -9  253.16   58.83
   7  -4   9  181.27   66.79
   7   4   9  177.06   41.90
   7   4   9   88.53   42.78
  -9   2  16 6635.57  298.18
  -9   2  16 6858.84  212.08
  -9  -2  16 6693.91  224.79
  -9  -2  16 6674.32  223.18
   9  -2 -16 6841.06  199.11
 -13  -1  -5 1878.44  110.67
  13   1   5 1379.61  149.02
  13  -1   5 1390.96  169.12
 -13   1  -5 1445.44  101.21
 -11   6   823663.97  264.90
 -11  -6   823961.83  146.59
  11   6  -821201.22  578.32
 -11  -6   823711.97  237.23
 -11   6   822519.73  643.54
  -9   2  -9  857.16  108.01
   9   2   9  646.86  165.43
  -9  -2  -9  735.14   51.19
   9  -2   9  725.65  207.23
 -11  -1  16  788.78   70.74
 -11   1  16  777.75   99.14
 -11   1  16  812.49   83.84
 -11  -1  16  931.50  148.73
  -3  -7  -6   17.89   20.87
   3  -7   6  132.83   70.16
  -3   7  -6   65.79   61.69
   3   7   6  137.96   65.37
 -17  -2   8  233.30   59.15
 -17   2   8  235.11   74.35
 -17   2   8  214.41   62.46
 -17  -2   8  136.42  130.38
  -4  -5  13 4554.72  321.00
  -4  -5  13 4269.82  274.47
  -4   5  13 4297.64  167.78
  11  -5   3 2386.09  194.57
 -11   5  -3 3181.74  313.11
 -11  -5  -3 2897.41  152.10
  14   2   3  465.35   95.18
  14   2   3  500.14  118.73
 -14   2  -3  477.62  114.93
 -14  -2  -3  612.54  189.17
  14  -2   3  644.15  168.75
   1   7  -8   29.13   35.21
   1  -7  -8   30.20   16.00
  -1  -7   8    3.82   32.88
   1  -7  -8   27.43   21.01
  -1   7   8   49.53   35.87
  11  -2   7  234.82   63.99
  11   2   7  260.29   70.20
 -11  -2  -7  310.86   87.81
 -11   2  -7  276.91  159.89
  -7   7  -2   21.32   42.16
  -7  -7  -2   16.59   26.74
  -7  -7  -2    0.87    5.66
   7  -7   2   38.30   29.66
  -7  -7  -2   10.41   21.19
  17  -1  -3  320.04  113.87
 -17  -1   3  306.87   85.50
 -17   1   3  454.17  133.61
  17   1  -3  418.64  110.58
  -6   7   8  607.66  138.56
  -6  -7   8  700.08  195.44
  -6  -7   8  717.61  107.20
  -6   7   8  597.95  215.27
  17   2  -5   43.26   29.24
  17   2  -5   20.40   26.86
 -17   2   5   59.83   52.25
  17  -2  -5  100.45   62.32
 -17  -2   5   58.65   39.16
   2  -8   1  237.79   55.87
  -2   8  -1  156.92   69.67
  -2  -8  -1  166.98   51.46
  -2  -8  -1  160.41   57.65
 -15   4   3   94.61   64.53
  15  -4  -3    2.41   29.50
 -15  -4   3    5.59   52.11
   7  -6 -11   37.05   23.58
  -7  -6  11    8.84   24.64
  -7  -6  11   54.34   28.01
  -7   6  11   85.09   45.06
  -7   6  11    9.91   11.82
 -16  -2   1  465.52  182.15
 -16   2   1  581.11  155.31
  16   2  -1  459.73  125.69
  16  -2  -1  484.50  121.80
  16   2  -1  327.81   85.35
  14  -4   0   36.23   30.76
 -14  -4   0   76.70   53.28
 -14   4   0   49.88   52.96
 -13  -4  -2  331.21   88.71
  13  -4   2  396.93  126.35
  13   4   2  261.32   33.55
 -13   4  -2  438.44  147.78
  -1  -8  -2 2196.53   99.55
   1  -8   2 2396.06  131.57
  -1   8  -2 2121.24  238.76
  -1  -8  -2 2172.30  178.92
   0   5  12  763.41  108.99
   0   5 -12  831.88   88.49
   0  -5  12  938.47   95.74
   6   0  12 4137.18  340.21
  -6   0 -12 4081.41  164.59
  -3   8   1   -8.29   48.23
   3  -8  -1   38.92   48.37
  -3  -8   1   -9.89   23.06
  -3  -8   1    6.57   53.16
  15  -1   2   51.90   33.61
 -15  -1  -2   -0.04   48.82
 -15   1  -2   63.63   51.07
  15   1   2   22.99   35.92
  12  -3   514447.73  484.11
 -12   3  -515043.19  496.40
 -12  -3  -515071.25  509.50
 -12  -3  -515518.12  477.74
  12   3   514256.84  447.70
 -16  -3   3  411.14  102.27
  16  -3  -3  305.58  100.49
 -16   3   3  242.34  108.63
  16   3  -3  138.65   61.15
 -11  -4  -5  885.28   41.32
 -11   4  -5 1034.33  221.27
  11  -4   5  955.21  269.38
  11   4   5  817.82  103.46
 -11  -4  -5  849.72   84.55
 -15  -2  13  178.01   67.78
 -15   2  13  189.98  117.72
 -15  -2  13  211.03   64.17
 -16  -1   0   -0.55   55.30
  16  -1   0  133.85  132.30
 -16   1   0   -1.09   47.03
  16   1   0   24.80   15.04
 -12   4  13 1524.82  194.24
 -12  -4  13 1413.75  164.97
 -12   4  13 1574.14  248.71
 -12  -4  13 1423.95  188.04
  10  -4 -14 8355.46  264.33
 -10  -4  14 7436.39  312.50
 -10  -4  14 7460.03  261.12
 -10   4  14 7431.32  394.99
 -10   4  14 8070.03  268.50
 -14  -2  14 1036.45  133.74
 -14   2  14 1065.65   96.42
 -14   2  14 1016.94   96.63
 -14  -2  14 1102.55   89.78
 -14  -4  11 1056.20  155.80
 -14   4  11  963.74  123.08
 -14  -4  11  838.03  100.21
 -14   4  11  845.66  197.26
  -3   8   2 5685.13  210.47
  -3  -8   2 6224.56  285.97
   3  -8  -2 6599.94  232.43
  -3  -8   2 5864.60  203.49
 -14   3  -2   53.73   32.10
  14   3   2   45.13   20.72
  14   3   2   34.62   15.58
 -14  -3  -2   59.44   37.28
  14  -3   2   52.56   32.39
  15  -3   0  135.70   70.51
  15   3   0   55.55   20.95
 -15  -3   0   49.94   32.13
 -15   3   0   43.08   43.33
   1  -8  -3  247.26   86.62
  -9  -7   4 1925.23  280.59
  -9  -7   4 1799.36  141.74
  -9   7   4 2048.96  186.70
  -9  -7   4 1931.45  151.50
   9  -7  -4 1814.87  182.33
  -9   7   3  712.52  181.32
  -9  -7   3  717.46  125.10
   9  -7  -3  747.77  134.23
  -9  -7   3  582.69   20.81
  -9  -7   3  619.99   30.37
  -8  -5  13 8367.39  307.01
  -8  -5  13 9722.86  324.68
   8  -5 -13 8861.60  274.91
  -8   5  13 8519.94  331.51
  -2  -8   3   92.32   39.73
   2  -8  -3   83.47   41.91
  -2   8   3   24.38   36.05
  -2  -8   3   44.71   43.33
  -4   5 -10  842.81  227.78
   4  -5  10  755.59  125.87
   4   5  10  829.99   79.64
  -4  -5 -10  695.23   45.89
  -3   8   0 7130.64  266.98
  -3  -8   0 7267.32  240.54
 -15   4   9   26.97   30.08
 -15  -4   9   53.25   51.15
 -15  -4   9   34.87   48.35
  15   4  -9    1.07   11.79
 -15   4   9   49.95   45.66
  -8   2 -10 1991.76  250.76
   8   2  10 2377.11  205.24
   8  -2  10 2264.25  289.85
  -8  -2 -10 2263.82  183.95
 -15   0  14 6766.21  320.16
 -15   0  14 8370.97  373.36
 -17   0  11   -0.23   39.39
 -17   0  11   11.07   26.23
 -14  -5   5  342.95  102.94
 -14   5   5  145.95  112.01
  14  -5  -5  236.45  108.70
 -12  -6   5   -0.85   33.37
  12  -6  -5   55.88   37.20
 -12   6   5  -45.30   56.29
  -2  -4  14  257.50   88.32
  -2  -4  14  301.72   91.22
  -2   4  14  146.67  117.46
 -14   5   6  421.23  123.58
 -14  -5   6  297.85   86.85
 -14   5   6  405.86  151.09
  14   5  -6  271.72   46.71
 -14  -5   6  260.93   39.11
  -2   6  11  344.58  117.73
  -2  -6  11  337.06   97.27
 -14   3  13 3301.88  295.31
 -14  -3  13 3041.35  247.92
 -14   3  13 3182.17  264.52
 -14  -3  13 3149.14  279.58
 -12  -6   4 1378.41  142.95
  12  -6  -4 1222.39  373.62
 -12   6   4 1194.33  207.82
  -4   2  16 7135.48  220.46
  -4   2  16 6677.17  211.39
  -4   2  16 6990.05  256.62
  -4  -2  16 6900.38  251.06
  -4  -2  16 7623.65  298.31
   0  -8  -3 1174.16   72.02
   0  -8   3 1233.13  131.91
   0  -8  -3 1216.07  132.97
   0   8  -3 1438.08  175.85
  -2   0  16 3520.25  276.88
  -2   0  16 3568.18  275.80
  -2   0  16 3128.22  312.90
 -17   2   9   55.36   35.72
 -17   2   9   39.97   26.56
 -17  -2   9   25.62   17.74
 -17  -2   9    1.35   51.55
  -3  -5  1310789.42  368.60
  -3  -5  1310566.72  363.34
  -3   5  1310577.20  354.75
 -10  -2  16 6018.30  281.26
 -10  -2  16 5564.40  214.75
 -10   2  16 5727.84  267.65
  10  -2 -16 5940.10  199.78
 -10   2  16 6256.88  402.78
  14   0   4   33.93   26.39
 -14   0  -4   44.24   42.99
  12  -2   6 9927.61  427.76
 -12   2  -610248.39  380.13
 -12  -2  -610442.45  342.49
  12   2   610053.08  329.45
  -9  -7   5 7649.46  239.31
  -9  -7   5 7585.82  247.93
   9  -7  -5 7966.48  300.21
  -9   7   5 7176.32  280.60
  -9  -7   5 7351.08  319.51
 -12   5  11 3398.49  303.46
 -12  -5  11 3724.10  293.63
 -12  -5  11 3785.21  322.04
 -12   5  11 3835.50  350.17
  -9  -7   2  693.66   98.29
  -9   7   2  651.42  165.26
   9  -7  -2  747.33  137.57
 -11   6   0 1026.13   95.84
 -11  -6   0  445.58  184.62
  11  -6   0 1131.11  305.85
 -12   0  16  436.39   99.48
 -12   0  16  417.82  129.92
  -6  -4 -10 9759.11  308.87
  -6   4 -10 9653.15  412.27
   6   4  1011311.82  349.15
   6  -4  1010671.25  420.17
   6   4  10 9729.72  319.70
  -8   7   7 2774.50  293.75
  -8  -7   7 3230.83  287.58
  -8  -7   7 2910.80  229.49
  -8   7   7 2753.58  234.86
   2  -2  14 3400.02  292.94
   2   2  14 3778.98  346.22
   2   2  14 3643.01  281.12
  -2   2 -14 3737.56  299.98
   1  -6  10  773.46  215.16
  -1  -6 -10  613.13   31.05
   1   6  10  701.05  114.19
  -1   6 -10  753.95   85.81
  -1  -6 -10  616.78   39.16
  -3  -8   3   67.31   42.96
  -3   8   3   32.20   19.72
  -3  -8   3   52.81   36.84
   3  -8  -3   81.55   49.24
 -12  -6   6 3893.42  296.37
  12   6  -6 4308.66   53.79
 -12   6   6 4030.42  433.81
 -12  -6   6 4394.16  119.41
 -12   6   6 4069.48  419.61
  -6  -1 -12   16.50    7.79
  -6   1 -12   55.46   38.83
   6   1  12   41.36   50.94
   6  -1  12   63.38   69.11
 -17   2   4  761.27  103.85
  17   2  -4  603.18  121.70
  17   2  -4  441.42   94.25
 -17  -2   4  665.14  208.95
  17  -2  -4  726.39  223.75
 -14  -5   4   37.50   38.14
  14  -5  -4  222.88   74.92
 -10  -6  -2 4565.33  182.87
  10  -6   2 4982.17  293.79
 -10   6  -2 4436.99  164.66
 -16   0  13  -22.33   40.83
 -16   0  13   72.14   77.78
  -2   7  -7 1806.74  165.69
  -2  -7  -7 1511.29  135.28
  -2  -7  -7 1567.34  127.85
   2   7   7 1673.81  174.55
   2  -7   7 1541.61  178.88
  17   0  -2 3425.90  282.14
 -17   0   2 3498.02  354.58
 -14   5   7  607.90  195.54
 -14   5   7  405.53  124.70
  14   5  -7  238.71   47.12
 -14  -5   7  326.37  116.43
 -14  -5   7  377.43   58.30
 -16  -3  10  514.01  212.58
 -16   3  10  490.16  166.28
 -16  -3  10  404.92   91.09
 -16   3  10  414.73  141.56
  -2  -8  -2 6828.77  240.55
  -2   8  -2 6720.60  247.10
   2  -8   2 7242.04  257.49
  -2  -8  -2 6607.98  220.79
  -6  -3 -11 2069.12  169.68
   6   3  11 2153.15  176.30
   6   3  11 2058.34  179.14
  -6   3 -11 2108.74  187.99
   6  -3  11 2165.32  191.43
  -1   4 -13  940.83   91.68
   1   4  13  801.03   83.90
   1  -4  13  884.88   94.26
  -3   4 -12  272.49   97.27
   3   4  12  303.67   88.11
   3  -4  12  337.58   76.64
 -11   3  15   25.14   25.48
 -11   3  15   32.85   39.65
 -11  -3  15   47.18   47.41
 -11  -3  15   27.70   45.40
  11  -3 -15    7.75   15.78
   8  -6 -11   15.55   28.52
  -8   6  11    8.13   24.21
  -8   6  11   75.29   50.89
  -8  -6  11   25.10   36.74
  -8  -6  11   69.85   63.07
   0  -7  -8  385.01   95.24
   0  -7  -8  438.06   42.31
   0   7   8  385.14  148.87
   0  -7   8  483.26  161.93
   0   7  -8  577.44  211.78
  -3   0 -14  342.33  103.76
   3   0  14  400.37   98.55
  12  -6  -3   42.81   23.34
 -12  -6   3   79.11   46.77
 -12   6   3   30.91   57.24
 -14   0  15    1.99   14.90
 -14   0  15   29.52   39.08
  -2  -3  15 9015.72  326.57
  -2   3  15 9955.49  425.52
  -2  -3  1511019.48  417.82
 -15   3  12   54.63   37.67
 -15   3  12   53.35   34.55
 -15  -3  12   42.58   29.79
 -15  -3  12   84.30   62.60
  -7  -7   8  553.89  104.98
  -7  -7   8  614.24  182.16
  -7   7   8  570.46  120.76
  -7   7   8  687.77  205.00
  -3  -6  -9  254.73   42.61
  -3   6  -9  381.23  102.48
   3  -6   9  406.11  134.98
  -3  -6  -9  346.72   65.57
   3   6   9  256.80   92.17
  -3   8  -1   28.64   55.71
  -3  -8  -1   25.44   24.83
   3  -8   1   37.93   32.42
  -3  -8  -1   46.11   36.35
 -13  -3  14  472.34  118.72
 -13   3  14  520.28  140.38
 -13  -3  14  562.05  146.17
 -13   3  14  422.85  127.23
  -8  -7  -1   69.58   36.69
   8  -7   1   72.16   47.32
  -8   7  -1   31.38   50.53
 -15   1  14  997.86   99.71
 -15  -1  14 1146.30  121.30
 -15   1  14  950.90  276.06
 -15  -1  14 1052.86   73.25
  -1   0 -15    7.53   11.07
   1   0  15   -0.64   17.01
   1   0  15   22.58   27.05
 -17  -1  11  -21.52   53.50
 -17   1  11   27.65   52.63
 -17  -1  11   77.52   52.84
 -17   1  11   -3.65   45.75
 -11   5  12  597.50  122.36
 -11   5  12  759.80   94.66
 -11  -5  12  600.04   79.97
 -11  -5  12  776.51  194.14
  -4   8   2 5883.64  218.02
  -4  -8   2 7207.88  335.20
  -4  -8   2 7233.75  245.45
   4  -8  -2 6750.22  239.82
 -16   2  12  768.01  171.62
 -16   2  12  754.38   90.72
 -16  -2  12  816.23  227.58
 -16  -2  12  758.51   67.21
  -4  -8   1   74.97   32.33
  -4   8   1   61.61   53.39
   4  -8  -1   90.59   59.75
  -4  -8   1   87.02   74.24
   1  -8   3 2483.89  211.71
  -1  -8  -3 2231.39  186.61
  -1   8  -3 2523.91  263.85
  -1  -8  -3 2263.91  250.22
  -4  -2 -13  799.89   68.85
   4   2  13  719.10  112.07
   4  -2  13  877.66  235.04
   4   2  13  540.66  157.97
  -4   2 -13  905.91  108.95
   8   5   7    7.57   16.62
  -8  -5  -7   11.84    9.64
  -8  -5  -7   32.96   24.45
  -8   5  -7   -8.14   30.09
   8  -5   7  146.19   74.71
 -13  -5  10   60.98   27.08
 -13   5  10   44.88   26.97
 -13  -5  10   81.50   55.83
 -13   5  10  117.43   95.89
  13   5 -10   53.28   28.96
  -2  -1  16  452.34   74.04
[truncated: 489,672 more chars]
